# Supplementary material for: Interplay between cohesin and TORC1 links chromosome segregation and gene expression to environmental changes
Source: bioRxiv preprint, doi:10.1101/2024.07.24.603895, version 3 (2026-01-29)
Supplement: Supplementary file 2 [file 603895_file03.xlsx]

## Sheet: MERGED
							mis4-G1487D vs wt					mip1-R401G vs wt					mis4-G1487D mip1-R401G vs wt
EXPERIMENT		gene_id	geneID_EXP	symbol	length	AveExpr	logFC	LR	PValue	FDR	DE	logFC	LR	PValue	FDR	DE	logFC	LR	PValue	FDR	DE
G1	_	SPAC1002.01	SPAC1002.01_G1	mrx11	540	2.54065	-0.0162622	0.00332202	0.954038	0.995634	0	-0.0309539	0.0113973	0.914981	0.955755	0	0.111811	0.160559	0.688642	0.825938	0
G1	_	SPAC1002.02	SPAC1002.02_G1	pom34	993	5.08846	0.0902714	0.410849	0.521539	0.995634	0	0.31767	5.09374	0.0240123	0.0801306	0	0.294035	4.48086	0.0342765	0.119009	0
G1	_	SPAC1002.03c	SPAC1002.03c_G1	gls2	3227	8.82332	-0.012615	0.0168735	0.896647	0.995634	0	-0.368421	14.1785	0.000166261	0.00138374	-1	-0.331371	11.5375	0.000682071	0.00548484	-1
G1	_	SPAC1002.04c	SPAC1002.04c_G1	taf11	868	5.06347	0.14871	0.872447	0.350279	0.983844	0	-0.136767	0.695325	0.404359	0.592915	0	-0.0396279	0.0602575	0.806089	0.897134	0
G1	_	SPAC1002.05c	SPAC1002.05c_G1	jmj2	2250	5.74721	-0.0296421	0.0454343	0.831207	0.995634	0	0.147926	1.12773	0.28826	0.474402	0	0.175465	1.61962	0.203144	0.397893	0
G1	_	SPAC1002.06c	SPAC1002.06c_G1	bqt2	357	1.90234	-0.429458	1.58229	0.208431	0.932066	0	-0.248157	0.52179	0.470079	0.650615	0	-0.108828	0.110263	0.739845	0.858962	0
G1	_	SPAC1002.07c	SPAC1002.07c_G1		945	7.50606	-0.129513	1.85763	0.172899	0.919597	0	-0.900862	83.7637	5.57592e-20	6.24006e-18	-1	-0.876755	80.8773	2.40177e-19	3.27215e-17	-1
G1	_	SPAC1002.08c	SPAC1002.08c_G1	mtf1	1882	6.20742	-0.187652	3.13807	0.0764844	0.780665	0	-0.0486007	0.208066	0.648288	0.789193	0	-0.108483	1.05482	0.3044	0.512403	0
G1	_	SPAC1002.09c	SPAC1002.09c_G1	dld1	2398	7.24726	0.216529	3.9497	0.0468797	0.659382	0	-0.267309	5.78934	0.0161237	0.0584937	0	-0.13082	1.41146	0.234814	0.438903	0
G1	_	SPAC1002.10c	SPAC1002.10c_G1	sgt1	2057	6.23513	0.0509527	0.264661	0.606936	0.995634	0	-0.0836327	0.681656	0.409017	0.596535	0	-0.220407	4.76684	0.029013	0.105694	0
G1	_	SPAC1002.11	SPAC1002.11_G1	gaa1	2069	5.974	0.0202657	0.02537	0.873449	0.995634	0	-0.101616	0.616535	0.432338	0.617712	0	-0.104941	0.672669	0.412123	0.615826	0
G1	_	SPAC1002.12c	SPAC1002.12c_G1		1939	4.65198	-0.077345	0.189368	0.663443	0.995634	0	-0.386477	4.42764	0.0353613	0.107109	0	-0.414701	5.20645	0.0225032	0.0874319	0
G1	_	SPAC1002.13c	SPAC1002.13c_G1	psu1	2013	9.27355	-0.162636	2.52795	0.111846	0.862289	0	-0.220272	4.61651	0.0316656	0.0987304	0	-0.239377	5.45865	0.0194717	0.0788302	0
G1	_	SPAC1002.18	SPAC1002.18_G1	urg3	1495	6.18941	0.0862241	0.554951	0.456302	0.995634	0	0.292573	6.37366	0.0115827	0.0454246	1	0.278972	5.89759	0.0151616	0.0645278	0
G1	_	SPAC1002.14	SPAC1002.14_G1	itt1	1679	6.47869	0.165305	2.71006	0.0997174	0.839156	0	0.406546	16.4187	5.07823e-05	0.000491889	1	0.208444	4.3155	0.0377666	0.127055	0
G1	_	SPAC1006.03c	SPAC1006.03c_G1	red1	2603	6.73454	0.0328966	0.119198	0.729906	0.995634	0	0.247843	6.75932	0.00932595	0.0384167	1	0.142691	2.26261	0.132531	0.297589	0
G1	_	SPAC1002.15c	SPAC1002.15c_G1	med6	2524	4.88456	-0.0831032	0.382922	0.536044	0.995634	0	-0.0321298	0.05541	0.813903	0.895808	0	-0.0217511	0.026497	0.870692	0.930848	0
G1	_	SPAC1002.16c	SPAC1002.16c_G1	tna1	2097	2.65466	-0.162354	0.404022	0.525019	0.995634	0	-0.636794	5.30003	0.0213251	0.0729899	0	-0.256157	0.984381	0.32112	0.531412	0
G1	_	SPAC1002.17c	SPAC1002.17c_G1	urg2	1343	3.20302	-0.0322512	0.0201465	0.887129	0.995634	0	-0.00496831	0.000458331	0.98292	0.991861	0	0.0352496	0.0244367	0.875779	0.934549	0
G1	_	SPMIT.03	SPMIT.03_G1	cox1-I2b	753	9.3175	-0.583963	17.0958	3.55406e-05	0.0148489	-1	-0.828717	33.9918	5.53437e-09	1.334e-07	-1	-0.760268	28.7818	8.10088e-08	1.83279e-06	-1
G1	_	SPAC1002.19	SPAC1002.19_G1	urg1	1791	3.36066	0.536814	5.58442	0.0181209	0.507757	0	0.429052	3.33721	0.0677295	0.174388	0	0.505238	4.90205	0.0268248	0.0997692	0
G1	_	SPAC1002.20	SPAC1002.20_G1		749	1.43624	-0.462187	1.62145	0.202889	0.931507	0	-1.00617	6.27608	0.0122378	0.0471946	-1	-1.11354	8.10369	0.00441752	0.0250313	-1
G1	_	SPAC1006.01	SPAC1006.01_G1	psp3	1878	6.64172	0.0799957	0.258904	0.610874	0.995634	0	-0.0357336	0.050991	0.821348	0.90005	0	-0.0372903	0.0558358	0.813203	0.900096	0
G1	_	SPAC1006.02	SPAC1006.02_G1	asa1	1440	6.396	-0.0409399	0.169823	0.680269	0.995634	0	0.211561	4.55078	0.0329037	0.10143	0	0.0316493	0.102218	0.749183	0.864347	0
G1	_	SPAC10F6.06	SPAC10F6.06_G1	vip1	1152	8.19538	0.00369803	0.00137086	0.970465	0.996661	0	-0.260595	6.67258	0.00979071	0.0399469	-1	-0.143762	2.05357	0.151849	0.327221	0
G1	_	SPMIT.02	SPMIT.02_G1	cox1-I1b	1155	9.71176	-0.568823	18.1482	2.0436e-05	0.00914802	-1	-0.644785	23.2743	1.40466e-06	2.04721e-05	-1	-0.628488	22.159	2.50971e-06	4.0537e-05	-1
G1	_	SPAC1006.04c	SPAC1006.04c_G1	mcp3	4105	5.03876	-0.057852	0.144703	0.703649	0.995634	0	0.284573	3.55165	0.0594864	0.158369	0	0.1873	1.55995	0.211672	0.408546	0
G1	_	SPAC1006.05c	SPAC1006.05c_G1	och1	2211	5.89054	-0.0493577	0.078432	0.779434	0.995634	0	-0.46618	6.7557	0.00934484	0.0384531	-1	-0.383295	4.65595	0.0309461	0.110476	0
G1	_	SPAC1006.06	SPAC1006.06_G1	rgf2	4239	7.09255	-0.160294	2.34767	0.12547	0.889217	0	-0.113204	1.15589	0.282319	0.467677	0	-0.0877737	0.705501	0.400942	0.605879	0
G1	_	SPAC1006.07	SPAC1006.07_G1	tif1	1546	11.3479	0.131402	1.29995	0.254222	0.951104	0	0.284334	6.06507	0.0137881	0.0518046	0	0.241169	4.37567	0.0364556	0.124032	0
G1	_	SPAC1006.08	SPAC1006.08_G1	etd1	1591	4.89044	0.0871363	0.233893	0.628652	0.995634	0	0.493577	7.63715	0.00571783	0.0258354	1	0.304223	2.91111	0.0879711	0.228346	0
G1	_	SPAC1006.09	SPAC1006.09_G1	win1	5034	7.53647	-0.10257	0.89492	0.344148	0.983844	0	0.228534	4.46156	0.0346657	0.105564	0	0.349843	10.5768	0.00114518	0.00840377	1
G1	_	SPAC1039.01	SPAC1039.01_G1		2927	5.03528	-0.0726539	0.222869	0.636862	0.995634	0	-0.0293602	0.0355586	0.85043	0.916376	0	0.152258	1.00386	0.316378	0.527044	0
G1	_	SPAC1039.02	SPAC1039.02_G1		2908	9.34112	-0.0739085	0.426996	0.513467	0.995634	0	0.948682	69.9511	6.07929e-17	4.64621e-15	1	1.05879	86.9882	1.09171e-20	1.62899e-18	1
G1	_	SPAC1039.03	SPAC1039.03_G1		1763	5.57376	0.0181866	0.0193214	0.889449	0.995634	0	-0.463369	11.5025	0.000695044	0.0046837	-1	-0.252858	3.60625	0.0575627	0.171539	0
G1	_	SPAC1039.04	SPAC1039.04_G1		2074	4.33448	0.0616932	0.130988	0.71741	0.995634	0	-0.282291	2.49798	0.113993	0.254587	0	-0.247659	2.00018	0.15728	0.335035	0
G1	_	SPMITTRNAGLN.01	SPMITTRNAGLN.01_G1		73	7.3431	-0.564581	18.9475	1.34364e-05	0.00811361	-1	-0.488811	14.1165	0.000171831	0.00142631	-1	-0.390322	9.08125	0.00258244	0.0161842	-1
G1	_	SPAC1039.05c	SPAC1039.05c_G1	klf1	2811	5.55459	0.116563	0.743516	0.388537	0.991043	0	-0.123033	0.785814	0.375369	0.564678	0	0.116385	0.738323	0.390199	0.595807	0
G1	_	SPAC1039.06	SPAC1039.06_G1		2157	4.77481	0.186859	1.66952	0.196322	0.925346	0	-0.764803	22.9756	1.6407e-06	2.34756e-05	-1	-0.324781	4.65238	0.0310105	0.110548	0
G1	_	SPAC1039.07c	SPAC1039.07c_G1		1872	4.82692	0.176491	0.928586	0.335231	0.982694	0	-0.31042	2.66287	0.102715	0.238061	0	-0.0337704	0.0329494	0.85596	0.923764	0
G1	_	SPAC1039.08	SPAC1039.08_G1		1310	2.8774	0.308347	1.18191	0.276967	0.963832	0	-1.04688	10.5586	0.0011565	0.00716184	-1	-0.504928	2.8045	0.0940004	0.238117	0
G1	_	SPAC1039.09	SPAC1039.09_G1	isp5	3273	3.83691	-0.0432686	0.0276762	0.867872	0.995634	0	-1.36345	22.7517	1.84343e-06	2.59613e-05	-1	-0.381716	2.05086	0.15212	0.327382	0
G1	_	SPAC1039.10	SPAC1039.10_G1	mmf2	985	4.38226	0.29628	1.99013	0.158327	0.919597	0	-1.25133	28.9095	7.58384e-08	1.44462e-06	-1	-0.691828	9.78539	0.00175904	0.0118792	-1
G1	_	SPMITTRNASER.02	SPMITTRNASER.02_G1		82	6.5971	-0.432982	14.6165	0.000131757	0.0375328	-1	-0.471876	16.9443	3.84925e-05	0.000384741	-1	-0.254383	5.09424	0.0240054	0.0920135	0
G1	_	SPAC1039.11c	SPAC1039.11c_G1	gto1	3672	5.54533	-0.00691086	0.00402851	0.949392	0.995634	0	-0.612725	27.3487	1.69875e-07	3.02445e-06	-1	-0.319487	8.1715	0.00425537	0.024222	-1
G1	_	SPMIT.06	SPMIT.06_G1		2424	12.392	-0.400148	16.3697	5.21121e-05	0.019211	-1	-0.395083	15.9601	6.46928e-05	0.000611508	-1	-0.326444	10.9065	0.00095828	0.00724432	-1
G1	_	SPAC105.01c	SPAC105.01c_G1	kha1	3171	5.76661	-0.117478	0.506325	0.476734	0.995634	0	0.0182313	0.0121035	0.912397	0.954749	0	-0.00189377	0.000130808	0.990875	0.994861	0
G1	_	SPAC105.02c	SPAC105.02c_G1		1303	7.77337	0.054223	0.307711	0.579088	0.995634	0	-0.318171	10.2844	0.00134158	0.00805334	-1	-0.168556	2.93404	0.0867301	0.226757	0
G1	_	SPAC105.03c	SPAC105.03c_G1		2775	6.21921	-0.0501658	0.155873	0.692985	0.995634	0	-0.243746	3.55188	0.0594781	0.158369	0	-0.134405	1.10724	0.292682	0.499929	0
G1	_	SPAC1071.01c	SPAC1071.01c_G1	pta1	2610	7.59041	0.0705401	0.660335	0.416442	0.995634	0	-0.0627768	0.510656	0.474855	0.654479	0	-0.101609	1.34956	0.245355	0.451383	0
G1	_	SPAC1071.02	SPAC1071.02_G1	mms19	3382	7.75175	0.0285516	0.0992997	0.752672	0.995634	0	0.0262849	0.0831908	0.773019	0.87155	0	-0.0161383	0.0315992	0.85891	0.925409	0
G1	_	SPAC1071.03c	SPAC1071.03c_G1	sil1	1829	6.61397	-0.00848854	0.0094215	0.922675	0.995634	0	-0.324	12.7875	0.000348946	0.0026096	-1	-0.214024	5.83313	0.0157271	0.0663403	0
G1	_	SPAC1071.04c	SPAC1071.04c_G1	spc2	504	3.64314	0.0982471	0.25016	0.616962	0.995634	0	-0.691253	10.194	0.00140902	0.00834256	-1	-0.444228	4.64066	0.031223	0.110931	0
G1	_	SPAC1071.05	SPAC1071.05_G1	hpm1	1692	7.12992	0.0320702	0.112017	0.73786	0.995634	0	-0.245458	6.31332	0.0119834	0.0465593	-1	-0.305448	9.87367	0.00167661	0.0114584	-1
G1	_	SPAC1071.06	SPAC1071.06_G1	arp9	1875	5.55404	-0.150676	1.39283	0.237927	0.947728	0	-0.0754698	0.342898	0.558161	0.722727	0	-0.108551	0.725814	0.394244	0.599578	0
G1	_	SPAC1071.07c	SPAC1071.07c_G1	rps1502	767	10.2683	0.106572	1.13948	0.285761	0.968013	0	-0.0813745	0.661984	0.415861	0.602846	0	-0.0664422	0.441559	0.506371	0.693581	0
G1	_	SPAC1071.08	SPAC1071.08_G1	rpp203	435	5.2383	0.0870919	0.149061	0.699434	0.995634	0	-0.0896331	0.152673	0.695994	0.821895	0	-0.226872	0.98951	0.319862	0.530097	0
G1	_	SPMITTRNAALA.01	SPMITTRNAALA.01_G1		73	6.67714	-0.348908	14.1929	0.00016499	0.0430829	-1	-0.445361	22.2186	2.43305e-06	3.32814e-05	-1	-0.272569	8.67309	0.00322944	0.0194792	-1
G1	_	SPAC1071.09c	SPAC1071.09c_G1		2586	4.9247	0.0071632	0.00277926	0.957956	0.995634	0	0.0814014	0.349518	0.554386	0.720369	0	0.0547886	0.163597	0.685866	0.823823	0
G1	_	SPAC1071.10c	SPAC1071.10c_G1	pma1	4535	12.3998	-0.318011	4.82252	0.0280902	0.580933	0	-0.0515312	0.127175	0.721379	0.839276	0	0.0184413	0.0162167	0.898667	0.947765	0
G1	_	SPAC1071.11	SPAC1071.11_G1		2247	5.1955	-0.098144	0.488415	0.484635	0.995634	0	0.146477	1.09122	0.296202	0.484041	0	0.153571	1.23317	0.266791	0.474078	0
G1	_	SPAC1071.12c	SPAC1071.12c_G1	stp1	902	6.25168	0.053931	0.199108	0.655442	0.995634	0	0.0154052	0.0158466	0.899824	0.946881	0	-0.0141748	0.013605	0.907145	0.952115	0
G1	_	SPAC1071.13	SPAC1071.13_G1		3806	5.05194	-0.0534486	0.10106	0.750562	0.995634	0	0.0294867	0.0302434	0.861939	0.922571	0	-0.0161867	0.00925029	0.923379	0.959512	0
G1	_	SPAC1093.01	SPAC1093.01_G1	ppr5	5439	7.68965	0.0347651	0.108498	0.74186	0.995634	0	0.0410667	0.149789	0.698737	0.823892	0	0.0757365	0.514575	0.473165	0.665957	0
G1	_	SPAC1093.02	SPAC1093.02_G1	pdx3	1199	8.27012	0.055947	0.306146	0.580055	0.995634	0	-0.457759	19.9507	7.94651e-06	9.72672e-05	-1	-0.419968	16.9686	3.80034e-05	0.000457135	-1
G1	_	SPAC1093.03	SPAC1093.03_G1	fig4	3509	6.74714	-0.162364	2.95924	0.0853883	0.803569	0	0.0379828	0.161529	0.687753	0.816693	0	0.029598	0.100093	0.751718	0.865201	0
G1	_	SPAC1296.02	SPAC1296.02_G1	cox4	762	6.25816	0.334734	10.9824	0.000919793	0.131008	0	0.266068	6.6886	0.00970315	0.0396412	1	0.110468	1.15995	0.281476	0.490822	0
G1	_	SPAC1093.04c	SPAC1093.04c_G1	cca1	4668	6.81405	0.150923	2.48358	0.11504	0.868894	0	0.0238034	0.0599201	0.806622	0.890696	0	-0.190122	3.81225	0.0508791	0.156688	0
G1	_	SPAC1093.05	SPAC1093.05_G1	hca4	2749	7.2563	0.0449911	0.188509	0.66416	0.995634	0	0.497285	23.2854	1.39659e-06	2.0402e-05	1	0.429761	17.4917	2.88566e-05	0.000355992	1
G1	_	SPAC1093.06c	SPAC1093.06c_G1	dhc1	12946	8.26215	0.0310899	0.0874776	0.767409	0.995634	0	0.349379	11.0581	0.000883011	0.00574645	1	0.294766	7.90181	0.00493854	0.027149	1
T4D_36.5	_	SPNCRNA.287	SPNCRNA.287_T4D_36.5		695	2.40264	2.09978	14.1692	0.000167081	0.0161316	1	3.69533	57.9066	2.74868e-14	2.44632e-12	1	3.54057	50.1951	1.39192e-12	6.90486e-11	1
G1	_	SPAC12B10.04	SPAC12B10.04_G1	pby1	1516	6.68135	0.0689166	0.515405	0.472808	0.995634	0	0.294657	9.41126	0.00215658	0.0117612	1	0.241923	6.43522	0.0111879	0.0515928	0
G1	_	SPAC12G12.03	SPAC12G12.03_G1	cip2	3093	7.39616	-0.0659905	0.371414	0.542234	0.995634	0	-0.271645	6.1503	0.013139	0.0497835	-1	-0.207937	3.65832	0.05579	0.167148	0
G1	_	SPAC1093.07	SPAC1093.07_G1		1992	4.18388	0.124115	0.366369	0.54499	0.995634	0	-0.0436469	0.0431663	0.835413	0.906987	0	-0.329922	2.45361	0.117255	0.274453	0
G1	_	SPAC10F6.01c	SPAC10F6.01c_G1	sir1	5175	9.66885	-0.405646	7.15034	0.00749497	0.355841	0	-0.338857	4.98468	0.0255727	0.0838202	0	-0.265083	3.05447	0.0805152	0.21542	0
G1	_	SPAC10F6.02c	SPAC10F6.02c_G1	prp22	3766	7.48087	0.0118261	0.0114735	0.914698	0.995634	0	0.108498	0.960448	0.327074	0.51893	0	-0.0477008	0.185978	0.666285	0.81153	0
G1	_	SPAC10F6.03c	SPAC10F6.03c_G1	cts1	2139	8.91114	0.0787856	0.431035	0.511481	0.995634	0	0.212345	3.11748	0.0774566	0.193626	0	0.128465	1.14354	0.284905	0.493376	0
G1	_	SPAC10F6.04	SPAC10F6.04_G1	ats1	2822	5.97205	0.226391	2.20473	0.137588	0.903355	0	0.336325	4.82034	0.0281258	0.0904848	0	0.260526	2.92409	0.0872664	0.22759	0
G1	_	SPAC10F6.05c	SPAC10F6.05c_G1	ubc6	2156	6.74414	0.0922048	0.671801	0.412425	0.993772	0	-0.0366306	0.103205	0.748017	0.858008	0	-0.051294	0.205293	0.650482	0.800584	0
G1	_	SPAC13C5.07	SPAC13C5.07_G1	mre11	4605	7.4823	0.0527901	0.310682	0.577262	0.995634	0	0.246251	6.74165	0.00941876	0.0387065	1	0.166203	3.08063	0.0792297	0.213104	0
G1	_	SPAC10F6.07c	SPAC10F6.07c_G1	mug94	567	4.19776	-0.168144	1.0232	0.31176	0.973112	0	0.0349525	0.0440004	0.833853	0.906148	0	-0.0757516	0.21098	0.646	0.798048	0
G1	_	SPAC10F6.08c	SPAC10F6.08c_G1	nht1	1076	6.21158	-0.0848746	0.581868	0.445581	0.995634	0	0.110449	0.983297	0.321386	0.512631	0	-0.000239162	4.64135e-06	0.998281	0.999078	0
G1	_	SPAC10F6.09c	SPAC10F6.09c_G1	psm3	3851	8.44312	0.00763569	0.00564451	0.940111	0.995634	0	-0.0110258	0.0116914	0.913895	0.955519	0	-0.0500692	0.242126	0.622675	0.782011	0
G1	_	SPAC13G6.09	SPAC13G6.09_G1	trs402	1611	6.76287	-0.00508093	0.00311749	0.955474	0.995634	0	0.233169	6.57005	0.0103709	0.0418401	1	0.196631	4.75465	0.0292192	0.106093	0
G1	_	SPAC10F6.10	SPAC10F6.10_G1	rio1	1715	5.70573	0.0139566	0.0113219	0.915262	0.995634	0	0.411357	10.03	0.00154009	0.00890706	1	0.221723	2.91111	0.0879715	0.228346	0
G1	_	SPAC10F6.11c	SPAC10F6.11c_G1	atg17	2805	6.37965	0.135755	1.55091	0.213001	0.934145	0	-0.460762	16.4998	4.86541e-05	0.000473895	-1	-0.378112	11.4691	0.000707613	0.00564919	-1
G1	_	SPAC10F6.12c	SPAC10F6.12c_G1	mam4	1267	7.36696	-0.035637	0.0632775	0.801389	0.995634	0	0.131852	0.865369	0.352241	0.54271	0	0.169914	1.44371	0.22954	0.43292	0
G1	_	SPAC10F6.13c	SPAC10F6.13c_G1	caa1	1516	8.1604	0.147298	2.30422	0.129023	0.889217	0	-0.30967	9.93262	0.00162375	0.00926782	-1	-0.362348	13.6564	0.000219491	0.00210008	-1
G1	_	SPAC10F6.14c	SPAC10F6.14c_G1		1815	7.04306	0.0944539	0.909797	0.340168	0.983844	0	-0.136726	1.84346	0.174546	0.340964	0	-0.201909	4.05533	0.044032	0.141585	0
G1	_	SPAC10F6.15	SPAC10F6.15_G1		1435	2.21399	0.513661	2.17801	0.139995	0.905888	0	0.531263	2.23675	0.134764	0.286294	0	0.635138	3.41823	0.0644802	0.184942	0
G1	_	SPAC10F6.16	SPAC10F6.16_G1	igo1	1181	8.16093	0.00635005	0.0038897	0.95027	0.995634	0	-0.667137	41.3599	1.26628e-10	3.98783e-09	-1	-0.641794	38.5834	5.24627e-10	1.83678e-08	-1
G1	_	SPAC10F6.17c	SPAC10F6.17c_G1		2000	6.64596	-0.0438885	0.200898	0.653997	0.995634	0	-0.201064	4.05125	0.0441387	0.126252	0	-0.0847243	0.743478	0.388549	0.594346	0
G1	_	SPAC110.01	SPAC110.01_G1	ppk1	5993	6.3303	-0.412927	5.07248	0.0243086	0.549972	0	-0.0472092	0.0670549	0.795674	0.8843	0	-0.081143	0.197193	0.656996	0.804716	0
G1	_	SPAC110.02	SPAC110.02_G1	pds5	4062	6.50822	-0.113229	1.11325	0.291376	0.970725	0	0.0304865	0.0801482	0.777097	0.873868	0	0.0475095	0.198753	0.655729	0.804356	0
G1	_	SPAC110.03	SPAC110.03_G1	cdc42	1010	8.65258	-0.0375737	0.117095	0.732207	0.995634	0	0.127246	1.33764	0.24745	0.430172	0	0.170115	2.40533	0.120923	0.280364	0
G1	_	SPAC110.04c	SPAC110.04c_G1	pss1	2696	9.42625	-0.284015	3.03737	0.0813677	0.793752	0	-0.210493	1.67313	0.19584	0.367354	0	-0.302444	3.43393	0.06387	0.183747	0
G1	_	SPAC110.05	SPAC110.05_G1		1915	3.2675	-0.0510884	0.0606442	0.805481	0.995634	0	-0.161338	0.559419	0.454494	0.636922	0	-0.0652675	0.0990708	0.752948	0.865662	0
G1	_	SPAC1142.01	SPAC1142.01_G1	rqc1	2306	7.57079	0.0887146	0.883212	0.347323	0.983844	0	0.196953	4.32514	0.0375534	0.111804	0	0.0870441	0.847602	0.357231	0.565346	0
G1	_	SPAC1142.02c	SPAC1142.02c_G1	sgt2	1260	6.85047	0.125453	1.69405	0.193068	0.920373	0	-0.133272	1.83434	0.175615	0.341795	0	-0.153884	2.48036	0.115276	0.270936	0
G1	_	SPAC1142.03c	SPAC1142.03c_G1	swi2	2490	6.4603	0.0447988	0.172859	0.677583	0.995634	0	0.162822	2.25926	0.132818	0.283407	0	0.146339	1.85656	0.173023	0.357277	0
G1	_	SPAC1142.04	SPAC1142.04_G1	noc201	2376	7.75774	0.052288	0.231556	0.630372	0.995634	0	0.68429	40.0014	2.53775e-10	7.57338e-09	1	0.567458	27.5656	1.51859e-07	3.18294e-06	1
G1	_	SPAC1142.05	SPAC1142.05_G1	ctr5	1280	7.55548	-0.0960451	0.196484	0.657574	0.995634	0	0.355694	2.70637	0.0999483	0.233114	0	0.0897659	0.17234	0.67804	0.819735	0
G1	_	SPAC13G7.08c	SPAC13G7.08c_G1	crb3	1538	7.01518	0.122235	1.70316	0.191875	0.920373	0	0.260043	7.64908	0.00568012	0.025702	1	0.190876	4.15716	0.0414589	0.135749	0
G1	_	SPAC1142.06	SPAC1142.06_G1	get3	1706	7.03529	-0.107844	1.09528	0.295305	0.970725	0	-0.228823	4.81173	0.0282666	0.0907514	0	-0.157612	2.32521	0.127293	0.289878	0
G1	_	SPAC1142.07c	SPAC1142.07c_G1	vps32	1147	6.46107	0.0553305	0.288392	0.591253	0.995634	0	0.317209	9.51648	0.00203635	0.0112143	1	0.147628	2.0663	0.150587	0.325423	0
G1	_	SPAC1142.08	SPAC1142.08_G1	fhl1	2479	5.55095	-0.101645	0.556088	0.455841	0.995634	0	-0.316711	5.11964	0.0236566	0.0794086	0	-0.0487531	0.128394	0.720103	0.847889	0
G1	_	SPAC11D3.01c	SPAC11D3.01c_G1		464	6.64664	0.398961	1.56727	0.210604	0.932066	0	-1.76702	27.5858	1.50277e-07	2.70628e-06	-1	-1.52333	20.9361	4.74849e-06	7.11933e-05	-1
T0	_	SPBPB21E7.04c	SPBPB21E7.04c_T0	cmt2	1134	4.41429	1.03941	11.8861	0.000565535	0.0343245	1	1.93476	43.5704	4.08976e-11	6.65163e-09	1	2.68421	86.0903	1.719e-20	6.44518e-18	1
G1	_	SPAC11D3.02c	SPAC11D3.02c_G1		627	7.98102	0.25935	5.72268	0.0167471	0.495947	0	-0.944143	71.3871	2.93578e-17	2.27143e-15	-1	-0.896939	64.9644	7.6262e-16	6.54704e-14	-1
G1	_	SPMITTRNAILE.02	SPMITTRNAILE.02_G1		72	7.33478	-0.453341	18.302	1.88508e-05	0.00908755	-1	-0.965267	78.6591	7.38061e-19	7.11604e-17	-1	-0.893512	68.5257	1.25232e-16	1.17139e-14	-1
G1	_	SPAC11D3.03c	SPAC11D3.03c_G1		1501	3.07958	0.0349013	0.0221188	0.881771	0.995634	0	0.0683746	0.0813391	0.775491	0.873089	0	0.0632838	0.0728366	0.787251	0.885935	0
G1	_	SPAPB24D3.01	SPAPB24D3.01_G1	toe3	3037	6.30462	-0.438749	14.034	0.000179533	0.0432743	-1	-0.095281	0.671023	0.412695	0.599805	0	-0.0810016	0.494527	0.481915	0.673542	0
G1	_	SPAC11D3.04c	SPAC11D3.04c_G1		1865	5.91658	0.099831	0.800108	0.371061	0.991043	0	0.207469	3.40285	0.0650837	0.169667	0	0.289186	6.85258	0.00885132	0.0429676	1
G1	_	SPAC11D3.05	SPAC11D3.05_G1	mfs2	2013	5.08859	0.0117689	0.00333364	0.953958	0.995634	0	0.239843	1.37708	0.2406	0.423194	0	0.184782	0.811169	0.367775	0.576012	0
G1	_	SPAC11D3.06	SPAC11D3.06_G1		1859	4.56086	0.00014752	7.16952e-07	0.999324	0.999966	0	-0.0600793	0.115006	0.734515	0.848049	0	0.0877114	0.256625	0.612448	0.772742	0
G1	_	SPAC144.08	SPAC144.08_G1	jac1	2869	6.32451	0.176941	2.80649	0.0938838	0.819925	0	0.284771	7.17597	0.00738863	0.0319342	1	0.325853	9.63462	0.00190944	0.0127574	1
G1	_	SPAC11D3.07c	SPAC11D3.07c_G1	toe4	4256	6.24247	0.0111804	0.00958289	0.922018	0.995634	0	-0.166763	2.05074	0.152132	0.310496	0	-0.155629	1.82099	0.177195	0.363259	0
G1	_	SPAC11D3.08c	SPAC11D3.08c_G1		3465	5.39893	-0.0306079	0.0377118	0.846023	0.995634	0	-0.239898	2.22174	0.13608	0.288112	0	0.0285364	0.0327224	0.856451	0.923977	0
G1	_	SPAC11D3.09	SPAC11D3.09_G1		1930	2.20238	0.280926	1.06431	0.302234	0.970858	0	-1.15601	11.8422	0.000579047	0.00400982	-1	-0.832707	7.17776	0.00738126	0.0373147	-1
G1	_	SPAC11D3.10	SPAC11D3.10_G1		4147	4.59531	-0.0542504	0.101456	0.75009	0.995634	0	-0.368621	4.32289	0.037603	0.111898	0	0.0576634	0.115734	0.733708	0.85531	0
G1	_	SPAC11D3.11c	SPAC11D3.11c_G1		2279	5.90508	0.141827	1.29704	0.254755	0.951104	0	-0.185853	2.10605	0.146718	0.303259	0	-0.149936	1.40585	0.235746	0.439839	0
G1	_	SPAC1486.10	SPAC1486.10_G1	thi1	2687	7.31275	0.065225	0.455381	0.499791	0.995634	0	0.279858	8.36975	0.00381518	0.0186328	1	0.160547	2.76909	0.0961009	0.241292	0
G1	_	SPAC11D3.13	SPAC11D3.13_G1	hsp3104	1121	8.66296	0.212418	4.41137	0.0357001	0.611278	0	-0.487237	22.6541	1.93948e-06	2.71917e-05	-1	-0.666573	42.3218	7.74253e-11	3.0906e-09	-1
G1	_	SPAC14C4.05c	SPAC14C4.05c_G1	man1	3233	6.40647	-0.112789	1.38185	0.239786	0.947728	0	-0.285097	8.4019	0.00374828	0.0183663	-1	-0.256624	7.02145	0.00805392	0.0401068	-1
G1	_	SPAC11D3.14c	SPAC11D3.14c_G1		4547	5.90474	0.299411	4.78977	0.0286292	0.584428	0	0.434356	10.0094	0.00155747	0.00895472	1	0.78373	33.9183	5.74741e-09	1.65986e-07	1
G1	_	SPAC1565.05	SPAC1565.05_G1	utp8	2663	7.52875	0.067618	0.457994	0.498563	0.995634	0	0.252903	6.39217	0.0114625	0.0451269	1	0.247899	6.18909	0.012854	0.0568898	0
G1	_	SPAC15A10.03c	SPAC15A10.03c_G1	rad54	2909	7.11137	-0.072931	0.503696	0.477881	0.995634	0	-0.266232	6.51047	0.0107241	0.0428623	-1	-0.219996	4.52421	0.0334185	0.116806	0
G1	_	SPAC11D3.15	SPAC11D3.15_G1		4227	7.17673	0.0167919	0.03139	0.859373	0.995634	0	0.0539305	0.319244	0.572062	0.733602	0	0.111008	1.37532	0.240901	0.446136	0
G1	_	SPAC15E1.09	SPAC15E1.09_G1	grx2	886	6.35516	0.188654	3.20238	0.0735311	0.778516	0	0.350191	10.9506	0.000935737	0.00603319	1	0.364284	12.1366	0.00049442	0.00419855	1
G1	_	SPAC11D3.16c	SPAC11D3.16c_G1		1273	5.74938	0.142911	1.75975	0.184656	0.919597	0	-0.0854249	0.585979	0.443978	0.628017	0	-0.0397295	0.132112	0.716252	0.844864	0
G1	_	SPAC11D3.17	SPAC11D3.17_G1		3522	5.2645	0.123082	0.441792	0.506259	0.995634	0	-0.402721	4.44272	0.0350504	0.106428	0	-0.163667	0.761772	0.382774	0.589397	0
G1	_	SPAC1687.09	SPAC1687.09_G1	irs4	4836	7.21033	-0.253874	4.93339	0.0263425	0.568297	0	-0.310678	7.27296	0.00700004	0.0304436	-1	-0.189672	2.76159	0.0965524	0.242054	0
G1	_	SPAC11D3.18c			2075	3.50189	-0.345728	3.03593	0.0814397	0.793752	0	-0.623297	8.82777	0.00296681	0.0152402	-1	-0.400064	4.0251	0.044828	0.143409	0
G1	_	SPAC1687.19c	SPAC1687.19c_G1	qtr1	1424	6.7023	0.121389	1.54195	0.214327	0.934145	0	0.317932	10.5622	0.00115421	0.00715473	1	0.314895	10.5286	0.00117539	0.0085953	1
G1	_	SPAC11D3.19	SPAC11D3.19_G1		1469	3.12677	0.362306	3.05888	0.0802972	0.793125	0	-0.797649	10.6778	0.00108428	0.00681565	-1	-0.382131	2.89789	0.0886957	0.228953	0
G1	_	SPMITTRNATYR.01	SPMITTRNATYR.01_G1		86	8.27325	-0.534703	22.8903	1.71517e-06	0.00204586	-1	-0.889002	61.6212	4.16313e-15	2.46135e-13	-1	-0.753379	44.8247	2.15491e-11	9.44392e-10	-1
G1	_	SPAC11E3.01c	SPAC11E3.01c_G1	swr1	4026	6.92706	-0.0788028	0.597192	0.439651	0.995634	0	0.170447	2.79693	0.0944452	0.223776	0	0.0966458	0.908392	0.340542	0.549054	0
G1	_	SPAC11E3.02c	SPAC11E3.02c_G1	ync13	4082	7.10928	-0.114189	1.45151	0.228286	0.947294	0	-0.00352866	0.00137236	0.970449	0.98682	0	-0.0286752	0.0920122	0.761635	0.869951	0
G1	_	SPAC11E3.03	SPAC11E3.03_G1	csm1	1098	5.37384	-0.286558	4.59106	0.0321391	0.607239	0	0.165959	1.59	0.207327	0.382368	0	0.184056	2.01414	0.15584	0.333099	0
G1	_	SPAC11E3.04c	SPAC11E3.04c_G1	ubc13	707	6.72219	0.0135763	0.0207844	0.885368	0.995634	0	0.0876185	0.851646	0.356087	0.546291	0	0.11068	1.39047	0.238325	0.443201	0
G1	_	SPAC11E3.05	SPAC11E3.05_G1	sea3	4314	7.49354	0.0509713	0.239543	0.624536	0.995634	0	-0.129297	1.51155	0.218902	0.396607	0	0.0658448	0.399898	0.527142	0.708623	0
G1	_	SPAC11E3.06	SPAC11E3.06_G1	map1	1751	5.61945	-0.00749523	0.00390674	0.950162	0.995634	0	0.215331	3.21816	0.0728253	0.184701	0	-0.0598897	0.247077	0.619141	0.778992	0
G1	_	SPAC11E3.07	SPAC11E3.07_G1	vma4	1424	8.07333	0.0474505	0.189187	0.663595	0.995634	0	0.12685	1.34364	0.246392	0.429328	0	0.188943	2.99862	0.0833356	0.220699	0
G1	_	SPAC11E3.08c	SPAC11E3.08c_G1	nse6	1746	5.25901	0.292945	3.89921	0.0483089	0.66393	0	0.619992	17.6428	2.66518e-05	0.000283097	1	0.356612	5.79911	0.0160343	0.0674191	0
G1	_	SPAC11E3.09	SPAC11E3.09_G1	pyp3	1429	6.61257	-0.113445	0.886233	0.3465	0.983844	0	0.265447	4.90238	0.0268197	0.087178	0	0.128617	1.15489	0.282527	0.491696	0
G1	_	SPAC11E3.10	SPAC11E3.10_G1		915	6.62543	0.00690488	0.00572715	0.939675	0.995634	0	-0.155193	2.75428	0.0969943	0.228263	0	0.0475886	0.272376	0.601743	0.764003	0
G1	_	SPAC11E3.11c	SPAC11E3.11c_G1	syt22	3506	6.17366	-0.0462563	0.131266	0.717123	0.995634	0	-0.263439	4.08993	0.0431395	0.124187	0	-0.0770881	0.362524	0.547108	0.722902	0
G1	_	SPAC11E3.12	SPAC11E3.12_G1		2837	5.83214	-0.0334853	0.0839777	0.771978	0.995634	0	0.0543167	0.216791	0.641496	0.785667	0	0.102208	0.792461	0.373357	0.580603	0
G1	_	SPAC11E3.13c	SPAC11E3.13c_G1	gas5	2322	6.41096	-0.376607	7.43193	0.00640767	0.340012	0	-0.0944082	0.468696	0.493588	0.671875	0	0.0587148	0.18483	0.667255	0.812054	0
G1	_	SPAC11E3.14	SPAC11E3.14_G1		3019	6.98325	0.104209	1.01818	0.31295	0.973112	0	0.00994869	0.00906792	0.924136	0.961254	0	-0.0284524	0.075	0.784191	0.884214	0
G1	_	SPAC11E3.15	SPAC11E3.15_G1	rpl22	550	10.8048	0.0808573	0.469955	0.493008	0.995634	0	0.122274	1.07217	0.300455	0.48819	0	0.191894	2.63866	0.104291	0.255509	0
G1	_	SPAC11G7.01	SPAC11G7.01_G1	mtl2	3188	6.80942	-0.262241	6.84729	0.00887759	0.374231	0	-0.207662	4.22677	0.0397912	0.116795	0	-0.0316223	0.101448	0.750099	0.864499	0
G1	_	SPAC11G7.02	SPAC11G7.02_G1	pub1	2871	7.13254	-0.0935887	0.70445	0.401292	0.991347	0	-0.379385	11.2232	0.000807823	0.00531788	-1	-0.302261	7.23911	0.00713322	0.0363151	-1
G1	_	SPAC11G7.03	SPAC11G7.03_G1	idh1	1393	6.94135	0.0378134	0.0950789	0.757817	0.995634	0	0.0106913	0.0075017	0.93098	0.963969	0	-0.0553775	0.201881	0.653206	0.802665	0
G1	_	SPAC11G7.04	SPAC11G7.04_G1	ubi1	627	9.58014	0.125082	1.70327	0.191861	0.920373	0	0.203669	4.50497	0.0337965	0.10352	0	0.163095	2.89513	0.0888477	0.228953	0
G1	_	SPAC11G7.05c	SPAC11G7.05c_G1	mct1	1929	5.09839	-0.209359	2.73175	0.0983712	0.833431	0	-0.272612	4.40112	0.0359154	0.108212	0	-0.271104	4.52769	0.0333506	0.11676	0
G1	_	SPAC11G7.06c	SPAC11G7.06c_G1	mug132	3136	5.1249	-0.114477	0.534231	0.464833	0.995634	0	0.0556777	0.1256	0.723038	0.84015	0	0.0491061	0.0995693	0.752347	0.865289	0
G1	_	SPAC11H11.01	SPAC11H11.01_G1	sst6	1714	5.28986	0.163194	1.65784	0.197896	0.926915	0	0.276487	4.68447	0.0304364	0.0957452	0	0.075364	0.347766	0.55538	0.728951	0
G1	_	SPAC11H11.02c	SPAC11H11.02c_G1	mug162	2910	5.80615	-0.151296	1.22811	0.267775	0.956502	0	-0.410644	8.65594	0.00325996	0.0163966	-1	-0.427509	9.53198	0.00201923	0.0132925	-1
G1	_	SPAC11H11.03c	SPAC11H11.03c_G1		817	6.04082	-0.0104378	0.00827573	0.927516	0.995634	0	0.749182	45.4662	1.55296e-11	5.72493e-10	1	0.508088	20.8391	4.99525e-06	7.40076e-05	1
G1	_	SPAC11H11.04	SPAC11H11.04_G1	mam2	1699	7.18969	0.0982976	0.101566	0.749958	0.995634	0	0.207498	0.458265	0.498436	0.676394	0	-0.0052016	0.00028806	0.986459	0.993114	0
G1	_	SPAC11H11.05c	SPAC11H11.05c_G1	fta6	180	3.2663	0.311866	1.55731	0.21206	0.933928	0	0.466496	3.43729	0.0637403	0.167348	0	0.600742	6.05945	0.0138321	0.0600732	0
G1	_	SPAC11H11.06	SPAC11H11.06_G1	arp2	1709	8.71248	0.0912905	1.01128	0.314596	0.973112	0	-0.0151408	0.02758	0.8681	0.927285	0	-0.0156111	0.0294534	0.863736	0.928161	0
G1	_	SPAC1250.01	SPAC1250.01_G1	snf21	4006	6.50766	0.00377097	0.00123993	0.97191	0.997087	0	0.12063	1.25292	0.262995	0.447512	0	0.0860192	0.647436	0.421031	0.623488	0
G1	_	SPAC1250.02	SPAC1250.02_G1	mug95	837	2.92724	0.174689	0.373931	0.540869	0.995634	0	-0.0404596	0.0186913	0.891255	0.941557	0	-0.0542489	0.0347605	0.852098	0.921342	0
G1	_	SPAC1250.03	SPAC1250.03_G1	ubc14	965	5.17769	0.0338085	0.0446701	0.832612	0.995634	0	0.0295773	0.0333067	0.855189	0.918662	0	0.1041	0.42599	0.513963	0.698397	0
G1	_	SPAC1250.04c	SPAC1250.04c_G1	atl1	890	4.0804	-0.128167	0.493842	0.482218	0.995634	0	0.300118	2.82623	0.0927359	0.220895	0	0.389795	5.02692	0.0249562	0.0947882	0
G1	_	SPAC1250.05	SPAC1250.05_G1	rpl3002	607	7.31457	-0.0495077	0.142923	0.705392	0.995634	0	0.127627	0.944968	0.331004	0.522782	0	0.0311092	0.0565075	0.812104	0.899515	0
G1	_	SPAC1296.01c	SPAC1296.01c_G1		2146	7.84664	0.0282011	0.0763325	0.78233	0.995634	0	-0.111612	1.17834	0.277693	0.46272	0	-0.114607	1.25042	0.263472	0.471267	0
G1	_	SPAC16A10.08c	SPAC16A10.08c_G1	mug74	1123	4.71153	0.304302	3.80869	0.0509872	0.681315	0	0.476962	9.27481	0.00232327	0.0125447	1	0.237041	2.28276	0.130819	0.295545	0
G1	_	SPAC1296.03c	SPAC1296.03c_G1	sxa2	1854	4.94037	-0.0769853	0.210621	0.646281	0.995634	0	-0.366341	4.50831	0.0337305	0.103419	0	-0.278578	2.69401	0.100726	0.249057	0
G1	_	SPAC1296.04	SPAC1296.04_G1	mug65	1207	4.65626	-0.0315036	0.0441334	0.833606	0.995634	0	-0.0323504	0.044755	0.832455	0.9051	0	0.0333922	0.0500511	0.822974	0.905315	0
G1	_	SPAC1296.05c	SPAC1296.05c_G1	lcp1	1207	6.4722	0.182645	3.61671	0.0572018	0.710752	0	0.196032	4.05907	0.0439347	0.125921	0	0.337912	12.5564	0.000394845	0.00347053	1
G1	_	SPAC1296.06	SPAC1296.06_G1	tah18	1961	6.53442	0.0998057	0.587131	0.443531	0.995634	0	0.196562	2.25773	0.132948	0.28359	0	-0.0338408	0.0666925	0.796215	0.891314	0
G1	_	SPAC12B10.01c	SPAC12B10.01c_G1		5352	8.43463	0.00232566	0.0004405	0.983255	0.9991	0	-0.104231	0.877791	0.348808	0.538949	0	-0.0971863	0.766897	0.381179	0.587951	0
G1	_	SPAC12B10.02c	SPAC12B10.02c_G1	pho86	816	6.68563	0.00329637	0.00121702	0.972171	0.997087	0	-0.0695058	0.524114	0.469092	0.649679	0	-0.0209655	0.0490417	0.824739	0.906597	0
G1	_	SPAC12B10.03	SPAC12B10.03_G1	bun62	2559	6.4336	0.0525933	0.298156	0.585041	0.995634	0	0.165065	2.89467	0.0888728	0.214713	0	0.191628	4.01073	0.0452114	0.144193	0
G1	_	SPAC1782.01	SPAC1782.01_G1	ecm29	5365	8.44794	-0.0592092	0.362907	0.546896	0.995634	0	-0.303935	9.4124	0.00215523	0.0117612	-1	-0.235826	5.71716	0.0167999	0.0698639	0
G1	_	SPAC1782.10c	SPAC1782.10c_G1	nhp2	1216	8.19487	0.0302119	0.0838461	0.772151	0.995634	0	0.281319	7.26362	0.00703653	0.0305599	1	0.16256	2.42782	0.119198	0.277804	0
G1	_	SPAC12B10.05	SPAC12B10.05_G1	icp55	1718	6.20764	0.00215438	0.000301472	0.986147	0.9991	0	0.487748	15.7452	7.24697e-05	0.000672841	1	0.231938	3.53918	0.059935	0.176344	0
G1	_	SPNCRNA.1626	SPNCRNA.1626_G1		5113	8.75977	-0.701102	25.6912	4.00655e-07	0.000627726	-1	-1.00514	51.6994	6.46837e-13	2.87498e-11	-1	-1.07113	59.0234	1.5581e-14	1.16426e-12	-1
G1	_	SPAC12B10.06c	SPAC12B10.06c_G1	emi5	698	6.32095	0.17515	1.95611	0.16193	0.919597	0	0.124506	0.966717	0.3255	0.517875	0	0.276145	4.85775	0.0275221	0.101543	0
G1	_	SPAC12B10.07	SPAC12B10.07_G1	acp1	1962	7.64418	-0.0421823	0.130767	0.717638	0.995634	0	-0.0572958	0.23846	0.62532	0.773718	0	-0.0148162	0.0160879	0.899069	0.947765	0
G1	_	SPAC17A2.05	SPAC17A2.05_G1	osm1	2109	7.38675	-0.0774679	0.432215	0.510904	0.995634	0	-0.330926	7.72787	0.00543749	0.0248192	-1	-0.223877	3.57905	0.0585127	0.17301	0
G1	_	SPAC17A5.16	SPAC17A5.16_G1	ftp105	3500	6.9546	-0.173798	2.68334	0.101403	0.845068	0	-0.31734	8.70362	0.00317578	0.0161024	-1	-0.103209	0.949506	0.329845	0.539278	0
G1	_	SPAC12B10.08c	SPAC12B10.08c_G1	til1	2352	5.11641	0.0493199	0.138125	0.710152	0.995634	0	0.637191	24.6359	6.92506e-07	1.0877e-05	1	0.477907	13.9689	0.000185859	0.00181996	1
G1	_	SPAC12B10.09	SPAC12B10.09_G1	pet801	1257	5.67983	0.111933	0.649963	0.420126	0.995634	0	0.0942321	0.450793	0.501959	0.679286	0	0.0628373	0.202673	0.652572	0.80221	0
G1	_	SPAC12B10.10	SPAC12B10.10_G1	nod1	1373	4.97935	-0.234795	2.61617	0.10578	0.853477	0	0.0668648	0.214697	0.643111	0.786568	0	0.049285	0.119805	0.729246	0.853443	0
G1	_	SPAC12B10.11	SPAC12B10.11_G1	exg2	1713	5.57992	-0.16473	1.87842	0.170514	0.919597	0	-0.0162504	0.0180752	0.893051	0.942575	0	-0.00131976	0.000123376	0.991138	0.994948	0
G1	_	SPAC12B10.12c	SPAC12B10.12c_G1	rhp41	2521	6.45489	0.181445	3.0833	0.0790998	0.789928	0	0.191607	3.36597	0.0665564	0.172235	0	0.0629338	0.36543	0.545506	0.721812	0
G1	_	SPAC12B10.13	SPAC12B10.13_G1	gid8	1039	5.5637	0.210135	2.1451	0.143025	0.907732	0	0.191995	1.74506	0.186499	0.356339	0	0.110797	0.587647	0.443331	0.642097	0
G1	_	SPAC12B10.14c	SPAC12B10.14c_G1	tea5	2099	6.14505	-0.107871	1.12139	0.289619	0.96975	0	0.146965	2.08877	0.148386	0.305753	0	0.102759	1.04476	0.306717	0.514782	0
G1	_	SPAC12B10.15c	SPAC12B10.15c_G1	rnh203	555	4.1678	-0.0293886	0.0337281	0.854286	0.995634	0	0.156451	0.946552	0.330598	0.522537	0	0.165488	1.11646	0.290682	0.49856	0
G1	_	SPAC12B10.16c	SPAC12B10.16c_G1	mug157	2036	7.51097	0.102062	0.920208	0.33742	0.982694	0	-0.0301235	0.0790279	0.778619	0.874401	0	-0.0790369	0.547577	0.459309	0.653757	0
G1	_	SPAC12G12.01c	SPAC12G12.01c_G1	sea4	3357	7.74218	0.0170159	0.0339199	0.853877	0.995634	0	-0.0459032	0.243135	0.621951	0.771957	0	-0.0394638	0.181603	0.669999	0.814025	0
G1	_	SPAC12G12.02	SPAC12G12.02_G1	efg1	2274	6.25602	0.159411	1.90687	0.167312	0.919597	0	0.693954	37.1163	1.11288e-09	2.97146e-08	1	0.43939	14.7947	0.00011987	0.00124581	1
G1	_	SPAC1805.12c	SPAC1805.12c_G1	ubi2	745	9.56978	0.143722	2.52384	0.112138	0.862289	0	0.270255	8.89936	0.0028527	0.0148118	1	0.136263	2.26472	0.132351	0.297504	0
G1	_	SPAC12G12.04	SPAC12G12.04_G1	mcp60	2315	10.3242	0.0681111	0.340723	0.559412	0.995634	0	-0.526611	20.1409	7.19428e-06	8.91038e-05	-1	-0.494579	17.7761	2.48491e-05	0.000311459	-1
G1	_	SPAC12G12.05c	SPAC12G12.05c_G1	taf9	1478	6.57649	0.0698743	0.354326	0.551675	0.995634	0	0.345243	8.66428	0.00324508	0.016348	1	0.466953	16.1723	5.78332e-05	0.000665029	1
G1	_	SPAC12G12.06c	SPAC12G12.06c_G1	rcl1	1850	7.49182	0.0141675	0.0161041	0.899018	0.995634	0	0.0127488	0.0128773	0.909651	0.952679	0	0.103255	0.854725	0.355219	0.56388	0
G1	_	SPAC12G12.07c	SPAC12G12.07c_G1		1470	8.1478	-0.0985	1.00673	0.315688	0.973112	0	-0.250291	6.4106	0.0113441	0.0448822	-1	-0.382675	14.9684	0.000109329	0.00115347	-1
G1	_	SPAC12G12.08	SPAC12G12.08_G1	mrpl6	1444	6.56877	-0.0219681	0.0517728	0.820007	0.995634	0	0.0304722	0.0977035	0.754603	0.861559	0	-0.021008	0.0471272	0.82814	0.908031	0
G1	_	SPAC12G12.09	SPAC12G12.09_G1	eti1	3007	6.9845	0.0482689	0.168917	0.681076	0.995634	0	0.047571	0.161913	0.687402	0.816517	0	0.016454	0.0195583	0.888778	0.941058	0
G1	_	SPAC12G12.10	SPAC12G12.10_G1	wdr21	1350	7.11317	0.0783561	0.704844	0.401161	0.991347	0	0.103454	1.20948	0.271434	0.45642	0	0.0598494	0.409672	0.522136	0.703883	0
G1	_	SPAC12G12.11c	SPAC12G12.11c_G1	miy1	1492	5.37026	-0.139587	0.863988	0.352625	0.983969	0	0.0800052	0.284638	0.593677	0.750267	0	0.180719	1.50249	0.220288	0.420642	0
G1	_	SPAC12G12.12	SPAC12G12.12_G1	gms2	1364	6.94494	0.130127	1.53362	0.21557	0.934145	0	-0.228944	4.55509	0.032821	0.101275	0	-0.293115	7.55623	0.0059803	0.0313891	-1
G1	_	SPAC12G12.13c	SPAC12G12.13c_G1	cid14	2366	7.40886	-0.0193757	0.0427692	0.836161	0.995634	0	0.275674	8.69137	0.0031972	0.0161852	1	0.267966	8.29976	0.00396502	0.0229232	1
G1	_	SPAC12G12.14c	SPAC12G12.14c_G1	pfs2	2011	5.85766	-0.136157	1.77888	0.182287	0.919597	0	-0.037821	0.134321	0.713993	0.835085	0	0.113188	1.27586	0.25867	0.465918	0
G1	_	SPAC12G12.15	SPAC12G12.15_G1	sif3	2098	4.83759	0.0665291	0.233784	0.628732	0.995634	0	0.243057	3.09512	0.0785274	0.195445	0	0.263025	3.78473	0.0517224	0.158508	0
G1	_	SPAC12G12.16c	SPAC12G12.16c_G1		2192	6.3332	-0.0115911	0.00665379	0.934988	0.995634	0	-0.0625622	0.190617	0.662404	0.798453	0	-0.00551784	0.00149404	0.969167	0.982652	0
G1	_	SPAC12G12.17	SPAC12G12.17_G1	nce101	690	4.62225	0.172186	1.24392	0.264717	0.954461	0	0.144523	0.843534	0.358388	0.54888	0	-0.102319	0.420488	0.516694	0.699831	0
G1	_	SPAC1327.01c	SPAC1327.01c_G1		3596	6.28205	0.00446874	0.0018992	0.965239	0.995634	0	0.144227	1.95826	0.161699	0.323418	0	0.247096	5.96076	0.0146278	0.0627101	0
G1	_	SPAC139.01c	SPAC139.01c_G1	mkt1	2828	7.0911	-0.140961	2.30823	0.12869	0.889217	0	-0.109036	1.3593	0.243659	0.42654	0	-0.0819902	0.783646	0.376028	0.582732	0
G1	_	SPAC1805.17	SPAC1805.17_G1	crm1	4102	8.31966	-0.200501	3.71275	0.0539985	0.695166	0	-0.360339	11.831	0.00058252	0.00402054	-1	-0.298018	8.16563	0.00426918	0.0242785	-1
G1	_	SPAC139.02c	SPAC139.02c_G1	oac1	1591	7.09019	0.12712	1.37299	0.241299	0.947728	0	-0.573327	26.3352	2.87003e-07	4.82211e-06	-1	-0.671381	36.3118	1.6814e-09	5.34889e-08	-1
G1	_	SPAC139.03	SPAC139.03_G1	toe2	2361	6.2752	-0.0425674	0.165087	0.684516	0.995634	0	-0.11903	1.24891	0.263761	0.448451	0	-0.285914	7.23598	0.00714569	0.036349	-1
G1	_	SPAC139.04c	SPAC139.04c_G1	fap2	1902	6.0788	0.147285	1.60675	0.204949	0.932066	0	0.210074	3.20946	0.0732137	0.185611	0	0.184459	2.51359	0.112868	0.267427	0
G1	_	SPAC139.05	SPAC139.05_G1		2183	3.63985	-0.173314	0.270093	0.603269	0.995634	0	-1.06999	9.35655	0.0022219	0.0120769	-1	-0.895559	6.76949	0.00927292	0.0442938	-1
G1	_	SPAC139.06	SPAC139.06_G1	hat1	1490	6.74895	-0.0672446	0.409893	0.522024	0.995634	0	0.00705947	0.0044562	0.946777	0.972697	0	-0.0136194	0.0168364	0.89676	0.946286	0
G1	_	SPAC1399.01c	SPAC1399.01c_G1		3157	5.5578	-0.287989	1.8544	0.173273	0.919597	0	-0.640365	8.7751	0.0030537	0.0155843	-1	-0.477387	5.00412	0.0252871	0.0954088	0
G1	_	SPAC1399.02	SPAC1399.02_G1		2694	5.80104	0.00489438	0.00201921	0.964159	0.995634	0	-0.252048	4.98941	0.0255028	0.0836787	0	-0.173798	2.47944	0.115343	0.270936	0
G1	_	SPAC1399.03	SPAC1399.03_G1	fur4	2088	6.05213	-0.144217	1.03396	0.30923	0.972867	0	-0.0488449	0.117221	0.732068	0.845847	0	-0.115699	0.663361	0.415376	0.618366	0
G1	_	SPAC1399.04c	SPAC1399.04c_G1	uck2	663	3.74223	-0.203519	0.847584	0.357237	0.983969	0	0.0109074	0.00241408	0.960813	0.981166	0	0.034485	0.0253046	0.87361	0.933171	0
G1	_	SPAC1399.05c	SPAC1399.05c_G1	toe1	1662	4.8204	0.210484	2.28441	0.13068	0.889217	0	0.101827	0.504326	0.477606	0.65697	0	0.139336	0.988818	0.320032	0.530097	0
G1	_	SPAC1399.06	SPAC1399.06_G1		2544	2.28153	-0.477647	2.66988	0.102264	0.845448	0	-0.262559	0.807993	0.368714	0.557744	0	-0.380614	1.72309	0.189295	0.380047	0
G1	_	SPAC13A11.01c	SPAC13A11.01c_G1	rga8	3621	7.71162	0.0159371	0.0285721	0.865771	0.995634	0	0.121248	1.64364	0.199826	0.372822	0	0.0394498	0.174982	0.675722	0.818467	0
G1	_	SPAC13A11.02c	SPAC13A11.02c_G1	erg11	2520	8.52702	0.023297	0.0307413	0.860819	0.995634	0	-0.0958297	0.516104	0.472508	0.652325	0	-0.108166	0.658081	0.417238	0.62018	0
G1	_	SPAC13A11.03	SPAC13A11.03_G1	mcp7	1463	7.0533	0.104107	0.326933	0.567471	0.995634	0	0.453527	6.13329	0.013266	0.0501134	0	0.502369	7.56102	0.00596443	0.031332	1
G1	_	SPAC13A11.04c	SPAC13A11.04c_G1	ubp8	1880	6.68956	0.0970426	0.92916	0.335081	0.982694	0	0.0634334	0.387487	0.533624	0.704759	0	-0.0876755	0.743654	0.388493	0.594346	0
G1	_	SPAC13A11.05	SPAC13A11.05_G1	ysp2	2130	7.49865	0.0865061	0.7593	0.383548	0.991043	0	-0.341042	11.3747	0.000744506	0.00496558	-1	-0.244692	5.95936	0.0146394	0.0627101	0
G1	_	SPAC13A11.06	SPAC13A11.06_G1	pdc202	2141	3.97025	0.0713779	0.143036	0.705281	0.995634	0	0.360858	3.70696	0.0541859	0.147345	0	0.569792	10.0073	0.00155923	0.0108333	1
G1	_	SPAC13C5.01c	SPAC13C5.01c_G1	pre9	1331	6.94353	-0.0857804	0.7359	0.390977	0.991043	0	0.130214	1.69483	0.192965	0.364691	0	0.177824	3.22992	0.0723042	0.200165	0
G1	_	SPAC13C5.02	SPAC13C5.02_G1	dre4	1708	6.39631	-0.0718325	0.37228	0.541764	0.995634	0	0.337431	8.34509	0.00386731	0.0188025	1	0.230759	3.91108	0.0479687	0.150385	0
G1	_	SPAC13C5.03	SPAC13C5.03_G1	tht1	2668	6.1857	0.0784848	0.475409	0.490509	0.995634	0	0.235324	4.24535	0.0393579	0.11591	0	-0.0283766	0.0612258	0.804569	0.896716	0
G1	_	SPAC13C5.04	SPAC13C5.04_G1		977	6.58489	-0.033607	0.0524343	0.81888	0.995634	0	-0.479606	10.2939	0.0013347	0.00801971	-1	-0.504878	11.4704	0.000707121	0.00564919	-1
G1	_	SPAC13C5.05c	SPAC13C5.05c_G1		1823	5.69401	-0.0552339	0.186255	0.666052	0.995634	0	-0.238943	3.32858	0.0680855	0.175078	0	-0.265932	4.20863	0.0402187	0.132919	0
G1	_	SPAC13C5.06c	SPAC13C5.06c_G1	mug121	1034	4.96097	-0.163117	1.34822	0.24559	0.947728	0	-0.000226147	2.62698e-06	0.998707	0.999209	0	-0.0871676	0.389332	0.532651	0.712729	0
G1	_	SPAC1834.11c	SPAC1834.11c_G1	sec18	3085	7.67719	-0.076844	0.567145	0.451396	0.995634	0	-0.292253	8.0334	0.00459226	0.0216878	-1	-0.211228	4.25422	0.0391529	0.130447	0
G1	_	SPAC13D6.01	SPAC13D6.01_G1	pof14	1632	5.22368	-0.102548	0.406222	0.523893	0.995634	0	0.353209	4.94665	0.0261413	0.0851938	0	0.193185	1.47804	0.224081	0.426068	0
G1	_	SPAC13D6.02c	SPAC13D6.02c_G1	byr3	1307	7.72422	0.0328327	0.0969319	0.755543	0.995634	0	0.158205	2.24187	0.134319	0.285638	0	0.032039	0.0920162	0.761629	0.869951	0
G1	_	SPAC13D6.03c	SPAC13D6.03c_G1	trm9	1442	5.74171	-0.0118305	0.0104313	0.91865	0.995634	0	0.199826	2.96938	0.0848545	0.207728	0	0.160879	1.96502	0.160978	0.34026	0
G1	_	SPAC13D6.04c	SPAC13D6.04c_G1	btb3	1826	6.6383	0.109996	1.09458	0.29546	0.970725	0	0.0226466	0.0452029	0.831631	0.904832	0	-0.107129	1.01797	0.313	0.522807	0
G1	_	SPAC13D6.05	SPAC13D6.05_G1	alp11	1082	6.27262	-0.109885	0.762955	0.382405	0.991043	0	-0.0832522	0.429857	0.512059	0.687021	0	-0.0545624	0.187973	0.664609	0.809702	0
G1	_	SPAC13F5.01c	SPAC13F5.01c_G1	msh1	3190	5.88239	-0.0599429	0.323874	0.569289	0.995634	0	-0.125198	1.35244	0.244852	0.427485	0	-0.0659529	0.391316	0.531608	0.71203	0
G1	_	SPAC13F5.02c	SPAC13F5.02c_G1	taf7	1346	5.3011	-0.164868	1.53085	0.215985	0.934145	0	0.116612	0.772684	0.379388	0.568629	0	0.0862811	0.43386	0.510101	0.695944	0
G1	_	SPAC13F5.03c	SPAC13F5.03c_G1	gld1	2410	4.56788	0.12482	0.140165	0.708117	0.995634	0	-0.138887	0.169273	0.680758	0.810862	0	0.115213	0.116332	0.733048	0.854912	0
G1	_	SPAC13F5.04c	SPAC13F5.04c_G1	vta1	1943	3.20371	-0.317076	1.72271	0.189345	0.920373	0	0.479074	4.50889	0.0337192	0.103419	0	0.578623	7.02625	0.00803233	0.0400467	1
G1	_	SPAC13F5.05	SPAC13F5.05_G1	mpd1	2333	6.29992	0.0216696	0.0248381	0.874771	0.995634	0	-0.215501	2.37241	0.123496	0.269006	0	-0.0353734	0.0658532	0.797473	0.891821	0
G1	_	SPAC13F5.06c	SPAC13F5.06c_G1	sec10	2698	6.78503	0.0399346	0.189375	0.663437	0.995634	0	0.0720231	0.60324	0.437345	0.62155	0	0.166668	3.32581	0.0682005	0.192441	0
G1	_	SPAC13F5.07c	SPAC13F5.07c_G1	hpz2	1148	3.73955	0.168261	0.533757	0.465032	0.995634	0	0.11003	0.219057	0.63976	0.784841	0	0.0935725	0.161254	0.688004	0.825867	0
G1	_	SPAC13G6.01c	SPAC13G6.01c_G1	rad8	4213	8.23449	-0.0403485	0.188526	0.664146	0.995634	0	-0.08491	0.826959	0.363153	0.55307	0	-0.140406	2.27187	0.13174	0.296578	0
G1	_	SPAC13G6.02c	SPAC13G6.02c_G1	rps101	1791	9.90404	0.103335	0.97052	0.324551	0.978335	0	-0.077246	0.539807	0.462513	0.643411	0	-0.0827965	0.621084	0.430645	0.63131	0
G1	_	SPAC13G6.03	SPAC13G6.03_G1	gpi7	4139	7.44586	0.0581678	0.351736	0.553132	0.995634	0	-0.197577	3.94607	0.0469811	0.132205	0	-0.0721946	0.537138	0.463621	0.658101	0
G1	_	SPAC13G6.04	SPAC13G6.04_G1	tim8	573	6.48507	0.0599314	0.310934	0.577107	0.995634	0	-0.337331	9.27267	0.00232599	0.0125447	-1	-0.271676	6.19137	0.0128375	0.0568568	0
G1	_	SPAC13G6.05c	SPAC13G6.05c_G1	trs33	996	5.47206	0.027412	0.0414328	0.838705	0.995634	0	0.24907	3.42077	0.064381	0.168416	0	0.318633	5.75629	0.0164297	0.068689	0
G1	_	SPAC13G6.06c	SPAC13G6.06c_G1	gcv2	4022	7.78884	-0.284427	5.15501	0.0231793	0.549972	0	-0.330315	6.86639	0.00878318	0.0364531	-1	-0.0369085	0.0870763	0.767927	0.872954	0
G1	_	SPAC13G6.07c	SPAC13G6.07c_G1	rps601	1370	8.67017	0.162212	1.77612	0.182626	0.919597	0	0.274981	5.07974	0.0242069	0.0806083	0	0.253424	4.32576	0.0375396	0.12662	0
G1	_	SPAC13G6.08	SPAC13G6.08_G1	fzr2	2331	3.21303	0.343215	2.10197	0.147109	0.908309	0	0.676679	8.39019	0.00377252	0.0184706	1	0.570017	6.06991	0.0137504	0.0598429	0
G1	_	SPAC19G12.10c	SPAC19G12.10c_G1	cpy1	3576	9.48458	-0.351157	7.86151	0.00504983	0.304301	0	-0.321109	6.55723	0.0104459	0.0420181	-1	-0.220949	3.11034	0.0777966	0.210151	0
G1	_	SPAC13G6.10c	SPAC13G6.10c_G1	asl1	2126	8.60533	-0.231904	4.26207	0.0389725	0.62634	0	-0.0960817	0.73166	0.392346	0.581559	0	0.119826	1.14537	0.28452	0.492991	0
G1	_	SPAC13G6.11c	SPAC13G6.11c_G1	erg12	1279	6.83114	-0.0301457	0.115343	0.734142	0.995634	0	-0.444281	23.3866	1.32497e-06	1.95379e-05	-1	-0.449555	24.4742	7.53097e-07	1.37199e-05	-1
G1	_	SPAC13G6.12c	SPAC13G6.12c_G1	chs1	3066	5.37911	-0.0253576	0.0440133	0.833829	0.995634	0	0.344433	8.33609	0.00388652	0.0188813	1	0.226321	3.66388	0.0556039	0.166812	0
G1	_	SPAC13G6.14	SPAC13G6.14_G1	aps1	1397	6.42493	0.0295394	0.0920974	0.761527	0.995634	0	-0.275367	7.50964	0.00613695	0.0273544	-1	-0.181436	3.37227	0.0663022	0.189043	0
G1	_	SPAC1A6.04c	SPAC1A6.04c_G1	plb1	3184	9.89391	-0.253688	4.80573	0.0283653	0.580933	0	-0.339898	8.58022	0.00339835	0.0169701	-1	-0.250648	4.68334	0.0304565	0.109319	0
G1	_	SPAC13G6.15c	SPAC13G6.15c_G1	rcn1	1618	4.67262	0.00663956	0.00253198	0.959868	0.995634	0	-0.69166	22.6197	1.97453e-06	2.76214e-05	-1	-0.324667	5.66969	0.0172605	0.0714474	0
G1	_	SPAC13G7.01c	SPAC13G7.01c_G1	erg7	2435	6.70871	-0.0558106	0.305862	0.580231	0.995634	0	0.103724	1.05119	0.305234	0.493871	0	-0.0417149	0.170703	0.679488	0.820735	0
G1	_	SPAC13G7.02c	SPAC13G7.02c_G1	ssa1	2402	9.94628	0.0190523	0.0327698	0.856348	0.995634	0	-1.04667	95.619	1.39265e-22	2.11351e-20	-1	-0.823565	59.9851	9.55766e-15	7.3948e-13	-1
G1	_	SPAC13G7.03	SPAC13G7.03_G1	upf3	1085	5.08082	0.189599	1.80219	0.179448	0.919597	0	0.320606	5.09459	0.0240006	0.0801306	0	0.140507	0.981626	0.321798	0.531832	0
G1	_	SPAC13G7.04c	SPAC13G7.04c_G1	mac1	3184	5.21389	-0.599718	10.645	0.00110371	0.150369	0	-0.00327673	0.000322057	0.985682	0.993001	0	0.0137971	0.00593967	0.938568	0.967277	0
G1	_	SPAC13G7.05	SPAC13G7.05_G1	are1	2224	5.52261	0.0479287	0.116041	0.733368	0.995634	0	-0.188416	1.70651	0.191438	0.362602	0	0.0161303	0.0130498	0.909051	0.952998	0
G1	_	SPAC13G7.06	SPAC13G7.06_G1	met16	1441	7.59478	0.142232	2.2298	0.135371	0.902226	0	-0.139074	2.07599	0.149633	0.307156	0	-0.193249	4.03139	0.0446612	0.143099	0
G1	_	SPAC13G7.07	SPAC13G7.07_G1	arb2	1208	5.66379	0.00919543	0.00429333	0.947757	0.995634	0	0.0448063	0.0999362	0.751906	0.860047	0	-0.0061696	0.00191494	0.965096	0.980745	0
G1	_	SPAC1B2.04	SPAC1B2.04_G1	cox6	988	6.74722	0.362506	12.9243	0.000324346	0.0615962	0	0.344889	11.4393	0.00071906	0.00481962	1	0.292291	8.32494	0.00391044	0.0226704	1
G1	_	SPAC13G7.09c	SPAC13G7.09c_G1		881	4.75612	0.0808795	0.280478	0.596388	0.995634	0	0.019758	0.0160186	0.899285	0.94656	0	-0.369871	5.47	0.0193456	0.0784211	0
G1	_	SPAC13G7.10	SPAC13G7.10_G1	teb1	1371	5.16587	-0.0482017	0.0839859	0.771967	0.995634	0	-0.390157	5.18404	0.0227953	0.0772205	0	-0.424598	6.27896	0.012218	0.0549283	0
G1	_	SPAC13G7.11	SPAC13G7.11_G1	mba1	1138	5.78483	-0.0629916	0.329233	0.566111	0.995634	0	-0.415214	13.1284	0.000290857	0.00224207	-1	-0.26664	5.72624	0.0167132	0.0695957	0
G1	_	SPAC13G7.12c	SPAC13G7.12c_G1	eki1	2864	5.29544	-0.204709	1.46676	0.225858	0.947294	0	0.0061949	0.00134268	0.97077	0.98682	0	0.0123656	0.00545052	0.941148	0.968446	0
G1	_	SPAC13G7.13c	SPAC13G7.13c_G1	msa1	4173	4.96963	-0.652007	5.12186	0.0236263	0.549972	0	0.220185	0.622075	0.430277	0.615791	0	0.411102	2.18537	0.139328	0.308758	0
G1	_	SPAC140.01	SPAC140.01_G1	sdh2	1317	8.42227	0.0355087	0.115353	0.73413	0.995634	0	-0.223463	4.50501	0.0337957	0.10352	0	-0.184584	3.1003	0.0782777	0.211133	0
G1	_	SPAC140.02	SPAC140.02_G1	gar2	2044	8.7824	0.0797056	0.530627	0.466343	0.995634	0	0.68485	39.1852	3.8546e-10	1.13412e-08	1	0.775011	50.1999	1.38853e-12	7.13271e-11	1
G1	_	SPAC140.03	SPAC140.03_G1	arb1	1522	6.4429	-0.0480089	0.200127	0.654618	0.995634	0	0.0233912	0.0467152	0.828881	0.903723	0	0.0402215	0.141399	0.706894	0.838718	0
G1	_	SPAC140.04	SPAC140.04_G1	ctr1	1767	4.61828	0.0202481	0.0102935	0.919188	0.995634	0	0.527572	7.20431	0.00727286	0.031499	1	0.359434	3.33208	0.0679407	0.192054	0
G1	_	SPAC1420.01c	SPAC1420.01c_G1		2651	8.00185	-0.146814	2.31151	0.128419	0.889217	0	-0.000153893	2.53224e-06	0.99873	0.999209	0	-9.90502e-05	1.05098e-06	0.999182	0.999501	0
G1	_	SPAC1B3.06c	SPAC1B3.06c_G1		1428	6.36036	-0.106999	1.08605	0.297349	0.970858	0	-0.265641	6.40429	0.0113845	0.0449843	-1	-0.244075	5.55741	0.0184026	0.0754277	0
G1	_	SPAC1420.02c	SPAC1420.02c_G1	cct5	2001	8.22471	-0.0440302	0.228127	0.632916	0.995634	0	-0.159034	2.93753	0.0865428	0.210627	0	-0.181324	3.83781	0.0501089	0.154696	0
G1	_	SPAC1420.03	SPAC1420.03_G1	rpn501	1540	5.2073	0.237397	2.85667	0.0909956	0.815836	0	0.230975	2.61832	0.105636	0.243033	0	0.179017	1.60419	0.20531	0.400585	0
G1	_	SPAC1420.04c	SPAC1420.04c_G1	cox1101	2431	2.37583	0.00639097	0.000412194	0.983802	0.9991	0	-0.540014	2.46528	0.116387	0.258127	0	-0.274931	0.708617	0.399903	0.604863	0
G1	_	SPAC144.01	SPAC144.01_G1		539	5.5284	-0.052937	0.120491	0.728503	0.995634	0	0.483604	10.3152	0.0013194	0.00796597	1	0.372333	6.16272	0.013047	0.0575006	0
G1	_	SPAC144.02	SPAC144.02_G1	iec1	1451	6.53415	0.055097	0.370918	0.542504	0.995634	0	0.144425	2.50325	0.113612	0.254106	0	0.0703764	0.60438	0.436912	0.636041	0
G1	_	SPAC144.03	SPAC144.03_G1	ade2	1373	8.07132	0.00522147	0.00320206	0.954874	0.995634	0	-0.115961	1.55457	0.212463	0.38842	0	0.0501143	0.294689	0.587231	0.752242	0
G1	_	SPAC144.04c	SPAC144.04c_G1	spe1	1788	7.83014	-0.0434055	0.178336	0.672807	0.995634	0	-0.35443	11.6082	0.000656605	0.00446791	-1	-0.307913	8.84709	0.00293556	0.0179593	-1
G1	_	SPAC144.05	SPAC144.05_G1	irc20	4847	7.04859	-0.107161	0.919523	0.3376	0.982694	0	0.221388	3.94581	0.0469882	0.132205	0	0.222157	4.02414	0.0448534	0.143416	0
G1	_	SPAC1B3.11c	SPAC1B3.11c_G1	ypt4	1650	4.6855	0.344421	4.29627	0.0381961	0.62634	0	0.612548	13.6858	0.000216078	0.00174956	1	0.483604	8.59425	0.00337226	0.0201467	1
G1	_	SPAC144.06	SPAC144.06_G1	apl5	3935	7.23948	-0.048398	0.26227	0.608565	0.995634	0	-0.0733738	0.591776	0.441733	0.625755	0	-0.138906	2.14198	0.143316	0.314735	0
G1	_	SPAC144.07c	SPAC144.07c_G1	gpn2	1651	6.9627	0.106943	1.10955	0.29218	0.970725	0	0.213635	4.37937	0.0363765	0.109391	0	0.246319	5.9106	0.0150501	0.0641189	0
G1	_	SPAC1F5.06	SPAC1F5.06_G1	lsh1	4691	7.56646	-0.318471	6.62697	0.0100446	0.390991	0	-0.47535	14.5529	0.000136282	0.00117192	-1	-0.464011	13.9729	0.000185461	0.00181891	-1
G1	_	SPAC144.09c	SPAC144.09c_G1	sfc2	1785	6.06853	-0.0824989	0.574862	0.448333	0.995634	0	0.227635	4.42787	0.0353566	0.107109	0	0.106175	0.971676	0.324263	0.534496	0
G1	_	SPAC144.10c	SPAC144.10c_G1	gwt1	1668	6.11277	0.0354684	0.122246	0.726611	0.995634	0	-0.635839	34.923	3.43011e-09	8.49665e-08	-1	-0.647393	37.3277	9.98584e-10	3.2765e-08	-1
G1	_	SPAC144.11	SPAC144.11_G1	rps1102	595	7.81729	0.0868225	0.435354	0.509374	0.995634	0	0.297935	5.10413	0.023869	0.079933	0	0.104027	0.622339	0.43018	0.630907	0
G1	_	SPAC144.12	SPAC144.12_G1	rki1	3059	8.17989	0.00767172	0.00447002	0.946695	0.995634	0	-0.145825	1.59824	0.206152	0.380995	0	-0.11317	0.968351	0.325092	0.534951	0
G1	_	SPAC144.13c	SPAC144.13c_G1	srw1	3538	5.40817	0.0229864	0.0168444	0.896736	0.995634	0	-0.0922095	0.263773	0.60754	0.760752	0	-0.182058	1.03454	0.309096	0.518219	0
G1	_	SPAC227.05	SPAC227.05_G1	pfd4	454	5.88617	-0.203006	2.73195	0.0983592	0.833431	0	-0.312776	6.23134	0.0125509	0.048049	-1	-0.312046	6.35758	0.0116881	0.0531948	0
G1	_	SPAC144.14	SPAC144.14_G1	klp8	1929	5.35204	0.282128	3.21692	0.0728808	0.778516	0	0.242688	2.31836	0.127855	0.275633	0	0.157409	0.991526	0.31937	0.529775	0
G1	_	SPAC144.15c	SPAC144.15c_G1	cog1	4208	7.40831	-0.0267079	0.0792235	0.778352	0.995634	0	0.0977934	1.05444	0.304486	0.493206	0	0.08521	0.810977	0.367832	0.576012	0
G1	_	SPAC23D3.02	SPAC23D3.02_G1	rfc2	1220	6.90193	0.0750414	0.435708	0.509201	0.995634	0	0.286994	6.35701	0.0116918	0.0456812	1	0.295158	6.77511	0.00924377	0.0441882	1
G1	_	SPAC144.16	SPAC144.16_G1	cia2	2425	6.41164	0.137572	1.7117	0.190765	0.920373	0	0.474389	20.5785	5.72359e-06	7.24642e-05	1	0.39148	14.1379	0.000169886	0.00169264	1
G1	_	SPAC144.17c	SPAC144.17c_G1		2801	6.61169	0.0962909	0.780042	0.377128	0.991043	0	0.0145294	0.0173215	0.895292	0.943856	0	-0.0128299	0.0136861	0.90687	0.951985	0
G1	_	SPAC144.18	SPAC144.18_G1	vrg4	2588	7.93068	-0.0999973	0.892122	0.344903	0.983844	0	-0.447836	17.4335	2.97529e-05	0.000310769	-1	-0.273175	6.59463	0.0102287	0.0479456	-1
G1	_	SPAC1486.01	SPAC1486.01_G1	sod2	1148	8.26476	0.254634	4.3751	0.0364677	0.612716	0	-0.0236083	0.0372619	0.846933	0.914968	0	-0.216518	3.12311	0.0771895	0.209166	0
G1	_	SPAC1486.02c	SPAC1486.02c_G1	dsc2	1584	7.00095	-0.00848855	0.00850998	0.9265	0.995634	0	0.0721367	0.606413	0.436142	0.620781	0	-0.0052412	0.00323866	0.954618	0.974051	0
G1	_	SPAC1486.03c	SPAC1486.03c_G1	ntr1	2653	6.83695	0.0830658	0.891058	0.345191	0.983844	0	-0.0852009	0.89965	0.342876	0.533915	0	-0.109812	1.52368	0.217064	0.415751	0
G1	_	SPAC1486.04c	SPAC1486.04c_G1	alm1	5497	7.90667	-0.205702	2.74157	0.0977689	0.833431	0	-0.0637502	0.263755	0.607552	0.760752	0	-0.0814388	0.432364	0.510831	0.696103	0
G1	_	SPAC1486.05	SPAC1486.05_G1	nup189	5451	9.40413	-0.0572316	0.40131	0.526414	0.995634	0	-0.0440329	0.236769	0.626549	0.774183	0	-0.0701419	0.602506	0.437624	0.636183	0
G1	_	SPAC1486.06	SPAC1486.06_G1	npt1	1815	7.1132	-0.0987167	1.17315	0.278755	0.963832	0	-0.0232128	0.0640227	0.800247	0.887166	0	-0.020324	0.0498834	0.823266	0.905477	0
G1	_	SPAC1486.07c	SPAC1486.07c_G1	mrpl19	665	6.05536	0.128436	0.984441	0.321105	0.97735	0	0.175219	1.79683	0.180096	0.34803	0	0.187569	2.10606	0.146717	0.320164	0
G1	_	SPAC1486.08	SPAC1486.08_G1	cox16	2124	6.13293	0.0695028	0.331139	0.564989	0.995634	0	0.419574	12.1747	0.000484414	0.0034616	1	0.237104	3.89545	0.0484172	0.151337	0
G1	_	SPAC1486.09	SPAC1486.09_G1	nob1	1464	6.95183	0.123966	1.56051	0.21159	0.932514	0	0.947365	95.5855	1.41642e-22	2.11351e-20	1	0.761775	61.7767	3.84701e-15	3.0518e-13	1
G1	_	SPAC24B11.08c	SPAC24B11.08c_G1	erv46	1878	5.90178	-0.166653	2.1846	0.139398	0.905888	0	-0.344048	8.82585	0.00296993	0.0152437	-1	-0.145793	1.67206	0.195982	0.38954	0
G1	_	SPAC1486.11	SPAC1486.11_G1	fmc1	315	4.52541	0.0475618	0.0954961	0.757303	0.995634	0	-0.0472744	0.089008	0.765442	0.867819	0	-0.130128	0.690304	0.406061	0.609989	0
G1	_	SPAC14C4.01c	SPAC14C4.01c_G1	atg43	4252	5.92325	0.0380163	0.0917953	0.761907	0.995634	0	-0.0248225	0.0379711	0.845501	0.914348	0	0.0508911	0.164072	0.685434	0.823546	0
G1	_	SPAC14C4.02c	SPAC14C4.02c_G1	smc5	3964	6.91391	-0.0174827	0.0252808	0.873669	0.995634	0	0.0830924	0.56591	0.451889	0.635259	0	0.0352328	0.102851	0.748435	0.863801	0
G1	_	SPAC14C4.03	SPAC14C4.03_G1	mek1	1338	3.4116	-0.0116516	0.00235227	0.961318	0.995634	0	0.124865	0.266216	0.605881	0.760172	0	0.115638	0.234077	0.628517	0.786866	0
G1	_	SPAC14C4.04	SPAC14C4.04_G1		1708	6.22575	-0.00648964	0.00336674	0.95373	0.995634	0	0.0802602	0.50766	0.476154	0.655836	0	0.238647	4.65487	0.0309655	0.110476	0
G1	_	SPAC24C9.12c	SPAC24C9.12c_G1	shm1	1871	7.46882	-0.147241	1.57039	0.21015	0.932066	0	-0.413133	12.0498	0.000517972	0.00365144	-1	-0.249529	4.47881	0.0343177	0.119086	0
G1	_	SPAC14C4.06c	SPAC14C4.06c_G1	nab2	1956	5.61464	-0.0876307	0.401867	0.526127	0.995634	0	-0.404228	8.0765	0.0044843	0.0212741	-1	-0.362101	6.63931	0.00997523	0.046933	-1
G1	_	SPAC14C4.07	SPAC14C4.07_G1		2566	7.0627	-0.0238656	0.0460606	0.830066	0.995634	0	-0.00853256	0.00581403	0.93922	0.967535	0	0.0134687	0.014697	0.903508	0.95054	0
G1	_	SPAC14C4.08	SPAC14C4.08_G1	mug5	1163	3.1723	-0.345869	1.35261	0.244822	0.947728	0	-0.0315099	0.0113824	0.915036	0.955755	0	0.0372491	0.0163391	0.898288	0.94758	0
G1	_	SPAC14C4.09	SPAC14C4.09_G1	agn1	2014	4.84787	-0.136534	0.842658	0.358638	0.983969	0	-0.0815028	0.293119	0.588229	0.746845	0	0.0411863	0.0787657	0.778977	0.881041	0
G1	_	SPAC14C4.10c	SPAC14C4.10c_G1		1619	5.99984	-0.0496003	0.152787	0.695886	0.995634	0	-0.0778355	0.365612	0.545406	0.71225	0	0.127434	1.02292	0.311826	0.52136	0
G1	_	SPAC14C4.11	SPAC14C4.11_G1	vtc2	2729	8.19402	-0.0708168	0.57382	0.448745	0.995634	0	0.737779	63.459	1.63739e-15	1.01599e-13	1	0.784435	72.2542	1.89188e-17	2.00956e-15	1
G1	_	SPAC14C4.12c	SPAC14C4.12c_G1	laf1	1806	5.0331	-0.0846925	0.433203	0.510421	0.995634	0	-0.282539	4.47211	0.0344524	0.104965	0	-0.271897	4.31889	0.0376916	0.126928	0
G1	_	SPAC14C4.13	SPAC14C4.13_G1	rad17	2558	6.21724	-0.186023	3.88106	0.0488336	0.666754	0	0.0541111	0.32916	0.566154	0.728573	0	-0.0267319	0.0818478	0.774809	0.87807	0
G1	_	SPAC14C4.14	SPAC14C4.14_G1	atp1	4799	7.93719	0.0255506	0.0665085	0.79649	0.995634	0	0.174229	3.08244	0.0791419	0.196429	0	0.168739	2.90503	0.0883038	0.228753	0
G1	_	SPAC14C4.15c	SPAC14C4.15c_G1	dpp1	2696	6.69194	0.0605604	0.365158	0.545655	0.995634	0	0.0948882	0.881423	0.347812	0.538207	0	0.0714207	0.507026	0.476429	0.66811	0
G1	_	SPAC14C4.16	SPAC14C4.16_G1	dad3	1066	4.90683	0.0155628	0.00879845	0.925268	0.995634	0	-0.335912	3.82153	0.0505979	0.139814	0	-0.155652	0.862859	0.35294	0.561389	0
G1	_	SPAC1527.01	SPAC1527.01_G1	mok11	7475	7.27659	-0.167591	3.00167	0.0831788	0.798287	0	0.079282	0.672451	0.412198	0.599639	0	0.22024	5.30837	0.0212232	0.0838096	0
G1	_	SPAC1527.02	SPAC1527.02_G1	sft2	952	6.46976	0.0473411	0.20329	0.652078	0.995634	0	-0.0802946	0.563044	0.453036	0.636159	0	0.0850332	0.656683	0.417733	0.620511	0
G1	_	SPAC1527.03	SPAC1527.03_G1	slr1	2501	6.98992	-0.142478	1.80536	0.179066	0.919597	0	0.311495	8.77099	0.00306059	0.0156068	1	0.244584	5.4517	0.0195493	0.0789997	0
G1	_	SPAC1556.01c	SPAC1556.01c_G1	rad50	4103	6.82741	-0.0731633	0.343688	0.557708	0.995634	0	0.0681214	0.295745	0.586562	0.745518	0	-0.0379985	0.0927768	0.760676	0.869793	0
G1	_	SPAC1556.02c	SPAC1556.02c_G1	sdh1	2126	8.35718	-0.130117	1.38216	0.239734	0.947728	0	-0.0641386	0.334975	0.562744	0.72626	0	-0.00601874	0.00296639	0.956565	0.975715	0
G1	_	SPAC1556.03	SPAC1556.03_G1	azr1	2551	6.73484	0.133349	1.501	0.220518	0.939486	0	-0.197976	3.16943	0.0750286	0.18912	0	-0.0835371	0.578443	0.446923	0.644322	0
G1	_	SPAC1556.04c	SPAC1556.04c_G1	cdd1	1795	4.05379	0.137312	0.545141	0.46031	0.995634	0	0.490688	7.12823	0.00758795	0.0326381	1	0.49803	7.63783	0.00571565	0.030278	1
G1	_	SPAC1556.05c	SPAC1556.05c_G1	cgr1	2981	5.99687	-0.0103433	0.00774662	0.929865	0.995634	0	0.225269	3.67625	0.0551927	0.149285	0	0.242237	4.36033	0.0367852	0.124815	0
G1	_	SPAC1556.06	SPAC1556.06_G1	meu1	2331	4.96143	0.0123376	0.00459274	0.945969	0.995634	0	0.303956	2.78165	0.0953496	0.225148	0	0.0560572	0.0948151	0.758143	0.869084	0
G1	_	SPAC1556.07	SPAC1556.07_G1	pmm1	944	9.67677	0.0144254	0.0214802	0.883478	0.995634	0	-0.147694	2.23777	0.134675	0.286201	0	-0.0807483	0.671215	0.412628	0.616141	0
G1	_	SPAC1556.08c	SPAC1556.08c_G1	cbs2	1389	7.36086	0.0309746	0.115037	0.73448	0.995634	0	0.00888133	0.00929081	0.923212	0.960612	0	0.0687739	0.566461	0.451669	0.647627	0
G1	_	SPAC1565.01	SPAC1565.01_G1	rcf2	2923	6.78458	0.134107	1.10272	0.293671	0.970725	0	-0.676847	26.4105	2.76031e-07	4.65022e-06	-1	-0.450813	12.0424	0.000520032	0.00439816	-1
G1	_	SPAC1565.02c	SPAC1565.02c_G1	rga10	1460	5.87759	0.0312428	0.0883629	0.766269	0.995634	0	0.303885	8.42758	0.00369573	0.0181944	1	0.270134	6.84114	0.0089082	0.0431435	1
G1	_	SPAC1565.03	SPAC1565.03_G1		1036	2.33646	-0.212629	0.541552	0.46179	0.995634	0	-0.608861	3.8504	0.0497342	0.138403	0	-0.51493	2.96961	0.0848422	0.223406	0
G1	_	SPAC1565.04c	SPAC1565.04c_G1	ste4	1161	6.43839	0.0480241	0.188745	0.663963	0.995634	0	0.140549	1.59985	0.205924	0.380686	0	-0.120207	1.16371	0.280697	0.490008	0
G1	_	SPAC26A3.05	SPAC26A3.05_G1	chc1	5234	10.4453	-0.100573	1.07729	0.299305	0.970858	0	-0.289409	8.88326	0.00287797	0.0148814	-1	-0.115012	1.40854	0.2353	0.439508	0
G1	_	SPAC1565.06c	SPAC1565.06c_G1	spg1	1194	6.39654	0.0481322	0.258416	0.611211	0.995634	0	-0.110741	1.30086	0.254055	0.436988	0	-0.0526519	0.304076	0.581338	0.748561	0
G1	_	SPAC26A3.15c	SPAC26A3.15c_G1	nsp1	2719	6.79127	-0.127256	2.03492	0.153722	0.917552	0	-0.329384	13.0031	0.000310984	0.00238256	-1	-0.301545	11.1876	0.000823473	0.00639492	-1
G1	_	SPAC1565.07c	SPAC1565.07c_G1	knd1	4643	7.44308	0.0675437	0.445251	0.504599	0.995634	0	-0.0456192	0.199589	0.655053	0.794297	0	-0.0507664	0.249865	0.61717	0.777384	0
G1	_	SPAC1565.08	SPAC1565.08_G1	cdc48	3043	10.1414	-0.0434234	0.154615	0.694164	0.995634	0	-0.523847	22.2826	2.35324e-06	3.24126e-05	-1	-0.276931	6.26169	0.0123376	0.0552286	0
G1	_	SPAC15A10.01	SPAC15A10.01_G1	atm1	4217	7.25788	0.048528	0.279791	0.596838	0.995634	0	-0.308821	10.8366	0.000995132	0.0063379	-1	-0.169641	3.36216	0.0667106	0.189603	0
G1	_	SPAC15A10.02	SPAC15A10.02_G1	taf12	2071	6.97438	0.0655454	0.467062	0.494342	0.995634	0	0.0897111	0.860397	0.353627	0.544116	0	-0.00823885	0.0073003	0.93191	0.962881	0
G1	_	SPAC27D7.08c	SPAC27D7.08c_G1	mtl16	1528	5.45636	0.182325	1.85805	0.17285	0.919597	0	0.33548	6.21837	0.0126432	0.0483433	1	0.208289	2.42381	0.119504	0.278104	0
G1	_	SPAC15A10.04c	SPAC15A10.04c_G1	zpr1	1789	9.48966	0.130034	0.840955	0.359124	0.983969	0	0.367368	6.69165	0.00968657	0.0395993	1	0.412678	8.43493	0.0036808	0.0216191	1
G1	_	SPAC15A10.05c	SPAC15A10.05c_G1	mug182	966	2.56471	0.135241	0.276503	0.599003	0.995634	0	0.297214	1.31357	0.25175	0.434872	0	0.0830092	0.103991	0.747092	0.863164	0
G1	_	SPAC15A10.06	SPAC15A10.06_G1		2026	5.92524	0.125716	1.07243	0.300397	0.970858	0	0.0485935	0.155168	0.693644	0.819892	0	0.152678	1.58299	0.208331	0.404537	0
G1	_	SPAC15A10.07	SPAC15A10.07_G1		1266	6.52061	-0.128118	1.7833	0.181745	0.919597	0	-0.208665	4.56228	0.0326835	0.101049	0	-0.0990037	1.06693	0.301641	0.509665	0
G1	_	SPAC15A10.08	SPAC15A10.08_G1	ain1	2032	8.12055	-0.0208503	0.0478672	0.826817	0.995634	0	-0.308524	10.2679	0.00135363	0.00810237	-1	-0.549285	32.3757	1.27063e-08	3.47731e-07	-1
G1	_	SPAC15A10.09c	SPAC15A10.09c_G1	pun1	1544	5.20483	0.022832	0.0212684	0.88405	0.995634	0	-0.255253	2.51806	0.112549	0.252985	0	-0.256199	2.59894	0.106935	0.259753	0
G1	_	SPAC15A10.10	SPAC15A10.10_G1	mde6	3252	5.33551	-0.0823423	0.366398	0.544975	0.995634	0	0.0263128	0.0367703	0.847934	0.915284	0	0.00172098	0.00016131	0.989867	0.994628	0
G1	_	SPAC15A10.11	SPAC15A10.11_G1	ubr11	6634	8.53321	-0.319883	7.38208	0.00658769	0.344042	0	-0.205657	3.0505	0.0807123	0.199536	0	-0.08845	0.566838	0.451518	0.647627	0
G1	_	SPAC15A10.12c	SPAC15A10.12c_G1	tca17	1109	6.50724	0.00725456	0.00553465	0.940696	0.995634	0	-0.0663392	0.446949	0.503787	0.680879	0	-0.0233956	0.0571635	0.811037	0.899097	0
G1	_	SPAC15A10.13	SPAC15A10.13_G1	ppk3	3100	6.47855	-0.0615165	0.413078	0.520411	0.995634	0	0.190639	3.9786	0.0460819	0.130485	0	0.144754	2.33559	0.126447	0.289108	0
G1	_	SPAC15A10.15	SPAC15A10.15_G1	sgo2	2319	6.12437	-0.00701934	0.0046211	0.945803	0.995634	0	0.403247	15.6657	7.55811e-05	0.000697594	1	0.191913	3.53596	0.0600514	0.176585	0
G1	_	SPAC15A10.16	SPAC15A10.16_G1	bud6	4321	7.33467	-0.118607	0.899545	0.342904	0.983844	0	0.156625	1.56833	0.21045	0.386064	0	0.228733	3.38127	0.0659414	0.188443	0
G1	_	SPAC15A10.17	SPAC15A10.17_G1	coa2	261	4.51343	0.110396	0.415251	0.519316	0.995634	0	-0.009404	0.00285572	0.957382	0.97846	0	0.00232298	0.000184468	0.989164	0.994628	0
G1	_	SPAC15E1.02c	SPAC15E1.02c_G1		560	5.51492	0.268697	1.2093	0.271471	0.960106	0	-0.246592	0.978179	0.322649	0.514383	0	-0.408219	2.70018	0.100337	0.248882	0
G1	_	SPAC15E1.03	SPAC15E1.03_G1	rpl42	471	10.5738	0.115773	0.81655	0.366191	0.989064	0	0.19253	2.24963	0.133646	0.284885	0	0.25741	4.01399	0.0451241	0.144074	0
G1	_	SPAC15E1.04	SPAC15E1.04_G1	hal3	2163	6.55422	-0.165792	1.91491	0.166419	0.919597	0	-0.222839	3.37534	0.0661788	0.171569	0	0.0108548	0.0082856	0.927473	0.961374	0
G1	_	SPAC15E1.05c	SPAC15E1.05c_G1	ect1	1309	6.64562	0.0252107	0.0773711	0.780892	0.995634	0	0.0100301	0.0119103	0.913096	0.955002	0	-0.00720964	0.00629036	0.936785	0.965915	0
G1	_	SPAC15E1.06	SPAC15E1.06_G1	vps29	1030	6.68839	0.0469047	0.180073	0.671311	0.995634	0	-0.0261198	0.0544446	0.815502	0.896466	0	0.0368572	0.11057	0.739496	0.858962	0
G1	_	SPAC15E1.07c	SPAC15E1.07c_G1	moa1	519	0.603749	0.0340135	0.00311774	0.955472	0.995634	0	1.28661	5.81087	0.0159274	0.0580671	0	0.449971	0.61052	0.434592	0.634278	0
G1	_	SPAC15E1.08	SPAC15E1.08_G1	naa10	626	6.83802	0.0477459	0.181888	0.669755	0.995634	0	-0.22718	3.97153	0.0462757	0.130812	0	-0.184828	2.66948	0.102289	0.251984	0
G1	_	SPAC2E12.02	SPAC2E12.02_G1	hsf1	2442	7.10906	0.147654	2.35995	0.124486	0.889217	0	0.380756	15.6976	7.43176e-05	0.000687959	1	0.217355	5.12159	0.02363	0.0909081	0
G1	_	SPAC15E1.10	SPAC15E1.10_G1	fub1	1090	5.12187	0.271677	3.91911	0.0477402	0.659932	0	0.202645	2.0847	0.148781	0.306127	0	0.28062	4.17825	0.0409461	0.134562	0
G1	_	SPAC15F9.01c	SPAC15F9.01c_G1	glm1	1048	3.44637	0.0633313	0.0354338	0.85069	0.995634	0	-0.330949	0.908455	0.340525	0.53198	0	-0.15356	0.199993	0.654726	0.803644	0
G1	_	SPAC2F7.13c	SPAC2F7.13c_G1	wrs1	1641	7.75311	0.0118954	0.0181598	0.892803	0.995634	0	0.220125	6.21145	0.0126927	0.0484512	1	0.199815	5.15954	0.023119	0.0892709	0
G1	_	SPAC15F9.02	SPAC15F9.02_G1	seh1	1639	6.60697	0.00569398	0.00382792	0.950666	0.995634	0	-0.00211232	0.000512934	0.981931	0.991263	0	-0.14845	2.54569	0.110595	0.265134	0
G1	_	SPAC15F9.03c	SPAC15F9.03c_G1	nxt2	725	7.73746	0.00691357	0.00343582	0.953258	0.995634	0	-0.0633636	0.284992	0.593448	0.750129	0	-0.0491613	0.173177	0.677303	0.819436	0
G1	_	SPAC16.01	SPAC16.01_G1	rho2	1375	5.13225	-0.00279854	0.000283211	0.986573	0.9991	0	0.159284	0.92724	0.335581	0.527883	0	0.268865	2.72427	0.0988333	0.246376	0
G1	_	SPAC16.02c	SPAC16.02c_G1	srp2	1781	6.40172	-0.217149	3.96618	0.0464228	0.659382	0	-0.0368428	0.113992	0.735644	0.848882	0	0.0110063	0.010394	0.918796	0.957425	0
G1	_	SPAC16.03c	SPAC16.03c_G1	ura2	1579	6.0534	0.041812	0.153258	0.695441	0.995634	0	0.11039	1.04645	0.306326	0.494918	0	0.108613	1.03964	0.307904	0.51636	0
G1	_	SPAC16.04	SPAC16.04_G1	dus3	2063	5.57502	-0.0028207	0.000502004	0.982125	0.9991	0	0.222883	3.13663	0.0765519	0.1919	0	0.408117	11.0595	0.000882356	0.00677663	1
G1	_	SPAC16.05c	SPAC16.05c_G1	sfp1	2144	7.03764	-0.149685	1.38094	0.239941	0.947728	0	-0.0798725	0.390314	0.532135	0.703717	0	-0.0850863	0.446072	0.504206	0.692196	0
G1	_	SPAC1610.01	SPAC1610.01_G1	saf5	1038	5.78968	-0.00278229	0.000641646	0.979791	0.9991	0	0.170204	2.38037	0.122868	0.267831	0	0.309312	8.25852	0.00405613	0.0233459	1
G1	_	SPAC1610.02c	SPAC1610.02c_G1	mrpl1	1095	6.29584	0.131736	1.53536	0.21531	0.934145	0	0.158894	2.18813	0.139078	0.292877	0	-0.0319108	0.0882559	0.766406	0.87213	0
G1	_	SPAC1610.03c	SPAC1610.03c_G1	crp79	2315	3.05444	0.0715326	0.0798655	0.77748	0.995634	0	0.510396	4.23802	0.0395283	0.116193	0	0.00863483	0.00116534	0.972768	0.984373	0
G1	_	SPAC1610.04	SPAC1610.04_G1	mug99	2092	6.2186	0.29101	6.8951	0.00864321	0.371007	0	-0.119556	1.08993	0.296487	0.484243	0	-0.0627514	0.309287	0.578118	0.746562	0
G1	_	SPAC1635.01	SPAC1635.01_G1	por1	1491	8.17557	-0.102551	0.834873	0.360867	0.986287	0	-0.0126079	0.0125701	0.910731	0.953587	0	0.016863	0.0225999	0.880502	0.93686	0
G1	_	SPAC1639.01c	SPAC1639.01c_G1	elo1	2537	7.53839	-0.0506085	0.20461	0.651025	0.995634	0	-0.340162	9.03651	0.0026464	0.0139722	-1	-0.329627	8.55422	0.00344723	0.0205164	-1
G1	_	SPAC30.01c	SPAC30.01c_G1	sec72	5681	8.58379	-0.169081	2.6954	0.100638	0.842682	0	-0.258416	6.24357	0.0124645	0.0478351	-1	-0.180189	3.05707	0.0803865	0.215384	0
G1	_	SPAC1639.02c	SPAC1639.02c_G1	trk2	2851	6.80095	-0.013038	0.0175619	0.894572	0.995634	0	0.418277	18.4073	1.78377e-05	0.000199623	1	0.379011	15.3066	9.13949e-05	0.000984144	1
G1	_	SPAC167.01	SPAC167.01_G1	ire1	3462	6.46861	0.0603018	0.341351	0.559051	0.995634	0	0.0987407	0.898593	0.343159	0.534173	0	0.0515755	0.248746	0.617959	0.777973	0
G1	_	SPAC167.02	SPAC167.02_G1	ptb1	3408	6.22358	0.130484	1.43422	0.231077	0.947728	0	0.374185	11.8139	0.000587894	0.00404427	1	0.451672	17.6941	2.59429e-05	0.000323229	1
G1	_	SPAC167.03c	SPAC167.03c_G1	snu66	2937	6.06864	-0.0430728	0.13318	0.715158	0.995634	0	0.334322	8.14644	0.00431457	0.020625	1	0.130214	1.23793	0.26587	0.473386	0
G1	_	SPAC167.04	SPAC167.04_G1	pam17	1158	7.15828	0.0310575	0.0803061	0.776883	0.995634	0	0.0971267	0.776721	0.378146	0.567491	0	0.114974	1.09864	0.294565	0.501778	0
G1	_	SPAC167.05	SPAC167.05_G1	dbs2	3385	5.87373	-0.0759009	0.284449	0.5938	0.995634	0	-0.0457652	0.101283	0.750295	0.859145	0	0.0187585	0.0174546	0.894893	0.945083	0
G1	_	SPAC167.06c	SPAC167.06c_G1	mug143	840	4.92476	0.186165	1.56222	0.21134	0.932066	0	-0.0176552	0.0132462	0.908372	0.952127	0	-0.071757	0.223817	0.636147	0.790565	0
G1	_	SPAC167.07c	SPAC167.07c_G1	hul5	3694	7.16475	0.12009	1.50414	0.220035	0.939486	0	-0.135366	1.85021	0.173759	0.34019	0	-0.129937	1.73131	0.188243	0.378479	0
G1	_	SPAC167.08	SPAC167.08_G1	Tf2-2	4423	2.30574	0.265762	0.686561	0.407337	0.992709	0	0.0155926	0.00212803	0.963206	0.982489	0	0.228773	0.507796	0.476095	0.667883	0
G1	_	SPAC167.09	SPAC167.09_G1	pga1	1479	4.93761	0.0115319	0.0060025	0.938245	0.995634	0	-0.00476141	0.000985367	0.974958	0.988562	0	-0.0216392	0.020941	0.88494	0.938872	0
G1	_	SPAC1687.01	SPAC1687.01_G1	rpc19	622	6.99168	-0.00304604	0.000630809	0.979963	0.9991	0	0.579792	23.1318	1.5127e-06	2.19447e-05	1	0.54912	20.9289	4.76644e-06	7.12918e-05	1
G1	_	SPAC1687.02	SPAC1687.02_G1	rce1	2271	5.08188	-0.14948	1.28052	0.257803	0.951104	0	-0.0252363	0.0358784	0.849767	0.916211	0	0.0108168	0.00687878	0.933901	0.964125	0
G1	_	SPAC1687.03c	SPAC1687.03c_G1	rfc4	1191	6.72643	0.0363259	0.174921	0.675775	0.995634	0	0.193752	4.937	0.0262876	0.0855814	0	0.0599874	0.476529	0.489999	0.680741	0
G1	_	SPAC1687.04	SPAC1687.04_G1	mcb1	1978	4.98216	0.0131491	0.010116	0.919885	0.995634	0	0.346317	7.18078	0.00736887	0.0318707	1	0.132116	1.04612	0.306403	0.514531	0
G1	_	SPAC1687.05	SPAC1687.05_G1	pli1	3067	5.98929	-0.178261	2.53724	0.111189	0.862289	0	-0.0496148	0.194494	0.659203	0.795843	0	-0.222772	3.93359	0.0473307	0.148757	0
G1	_	SPAC1687.06c	SPAC1687.06c_G1	rpl44	494	8.0574	0.081323	0.334703	0.562903	0.995634	0	0.318037	5.0963	0.023977	0.0801306	0	0.263321	3.49614	0.061512	0.179539	0
G1	_	SPAC1687.07	SPAC1687.07_G1		375	3.98713	0.0724645	0.144999	0.703361	0.995634	0	-0.0776123	0.156027	0.692841	0.819252	0	0.00648757	0.00114958	0.972953	0.984373	0
G1	_	SPAC1687.08	SPAC1687.08_G1		291	2.22689	0.326543	1.00608	0.315844	0.973112	0	-0.202498	0.331134	0.564992	0.728111	0	0.0548937	0.0268651	0.869805	0.930324	0
G1	_	SPAC30D11.13	SPAC30D11.13_G1	hus5	866	6.12909	0.15749	2.12489	0.144923	0.907732	0	0.279334	6.60302	0.0101806	0.0412157	1	0.216666	4.03462	0.0445758	0.142967	0
G1	_	SPAC1687.10	SPAC1687.10_G1	mcp1	2321	5.92481	-0.0587605	0.278556	0.597649	0.995634	0	0.146222	1.72073	0.1896	0.360613	0	0.124924	1.28257	0.257421	0.464514	0
G1	_	SPAC1687.11	SPAC1687.11_G1	spb1	2625	7.31212	-0.130039	1.43104	0.231595	0.947728	0	0.654744	37.3171	1.00402e-09	2.7239e-08	1	0.451178	17.7534	2.51465e-05	0.000314557	1
G1	_	SPAC1687.12c	SPAC1687.12c_G1	coq4	964	6.97061	0.169648	2.67905	0.101676	0.845098	0	0.135345	1.67488	0.195606	0.367216	0	0.143421	1.90495	0.167525	0.349843	0
G1	_	SPAC1687.13c	SPAC1687.13c_G1	csn5	1107	5.38403	-0.175469	1.70103	0.192153	0.920373	0	0.0406361	0.0910685	0.762823	0.86621	0	-0.120648	0.808339	0.368612	0.576658	0
G1	_	SPAC1687.14c	SPAC1687.14c_G1		1211	4.92422	0.0987277	0.461055	0.497131	0.995634	0	-0.220834	2.13	0.14444	0.300434	0	-0.286839	3.6827	0.0549799	0.16547	0
G1	_	SPAC1687.15	SPAC1687.15_G1	gsk3	1826	6.97121	0.0323834	0.125676	0.722958	0.995634	0	-0.0370254	0.159519	0.6896	0.818056	0	0.114998	1.59592	0.206483	0.402464	0
G1	_	SPAC31A2.07c	SPAC31A2.07c_G1	dbp10	2705	7.30195	0.130536	2.15457	0.142146	0.907732	0	0.28557	10.2635	0.00135688	0.00810638	1	0.176768	3.9533	0.0467796	0.147543	0
G1	_	SPAC1687.16c	SPAC1687.16c_G1	erg31	1597	5.65029	-0.0240023	0.0222267	0.881486	0.995634	0	-1.64455	87.5604	8.17433e-21	1.02457e-18	-1	-1.38831	66.0257	4.4509e-16	3.88897e-14	-1
G1	_	SPAC1687.17c	SPAC1687.17c_G1		973	5.58363	0.111814	0.768483	0.380687	0.991043	0	0.00568103	0.0019017	0.965216	0.983509	0	0.0131057	0.0103797	0.918851	0.957425	0
G1	_	SPAC1687.18c	SPAC1687.18c_G1	ssl3	1813	7.1426	0.000838363	7.36507e-05	0.993153	0.999334	0	0.0920315	0.876485	0.349166	0.53937	0	0.0541889	0.307504	0.579216	0.747363	0
G1	_	SPAC323.05c	SPAC323.05c_G1	mtq2	1964	5.64676	0.221224	3.37263	0.0662879	0.758777	0	0.308616	6.4532	0.0110753	0.044069	1	0.277203	5.31609	0.0211293	0.0837026	0
G1	_	SPAC1687.20c	SPAC1687.20c_G1	mis6	2175	5.36577	0.0386679	0.0886623	0.765885	0.995634	0	0.124646	0.902806	0.34203	0.533386	0	0.0751347	0.335932	0.562187	0.734158	0
G1	_	SPAC1687.21	SPAC1687.21_G1		872	8.34155	0.062388	0.382309	0.53637	0.995634	0	-0.317676	9.70311	0.00183957	0.0102294	-1	-0.125432	1.53284	0.215686	0.413894	0
G1	_	SPAC1687.22c	SPAC1687.22c_G1	puf3	3541	6.77869	-0.229556	4.05855	0.0439482	0.650791	0	-0.143765	1.57594	0.209346	0.384743	0	-0.180559	2.51457	0.112798	0.267363	0
G1	_	SPAC16A10.01	SPAC16A10.01_G1		3432	5.29664	0.194984	1.01676	0.313288	0.973112	0	-0.0170138	0.00749971	0.930989	0.963969	0	0.169912	0.767377	0.38103	0.587866	0
G1	_	SPAC16A10.02	SPAC16A10.02_G1	sub1	2515	6.63637	0.0714452	0.378862	0.538213	0.995634	0	0.244621	4.42404	0.035436	0.107284	0	0.188693	2.64589	0.103818	0.254849	0
G1	_	SPAC16A10.03c	SPAC16A10.03c_G1		4043	6.99031	0.144845	2.17631	0.14015	0.905888	0	0.0224684	0.0510024	0.821328	0.90005	0	-0.0632109	0.407348	0.523318	0.704995	0
G1	_	SPAC16A10.04	SPAC16A10.04_G1	rho4	1287	5.23571	0.0941619	0.376779	0.539332	0.995634	0	0.354601	5.35435	0.0206706	0.0712165	0	0.200839	1.73394	0.187908	0.378048	0
G1	_	SPAC16A10.05c	SPAC16A10.05c_G1	dad1	734	4.54095	0.156914	0.862754	0.352969	0.983969	0	-0.214256	1.47803	0.224083	0.403361	0	-0.215874	1.55308	0.212681	0.409863	0
G1	_	SPAC16A10.06c	SPAC16A10.06c_G1	nse2	1043	5.35536	-0.0750042	0.332908	0.563952	0.995634	0	0.0419466	0.102341	0.749039	0.858177	0	0.206624	2.6236	0.105286	0.257142	0
G1	_	SPAC16A10.07c	SPAC16A10.07c_G1	taz1	2550	7.07342	0.0101804	0.0099218	0.920655	0.995634	0	0.0340007	0.109164	0.741097	0.853133	0	-0.138365	1.8128	0.178172	0.364785	0
G1	_	SPAC3A11.14c	SPAC3A11.14c_G1	pkl1	3050	6.50158	0.106894	0.718841	0.396524	0.991043	0	0.388103	9.4679	0.00209099	0.0114554	1	0.250858	3.97966	0.046053	0.145986	0
G1	_	SPAC16C9.01c	SPAC16C9.01c_G1		1831	6.02635	0.222773	4.01491	0.0450996	0.657301	0	0.115923	1.04642	0.306333	0.494918	0	-0.0244005	0.0465779	0.829129	0.908259	0
G1	_	SPAC16C9.02c	SPAC16C9.02c_G1	mta1	1269	8.23483	0.0685658	0.614926	0.432939	0.995634	0	0.063709	0.525825	0.468368	0.649394	0	-0.0570539	0.422263	0.51581	0.699386	0
G1	_	SPAC16C9.03	SPAC16C9.03_G1	nmd3	1956	6.97532	0.00138168	0.000147106	0.990323	0.999311	0	0.665442	35.1298	3.08439e-09	7.73194e-08	1	0.663319	35.0892	3.14949e-09	9.48935e-08	1
G1	_	SPAC3A12.09c	SPAC3A12.09c_G1	ure4	1996	5.22991	0.120296	0.767136	0.381105	0.991043	0	0.391683	8.17953	0.00423658	0.0203142	1	0.279498	4.20708	0.0402555	0.132919	0
G1	_	SPAC16C9.04c	SPAC16C9.04c_G1	mot2	1820	5.62378	0.00662735	0.00317773	0.955046	0.995634	0	-0.118431	0.966115	0.325651	0.51797	0	-0.14765	1.54008	0.214606	0.412683	0
G1	_	SPAC16C9.05	SPAC16C9.05_G1	cph1	1641	7.63316	0.115434	1.26724	0.260285	0.952251	0	-0.459267	19.2363	1.15498e-05	0.000136057	-1	-0.373051	12.932	0.000323015	0.00293807	-1
G1	_	SPAC16C9.06c	SPAC16C9.06c_G1	upf1	2983	7.36055	0.0325651	0.135462	0.712834	0.995634	0	-0.0846204	0.890624	0.345308	0.535975	0	0.0748803	0.716215	0.397388	0.602427	0
G1	_	SPAC16C9.07	SPAC16C9.07_G1	pom2	3149	6.40648	0.0181923	0.0343035	0.853063	0.995634	0	-0.0963748	0.924954	0.336178	0.528291	0	-0.00853366	0.0075102	0.930941	0.9625	0
G1	_	SPAC16E8.01	SPAC16E8.01_G1	shd1	4782	7.29272	-0.328994	5.12534	0.023579	0.549972	0	-0.115682	0.637033	0.424787	0.610757	0	-0.106783	0.54448	0.460582	0.655122	0
G1	_	SPAC16E8.02	SPAC16E8.02_G1	mpo1	2212	5.11268	0.198385	1.79621	0.180171	0.919597	0	0.323954	4.72645	0.0297021	0.094108	0	0.418102	8.20267	0.00418289	0.0239265	1
G1	_	SPAC16E8.03	SPAC16E8.03_G1	gna1	448	3.79884	0.296603	2.70944	0.0997561	0.839156	0	0.0697996	0.136085	0.712204	0.833319	0	0.191027	1.10135	0.293971	0.501037	0
G1	_	SPAC16E8.04c	SPAC16E8.04c_G1	aro7	1396	7.36309	0.0559093	0.212306	0.644966	0.995634	0	0.309447	6.49072	0.0108439	0.0432584	1	0.474777	15.4032	8.68394e-05	0.000944831	1
G1	_	SPAC16E8.05c	SPAC16E8.05c_G1		1297	3.11426	-0.20534	0.600296	0.438465	0.995634	0	0.765538	9.69367	0.00184904	0.010273	1	0.53061	4.647	0.0311079	0.110706	0
G1	_	SPAC16E8.06c	SPAC16E8.06c_G1	nop12	1519	7.28985	-0.00254386	0.000579291	0.980798	0.9991	0	0.42364	16.2223	5.63268e-05	0.000539756	1	0.170332	2.60677	0.106408	0.259075	0
G1	_	SPAC16E8.07c	SPAC16E8.07c_G1	vph1	2597	8.72279	-0.106204	1.36652	0.242411	0.947728	0	-0.214036	5.49349	0.0190874	0.066736	0	-0.102105	1.26279	0.261124	0.468497	0
G1	_	SPAC16E8.08	SPAC16E8.08_G1	pos1	1389	5.31699	-0.144928	1.15269	0.282987	0.966686	0	0.307804	5.36583	0.020535	0.0708661	0	0.16558	1.56739	0.210586	0.407094	0
G1	_	SPAC16E8.09	SPAC16E8.09_G1	scd1	3025	6.80841	-0.0352286	0.159358	0.689748	0.995634	0	0.0827943	0.869219	0.351172	0.54181	0	0.103809	1.39936	0.236831	0.441529	0
G1	_	SPAC16E8.10c	SPAC16E8.10c_G1	rsm7	1012	6.78236	0.010537	0.0114887	0.914642	0.995634	0	-0.0710545	0.507671	0.476149	0.655836	0	-0.144423	2.11762	0.145613	0.318685	0
G1	_	SPAC3F10.09	SPAC3F10.09_G1	his6	1893	6.92436	0.0768677	0.736533	0.390774	0.991043	0	0.239018	7.07468	0.00781808	0.0333987	1	0.158258	3.1319	0.0767743	0.208288	0
G1	_	SPAC16E8.11c	SPAC16E8.11c_G1	tfb1	1996	5.91257	0.143976	1.77242	0.183083	0.919597	0	0.240643	4.87018	0.0273247	0.0881791	0	0.077284	0.505008	0.477308	0.668961	0
G1	_	SPAC16E8.12c	SPAC16E8.12c_G1	png3	835	5.76954	-0.0371562	0.0996989	0.752191	0.995634	0	0.493713	18.3486	1.83958e-05	0.000204772	1	0.264737	5.26435	0.0217666	0.085417	0
G1	_	SPAC16E8.13	SPAC16E8.13_G1		2649	6.19433	0.0422516	0.166555	0.683192	0.995634	0	-0.143899	1.83682	0.175324	0.341496	0	-0.180769	2.96117	0.0852862	0.224198	0
G1	_	SPAC16E8.14c	SPAC16E8.14c_G1	tae1	922	5.74842	-0.0158742	0.0097148	0.921485	0.995634	0	-0.096156	0.347867	0.555323	0.720676	0	0.126899	0.618914	0.431451	0.63194	0
G1	_	SPAC16E8.15	SPAC16E8.15_G1	tif45	1296	8.73669	0.0368842	0.136936	0.711346	0.995634	0	0.00181024	0.000327598	0.985559	0.993001	0	0.00936472	0.00879915	0.925265	0.960516	0
G1	_	SPAC16E8.16	SPAC16E8.16_G1	sua7	2030	7.97836	-0.0186668	0.0419142	0.837783	0.995634	0	-0.425778	21.1239	4.30515e-06	5.59759e-05	-1	-0.325585	12.549	0.00039641	0.00347941	-1
G1	_	SPAC16E8.17c	SPAC16E8.17c_G1		1461	6.01185	0.234562	4.32048	0.0376563	0.624318	0	0.571014	26.0358	3.35138e-07	5.58593e-06	1	0.541631	23.8465	1.04329e-06	1.8366e-05	1
G1	_	SPAC16E8.18	SPAC16E8.18_G1		324	4.04037	-0.0767869	0.169715	0.680365	0.995634	0	-0.0472967	0.0622972	0.802901	0.888563	0	-0.0446366	0.0575862	0.810353	0.898687	0
G1	_	SPAC16E8.18c	SPAC16E8.18c_G1	tam5	632	4.93734	0.0148864	0.0121701	0.912157	0.995634	0	-0.108679	0.6103	0.434675	0.619538	0	-0.0177703	0.0172389	0.89554	0.945477	0
G1	_	SPAC1705.02	SPAC1705.02_G1		363	6.31561	-0.14418	1.09556	0.295242	0.970725	0	-0.450142	10.2446	0.00137082	0.00816631	-1	-0.39243	7.97289	0.0047483	0.0263341	-1
G1	_	SPAC1705.03c	SPAC1705.03c_G1	ecm33	1955	8.37006	-0.2886	4.06144	0.0438731	0.650791	0	-0.0296359	0.0429696	0.835783	0.906987	0	-0.0428822	0.0895923	0.764696	0.871662	0
G1	_	SPAC1751.01c	SPAC1751.01c_G1	gti1	6908	5.86297	-0.126949	0.44137	0.506462	0.995634	0	-0.142063	0.545649	0.460101	0.641623	0	-0.0771367	0.161725	0.687573	0.825641	0
G1	_	SPAC3G9.03	SPAC3G9.03_G1	rpl2301	580	9.47297	0.119488	1.26226	0.261223	0.953667	0	0.319252	8.98882	0.00271636	0.0142336	1	0.332966	9.77769	0.00176642	0.0118906	1
G1	_	SPAC1751.02c	SPAC1751.02c_G1	rsm19	1197	6.74669	0.125897	1.57911	0.208889	0.932066	0	-0.258574	6.30553	0.0120362	0.0466943	-1	-0.442163	18.5028	1.69652e-05	0.000221042	-1
G1	_	SPAC1751.03	SPAC1751.03_G1	tif313	1357	8.25651	-0.0160125	0.0288424	0.865144	0.995634	0	-0.20285	4.55745	0.0327758	0.101204	0	-0.336163	12.5188	0.000402881	0.00351844	-1
G1	_	SPAC1751.04	SPAC1751.04_G1	loc1	1265	5.74517	-0.0164737	0.00758548	0.930596	0.995634	0	0.816679	19.0919	1.24574e-05	0.000145654	1	0.747446	16.0638	6.12436e-05	0.000696577	1
G1	_	SPAC3G9.10c	SPAC3G9.10c_G1	rrp41	1060	5.83977	0.178234	2.13586	0.14389	0.907732	0	0.413246	11.4924	0.00069883	0.00469911	1	0.317926	6.85588	0.00883499	0.0429216	1
G1	_	SPAC1782.02c	SPAC1782.02c_G1		1087	6.63043	0.0713189	0.533215	0.465258	0.995634	0	-0.151116	2.28142	0.130932	0.280243	0	-0.0639967	0.423032	0.515428	0.699203	0
G1	_	SPAC1782.03	SPAC1782.03_G1	saf3	1804	4.92994	0.161303	1.12716	0.288382	0.969074	0	0.627334	17.6638	2.63589e-05	0.000280937	1	0.447286	9.00076	0.00269867	0.016795	1
G1	_	SPAC1782.04	SPAC1782.04_G1	cox24	1161	6.42501	0.0793264	0.513727	0.47353	0.995634	0	0.2273	4.18196	0.0408564	0.119092	0	0.280902	6.53917	0.0105525	0.0491325	1
G1	_	SPAC1782.05	SPAC1782.05_G1	ypa2	1386	6.81715	-0.0386934	0.153395	0.695312	0.995634	0	-0.305226	9.12524	0.00252106	0.0134121	-1	-0.375444	13.9559	0.000187147	0.00182972	-1
G1	_	SPAC1782.06c	SPAC1782.06c_G1	phb1	1260	7.27864	0.0295467	0.0839728	0.771984	0.995634	0	0.0680341	0.440561	0.506852	0.683053	0	0.040787	0.159736	0.6894	0.826087	0
G1	_	SPAC1782.07	SPAC1782.07_G1	qcr8	608	8.015	0.337742	11.8935	0.000563314	0.0958137	0	0.0961509	0.947713	0.330302	0.522333	0	0.0436229	0.19605	0.657928	0.805015	0
G1	_	SPAC1782.08c	SPAC1782.08c_G1	rex3	1623	6.91401	-0.036376	0.162499	0.686866	0.995634	0	-0.00693672	0.00579623	0.939313	0.967535	0	-0.146723	2.60814	0.106317	0.259054	0
G1	_	SPAC1782.09c	SPAC1782.09c_G1	clp1	1663	5.41472	0.00813805	0.00198532	0.964461	0.995634	0	-0.112087	0.36755	0.544343	0.711714	0	-0.133458	0.526628	0.468028	0.662219	0
G1	_	SPAC3H1.05	SPAC3H1.05_G1	ste24	2189	8.30281	-0.0684651	0.500208	0.479409	0.995634	0	-0.274578	7.91133	0.00491262	0.0229244	-1	-0.242738	6.23788	0.0125046	0.0556948	0
G1	_	SPAC3H1.11	SPAC3H1.11_G1	hsr1	4086	7.97931	-0.490168	12.2171	0.000473541	0.0872848	0	-0.489493	12.1149	0.000500212	0.00354824	-1	-0.446918	10.1078	0.00147644	0.0103732	-1
G1	_	SPAC1782.11	SPAC1782.11_G1	met14	920	8.11869	0.0777009	0.366959	0.544667	0.995634	0	0.14504	1.27053	0.259667	0.444506	0	0.236626	3.40253	0.0650967	0.186454	0
G1	_	SPAC1782.12c	SPAC1782.12c_G1		1682	6.09878	-0.0338117	0.0757532	0.783137	0.995634	0	0.0765406	0.382302	0.536374	0.706483	0	0.157129	1.65156	0.198747	0.392917	0
G1	_	SPAC1783.01	SPAC1783.01_G1		3632	5.59577	-0.0565615	0.118617	0.73054	0.995634	0	0.184949	1.26717	0.260299	0.445344	0	0.325032	3.97255	0.0462478	0.146381	0
G1	_	SPAC1783.02c	SPAC1783.02c_G1	vps66	1288	6.60106	-0.0393642	0.164183	0.685334	0.995634	0	0.0484285	0.244848	0.620727	0.770768	0	-0.0022057	0.000516606	0.981866	0.990342	0
G1	_	SPAC1783.03	SPAC1783.03_G1	fta2	3030	5.64095	0.088959	0.459253	0.497973	0.995634	0	0.160004	1.45998	0.226934	0.40669	0	0.150636	1.32001	0.25059	0.457456	0
G1	_	SPAC1783.04c	SPAC1783.04c_G1	hst4	1495	4.73787	-0.483697	8.5697	0.00341804	0.266804	0	-0.325863	3.85853	0.0494935	0.137856	0	-0.234992	2.08599	0.148655	0.322696	0
G1	_	SPAC1783.05	SPAC1783.05_G1	hrp1	4652	8.35479	-0.00972711	0.0100901	0.919987	0.995634	0	0.096204	0.984114	0.321185	0.512572	0	0.0295848	0.0933948	0.759905	0.869793	0
G1	_	SPAC1783.06c	SPAC1783.06c_G1	atg12	724	3.63411	-0.301681	2.1085	0.146483	0.907732	0	0.367819	3.44507	0.0634406	0.166631	0	0.255462	1.70052	0.19222	0.384547	0
G1	_	SPAC1783.07c	SPAC1783.07c_G1	pap1	2783	7.8766	-0.064606	0.378367	0.538479	0.995634	0	-0.233045	4.84221	0.0277713	0.0894361	0	-0.0822635	0.611902	0.434073	0.633815	0
G1	_	SPAC4A8.10	SPAC4A8.10_G1	rog1	2982	6.32801	-0.167126	3.20018	0.0736302	0.778516	0	-0.238583	6.24608	0.0124469	0.0477969	-1	-0.159993	2.9258	0.0871738	0.227502	0
G1	_	SPAC1783.08c	SPAC1783.08c_G1	rpl1502	866	7.22044	0.152341	1.48317	0.223279	0.942918	0	0.499725	15.9769	6.41204e-05	0.000607931	1	0.419222	11.2676	0.000788697	0.00617845	1
G1	_	SPAC1786.01c	SPAC1786.01c_G1	ptl2	2313	7.41627	0.00983389	0.0107195	0.917538	0.995634	0	-0.32647	11.3829	0.000741229	0.00495233	-1	-0.328474	11.6333	0.000647822	0.00526643	-1
G1	_	SPAC1786.02	SPAC1786.02_G1	plb2	3422	7.02619	-0.510364	7.32418	0.0068033	0.350267	0	-0.1567	0.700554	0.402598	0.591439	0	-0.203616	1.17569	0.278235	0.487885	0
G1	_	SPAC1786.03	SPAC1786.03_G1	cut11	1929	5.86081	-0.205809	3.49186	0.0616712	0.730611	0	-0.159456	2.04279	0.152929	0.311676	0	-0.244814	4.89963	0.0268625	0.099791	0
G1	_	SPAC17A2.01	SPAC17A2.01_G1	bsu1	2386	4.69347	-0.31057	4.23185	0.0396722	0.632252	0	0.127084	0.736539	0.390772	0.580803	0	-0.0437844	0.0881783	0.766506	0.87213	0
G1	_	SPAC17A2.02c	SPAC17A2.02c_G1	tlc4	1849	7.36924	-0.152453	2.10602	0.14672	0.907732	0	-0.0192277	0.0333087	0.855185	0.918662	0	-0.0750932	0.511071	0.474676	0.666994	0
G1	_	SPAC17A2.03c	SPAC17A2.03c_G1	vma6	2146	7.74165	-0.00393184	0.00172939	0.966829	0.996237	0	-0.11462	1.4427	0.229703	0.409894	0	0.0617928	0.427094	0.513418	0.698355	0
G1	_	SPAC17A2.04c	SPAC17A2.04c_G1	cns1	1607	6.64678	-0.0209425	0.0372839	0.846888	0.995634	0	0.110961	1.03662	0.30861	0.498084	0	0.104536	0.932461	0.334224	0.543249	0
G1	_	SPAC4G8.06c	SPAC4G8.06c_G1	trm12	1378	6.39704	0.047066	0.21814	0.640461	0.995634	0	0.301762	8.99628	0.0027053	0.0141994	1	0.199055	3.95952	0.0466069	0.14722	0
G1	_	SPAC4G9.02	SPAC4G9.02_G1	rnh201	1420	6.02861	0.144694	1.45393	0.227898	0.947294	0	0.355408	8.75282	0.00309123	0.0157502	1	0.330532	7.69857	0.00552646	0.0296273	1
G1	_	SPAC4H3.01	SPAC4H3.01_G1		2613	8.5047	0.223397	5.70819	0.0168859	0.495947	0	0.248306	7.00908	0.00810975	0.0343636	1	0.0631981	0.453737	0.500566	0.689612	0
G1	_	SPAC17A2.06c	SPAC17A2.06c_G1	vps8	3882	7.08221	-0.0989397	1.07677	0.299421	0.970858	0	0.0369429	0.149054	0.699441	0.824191	0	0.127548	1.81901	0.177431	0.363624	0
G1	_	SPAC513.05	SPAC513.05_G1	ams1	5799	7.75875	-0.136564	1.68148	0.194728	0.922423	0	-0.318097	8.96895	0.00274606	0.0143413	-1	-0.208119	3.89301	0.0484874	0.151407	0
G1	_	SPAC17A2.07c	SPAC17A2.07c_G1		537	4.01555	-0.110153	0.343071	0.558062	0.995634	0	0.119393	0.402925	0.525582	0.696811	0	0.381662	4.49222	0.0340494	0.118286	0
G1	_	SPAC17A2.08c	SPAC17A2.08c_G1	ntr2	1534	5.66324	-0.0697899	0.374897	0.540347	0.995634	0	0.053727	0.218806	0.639951	0.784841	0	-0.0282935	0.0618453	0.803603	0.896086	0
G1	_	SPAC17A2.09c	SPAC17A2.09c_G1	csx1	2339	7.24857	-0.458493	9.12194	0.00252562	0.243496	0	-0.0753403	0.24846	0.618161	0.768905	0	-0.0452435	0.0894493	0.764878	0.871662	0
G1	_	SPAC17A2.10c	SPAC17A2.10c_G1		693	3.04915	-0.729228	6.41301	0.0113287	0.411059	0	0.00269534	0.000107111	0.991743	0.995874	0	-0.163902	0.357985	0.549628	0.725161	0
G1	_	SPAC17A2.11	SPAC17A2.11_G1		2014	0.804062	-1.09783	3.4753	0.0622915	0.734322	0	0.344372	0.479715	0.488551	0.667261	0	0.418752	0.754252	0.385133	0.591563	0
G1	_	SPAC17A2.12	SPAC17A2.12_G1	rrp1	4235	5.8772	-0.387595	9.18783	0.0024363	0.243496	0	0.176873	1.99596	0.157719	0.31853	0	0.208785	2.8513	0.0913	0.233256	0
G1	_	SPAC17A2.13c	SPAC17A2.13c_G1	rad25	1055	7.43765	-0.111443	1.40054	0.236632	0.947728	0	-0.0486586	0.263959	0.607413	0.760752	0	0.0212385	0.0511989	0.82099	0.904505	0
G1	_	SPAC17A2.14	SPAC17A2.14_G1	mnr2	2611	6.69459	0.0363665	0.164397	0.68514	0.995634	0	-0.204328	4.92195	0.0265175	0.0862853	0	-0.192851	4.49621	0.0339701	0.118141	0
G1	_	SPAC57A10.14	SPAC57A10.14_G1	sgf11	750	6.27789	0.0944146	0.734417	0.391455	0.991043	0	0.282719	6.54476	0.0105193	0.0422865	1	0.335937	9.48722	0.00206908	0.0135637	1
G1	_	SPAC17A5.01	SPAC17A5.01_G1	pex6	3252	6.89371	0.0188193	0.0441745	0.833529	0.995634	0	0.0711353	0.619607	0.431194	0.616539	0	0.185203	4.33315	0.0373769	0.126208	0
G1	_	SPAC17A5.02c	SPAC17A5.02c_G1	dbr1	1773	5.5675	0.124659	0.768832	0.380579	0.991043	0	0.200622	1.95842	0.161683	0.323418	0	0.0675845	0.223799	0.636161	0.790565	0
G1	_	SPAC17A5.03	SPAC17A5.03_G1	rpl301	1315	7.36287	0.0447135	0.133513	0.714817	0.995634	0	-0.105557	0.730237	0.392806	0.581829	0	-0.140129	1.29663	0.25483	0.462101	0
G1	_	SPAC17A5.04c	SPAC17A5.04c_G1	mde10	1682	6.22547	-0.0415774	0.161965	0.687354	0.995634	0	-0.0156923	0.022495	0.880778	0.935248	0	0.118372	1.33423	0.248055	0.455215	0
G1	_	SPAC17A5.05c	SPAC17A5.05c_G1		744	5.11748	0.0234659	0.0315725	0.858969	0.995634	0	0.325414	6.16027	0.0130651	0.0496237	1	0.206582	2.52373	0.112145	0.266755	0
G1	_	SPAC17A5.06	SPAC17A5.06_G1	ptr8	2768	6.55582	-0.145668	1.88764	0.169469	0.919597	0	-0.0233316	0.0479829	0.826611	0.903084	0	-0.00960543	0.00829539	0.92743	0.961374	0
G1	_	SPAC17A5.07c	SPAC17A5.07c_G1	ulp2	2067	5.97081	-0.17047	1.91887	0.165981	0.919597	0	0.194213	2.52866	0.111795	0.252475	0	0.120157	0.982687	0.321536	0.53168	0
G1	_	SPAC17A5.08	SPAC17A5.08_G1	erp2	1201	7.5553	-0.00270531	0.000875905	0.976389	0.9991	0	-0.0645035	0.488151	0.484753	0.664468	0	0.00216272	0.000556702	0.981176	0.990182	0
G1	_	SPAC17A5.09c	SPAC17A5.09c_G1	glc8	1405	6.31175	0.0945139	0.940507	0.332148	0.981167	0	-0.329998	10.5673	0.00115103	0.00714207	-1	-0.334587	11.1804	0.000826652	0.00641167	-1
G1	_	SPAC17A5.10	SPAC17A5.10_G1	hua1	1905	4.6444	0.091625	0.305977	0.58016	0.995634	0	0.028383	0.028219	0.866595	0.925835	0	0.0634209	0.145871	0.702513	0.835259	0
G1	_	SPAC17A5.11	SPAC17A5.11_G1	rec12	1038	3.39848	0.210341	0.669421	0.413253	0.993772	0	-0.077527	0.0849354	0.770717	0.870233	0	0.0500737	0.0366305	0.848219	0.918277	0
G1	_	SPAC17A5.12	SPAC17A5.12_G1	ucp7	2094	5.55177	-0.238835	2.94139	0.0863363	0.804915	0	-0.0586329	0.176073	0.67477	0.80621	0	-0.0397832	0.0830626	0.773189	0.876701	0
G1	_	SPAC17A5.13	SPAC17A5.13_G1	fol2	708	6.4857	0.0578355	0.321343	0.570802	0.995634	0	0.225428	4.84875	0.0276661	0.0892349	0	0.219312	4.68149	0.0304893	0.109374	0
G1	_	SPAC17A5.14	SPAC17A5.14_G1	exo2	4208	7.65099	0.0485205	0.247284	0.618994	0.995634	0	-0.0432943	0.193847	0.659734	0.796025	0	0.00858008	0.00770449	0.930055	0.962142	0
G1	_	SPAC17A5.15c	SPAC17A5.15c_G1	gus1	2234	9.14053	-0.0698814	0.627166	0.428397	0.995634	0	-0.293811	10.9614	0.000930298	0.0060043	-1	-0.273139	9.51148	0.0020419	0.0133996	-1
G1	_	SPAC57A7.04c	SPAC57A7.04c_G1	pabp	4616	8.04698	-0.19191	2.64073	0.104155	0.850885	0	-0.335941	7.99304	0.00469575	0.0220787	-1	-0.241589	4.1665	0.0412308	0.135214	0
G1	_	SPAC17A5.18c	SPAC17A5.18c_G1	rec25	2606	3.82559	0.230461	0.771088	0.379881	0.991043	0	0.974605	14.5235	0.000138421	0.00118671	1	0.72658	8.0444	0.00456445	0.0257207	1
G1	_	SPAC17A5.19	SPAC17A5.19_G1		628	3.05799	-0.327039	2.05825	0.151384	0.912912	0	0.137626	0.387563	0.533583	0.704759	0	0.0649047	0.0893682	0.764982	0.871662	0
G1	_	SPAC17C9.01c	SPAC17C9.01c_G1	nuc2	2357	5.92658	0.0134962	0.0178226	0.893797	0.995634	0	0.253431	6.3038	0.012048	0.0466943	1	0.222883	5.01563	0.0251195	0.09512	0
G1	_	SPAC17C9.02c	SPAC17C9.02c_G1	lys7	1365	5.81174	0.00990155	0.00427994	0.947839	0.995634	0	0.260753	2.95487	0.085619	0.209272	0	0.319305	4.53101	0.0332859	0.116734	0
G1	_	SPAC17C9.03	SPAC17C9.03_G1	tif471	4686	9.29176	-0.200221	3.35168	0.0671365	0.759235	0	-0.0318875	0.0850466	0.770571	0.870233	0	0.00300214	0.000756168	0.978062	0.987994	0
G1	_	SPAC17C9.05c	SPAC17C9.05c_G1	pmc3	1242	4.63729	0.148992	0.765839	0.381507	0.991043	0	0.453734	7.1675	0.00742362	0.0320192	1	0.30429	3.25291	0.071297	0.198251	0
G1	_	SPAC17C9.06	SPAC17C9.06_G1	sam50	1949	6.21906	0.0417262	0.143713	0.704617	0.995634	0	0.0454071	0.166331	0.683394	0.813298	0	0.111072	1.0232	0.311761	0.52136	0
G1	_	SPAC17C9.07	SPAC17C9.07_G1	alg8	2062	6.35831	-0.0234864	0.0669538	0.795825	0.995634	0	-0.292866	9.71513	0.00182757	0.0101989	-1	-0.357142	14.7724	0.000121296	0.00125855	-1
G1	_	SPAC17C9.08	SPAC17C9.08_G1	pnu1	1286	7.19025	0.0419169	0.160607	0.688598	0.995634	0	0.0961506	0.836291	0.36046	0.550493	0	-0.0144766	0.0190505	0.890222	0.942402	0
G1	_	SPAC17C9.09c	SPAC17C9.09c_G1	tim13	819	6.98827	0.00719799	0.00590133	0.938767	0.995634	0	-0.279938	8.50908	0.00353379	0.0175346	-1	-0.227145	5.73883	0.0165938	0.0692368	0
G1	_	SPAC17C9.10	SPAC17C9.10_G1	stm1	2046	6.36358	0.045642	0.121896	0.726988	0.995634	0	-0.411592	9.4678	0.0020911	0.0114554	-1	-0.562112	17.653	2.651e-05	0.000328986	-1
G1	_	SPAC17C9.11c	SPAC17C9.11c_G1		1493	5.84118	0.0254412	0.0373376	0.846779	0.995634	0	0.155231	1.37544	0.24088	0.423567	0	0.0868032	0.436092	0.509015	0.695526	0
G1	_	SPAC17C9.12	SPAC17C9.12_G1	scs22	1726	6.64966	-0.150747	1.772	0.183135	0.919597	0	0.0850977	0.564086	0.452618	0.635857	0	0.00907229	0.00647021	0.935889	0.965421	0
G1	_	SPAC17C9.13c	SPAC17C9.13c_G1	cut8	1529	7.05032	0.0854478	0.791832	0.373547	0.991043	0	0.442132	21.4177	3.69342e-06	4.87298e-05	1	0.260994	7.46928	0.00627607	0.0326679	1
G1	_	SPAC630.08c	SPAC630.08c_G1	erg25	1629	7.15377	-0.328347	5.49429	0.0190787	0.512588	0	-0.459054	10.6165	0.0011208	0.00698912	-1	-0.367627	6.85726	0.0088282	0.0429216	-1
G1	_	SPAC17C9.14	SPAC17C9.14_G1	pex19	1036	6.27792	-0.0291365	0.0896238	0.764656	0.995634	0	0.613091	42.2587	7.99615e-11	2.63747e-09	1	0.474783	25.5029	4.41713e-07	8.51759e-06	1
G1	_	SPAC630.09c	SPAC630.09c_G1	mug58	1467	6.10105	0.320219	9.0682	0.00260093	0.243496	0	0.389605	13.1823	0.000282612	0.002192	1	0.422615	15.943	6.528e-05	0.000737134	1
G1	_	SPAC17C9.15c	SPAC17C9.15c_G1	dhm2	1511	6.23697	0.0922401	0.758863	0.383685	0.991043	0	0.0130932	0.0147689	0.903273	0.948687	0	-0.060629	0.319994	0.571611	0.741368	0
G1	_	SPAC694.02	SPAC694.02_G1		5465	10.0836	-0.122236	1.53768	0.214964	0.934145	0	-0.309115	9.77529	0.00176873	0.00994137	-1	-0.234591	5.64974	0.0174579	0.072114	0
G1	_	SPAC17C9.16c	SPAC17C9.16c_G1	mfs1	2220	6.85231	0.191616	1.40025	0.236682	0.947728	0	-0.171783	1.10496	0.29318	0.48059	0	-0.192308	1.39168	0.238121	0.442952	0
G1	_	SPAC17D4.01	SPAC17D4.01_G1	pex7	1384	8.50039	-0.171445	1.35083	0.245133	0.947728	0	-0.614083	17.0769	3.58969e-05	0.000362264	-1	-0.703521	22.2473	2.39699e-06	3.89169e-05	-1
G1	_	SPAC17D4.02	SPAC17D4.02_G1	cdc45	2064	6.30943	0.00765118	0.00363963	0.951893	0.995634	0	0.757036	37.114	1.11424e-09	2.97146e-08	1	0.759115	37.6512	8.45935e-10	2.83501e-08	1
G1	_	SPAC17D4.03c	SPAC17D4.03c_G1	cis4	2628	6.55614	-0.0487542	0.219874	0.639136	0.995634	0	-0.0530991	0.25513	0.613485	0.764357	0	0.0469755	0.205851	0.650039	0.800195	0
G1	_	SPAC17D4.04	SPAC17D4.04_G1	trm401	2285	6.95807	-0.0265632	0.0724744	0.787768	0.995634	0	0.10336	1.08944	0.296595	0.484243	0	0.0235163	0.0568232	0.811589	0.899104	0
G1	_	SPAC17G6.03	SPAC17G6.03_G1		4628	5.81918	0.0494622	0.145908	0.702477	0.995634	0	0.104311	0.635662	0.425286	0.611093	0	0.122389	0.89186	0.344974	0.553174	0
G1	_	SPAC694.06c	SPAC694.06c_G1	mrc1	3251	6.05707	0.068664	0.341084	0.559204	0.995634	0	0.299337	6.47955	0.0109122	0.0435032	1	0.229963	3.88081	0.048841	0.152055	0
G1	_	SPAC6G9.01c	SPAC6G9.01c_G1		833	6.08408	0.339132	5.97539	0.0145069	0.46385	0	0.481229	11.9046	0.000559969	0.00389493	1	0.493015	12.7258	0.000360637	0.00322873	1
G1	_	SPAC17G6.04c	SPAC17G6.04c_G1	cpp1	3460	6.76194	-0.0871413	0.548504	0.45893	0.995634	0	-0.0498067	0.176726	0.674202	0.80588	0	0.0445341	0.143816	0.704517	0.837323	0
G1	_	SPAC17G6.05c	SPAC17G6.05c_G1	bro1	2477	5.56845	0.0127269	0.0107877	0.917277	0.995634	0	-0.160119	1.6161	0.203637	0.378267	0	-0.175134	1.99007	0.158334	0.336593	0
G1	_	SPAC17G6.06	SPAC17G6.06_G1	rps2401	681	9.79432	0.0871321	0.710163	0.39939	0.991347	0	0.0187904	0.0329105	0.856044	0.918949	0	0.0804384	0.604101	0.437018	0.636041	0
G1	_	SPAC17G6.07c	SPAC17G6.07c_G1	use1	1219	6.44844	-0.0155922	0.0181265	0.892901	0.995634	0	-0.0292041	0.0621273	0.803165	0.888563	0	-0.10488	0.809978	0.368127	0.57633	0
G1	_	SPAC17G6.08	SPAC17G6.08_G1	pep7	2231	6.06333	0.0828172	0.490087	0.483889	0.995634	0	0.151403	1.60727	0.204876	0.379753	0	0.0770441	0.422045	0.515918	0.699386	0
G1	_	SPAC7D4.11c	SPAC7D4.11c_G1	sec39	2578	6.77214	-0.0911233	0.844844	0.358015	0.983969	0	-0.283328	7.85339	0.00507255	0.0235131	-1	-0.224252	5.04742	0.0246627	0.0940153	0
G1	_	SPAC17G6.09	SPAC17G6.09_G1	sec62	1501	6.90433	0.0229035	0.0427936	0.836114	0.995634	0	-0.590112	26.8373	2.21324e-07	3.83159e-06	-1	-0.555212	24.14	8.95808e-07	1.59944e-05	-1
G1	_	SPAC17G6.10	SPAC17G6.10_G1	ssr1	1834	6.58966	0.111308	1.15633	0.282229	0.966527	0	0.0374211	0.127115	0.721442	0.839276	0	-0.0292807	0.0785596	0.779259	0.881051	0
G1	_	SPAC17G6.11c	SPAC17G6.11c_G1	gls1	3728	7.55371	-0.137342	1.99151	0.158183	0.919597	0	-0.461059	21.7421	3.11878e-06	4.16746e-05	-1	-0.479471	23.7434	1.10074e-06	1.92958e-05	-1
G1	_	SPAC17G6.12	SPAC17G6.12_G1	cul1	2346	6.51055	0.0346276	0.13705	0.711231	0.995634	0	0.000260834	7.55445e-06	0.997807	0.999209	0	0.0034393	0.00134367	0.970759	0.983349	0
G1	_	SPAC17G6.13	SPAC17G6.13_G1	slt1	1516	9.44442	0.0900279	0.526325	0.468156	0.995634	0	-0.508734	16.555	4.72598e-05	0.000462055	-1	-0.444628	12.6977	0.000366112	0.00325913	-1
G1	_	SPAC17G6.14c	SPAC17G6.14c_G1	uap56	1862	8.50616	-0.052261	0.27526	0.599825	0.995634	0	-0.111985	1.25323	0.262937	0.447512	0	-0.111548	1.24991	0.26357	0.471267	0
G1	_	SPAC17G6.15c	SPAC17G6.15c_G1	fsf1	1602	6.90741	-0.0958973	0.548209	0.45905	0.995634	0	0.223561	2.98036	0.0842803	0.206888	0	0.246209	3.66225	0.0556585	0.166896	0
G1	_	SPAC17G6.16c	SPAC17G6.16c_G1	ysh1	2660	7.65769	0.023717	0.0490451	0.824733	0.995634	0	-0.434185	15.947	6.51402e-05	0.000614809	-1	-0.519987	22.9333	1.6772e-06	2.82555e-05	-1
G1	_	SPAC17G6.17	SPAC17G6.17_G1	pof8	1630	5.99965	0.137749	1.05493	0.304375	0.970858	0	0.4073	9.22216	0.00239104	0.0128403	1	0.40252	9.1315	0.00251246	0.0158406	1
G1	_	SPAC17G8.01c	SPAC17G8.01c_G1	trl1	2650	6.8658	0.00982061	0.010109	0.919913	0.995634	0	0.415924	18.408	1.78307e-05	0.000199623	1	0.365571	14.3874	0.000148796	0.00150891	1
G1	_	SPAC17G8.02	SPAC17G8.02_G1	urh2	1980	5.66381	0.0267677	0.0466127	0.829066	0.995634	0	-0.0629808	0.2476	0.61877	0.768953	0	0.116786	0.893082	0.344643	0.553106	0
G1	_	SPAC17G8.03c	SPAC17G8.03c_G1	bur6	1388	5.42942	0.00980508	0.00590574	0.938744	0.995634	0	0.165831	1.67424	0.195691	0.367216	0	0.0377069	0.0875589	0.767304	0.872563	0
G1	_	SPAC17G8.04c	SPAC17G8.04c_G1	arc5	1196	7.48959	-0.080319	0.581906	0.445566	0.995634	0	-0.210043	3.89939	0.0483036	0.135082	0	0.003599	0.00116942	0.97272	0.984373	0
G1	_	SPAC17G8.05	SPAC17G8.05_G1	med20	1120	5.71341	0.0210302	0.0318418	0.858375	0.995634	0	0.0302281	0.0637776	0.800622	0.887265	0	-0.0726658	0.373995	0.540835	0.717566	0
G1	_	SPAC17G8.06c	SPAC17G8.06c_G1	ilv3	2323	8.94736	0.0872117	0.386745	0.534015	0.995634	0	0.0974545	0.48165	0.487676	0.666956	0	-0.0774399	0.302614	0.582249	0.749067	0
G1	_	SPAC17G8.07	SPAC17G8.07_G1	yaf9	1085	5.82358	-0.167685	1.94713	0.162897	0.919597	0	-0.0951029	0.615673	0.43266	0.61793	0	-0.211363	3.07165	0.0796687	0.213826	0
G1	_	SPAC17G8.08c	SPAC17G8.08c_G1	gdt2	1053	7.5901	0.0484292	0.225077	0.635199	0.995634	0	0.043805	0.18179	0.669839	0.803115	0	0.123187	1.45812	0.227229	0.430355	0
G1	_	SPAC17G8.09	SPAC17G8.09_G1	shg1	915	3.82777	-0.243316	1.27781	0.258306	0.951104	0	0.10455	0.239914	0.624268	0.773027	0	0.0998827	0.226365	0.634232	0.78942	0
G1	_	SPAC17G8.10c	SPAC17G8.10c_G1	dma1	1844	4.58502	-0.160426	0.820587	0.365009	0.988552	0	0.0637763	0.129817	0.718622	0.83847	0	0.0929975	0.284495	0.59377	0.757154	0
G1	_	SPAC17G8.11c	SPAC17G8.11c_G1	imt3	2048	5.98181	-0.00220441	0.000267498	0.986951	0.9991	0	-0.0220411	0.0263559	0.871034	0.928994	0	0.00847103	0.00397974	0.949699	0.971716	0
G1	_	SPAC17G8.12	SPAC17G8.12_G1	sec3	3740	6.41276	-0.019989	0.0379595	0.845524	0.995634	0	0.153421	2.22433	0.135852	0.287908	0	0.0597209	0.341139	0.559172	0.73181	0
G1	_	SPAC17G8.13c	SPAC17G8.13c_G1	mst2	3447	6.47476	-0.10568	1.02395	0.311583	0.973112	0	0.0329349	0.0985244	0.753608	0.861207	0	-0.0310396	0.0885834	0.765986	0.87213	0
G1	_	SPAC17G8.14c	SPAC17G8.14c_G1	pck1	3328	6.72706	-0.00247484	0.000492605	0.982293	0.9991	0	0.0988463	0.777809	0.377812	0.567397	0	0.0489231	0.193162	0.660298	0.806959	0
G1	_	SPAC17G8.15	SPAC17G8.15_G1	wip1	222	3.02537	0.111544	0.186695	0.665682	0.995634	0	0.0708464	0.0713094	0.78944	0.88048	0	0.325112	1.64463	0.199691	0.394159	0
G1	_	SPAC17H9.01	SPAC17H9.01_G1	cid16	4156	7.17416	-0.216597	4.39287	0.0360895	0.611278	0	-0.0588498	0.32292	0.569858	0.731374	0	-0.0227451	0.0489711	0.824863	0.906597	0
G1	_	SPAC17H9.02	SPAC17H9.02_G1	mtl1	3364	7.30842	-0.122752	1.77582	0.182663	0.919597	0	0.11257	1.49437	0.221539	0.39965	0	0.159987	3.07385	0.0795606	0.213627	0
G1	_	SPAC17H9.03c	SPAC17H9.03c_G1	rdl1	1236	4.94609	-0.0364529	0.0776533	0.780503	0.995634	0	-0.0407162	0.0928414	0.760596	0.865068	0	-0.08062	0.376298	0.539591	0.71705	0
G1	_	SPAC17H9.04c	SPAC17H9.04c_G1	dri1	2559	7.08723	-0.128954	1.65007	0.198949	0.927787	0	0.522623	27.9814	1.22488e-07	2.23799e-06	1	0.519736	28.003	1.21129e-07	2.57327e-06	1
G1	_	SPAC17H9.05	SPAC17H9.05_G1	ebp2	3346	8.08221	0.0477244	0.207769	0.648522	0.995634	0	0.58084	30.9067	2.7073e-08	5.67447e-07	1	0.463382	19.7181	8.97452e-06	0.000124157	1
G1	_	SPAC17H9.06c	SPAC17H9.06c_G1		2743	5.97407	0.0446948	0.0909542	0.762968	0.995634	0	0.467468	10.0801	0.00149878	0.00874566	1	0.386127	6.90439	0.00859842	0.0422306	1
G1	_	SPAC17H9.07	SPAC17H9.07_G1	srp21	1077	6.87077	0.0564238	0.191751	0.661464	0.995634	0	0.107743	0.69135	0.405706	0.594194	0	0.194264	2.27177	0.131749	0.296578	0
G1	_	SPAC17H9.08	SPAC17H9.08_G1		2677	6.21859	0.144425	1.38447	0.239341	0.947728	0	0.274413	4.95789	0.0259719	0.0848305	0	0.164132	1.78092	0.182037	0.370037	0
G1	_	SPAC17H9.09c	SPAC17H9.09c_G1	ras1	1137	6.56097	-0.00173783	0.000185024	0.989147	0.999311	0	0.0745992	0.335674	0.562337	0.725883	0	0.142212	1.23766	0.265922	0.473386	0
G1	_	SPAC17H9.10c	SPAC17H9.10c_G1	ddb1	4032	7.95383	0.000176028	2.95683e-06	0.998628	0.999966	0	0.102023	0.989559	0.31985	0.511092	0	0.116056	1.28962	0.256118	0.463364	0
G1	_	SPAC17H9.11	SPAC17H9.11_G1	gmf1	999	6.41489	-0.0418208	0.137364	0.710916	0.995634	0	-0.108678	0.902702	0.342058	0.533386	0	-0.158807	1.95754	0.161777	0.341435	0
G1	_	SPAC17H9.12c	SPAC17H9.12c_G1	cyc2	1136	6.48329	0.0285872	0.0758899	0.782947	0.995634	0	0.518124	25.6103	4.17794e-07	6.78319e-06	1	0.336832	10.8237	0.00100208	0.00750457	1
G1	_	SPAC17H9.13c	SPAC17H9.13c_G1	pro2	1593	6.8045	0.00237423	0.00062166	0.980108	0.9991	0	-0.0584871	0.367179	0.544546	0.711714	0	-0.107158	1.25005	0.263543	0.471267	0
G1	_	SPAC823.16c	SPAC823.16c_G1	atg1802	1593	5.58463	0.175135	2.32295	0.127478	0.889217	0	0.309875	7.17158	0.00740674	0.0319705	1	0.342257	9.097	0.00256029	0.0161098	1
G1	_	SPAC17H9.14c	SPAC17H9.14c_G1	pdi2	1219	9.16266	0.0612531	0.428472	0.512739	0.995634	0	-0.250689	7.09114	0.00774658	0.0331708	-1	-0.208029	4.90612	0.0267617	0.0996529	0
G1	_	SPAC17H9.16	SPAC17H9.16_G1	tom22	1087	7.40563	0.0160121	0.0309479	0.860357	0.995634	0	-0.434586	21.6873	3.20907e-06	4.27899e-05	-1	-0.416895	20.2829	6.67953e-06	9.53545e-05	-1
G1	_	SPAC17H9.17c	SPAC17H9.17c_G1	mdm10	1193	5.33144	-0.0954335	0.508204	0.475917	0.995634	0	0.292478	4.87924	0.0271816	0.087853	0	0.209588	2.54916	0.110353	0.264772	0
G1	_	SPAC17H9.19c	SPAC17H9.19c_G1	cdt2	1906	6.48385	0.00364935	0.00139087	0.97025	0.996661	0	-0.12457	1.55582	0.212278	0.388309	0	-0.0254145	0.0669191	0.795877	0.891204	0
G1	_	SPAC8E11.07c	SPAC8E11.07c_G1	alp31	771	6.66303	-0.129016	1.24254	0.264982	0.954461	0	-0.38949	10.907	0.000958027	0.0061579	-1	-0.234299	4.06206	0.0438569	0.141312	0
G1	_	SPAC17H9.20	SPAC17H9.20_G1	psc3	3989	6.88675	-0.0216447	0.0452044	0.831629	0.995634	0	0.240408	5.5892	0.0180716	0.0638774	0	0.174826	2.98207	0.0841914	0.222066	0
G1	_	SPAC1805.01c	SPAC1805.01c_G1	ppk6	2704	7.33105	0.0736165	0.716308	0.397358	0.991338	0	0.0899146	1.05094	0.305291	0.493871	0	0.099524	1.30844	0.252677	0.459927	0
G1	_	SPAC1805.02c	SPAC1805.02c_G1	etf2	1137	8.11777	0.00952542	0.00800155	0.928723	0.995634	0	-0.147455	1.89161	0.169021	0.334571	0	-0.13629	1.62386	0.202554	0.397196	0
G1	_	SPAC1805.03c	SPAC1805.03c_G1	trm13	1886	4.85884	0.106607	0.490567	0.483674	0.995634	0	-0.0134796	0.00748599	0.931052	0.963969	0	0.0487745	0.10193	0.749525	0.864499	0
G1	_	SPAC1805.04	SPAC1805.04_G1	nup132	5862	7.34959	-0.131922	2.07055	0.150168	0.912912	0	-0.130606	1.99552	0.157765	0.31853	0	0.0206791	0.0512783	0.820854	0.904505	0
G1	_	SPAC1805.05	SPAC1805.05_G1	cki3	1781	7.64764	0.00830866	0.00867935	0.925774	0.995634	0	-0.106292	1.39143	0.238163	0.420087	0	-0.0622184	0.483709	0.486747	0.677575	0
G1	_	SPAC1805.06c	SPAC1805.06c_G1	hem2	1540	7.52643	0.100452	1.03924	0.307998	0.972867	0	-0.160105	2.57248	0.108737	0.248525	0	-0.11836	1.42382	0.232776	0.437121	0
G1	_	SPAC1805.07c	SPAC1805.07c_G1	dad2	858	4.78976	0.00695869	0.00245855	0.960454	0.995634	0	-0.170138	1.36945	0.241907	0.424897	0	-0.182235	1.63503	0.201009	0.395394	0
G1	_	SPAC1805.08	SPAC1805.08_G1	dlc1	588	6.90865	-0.0973118	0.723242	0.395083	0.991043	0	-0.178009	2.37181	0.123544	0.269006	0	-0.177394	2.3875	0.122309	0.282741	0
G1	_	SPAC1805.09c	SPAC1805.09c_G1	fmt1	1174	3.20583	0.0777659	0.0828509	0.773471	0.995634	0	0.318084	1.39727	0.237181	0.418591	0	0.580205	4.97615	0.0256991	0.0965565	0
G1	_	SPAC1805.10	SPAC1805.10_G1		3796	5.64589	0.0318967	0.0777606	0.780355	0.995634	0	0.143212	1.54145	0.214402	0.390826	0	-0.0375029	0.106283	0.744417	0.861247	0
G1	_	SPAC1805.11c	SPAC1805.11c_G1	rps2602	606	5.95231	0.0478008	0.111397	0.738559	0.995634	0	-0.366492	6.17403	0.0129639	0.0492989	-1	0.0273935	0.0364631	0.848562	0.918323	0
G1	_	SPAC8E11.08c	SPAC8E11.08c_G1		1308	4.58562	-0.388799	5.01389	0.0251448	0.560791	0	-0.471101	7.0379	0.00798027	0.0339527	-1	-0.285455	2.72461	0.0988124	0.246376	0
G1	_	SPAC1805.13	SPAC1805.13_G1	rpl14	607	7.48292	0.135891	1.27296	0.259213	0.951104	0	0.110246	0.829573	0.362396	0.552588	0	0.130882	1.17834	0.277694	0.487208	0
G1	_	SPAC1805.14	SPAC1805.14_G1		1992	6.32974	0.0525472	0.290936	0.589621	0.995634	0	0.0803576	0.663288	0.415402	0.602365	0	0.0145354	0.0220911	0.881845	0.936984	0
G1	_	SPAC1805.15c	SPAC1805.15c_G1	pub2	2343	5.33372	0.0417872	0.0893702	0.764979	0.995634	0	0.114644	0.661481	0.416038	0.602846	0	0.167655	1.45916	0.227063	0.430171	0
G1	_	SPAC1805.16c	SPAC1805.16c_G1		1550	4.36377	-0.252504	2.67274	0.10208	0.845448	0	-0.343375	4.63489	0.0313282	0.0979604	0	-0.207754	1.82171	0.17711	0.363202	0
G1	_	SPAC959.04c	SPAC959.04c_G1	omh6	2098	6.3391	0.138963	2.00931	0.156337	0.919597	0	0.270487	7.52341	0.00609022	0.0271654	1	0.237823	5.9413	0.0147901	0.0633126	0
G1	_	SPAC1805.18	SPAC1805.18_G1	pop6	288	5.16133	0.241487	2.07955	0.149284	0.910969	0	0.27575	2.65027	0.103533	0.239424	0	0.312956	3.51131	0.0609511	0.178496	0
G1	_	SPAC1834.01	SPAC1834.01_G1	erf1	1936	8.21852	0.00258353	0.000686325	0.9791	0.9991	0	0.253123	6.58391	0.0102905	0.0416068	1	0.387637	15.5782	7.91619e-05	0.000870364	1
G1	_	SPAC1834.02	SPAC1834.02_G1	aro1	4926	9.05433	-0.0719318	0.603904	0.437092	0.995634	0	-0.649508	48.0457	4.16392e-12	1.62083e-10	-1	-0.515711	30.5921	3.18386e-08	8.14418e-07	-1
G1	_	SPAC1834.03c	SPAC1834.03c_G1	hhf1	772	8.22872	0.0244756	0.023153	0.87906	0.995634	0	-0.730511	20.2139	6.9247e-06	8.64484e-05	-1	-0.882548	29.2874	6.23988e-08	1.46462e-06	-1
G1	_	SPAC1834.04	SPAC1834.04_G1	hht1	870	8.1921	0.167094	0.968187	0.325133	0.978678	0	-0.529137	9.53299	0.00201811	0.0111236	-1	-0.834298	23.4524	1.28042e-06	2.19847e-05	-1
G1	_	SPAC1834.05	SPAC1834.05_G1	alg9	2488	7.53369	-0.0220142	0.0479164	0.826729	0.995634	0	-0.119505	1.3886	0.238642	0.420813	0	-0.0900501	0.79765	0.371797	0.579431	0
G1	_	SPAC1834.06c	SPAC1834.06c_G1	pmo25	1404	6.8421	-0.0558675	0.312532	0.576131	0.995634	0	0.0468392	0.21735	0.641067	0.785448	0	-0.0618579	0.381734	0.536677	0.714333	0
G1	_	SPAC1834.07	SPAC1834.07_G1	klp3	2081	5.98823	-0.222977	4.23353	0.039633	0.632252	0	0.0359048	0.110319	0.739781	0.852292	0	-0.00392588	0.00135117	0.970678	0.983349	0
G1	_	SPAC1834.08	SPAC1834.08_G1	mak1	5435	7.98286	-0.0849725	0.761366	0.382901	0.991043	0	-0.140361	2.05352	0.151855	0.310265	0	-0.123317	1.60037	0.205851	0.401515	0
G1	_	SPAC1834.09	SPAC1834.09_G1	mug51	1212	4.63763	-0.123956	0.485436	0.48597	0.995634	0	-0.0896376	0.247701	0.618699	0.768953	0	-0.270601	2.26903	0.131982	0.296875	0
G1	_	SPAC1834.10c	SPAC1834.10c_G1		718	5.76028	-0.05019	0.167709	0.682156	0.995634	0	-0.200912	2.55928	0.109648	0.249516	0	0.0544743	0.199629	0.65502	0.803644	0
G1	_	SPAC9E9.01	SPAC9E9.01_G1		608	2.73344	0.64968	4.75745	0.0291718	0.59357	0	0.782608	6.75857	0.00932987	0.0384167	1	0.566131	3.51783	0.0607117	0.178044	0
G1	_	SPAC1834.13	SPAC1834.13_G1		1131	0.829512	-0.0226958	0.00242207	0.960748	0.995634	0	-0.239749	0.240111	0.624126	0.773004	0	-0.594278	1.38783	0.238771	0.443855	0
G1	_	SPAC1851.02	SPAC1851.02_G1	slc1	1085	7.82469	-0.0874719	0.664428	0.415001	0.994427	0	0.0122196	0.0128751	0.909659	0.952679	0	0.0131002	0.0149143	0.902801	0.950101	0
G1	_	SPAC1851.03	SPAC1851.03_G1	ckb1	3057	7.57855	0.0530623	0.233604	0.628864	0.995634	0	0.0350172	0.100438	0.751305	0.859862	0	0.130294	1.40776	0.235428	0.439508	0
G1	_	SPAC1851.04c	SPAC1851.04c_G1	ric1	3443	7.46301	0.074703	0.586527	0.443765	0.995634	0	-0.142805	2.09014	0.148252	0.305724	0	-0.0955727	0.951203	0.329413	0.539016	0
G1	_	SPAC186.01	SPAC186.01_G1	pfl9	1498	3.72494	0.135754	0.044572	0.832793	0.995634	0	-0.781315	1.4321	0.231423	0.412024	0	-3.15792	17.2412	3.29222e-05	0.000400627	-1
G1	_	SPAC186.04c	SPAC186.04c_G1		1037	2.93308	-0.228094	0.157236	0.691714	0.995634	0	-0.0185767	0.000924006	0.97575	0.988568	0	-2.67767	16.6938	4.3925e-05	0.000520375	-1
G1	_	SPAC186.05c	SPAC186.05c_G1	gdt1	1471	5.6241	-0.426534	0.181054	0.670469	0.995634	0	-0.514805	0.262885	0.608145	0.76088	0	-3.29056	6.20633	0.0127294	0.0565381	0
G1	_	SPAC186.06	SPAC186.06_G1		742	2.44585	-0.121759	0.0594463	0.807373	0.995634	0	-1.68916	9.70843	0.00183425	0.010218	-1	-2.9656	24.9934	5.75264e-07	1.06347e-05	-1
G1	_	SPAC18B11.02c	SPAC18B11.02c_G1	pus9	1362	4.86834	-0.0761013	0.209491	0.647167	0.995634	0	-0.045591	0.0733405	0.786534	0.879273	0	-0.199739	1.41825	0.233692	0.438058	0
G1	_	SPAC18B11.03c	SPAC18B11.03c_G1		2060	5.61146	0.213021	3.20797	0.0732802	0.778516	0	-0.141279	1.30797	0.252763	0.435907	0	-0.231237	3.56816	0.0588974	0.173699	0
G1	_	SPAC18B11.04	SPAC18B11.04_G1	ncs1	1353	6.06328	0.15097	2.11966	0.145419	0.907732	0	0.208223	3.94461	0.0470218	0.132205	0	0.149638	2.08135	0.149108	0.323342	0
G1	_	SPAC18B11.05	SPAC18B11.05_G1	gpi18	1817	6.67297	-0.0765148	0.697648	0.403575	0.992211	0	-0.232091	6.13689	0.013239	0.0500414	0	-0.144799	2.47428	0.115722	0.271521	0
G1	_	SPAC18B11.06	SPAC18B11.06_G1	lcp5	1268	6.12989	0.0726772	0.251556	0.615982	0.995634	0	1.02938	53.0156	3.30918e-13	1.54766e-11	1	0.890057	39.7179	2.93431e-10	1.08812e-08	1
G1	_	SPAC18B11.07c	SPAC18B11.07c_G1	rhp6	748	7.18941	-0.0476475	0.236075	0.627055	0.995634	0	-0.231072	5.37726	0.0204008	0.0705196	0	-0.0630397	0.411918	0.520997	0.703229	0
G1	_	SPAC9G1.11c	SPAC9G1.11c_G1	spn4	1641	6.86719	0.0271726	0.0797387	0.777652	0.995634	0	0.254107	6.97059	0.00828604	0.0349217	1	0.174766	3.33493	0.0678233	0.191809	0
G1	_	SPAC18B11.08c	SPAC18B11.08c_G1	pat10	535	5.68741	0.0687732	0.349155	0.554592	0.995634	0	0.115578	0.960784	0.326989	0.51893	0	0.0406628	0.121189	0.727749	0.853239	0
G1	_	SPAC18B11.09c	SPAC18B11.09c_G1		923	5.44627	-0.113367	0.774077	0.378959	0.991043	0	-0.0491351	0.142149	0.706154	0.828645	0	-0.176614	1.85059	0.173715	0.35822	0
G1	_	SPAC18B11.10	SPAC18B11.10_G1	tup11	2321	6.94101	0.0139829	0.0185752	0.891591	0.995634	0	0.157428	2.34142	0.125975	0.272443	0	0.209152	4.20968	0.0401938	0.132919	0
G1	_	SPAC18B11.11	SPAC18B11.11_G1		4564	6.67714	-0.107061	1.14706	0.284166	0.966686	0	0.00315168	0.000983542	0.974981	0.988562	0	0.00368077	0.00136818	0.970494	0.983349	0
G1	_	SPAC18G6.01c	SPAC18G6.01c_G1		1800	6.67968	0.110145	0.921821	0.336997	0.982694	0	-0.069801	0.359828	0.548602	0.71463	0	0.0103969	0.00814547	0.928087	0.961426	0
G1	_	SPAC18G6.02c	SPAC18G6.02c_G1	chp1	3855	6.09716	-0.0147081	0.014871	0.902941	0.995634	0	0.317593	7.01224	0.00809545	0.0343263	1	0.444505	14.1569	0.000168177	0.00167829	1
G1	_	SPAC18G6.03	SPAC18G6.03_G1	ypt3	1146	7.74726	0.0656191	0.43933	0.507446	0.995634	0	0.205786	4.29921	0.0381301	0.113144	0	0.107286	1.17244	0.278901	0.488505	0
G1	_	SPAC18G6.04c	SPAC18G6.04c_G1	shm2	1901	6.96835	0.06808	0.38435	0.535285	0.995634	0	0.031061	0.0787836	0.778953	0.874401	0	0.0990129	0.811653	0.367632	0.576012	0
G1	_	SPAC18G6.05c	SPAC18G6.05c_G1	gcn1	8171	9.42525	-0.372797	8.68079	0.00321581	0.258378	0	-0.175931	1.93912	0.163764	0.326722	0	-0.0295022	0.0545948	0.815253	0.90125	0
G1	_	SPAC18G6.06	SPAC18G6.06_G1	utp11	1137	6.20473	-0.0361541	0.0986731	0.753428	0.995634	0	0.683947	37.1535	1.09185e-09	2.93675e-08	1	0.347433	9.41725	0.00214954	0.0139742	1
G1	_	SPAC18G6.07c	SPAC18G6.07c_G1	mra1	1534	7.66218	-0.0491869	0.203788	0.651681	0.995634	0	0.126242	1.33712	0.247542	0.430212	0	-0.0192586	0.0310925	0.860034	0.925975	0
G1	_	SPAC9G1.13c	SPAC9G1.13c_G1	swc4	1567	6.23945	0.234833	4.98985	0.0254964	0.562626	0	0.41076	15.1884	9.72973e-05	0.000863686	1	0.275278	6.86232	0.00880324	0.0428671	1
G1	_	SPAC18G6.09c	SPAC18G6.09c_G1	edc1	2554	6.77347	-0.129817	1.54421	0.213993	0.934145	0	0.233622	5.08212	0.0241737	0.0805834	0	0.26804	6.83188	0.00895449	0.0432787	1
G1	_	SPAC18G6.10	SPAC18G6.10_G1	lem2	2512	5.50533	-0.29186	4.70662	0.0300467	0.597787	0	-0.310763	5.17949	0.022855	0.0773393	0	-0.35422	6.86777	0.00877643	0.0428484	-1
G1	_	SPAC18G6.11c	SPAC18G6.11c_G1	rrn3	2454	7.22782	0.0343103	0.119734	0.729323	0.995634	0	0.365246	13.6461	0.000220703	0.0017824	1	0.311747	10.0333	0.00153739	0.0107173	1
G1	_	SPAC18G6.12c	SPAC18G6.12c_G1		1295	4.20012	0.207223	1.1892	0.275491	0.963832	0	-0.232003	1.35295	0.244763	0.427485	0	-0.110563	0.323774	0.569349	0.739658	0
G1	_	SPAC18G6.13	SPAC18G6.13_G1		345	4.07951	0.0401147	0.0340723	0.853553	0.995634	0	0.227158	1.08459	0.297673	0.485339	0	0.197249	0.838732	0.35976	0.568144	0
G1	_	SPAC18G6.14c	SPAC18G6.14c_G1	rps7	807	8.61965	-0.0181058	0.0178854	0.893611	0.995634	0	0.162154	1.42723	0.232217	0.412735	0	0.0891813	0.433015	0.510513	0.695958	0
G1	_	SPAC18G6.15	SPAC18G6.15_G1	mal3	1603	6.9279	-0.0658321	0.50438	0.477582	0.995634	0	-0.238299	6.3681	0.011619	0.0455102	-1	-0.338441	12.9574	0.000318656	0.00291535	-1
G1	_	SPAC1952.01	SPAC1952.01_G1	gab1	1723	5.89417	0.063926	0.265213	0.606561	0.995634	0	0.23701	3.62526	0.0569086	0.153133	0	0.0691445	0.309639	0.577902	0.746437	0
G1	_	SPAC1952.02	SPAC1952.02_G1	tma23	771	6.55818	-0.0207925	0.0480938	0.826414	0.995634	0	0.322032	11.6931	0.000627316	0.00429191	1	0.191179	4.14985	0.0416382	0.136051	0
G1	_	SPAC1952.03	SPAC1952.03_G1	otu2	1440	6.04995	0.132923	1.40265	0.236281	0.947728	0	0.207093	3.34736	0.0673127	0.1736	0	0.133696	1.41334	0.234503	0.438696	0
G1	_	SPAC1952.04c	SPAC1952.04c_G1		550	3.98734	-0.115367	0.365408	0.545518	0.995634	0	0.510741	7.77479	0.00529805	0.024396	1	0.501175	7.75423	0.00535869	0.0290008	1
G1	_	SPAC1952.05	SPAC1952.05_G1	gcn5	2098	6.68466	0.0944207	1.14286	0.285049	0.966686	0	0.0384126	0.182872	0.668917	0.802316	0	-0.0523557	0.344248	0.557388	0.730665	0
G1	_	SPAC1952.06c	SPAC1952.06c_G1		2519	6.54121	0.0179587	0.0346022	0.852432	0.995634	0	0.0486	0.247831	0.618606	0.768953	0	-0.0398528	0.168364	0.68157	0.821673	0
G1	_	SPAC1952.07	SPAC1952.07_G1	rad1	1543	5.76363	0.114102	0.898142	0.34328	0.983844	0	0.0281796	0.0529283	0.818044	0.897686	0	-0.102342	0.704904	0.401141	0.605917	0
G1	_	SPAC1952.08c	SPAC1952.08c_G1		2661	6.4537	0.024518	0.0667823	0.796081	0.995634	0	0.219793	5.34741	0.0207531	0.0714222	0	0.202081	4.62939	0.0314288	0.111531	0
G1	_	SPAC1952.09c	SPAC1952.09c_G1	ach1	2821	6.73434	0.00807746	0.00518461	0.942599	0.995634	0	-0.255243	4.98577	0.0255566	0.0838111	0	-0.236054	4.33941	0.0372397	0.125812	0
G1	_	SPAC1952.10c	SPAC1952.10c_G1		2194	5.06854	-0.000546589	1.42182e-05	0.996991	0.999966	0	-0.152532	1.04017	0.307781	0.497002	0	-0.0682298	0.216528	0.641698	0.794768	0
G1	_	SPAC1952.11c	SPAC1952.11c_G1	ure2	3130	7.0586	-0.0164388	0.0249149	0.874579	0.995634	0	-0.0874322	0.68985	0.406215	0.594648	0	0.0322971	0.0960624	0.756607	0.868276	0
G1	_	SPAC1952.12c	SPAC1952.12c_G1	csn71	1286	4.46646	-0.210107	1.41142	0.234821	0.947728	0	0.117072	0.44549	0.504485	0.681466	0	0.0800957	0.214258	0.643451	0.795994	0
G1	_	SPAC1952.13	SPAC1952.13_G1	ned1	2306	7.23381	-0.0540457	0.334125	0.56324	0.995634	0	-0.292743	9.48454	0.0020721	0.0113811	-1	-0.451675	22.5938	2.00133e-06	3.29196e-05	-1
G1	_	SPAC1952.14c	SPAC1952.14c_G1	mrpl25	799	6.26554	-0.10536	0.960095	0.327163	0.978887	0	-0.213615	3.7976	0.0513261	0.141451	0	-0.179402	2.74796	0.0973785	0.243692	0
G1	_	SPAC1952.15c	SPAC1952.15c_G1	rec24	2291	4.86356	0.0044869	0.000881633	0.976312	0.9991	0	0.384209	6.60705	0.0101576	0.0411671	1	0.227018	2.32373	0.127414	0.289943	0
G1	_	SPAC1952.16	SPAC1952.16_G1	rga9	5037	6.75446	-0.103925	1.27686	0.258483	0.951104	0	0.143213	2.43017	0.11902	0.261719	0	0.169689	3.49471	0.0615654	0.179539	0
G1	_	SPAC1952.17c	SPAC1952.17c_G1	tbc13	2311	6.09617	0.104049	0.619279	0.431315	0.995634	0	0.18076	1.83857	0.175119	0.34138	0	0.157703	1.42302	0.232907	0.437145	0
G1	_	SPAC19A8.01c	SPAC19A8.01c_G1	sec73	4280	6.44371	-0.0736239	0.427986	0.512979	0.995634	0	-0.0698486	0.376623	0.539416	0.708942	0	0.108753	0.945897	0.330766	0.540101	0
G1	_	SPAC19A8.02	SPAC19A8.02_G1	ltc2	3901	7.32331	0.0153467	0.0230214	0.879401	0.995634	0	0.0930233	0.839501	0.359539	0.55024	0	0.0677755	0.450344	0.502172	0.690591	0
G1	_	SPAC19A8.03	SPAC19A8.03_G1	ymr1	2440	6.26724	-0.0623488	0.318088	0.572759	0.995634	0	-0.0214153	0.0367592	0.847956	0.915284	0	0.0226216	0.042215	0.837211	0.913122	0
G1	_	SPACUNK4.16c	SPACUNK4.16c_G1	tps3	3169	9.57859	-0.214161	3.39421	0.0654258	0.75372	0	-0.386418	11.0011	0.000910584	0.00589528	-1	-0.29585	6.46603	0.0109956	0.0508555	0
G1	_	SPAC19A8.04	SPAC19A8.04_G1	erg5	1814	9.23683	0.00762278	0.00306496	0.95585	0.995634	0	-0.164644	1.42124	0.233199	0.41401	0	-0.31866	5.30152	0.0213068	0.0840868	0
G1	_	SPAC19A8.05c	SPAC19A8.05c_G1	sst4	2168	5.929	-0.0267299	0.0474277	0.827601	0.995634	0	-0.0566644	0.207607	0.64865	0.789193	0	0.12906	1.12056	0.289797	0.497578	0
G1	_	SPAC19A8.06	SPAC19A8.06_G1	pbr1	1235	6.60298	0.00804538	0.00468454	0.945432	0.995634	0	0.00421478	0.00126189	0.971663	0.98682	0	0.147779	1.58371	0.208227	0.404537	0
G1	_	SPAC19A8.07c	SPAC19A8.07c_G1	imp4	1146	6.78513	0.015202	0.0190658	0.890178	0.995634	0	1.58208	234.778	5.41165e-53	4.84497e-50	1	1.51281	215.967	6.85743e-49	4.77506e-46	1
G1	_	SPAC19A8.08	SPAC19A8.08_G1	upf2	3486	7.37601	-0.132344	1.38263	0.239654	0.947728	0	0.06646	0.34857	0.554923	0.720676	0	0.081605	0.530321	0.466472	0.660651	0
G1	_	SPAC19A8.09	SPAC19A8.09_G1	yos1	484	4.93326	0.111295	0.502832	0.478258	0.995634	0	0.187786	1.40321	0.236186	0.417423	0	0.00614273	0.00149701	0.969137	0.982652	0
G1	_	SPAC19A8.10	SPAC19A8.10_G1	rfp1	1978	6.47651	0.0577865	0.400665	0.526746	0.995634	0	0.152697	2.74981	0.0972663	0.228817	0	0.134265	2.17537	0.140236	0.310004	0
G1	_	SPAC19A8.11c	SPAC19A8.11c_G1	irc6	5053	5.8423	0.111207	1.08546	0.29748	0.970858	0	0.240701	5.01191	0.0251735	0.0830801	0	0.189434	3.17874	0.0746023	0.203819	0
G1	_	SPAC19A8.12	SPAC19A8.12_G1	dcp2	2886	6.23901	-0.0441243	0.172578	0.677831	0.995634	0	0.159491	2.24896	0.133704	0.284912	0	0.211899	4.08204	0.0433413	0.1403	0
G1	_	SPAC19A8.13	SPAC19A8.13_G1	usp101	1118	5.97201	0.0285714	0.0664446	0.796586	0.995634	0	0.124588	1.24402	0.264698	0.449312	0	0.171496	2.42687	0.119271	0.277839	0
G1	_	SPAPB1A11.04c	SPAPB1A11.04c_G1	mca1	4179	6.34726	0.0704941	0.368653	0.543739	0.995634	0	0.310189	7.14114	0.00753353	0.0324263	1	0.260515	5.10004	0.0239253	0.0917625	0
G1	_	SPAC19A8.14	SPAC19A8.14_G1	pth2	858	6.06602	0.142871	1.83176	0.17592	0.919597	0	-0.0434674	0.161158	0.688093	0.816693	0	-0.344577	9.98599	0.00157736	0.0109472	-1
G1	_	SPAC19A8.15	SPAC19A8.15_G1	trp2	2323	8.62749	-0.0149818	0.0245038	0.87561	0.995634	0	-0.656976	45.7022	1.37665e-11	5.105e-10	-1	-0.547182	32.0254	1.5217e-08	4.09291e-07	-1
G1	_	SPAC19A8.16	SPAC19A8.16_G1	prl65	418	4.59578	0.0293143	0.00906138	0.924163	0.995634	0	-0.476672	2.28506	0.130625	0.279996	0	-0.377387	1.43296	0.231282	0.434922	0
G1	_	SPAC19B12.01	SPAC19B12.01_G1		2703	7.78892	0.0244055	0.0690365	0.792745	0.995634	0	0.482349	27.2379	1.79896e-07	3.16688e-06	1	0.40949	19.7067	9.02829e-06	0.000124404	1
G1	_	SPAC19B12.02c	SPAC19B12.02c_G1	gas1	2220	8.5752	-0.214786	1.76182	0.184398	0.919597	0	0.0151815	0.00881982	0.925178	0.961586	0	-0.041772	0.0660281	0.79721	0.891686	0
G1	_	SPAC19B12.03	SPAC19B12.03_G1	bgs3	7102	8.39636	-0.318185	5.08612	0.024118	0.549972	0	-0.0717594	0.259632	0.610373	0.762449	0	0.0067811	0.00232156	0.961571	0.979386	0
G1	_	SPAC19B12.04	SPAC19B12.04_G1	rps3001	592	9.58717	0.0743093	0.365408	0.545518	0.995634	0	0.179032	2.10968	0.14637	0.303039	0	0.323905	6.93374	0.00845844	0.041602	1
G1	_	SPAC19B12.05c	SPAC19B12.05c_G1	fcp1	2775	7.80136	-0.00493694	0.00241846	0.960778	0.995634	0	0.166103	2.73074	0.0984337	0.230779	0	0.0456431	0.206764	0.649316	0.799592	0
G1	_	SPAC19B12.06c	SPAC19B12.06c_G1	rbd4	1207	7.89426	-0.0153435	0.0272423	0.868903	0.995634	0	-0.151818	2.61494	0.105861	0.24334	0	-0.167667	3.22239	0.0726374	0.200625	0
G1	_	SPAC19B12.07c	SPAC19B12.07c_G1		1533	6.16093	-0.0127834	0.0141851	0.905195	0.995634	0	0.128558	1.4189	0.233585	0.414579	0	0.144314	1.83678	0.175328	0.360611	0
G1	_	SPAC19B12.08	SPAC19B12.08_G1	atg4	1894	4.32342	0.165424	0.670874	0.412747	0.993772	0	0.0214444	0.0108748	0.916945	0.956952	0	-0.0590759	0.0833231	0.772844	0.876477	0
G1	_	SPAC19B12.09	SPAC19B12.09_G1	srp14	761	6.69069	0.10283	0.867672	0.351601	0.983844	0	-0.228881	4.11266	0.0425633	0.122862	0	-0.274534	5.98154	0.0144564	0.0622637	0
G1	_	SPAC19B12.10	SPAC19B12.10_G1	sst2	2442	5.42565	0.0851418	0.441456	0.50642	0.995634	0	0.251769	3.83544	0.0501797	0.13921	0	0.0422444	0.108	0.742433	0.861132	0
G1	_	SPAPB1E7.03	SPAPB1E7.03_G1	rpc82	2013	6.7119	0.13949	1.86509	0.172039	0.919597	0	0.295246	8.29694	0.00397119	0.019233	1	0.127517	1.54848	0.21336	0.410799	0
G1	_	SPAPB1E7.04c	SPAPB1E7.04c_G1	cts2	4125	5.39787	-0.292212	4.38332	0.0362923	0.612319	0	-0.419867	8.63053	0.00330576	0.0165605	-1	-0.391124	7.73567	0.00541405	0.0292113	-1
G1	_	SPAC19B12.11c	SPAC19B12.11c_G1	bud20	807	7.30464	0.121328	1.11775	0.290404	0.970647	0	1.05285	86.2414	1.59259e-20	1.91938e-18	1	1.06242	88.3041	5.61275e-21	8.79377e-19	1
G1	_	SPAC19B12.12c	SPAC19B12.12c_G1	yip11	1995	3.62848	0.164106	0.702017	0.402107	0.991347	0	0.525675	7.45788	0.00631594	0.0279816	1	0.302029	2.45185	0.117387	0.274603	0
G1	_	SPAC19B12.13	SPAC19B12.13_G1	cox1102	2403	2.19861	0.0802411	0.0660726	0.797143	0.995634	0	-0.0595728	0.0330606	0.85572	0.918759	0	0.0325235	0.0107187	0.917541	0.957415	0
G1	_	SPAC19D5.01	SPAC19D5.01_G1	pyp2	2837	6.33351	-0.183948	0.365534	0.545449	0.995634	0	0.00631364	0.000417777	0.983693	0.992402	0	0.322063	1.08252	0.298134	0.505932	0
G1	_	SPAPB1E7.09	SPAPB1E7.09_G1	ogm2	2577	7.23946	-0.198782	3.42517	0.0642097	0.745189	0	-0.338364	9.7133	0.0018294	0.0102	-1	-0.20352	3.57896	0.0585157	0.17301	0
G1	_	SPAPB24D3.08c	SPAPB24D3.08c_G1		1598	6.04454	-0.122796	1.09168	0.2961	0.970858	0	-0.359363	8.87546	0.00289029	0.0149205	-1	-0.193884	2.698	0.100474	0.248882	0
G1	_	SPAC19D5.02c	SPAC19D5.02c_G1	emc10	1134	6.90139	0.0170533	0.0250482	0.874247	0.995634	0	0.153613	2.01599	0.15565	0.315376	0	0.172465	2.57675	0.108444	0.262503	0
G1	_	SPAC19D5.03	SPAC19D5.03_G1	cid1	1623	5.46669	0.0498702	0.141498	0.706797	0.995634	0	0.331768	6.31075	0.0120008	0.046598	1	0.164834	1.55861	0.211869	0.408636	0
G1	_	SPAC19D5.04	SPAC19D5.04_G1	ptr1	10097	9.90437	-0.125069	1.34993	0.245291	0.947728	0	-0.0418548	0.150956	0.697624	0.823076	0	0.019123	0.0315766	0.85896	0.925409	0
G1	_	SPAC19D5.05c	SPAC19D5.05c_G1	imp3	740	4.7915	-0.0500047	0.0726541	0.787511	0.995634	0	0.794332	19.8594	8.33508e-06	0.000101824	1	0.819194	21.5969	3.36392e-06	5.2312e-05	1
G1	_	SPAC19D5.06c	SPAC19D5.06c_G1	din1	1164	5.51781	-0.0367863	0.0912839	0.762551	0.995634	0	0.203084	2.7865	0.0950618	0.224654	0	0.223817	3.49518	0.0615479	0.179539	0
G1	_	SPAC19D5.07	SPAC19D5.07_G1	uga1	2349	3.95517	0.202849	1.38829	0.238695	0.947728	0	-0.0715804	0.155496	0.693338	0.819684	0	0.0525571	0.0903799	0.763695	0.871266	0
G1	_	SPAC19D5.11c	SPAC19D5.11c_G1	ctf8	516	2.14554	-0.245815	0.546308	0.45983	0.995634	0	0.308656	0.930749	0.334668	0.526844	0	0.154688	0.237632	0.625921	0.78453	0
G1	_	SPAC19E9.01c	SPAC19E9.01c_G1	nup40	2019	6.7111	0.023115	0.0565597	0.812019	0.995634	0	-0.257617	6.67853	0.00975811	0.0398398	-1	-0.167011	2.8948	0.0888659	0.228953	0
G1	_	SPAC19E9.02	SPAC19E9.02_G1	fin1	2667	6.21815	0.0899729	0.403661	0.525204	0.995634	0	0.462777	10.7766	0.0010279	0.00652007	1	0.419449	8.94123	0.00278805	0.0172516	1
G1	_	SPAC19E9.03	SPAC19E9.03_G1	pas1	3109	7.44073	-0.291176	3.33084	0.0679923	0.762553	0	-1.15727	50.3877	1.26185e-12	5.4538e-11	-1	-0.989778	37.3284	9.98199e-10	3.2765e-08	-1
G1	_	SPAPYUG7.03c	SPAPYUG7.03c_G1	mid2	2596	7.13304	-0.244993	3.74184	0.0530661	0.691906	0	-0.317917	6.18059	0.0129159	0.0491821	-1	-0.275541	4.71086	0.0299727	0.108192	0
G1	_	SPBC106.05c	SPBC106.05c_G1	tim11	634	6.68587	0.218387	4.49324	0.0340292	0.611278	0	0.297939	8.24541	0.00408552	0.0197105	1	0.18573	3.2293	0.0723316	0.200165	0
G1	_	SPAC19G12.01c	SPAC19G12.01c_G1	cut20	2579	5.47948	-0.122032	0.741691	0.38912	0.991043	0	0.290491	4.28613	0.0384245	0.113749	0	0.247073	3.15692	0.0756059	0.206099	0
G1	_	SPBC115.03	SPBC115.03_G1		2001	6.57834	-0.0430707	0.201125	0.653814	0.995634	0	-0.284382	8.3193	0.00392261	0.0190124	-1	-0.205741	4.49482	0.0339976	0.118171	0
G1	_	SPAC19G12.02c	SPAC19G12.02c_G1	pms1	4301	6.78898	0.0481824	0.242781	0.622205	0.995634	0	-0.0531117	0.285875	0.592876	0.749708	0	-0.0103068	0.011019	0.916398	0.957019	0
G1	_	SPAC19G12.03	SPAC19G12.03_G1	cda1	2099	7.27895	0.0930285	0.826236	0.363363	0.987223	0	-0.294083	7.94635	0.00481843	0.0225857	-1	-0.271177	6.86315	0.00879912	0.0428671	-1
G1	_	SPAC19G12.04	SPAC19G12.04_G1	dal1	1665	4.16795	-0.0198415	0.0124568	0.911133	0.995634	0	0.1158	0.41704	0.518418	0.691832	0	0.165091	0.887998	0.346021	0.554181	0
G1	_	SPAC19G12.05	SPAC19G12.05_G1	mce1	1270	6.78688	0.0283841	0.0319493	0.858139	0.995634	0	0.150762	0.895318	0.34404	0.534747	0	0.210446	1.75967	0.184665	0.373683	0
G1	_	SPAC19G12.06c	SPAC19G12.06c_G1	hta2	952	6.35009	0.0823544	0.621013	0.430671	0.995634	0	-0.511793	21.9596	2.78456e-06	3.76095e-05	-1	-0.388688	13.174	0.000283855	0.00263543	-1
G1	_	SPAC19G12.07c	SPAC19G12.07c_G1	rsd1	2673	5.98138	0.00106323	8.49545e-05	0.992646	0.999311	0	-0.207997	3.0956	0.0785043	0.195445	0	-0.0517228	0.199653	0.655001	0.803644	0
G1	_	SPAC19G12.08	SPAC19G12.08_G1	scs7	1734	7.40522	-0.116929	0.814174	0.366889	0.989369	0	0.164756	1.61927	0.203193	0.377643	0	0.0118012	0.00829821	0.927418	0.961374	0
G1	_	SPAC19G12.09	SPAC19G12.09_G1		1213	6.89057	-0.0465631	0.188897	0.663837	0.995634	0	-0.350044	10.2522	0.00136518	0.00814042	-1	-0.242819	5.05804	0.024512	0.0935546	0
G1	_	SPBC11B10.10c	SPBC11B10.10c_G1	pht1	1266	5.59656	0.299323	5.41755	0.0199353	0.512588	0	0.325427	6.24842	0.0124304	0.047763	1	0.208861	2.59941	0.106903	0.259753	0
G1	_	SPAC19G12.11	SPAC19G12.11_G1	coq9	1494	7.25495	0.00831604	0.00662738	0.935117	0.995634	0	-0.224894	4.69467	0.0302562	0.0955624	0	0.0874133	0.733732	0.391676	0.597235	0
G1	_	SPAC19G12.12	SPAC19G12.12_G1	dlp1	1432	6.40038	0.0928552	0.614407	0.433133	0.995634	0	0.058308	0.23694	0.626425	0.774183	0	0.0921943	0.60293	0.437462	0.636183	0
G1	_	SPAC19G12.13c	SPAC19G12.13c_G1	poz1	2235	6.2967	0.046984	0.222605	0.637062	0.995634	0	0.132451	1.73789	0.187406	0.357744	0	0.112317	1.27612	0.258622	0.465918	0
G1	_	SPAC19G12.14	SPAC19G12.14_G1	its3	2751	6.35152	-0.0247084	0.039747	0.841976	0.995634	0	-0.136047	1.17799	0.277765	0.46272	0	-0.0895218	0.52023	0.470743	0.663857	0
G1	_	SPAC19G12.15c	SPAC19G12.15c_G1	tpp1	2917	8.82227	-0.102863	0.906978	0.340917	0.983844	0	-0.614797	31.772	1.73378e-08	3.73387e-07	-1	-0.601244	30.5439	3.26398e-08	8.31518e-07	-1
G1	_	SPBC1215.02c	SPBC1215.02c_G1	naa25	2596	8.04699	-0.0534314	0.372339	0.541732	0.995634	0	-0.221515	6.27507	0.0122448	0.0471946	-1	-0.217328	6.09344	0.0135684	0.0592567	0
G1	_	SPAC19G12.16c	SPAC19G12.16c_G1	adg2	2741	6.47862	-0.3922	4.96462	0.0258711	0.566902	0	0.00744203	0.00180307	0.96613	0.983762	0	0.0840916	0.230592	0.631085	0.787593	0
G1	_	SPAC19G12.17	SPAC19G12.17_G1	erh1	315	5.53514	0.207523	2.80978	0.0936915	0.819925	0	0.0877666	0.47863	0.489044	0.66772	0	0.187706	2.2794	0.131102	0.295759	0
G1	_	SPAC1A6.01c	SPAC1A6.01c_G1		3761	5.75366	-0.0131742	0.0151494	0.902041	0.995634	0	0.101168	0.878292	0.34867	0.538869	0	0.0629235	0.348976	0.554693	0.728471	0
G1	_	SPAC1A6.02	SPAC1A6.02_G1	wdr55	1568	6.54923	-0.00839043	0.007559	0.930717	0.995634	0	-0.161511	2.68648	0.101203	0.235339	0	-0.237547	5.87246	0.0153796	0.065221	0
G1	_	SPAC1A6.03c	SPAC1A6.03c_G1	plb3	2421	8.08239	0.0653171	0.258203	0.611357	0.995634	0	-0.0662431	0.26421	0.607242	0.760752	0	-0.0725211	0.317834	0.572912	0.742442	0
G1	_	SPBC1271.10c	SPBC1271.10c_G1		2787	7.57791	0.03663	0.115821	0.733612	0.995634	0	0.282857	6.90492	0.0085959	0.0358182	1	0.139556	1.68332	0.194483	0.387914	0
G1	_	SPAC1A6.05c	SPAC1A6.05c_G1	ptl3	1990	6.13461	0.0995137	0.989308	0.319911	0.976973	0	0.0497326	0.237998	0.625656	0.773828	0	-0.0411195	0.165364	0.684265	0.822773	0
G1	_	SPAC1A6.06c	SPAC1A6.06c_G1	meu31	1650	3.93821	0.37596	3.20576	0.0733794	0.778516	0	0.318773	2.2113	0.137003	0.289676	0	0.533018	6.59511	0.0102259	0.0479456	1
G1	_	SPAC1A6.07	SPAC1A6.07_G1	sle1	2359	4.31187	-0.101948	0.37064	0.542656	0.995634	0	-0.244097	1.99364	0.157961	0.318575	0	-0.125639	0.559251	0.454562	0.64936	0
G1	_	SPAC1A6.08c	SPAC1A6.08c_G1	mug125	1264	5.637	0.0312301	0.0463186	0.829598	0.995634	0	0.712968	25.1851	5.20819e-07	8.30527e-06	1	0.719734	26.1329	3.18708e-07	6.28095e-06	1
G1	_	SPAC1A6.09c	SPAC1A6.09c_G1	lag1	1969	7.64577	0.0564737	0.41784	0.518017	0.995634	0	-0.246192	7.67359	0.00560348	0.0254517	-1	-0.160561	3.32314	0.0683113	0.192508	0
G1	_	SPAC1A6.10	SPAC1A6.10_G1	tcd1	1626	7.14663	-0.0385961	0.145015	0.703346	0.995634	0	0.0395791	0.150915	0.697662	0.823076	0	0.0119242	0.013828	0.90639	0.951961	0
G1	_	SPAC1A6.11	SPAC1A6.11_G1		905	1.66062	-0.429969	1.15631	0.282231	0.966527	0	-0.351016	0.746848	0.387476	0.57762	0	0.0128676	0.00109688	0.97358	0.98467	0
G1	_	SPAC1B1.01	SPAC1B1.01_G1	deb1	1891	4.92173	-0.391956	7.24682	0.00710268	0.353274	0	-0.0769074	0.283494	0.59442	0.750689	0	0.124725	0.793811	0.37295	0.580258	0
G1	_	SPAC1B1.02c	SPAC1B1.02c_G1		2169	5.80791	-0.160577	1.69365	0.193121	0.920373	0	-0.129281	1.07343	0.300173	0.487859	0	-0.0505161	0.169595	0.680472	0.821047	0
G1	_	SPAC1B1.03c	SPAC1B1.03c_G1	kap95	2905	7.33619	0.13771	1.01687	0.313263	0.973112	0	-0.373738	7.29615	0.00691024	0.0301367	-1	-0.400505	8.40817	0.00373538	0.0218577	-1
G1	_	SPAC1B1.04c	SPAC1B1.04c_G1	pan3	2959	4.79853	-0.233259	1.97767	0.159636	0.919597	0	0.0866951	0.277078	0.598623	0.754387	0	0.12814	0.622934	0.429959	0.630895	0
G1	_	SPAC1B2.02c	SPAC1B2.02c_G1	ugo1	1705	6.68007	0.0580575	0.367147	0.544564	0.995634	0	0.205623	4.5654	0.0326241	0.101006	0	0.17775	3.47002	0.0624905	0.181058	0
G1	_	SPAC1B2.03c	SPAC1B2.03c_G1	elo2	2210	8.65986	-0.0785938	0.635517	0.425339	0.995634	0	-0.0956529	0.935549	0.333425	0.525727	0	-0.115608	1.37171	0.241519	0.447067	0
G1	_	SPBC12D12.01	SPBC12D12.01_G1	sad1	2981	5.85438	0.0132453	0.0152577	0.901694	0.995634	0	0.265542	6.15777	0.0130836	0.0496638	1	0.158445	2.22476	0.135814	0.302899	0
G1	_	SPAC1B2.05	SPAC1B2.05_G1	mcm5	4968	6.54001	-0.220553	4.56937	0.0325485	0.608899	0	0.127458	1.54499	0.213877	0.390322	0	0.114022	1.25874	0.26189	0.469468	0
G1	_	SPAC1B2.06	SPAC1B2.06_G1		869	4.05094	0.033623	0.0263981	0.870932	0.995634	0	0.329599	2.5544	0.109988	0.250016	0	0.701295	12.536	0.000399191	0.00349404	1
G1	_	SPAC1B3.01c	SPAC1B3.01c_G1		1886	7.69861	0.023216	0.0570873	0.81116	0.995634	0	0.0160735	0.0270217	0.86943	0.927915	0	-0.00781235	0.00644322	0.936023	0.965421	0
G1	_	SPAC1B3.02c	SPAC1B3.02c_G1		1252	5.88414	-0.127559	0.863583	0.352738	0.983969	0	0.062113	0.203162	0.65218	0.792554	0	0.232466	2.93643	0.0866021	0.226517	0
G1	_	SPAC1B3.03c	SPAC1B3.03c_G1	wis2	1377	11.7397	0.0722332	0.534776	0.464606	0.995634	0	-0.125206	1.60284	0.205501	0.380352	0	-0.257935	6.80344	0.00909824	0.0437296	-1
G1	_	SPAC1B3.04c	SPAC1B3.04c_G1	guf1	2292	4.10112	0.271672	1.78285	0.1818	0.919597	0	1.18793	38.4693	5.56218e-10	1.57729e-08	1	0.876936	20.5899	5.68952e-06	8.27291e-05	1
G1	_	SPAC1B3.05	SPAC1B3.05_G1	not3	2302	6.74127	0.140293	1.35959	0.243609	0.947728	0	0.26667	4.88563	0.0270812	0.0875738	0	0.156621	1.69444	0.193017	0.385834	0
G1	_	SPBC12D12.03	SPBC12D12.03_G1	cct1	1936	7.40228	-0.151299	2.32683	0.127161	0.889217	0	-0.321545	10.2527	0.00136483	0.00814042	-1	-0.246906	6.14495	0.0131788	0.0578775	0
G1	_	SPAC1B3.07c	SPAC1B3.07c_G1	vps28	1261	5.77985	-0.00265696	0.000489112	0.982356	0.9991	0	0.0539816	0.197457	0.656781	0.794757	0	0.146166	1.50568	0.2198	0.420205	0
G1	_	SPAC1B3.08	SPAC1B3.08_G1		2031	6.89694	0.0342449	0.118423	0.730752	0.995634	0	-0.381761	13.935	0.000189238	0.00155434	-1	-0.317714	9.88359	0.0016676	0.0114217	-1
G1	_	SPAC1B3.09c	SPAC1B3.09c_G1	noc202	1683	7.46001	0.0144299	0.0241807	0.876426	0.995634	0	0.0934395	1.00432	0.316267	0.506787	0	0.065719	0.501629	0.478785	0.670663	0
G1	_	SPAC1B3.10c	SPAC1B3.10c_G1	hrd302	1995	6.47458	0.0769732	0.743996	0.388384	0.991043	0	-0.184895	4.01862	0.0450005	0.128132	0	-0.110316	1.48894	0.22238	0.423733	0
G1	_	SPBC1306.02	SPBC1306.02_G1	trm734	3557	7.06106	0.0605685	0.412034	0.520939	0.995634	0	0.248302	6.90559	0.00859265	0.0358182	1	0.0978034	1.07499	0.299822	0.508107	0
G1	_	SPAC1B3.12c	SPAC1B3.12c_G1	rpb10	761	7.45094	0.0742003	0.611174	0.434346	0.995634	0	0.114899	1.44676	0.229048	0.408959	0	0.185696	3.83923	0.0500665	0.154643	0
G1	_	SPBC13E7.08c	SPBC13E7.08c_G1	leo1	2578	6.40426	0.040016	0.174345	0.676278	0.995634	0	0.304889	10.1913	0.00141106	0.00834256	1	0.199929	4.42771	0.03536	0.121374	0
G1	_	SPAC1B3.13	SPAC1B3.13_G1	nan1	2692	7.68903	-0.00638022	0.00447042	0.946692	0.995634	0	0.394152	17.1773	3.40483e-05	0.00034609	1	0.3467	13.3807	0.000254226	0.00238865	1
G1	_	SPAC1B3.14	SPAC1B3.14_G1	vma3	810	8.05025	-0.0468504	0.217571	0.640897	0.995634	0	0.0936001	0.866132	0.352028	0.54271	0	0.0811849	0.655206	0.418258	0.620995	0
G1	_	SPAC1B3.15c	SPAC1B3.15c_G1		3121	5.19936	-0.0912659	0.352039	0.552961	0.995634	0	0.399569	6.96896	0.00829357	0.03493	1	0.512016	11.8352	0.000581228	0.00483384	1
G1	_	SPBC146.13c	SPBC146.13c_G1	myo1	4186	8.73232	-0.145335	1.76822	0.183603	0.919597	0	-0.318774	8.427	0.00369689	0.0181944	-1	-0.197381	3.2528	0.0713017	0.198251	0
G1	_	SPAC1B3.16c	SPAC1B3.16c_G1	vht1	2336	6.82478	-0.09252	0.781603	0.376651	0.991043	0	-1.43766	163.659	1.79583e-37	7.3444e-35	-1	-1.63634	210.586	1.02326e-47	6.41278e-45	-1
G1	_	SPAC1B3.17	SPAC1B3.17_G1	clr2	2455	5.61359	-0.0821689	0.423811	0.515041	0.995634	0	-0.0169985	0.0177669	0.893962	0.943175	0	-0.0453449	0.129008	0.719463	0.847692	0
G1	_	SPAC1B3.18c	SPAC1B3.18c_G1	mrps18	1409	6.20574	-0.00538308	0.00183334	0.965847	0.995717	0	-0.120608	0.890494	0.345343	0.535975	0	-0.162572	1.64556	0.199564	0.394159	0
G1	_	SPAC1B3.20	SPAC1B3.20_G1		513	5.57201	0.114731	0.894461	0.344271	0.983844	0	-0.0278009	0.0499827	0.823093	0.901648	0	-0.154912	1.56733	0.210595	0.407094	0
G1	_	SPBC146.14c	SPBC146.14c_G1	sec26	3282	8.43538	-0.104365	1.12587	0.288657	0.969074	0	-0.249123	6.33709	0.0118239	0.0461109	-1	-0.186553	3.58148	0.058427	0.172963	0
G1	_	SPAC1B9.02c	SPAC1B9.02c_G1	sck1	2585	6.73188	-0.0691373	0.375685	0.539922	0.995634	0	-0.0885637	0.605084	0.436645	0.621215	0	-0.164427	2.10556	0.146765	0.320164	0
G1	_	SPAC1B9.03c	SPAC1B9.03c_G1		1306	7.0102	0.0455758	0.168463	0.681482	0.995634	0	0.722591	43.3976	4.46745e-11	1.52992e-09	1	0.519176	22.3084	2.32189e-06	3.78939e-05	1
G1	_	SPAC1D4.01	SPAC1D4.01_G1	tls1	1876	5.04577	-0.230716	2.63249	0.104697	0.850885	0	0.146484	1.08619	0.297316	0.485103	0	0.0520782	0.140094	0.708187	0.839616	0
G1	_	SPAC1D4.02c	SPAC1D4.02c_G1	grh1	1945	5.5117	0.161027	2.08121	0.149122	0.910867	0	0.00716267	0.00387068	0.950392	0.973856	0	-0.168704	2.16379	0.141295	0.311576	0
G1	_	SPAC1D4.03c	SPAC1D4.03c_G1	aut12	1845	5.46346	0.0290664	0.0589244	0.808204	0.995634	0	-0.30263	5.87012	0.0154	0.0564397	0	-0.207162	2.88976	0.0891441	0.229337	0
G1	_	SPAC1D4.04	SPAC1D4.04_G1	cct2	1798	8.04611	-0.151295	1.69764	0.192596	0.920373	0	-0.176086	2.28675	0.130483	0.279855	0	-0.163506	1.98428	0.15894	0.337539	0
G1	_	SPAC1D4.05c	SPAC1D4.05c_G1	erd101	3423	6.37301	-0.0536989	0.195736	0.658185	0.995634	0	0.0328556	0.0724596	0.787789	0.879892	0	0.00157693	0.000171131	0.989563	0.994628	0
G1	_	SPAC1D4.06c	SPAC1D4.06c_G1	csk1	921	5.54825	-0.0275267	0.0555635	0.813651	0.995634	0	0.277602	5.7255	0.0167202	0.0602724	0	0.124919	1.16787	0.27984	0.489329	0
G1	_	SPAC1D4.08	SPAC1D4.08_G1	pis1	1113	6.47333	0.0479395	0.241533	0.623101	0.995634	0	0.11444	1.35128	0.245054	0.427668	0	-0.0290742	0.0877634	0.76704	0.872421	0
G1	_	SPAC1D4.09c	SPAC1D4.09c_G1	rtf2	944	6.01878	0.0283766	0.0763584	0.782294	0.995634	0	0.309703	9.176	0.00245209	0.0130897	1	0.213496	4.42531	0.0354096	0.121438	0
G1	_	SPAC1D4.10	SPAC1D4.10_G1	trz1	3172	7.10769	0.107192	1.13272	0.287196	0.969025	0	-0.211317	4.24108	0.039457	0.116147	0	-0.202526	3.9547	0.0467406	0.147494	0
G1	_	SPAC1D4.11c	SPAC1D4.11c_G1	lkh1	4306	7.03119	-0.436108	8.90296	0.00284708	0.243496	0	0.141096	0.950859	0.329501	0.52146	0	0.127627	0.780323	0.377042	0.583726	0
G1	_	SPAC1D4.12	SPAC1D4.12_G1	rad15	3338	6.86247	-0.0307867	0.0832131	0.772989	0.995634	0	-0.0657513	0.372187	0.541814	0.710859	0	-0.0168647	0.0249823	0.874411	0.933708	0
G1	_	SPBC15C4.03	SPBC15C4.03_G1	mrs6	1555	7.04976	0.111315	1.42234	0.233018	0.947728	0	0.292194	9.75333	0.00178999	0.0100338	1	0.27278	8.6291	0.00330836	0.0198596	1
G1	_	SPAC1D4.13	SPAC1D4.13_G1	byr1	1928	7.97168	0.0783114	0.676594	0.410762	0.993196	0	-0.241333	6.27694	0.0122319	0.0471946	-1	-0.425375	19.4826	1.01522e-05	0.000137265	-1
G1	_	SPAC1D4.14	SPAC1D4.14_G1	tho2	5187	8.12755	-0.0167305	0.0255229	0.873071	0.995634	0	0.0334445	0.101536	0.749994	0.858957	0	0.030474	0.0848238	0.770864	0.875323	0
G1	_	SPAC1F12.02c	SPAC1F12.02c_G1	tma19	755	11.5124	0.100007	0.715018	0.397783	0.991347	0	0.376221	10.072	0.00150542	0.00876806	1	0.528152	19.8112	8.54788e-06	0.000119044	1
G1	_	SPAC1F12.04c	SPAC1F12.04c_G1		830	6.3954	0.177635	2.8452	0.0916469	0.817	0	0.0370357	0.118939	0.730188	0.84492	0	0.162547	2.36882	0.123781	0.285406	0
G1	_	SPBC16A3.16	SPBC16A3.16_G1	coa5	1125	6.28581	-0.138544	1.44835	0.228792	0.947294	0	-0.304846	6.75391	0.00935422	0.0384665	-1	-0.288587	6.18494	0.0128842	0.0569832	0
G1	_	SPAC1F12.05	SPAC1F12.05_G1	any2	3231	5.78342	0.0323626	0.0773687	0.780895	0.995634	0	0.0470259	0.158503	0.690539	0.818462	0	0.139692	1.45296	0.228053	0.431655	0
G1	_	SPAC1F12.06c	SPAC1F12.06c_G1		2659	5.31376	0.117463	0.786996	0.37501	0.991043	0	0.0485702	0.129112	0.719355	0.838578	0	-0.164295	1.47347	0.224799	0.426913	0
G1	_	SPBC16C6.09	SPBC16C6.09_G1	ogm4	2695	7.46562	-0.296231	5.24858	0.0219647	0.539815	0	-0.370448	8.13636	0.00433864	0.0207085	-1	-0.20385	2.50153	0.113736	0.26867	0
G1	_	SPAC1F12.07	SPAC1F12.07_G1	ser1	1485	7.5627	0.122583	1.05164	0.305131	0.970858	0	-0.480247	15.6224	7.73336e-05	0.000711674	-1	-0.565136	21.6503	3.27154e-06	5.10018e-05	-1
G1	_	SPAC1F12.08	SPAC1F12.08_G1	cab4	1296	5.09651	-0.162678	0.623391	0.42979	0.995634	0	0.483504	5.67298	0.0172281	0.0615908	0	0.489406	5.8543	0.0155391	0.0656664	0
G1	_	SPAC1F12.09	SPAC1F12.09_G1	gpi17	1771	6.7894	-0.0636262	0.317153	0.573323	0.995634	0	-0.0226114	0.0395443	0.842374	0.912087	0	-0.0698827	0.381789	0.536647	0.714333	0
G1	_	SPAC1F12.10c	SPAC1F12.10c_G1		796	7.14443	0.234253	3.53975	0.0599143	0.720697	0	0.273193	4.76195	0.0290955	0.0927004	0	0.144165	1.33243	0.248374	0.455401	0
G1	_	SPAC1F3.01	SPAC1F3.01_G1	rrp6	2439	7.07081	-0.218661	3.36957	0.0664109	0.758777	0	0.210497	3.16318	0.0753163	0.189694	0	0.155753	1.74342	0.186706	0.376719	0
G1	_	SPAC1F3.02c	SPAC1F3.02c_G1	mkh1	3956	6.79638	0.0434543	0.183041	0.668773	0.995634	0	0.083121	0.658967	0.416925	0.603478	0	0.179932	3.16911	0.0750433	0.204833	0
G1	_	SPAC1F3.03	SPAC1F3.03_G1	sro7	4750	5.96514	-0.244855	4.17126	0.0411153	0.64145	0	0.172744	2.12476	0.144936	0.300965	0	0.219433	3.51898	0.0606696	0.178004	0
G1	_	SPAC1F3.04c	SPAC1F3.04c_G1	tsr3	1078	6.47702	0.122287	0.882237	0.34759	0.983844	0	0.343858	6.94373	0.00841134	0.0352837	1	0.442355	11.6561	0.000639922	0.00522186	1
G1	_	SPAC1F3.05	SPAC1F3.05_G1	gga21	2035	5.62691	-0.17294	2.31826	0.127863	0.889217	0	0.00928848	0.00664177	0.935047	0.965779	0	0.125035	1.26347	0.260995	0.468401	0
G1	_	SPAC1F3.06c	SPAC1F3.06c_G1	spo15	6229	8.95132	-0.11855	1.18797	0.27574	0.963832	0	0.114891	1.11613	0.290753	0.477627	0	0.12344	1.29381	0.255346	0.462234	0
G1	_	SPBC16G5.05c	SPBC16G5.05c_G1	scs2	1621	7.45196	-0.190116	4.49337	0.0340265	0.611278	0	-0.262375	8.38419	0.003785	0.0185028	-1	-0.248101	7.60117	0.00583305	0.0308227	-1
G1	_	SPAC1F3.07c	SPAC1F3.07c_G1	rsc58	1518	3.97867	0.0511827	0.0581256	0.809483	0.995634	0	0.225671	1.11994	0.289932	0.476529	0	0.304236	2.12249	0.14515	0.317951	0
G1	_	SPAC1F3.08c	SPAC1F3.08c_G1		327	0.605207	-0.540383	0.529201	0.466943	0.995634	0	1.21991	4.19659	0.0405053	0.11837	0	1.53739	7.56522	0.00595053	0.0312852	1
G1	_	SPAC1F3.09	SPAC1F3.09_G1	mug161	2971	7.43853	0.0871133	0.649544	0.420276	0.995634	0	-0.220369	4.0393	0.0444523	0.126777	0	-0.172921	2.51933	0.112458	0.26696	0
G1	_	SPAC1F3.10c	SPAC1F3.10c_G1	oct1	4533	5.71787	0.0470689	0.135085	0.713217	0.995634	0	0.233679	3.31195	0.0687779	0.176435	0	0.227015	3.19541	0.0738454	0.202268	0
G1	_	SPAC1F5.02	SPAC1F5.02_G1	pdi1	1793	9.95085	0.0264364	0.0837632	0.772261	0.995634	0	-0.0643182	0.494147	0.482083	0.661532	0	-0.0591092	0.418162	0.517856	0.700799	0
G1	_	SPAC1F5.03c	SPAC1F5.03c_G1		1937	6.81538	-0.185525	3.12995	0.076866	0.783283	0	0.0310988	0.0879285	0.766827	0.868313	0	-0.042417	0.164809	0.684767	0.823218	0
G1	_	SPAC1F5.04c	SPAC1F5.04c_G1	cdc12	5914	7.00771	-0.170699	2.83432	0.0922696	0.817125	0	0.0581951	0.329601	0.565894	0.728525	0	0.0732852	0.531711	0.465888	0.660432	0
G1	_	SPAC1F5.05c	SPAC1F5.05c_G1	mso1	972	5.22688	-0.0143398	0.0119743	0.912864	0.995634	0	0.0840003	0.403253	0.525414	0.696811	0	0.0555265	0.18088	0.670618	0.814489	0
G1	_	SPBC16H5.03c	SPBC16H5.03c_G1	uba2	2157	6.24369	-0.209995	4.03859	0.0444708	0.654222	0	-0.352105	10.8607	0.000982262	0.00628147	-1	-0.271221	6.6797	0.00975171	0.0462984	-1
G1	_	SPAC1F5.07c	SPAC1F5.07c_G1	hem14	1851	6.73076	0.0235591	0.0410097	0.839519	0.995634	0	-0.130979	1.23666	0.266115	0.451218	0	-0.0965864	0.681306	0.409138	0.613175	0
G1	_	SPAC1F5.08c	SPAC1F5.08c_G1	yam8	1573	6.13796	-0.0448603	0.15849	0.69055	0.995634	0	-0.346865	8.92131	0.00281862	0.0146591	-1	-0.165828	2.13456	0.144012	0.316009	0
G1	_	SPAC1F5.09c	SPAC1F5.09c_G1	shk2	1770	3.94696	-0.0537664	0.0572298	0.810929	0.995634	0	0.122345	0.294008	0.587663	0.74643	0	0.138649	0.389025	0.532812	0.712729	0
G1	_	SPAC1F5.10	SPAC1F5.10_G1	fal1	1599	7.21853	0.0662905	0.359349	0.548868	0.995634	0	0.636286	33.5638	6.89646e-09	1.59484e-07	1	0.546831	24.8971	6.04742e-07	1.11468e-05	1
G1	_	SPAC1F5.11c	SPAC1F5.11c_G1	tra2	11390	9.09052	-0.180078	2.33091	0.126828	0.889217	0	0.030654	0.0676164	0.794839	0.883986	0	0.149653	1.61508	0.203779	0.398684	0
G1	_	SPAC1F7.01c	SPAC1F7.01c_G1	spt6	4413	8.14298	-0.128569	1.17793	0.277777	0.963832	0	-0.190014	2.55975	0.109616	0.249516	0	-0.219216	3.42383	0.0642617	0.184484	0
G1	_	SPAC1F7.02c	SPAC1F7.02c_G1	has1	2183	8.00303	0.112438	1.4894	0.22231	0.941973	0	0.633641	47.7259	4.90173e-12	1.88461e-10	1	0.510692	31.0868	2.4674e-08	6.46996e-07	1
G1	_	SPAC1F7.03	SPAC1F7.03_G1	pkd2	3026	7.18563	-0.0127089	0.0187346	0.89113	0.995634	0	-0.243835	6.64131	0.00996405	0.0405222	-1	-0.00826304	0.00790485	0.929154	0.961782	0
G1	_	SPAC1F7.04	SPAC1F7.04_G1	rho1	1716	8.9636	-0.0269153	0.0759095	0.782919	0.995634	0	0.0131611	0.0180673	0.893075	0.942575	0	0.079974	0.670783	0.412779	0.616218	0
G1	_	SPAC1F7.05	SPAC1F7.05_G1	cdc22	2716	7.79448	-0.198286	4.80664	0.0283502	0.580933	0	-0.144352	2.52611	0.111976	0.25252	0	-0.239724	6.98578	0.00821599	0.040607	-1
G1	_	SPAC1F7.06	SPAC1F7.06_G1	hsp3105	1943	3.25288	0.519867	5.46487	0.0194024	0.512588	0	0.418708	3.31213	0.0687702	0.176435	0	0.389861	2.99966	0.0832822	0.220699	0
G1	_	SPAC1F7.07c	SPAC1F7.07c_G1	fip1	1763	5.37215	-0.241719	1.45993	0.226942	0.947294	0	0.147533	0.557442	0.455293	0.637756	0	0.10862	0.294505	0.587348	0.752242	0
G1	_	SPAC1F7.08	SPAC1F7.08_G1	fio1	2795	8.01086	-0.752519	5.60034	0.017957	0.507757	0	-0.759805	5.62434	0.0177128	0.0629636	0	-0.74738	5.51853	0.018816	0.076721	0
G1	_	SPBC16H5.05c	SPBC16H5.05c_G1	cyp7	2394	6.66636	0.0976789	0.970788	0.324484	0.978335	0	0.282075	8.05942	0.00452678	0.0214432	1	0.239112	5.86944	0.015406	0.0652597	0
G1	_	SPAC1F7.09c	SPAC1F7.09c_G1	dal2	1635	4.09491	-0.0484302	0.0744378	0.784982	0.995634	0	0.319982	3.34984	0.0672117	0.173554	0	0.315139	3.38696	0.065714	0.187964	0
G1	_	SPAC1F7.10	SPAC1F7.10_G1		1403	4.12254	0.0501411	0.073017	0.786994	0.995634	0	0.228062	1.49579	0.221321	0.399371	0	0.210862	1.33083	0.248658	0.455667	0
G1	_	SPAC1F7.11c	SPAC1F7.11c_G1		3025	5.97493	0.0679011	0.415515	0.519184	0.995634	0	0.0745804	0.486389	0.485543	0.665405	0	0.119904	1.30324	0.253622	0.46071	0
G1	_	SPAC1F7.12	SPAC1F7.12_G1	yak3	1455	6.7633	0.0871835	0.651021	0.419748	0.995634	0	-0.0290874	0.0706275	0.790425	0.881266	0	-0.0158763	0.0212767	0.884028	0.938183	0
G1	_	SPBC1709.05	SPBC1709.05_G1	sks2	2165	10.9227	-0.157288	2.90842	0.0881184	0.80719	0	-0.331658	12.8735	0.000333274	0.00251339	-1	-0.2958	10.2624	0.00135766	0.00971286	-1
G1	_	SPAC1F7.13c	SPAC1F7.13c_G1	rpl801	874	7.10365	0.0780771	0.264662	0.606935	0.995634	0	-0.0280348	0.0335041	0.854766	0.918662	0	-0.0446283	0.0857819	0.76961	0.874438	0
G1	_	SPAC1F7.14c	SPAC1F7.14c_G1	tam6	246	4.96048	0.239508	1.94896	0.162699	0.919597	0	0.0837566	0.228048	0.632975	0.779631	0	0.187993	1.18749	0.275837	0.485002	0
G1	_	SPAC1F8.01	SPAC1F8.01_G1	ght3	2041	2.9783	-0.601429	5.84428	0.0156278	0.480671	0	-1.09787	16.8789	3.9841e-05	0.000396323	-1	-1.39902	27.3477	1.6997e-07	3.52715e-06	-1
G1	_	SPAC1F8.03c	SPAC1F8.03c_G1	str3	2100	6.96135	-0.746162	4.21534	0.0400601	0.633839	0	0.988908	7.4523	0.00633554	0.0280203	1	0.925971	6.17342	0.0129684	0.057291	0
G1	_	SPAC1F8.04c	SPAC1F8.04c_G1		1545	2.49235	-0.737398	6.07261	0.0137294	0.448136	0	-1.02651	10.6143	0.00112215	0.00699058	-1	-1.57348	23.7407	1.10227e-06	1.92958e-05	-1
G1	_	SPBC1861.03	SPBC1861.03_G1	naa35	4911	7.26034	-0.314931	4.54881	0.0329416	0.608983	0	-0.374595	6.34496	0.0117715	0.0459638	-1	-0.237648	2.5943	0.107249	0.260312	0
G1	_	SPAC1F8.05	SPAC1F8.05_G1	isp3	1006	1.66144	-0.245011	0.499857	0.479563	0.995634	0	-2.57525	30.224	3.84911e-08	7.83193e-07	-1	-1.80941	19.7205	8.96343e-06	0.000124157	-1
G1	_	SPAC1F8.06	SPAC1F8.06_G1	pfl8	1561	5.48189	-0.0675231	0.1034	0.747787	0.995634	0	0.740713	12.7042	0.000364844	0.0027091	1	0.296979	2.00992	0.156274	0.333459	0
G1	_	SPAC1F8.07c	SPAC1F8.07c_G1	pdc101	1878	9.81275	-0.239188	5.58031	0.0181635	0.507757	0	-0.109249	1.16317	0.280809	0.466075	0	0.00897683	0.00788408	0.929247	0.961782	0
G1	_	SPAC1F8.08	SPAC1F8.08_G1		1013	5.62814	0.171465	2.25532	0.133156	0.898088	0	-0.508001	17.3296	3.14256e-05	0.00032499	-1	-0.312169	7.00086	0.00814706	0.0404178	-1
G1	_	SPAC20G4.01	SPAC20G4.01_G1	caf16	1072	6.20218	0.03958	0.122205	0.726656	0.995634	0	0.207643	3.34746	0.0673088	0.1736	0	0.209677	3.47461	0.0623175	0.180807	0
G1	_	SPAC20G4.02c	SPAC20G4.02c_G1	fus1	4680	6.64982	-0.0120468	0.0110879	0.916138	0.995634	0	-0.0270875	0.0549988	0.814583	0.895983	0	-0.20119	3.04224	0.081124	0.216434	0
G1	_	SPAC20G4.03c	SPAC20G4.03c_G1	hri1	2738	7.85213	0.0674456	0.0955465	0.757241	0.995634	0	-0.587962	7.17146	0.00740723	0.0319705	-1	-0.824298	14.0007	0.000182747	0.00179792	-1
G1	_	SPAC20G4.04c	SPAC20G4.04c_G1	hus1	1496	5.63926	-0.0139963	0.0114683	0.914717	0.995634	0	0.215507	2.72536	0.0987661	0.23113	0	0.0958239	0.541599	0.461771	0.65643	0
G1	_	SPAC20G4.05c	SPAC20G4.05c_G1	fmp40	1999	5.53169	0.196115	1.98925	0.158419	0.919597	0	-0.0338458	0.056539	0.812052	0.894624	0	-0.0561924	0.159047	0.690035	0.826539	0
G1	_	SPAC20G4.06c	SPAC20G4.06c_G1	adf1	629	9.30397	0.00848705	0.0065749	0.935374	0.995634	0	-0.284656	7.31571	0.00683543	0.0298728	-1	-0.122613	1.368	0.242157	0.447933	0
G1	_	SPAC20G4.07c	SPAC20G4.07c_G1	erg4	1541	7.12208	0.0748277	0.484861	0.486229	0.995634	0	0.0768564	0.504934	0.47734	0.656749	0	-0.000460369	1.82072e-05	0.996595	0.99755	0
G1	_	SPAC20G4.08	SPAC20G4.08_G1	pdc1	3500	7.43922	-0.0624999	0.373591	0.541053	0.995634	0	0.214172	4.40114	0.0359148	0.108212	0	0.147767	2.11019	0.146321	0.319621	0
G1	_	SPAC20G4.09	SPAC20G4.09_G1		75	1.9362	0.0944704	0.0735437	0.786245	0.995634	0	-0.154304	0.174585	0.676069	0.807029	0	0.453744	1.83249	0.175834	0.361177	0
G1	_	SPAC20G8.01	SPAC20G8.01_G1	cdc17	2623	6.9786	0.148579	2.06408	0.150806	0.912912	0	0.0102659	0.00961078	0.921905	0.960177	0	-0.0645181	0.382938	0.536035	0.714098	0
G1	_	SPAC20G8.02	SPAC20G8.02_G1		2445	6.04879	0.107011	0.720166	0.396089	0.991043	0	-0.166889	1.67914	0.195038	0.366956	0	-0.221396	2.99326	0.0836119	0.220983	0
G1	_	SPAC20G8.03	SPAC20G8.03_G1	itr2	2213	8.83179	-0.104649	0.35045	0.553859	0.995634	0	-0.563174	10.0156	0.00155219	0.00894466	-1	-0.7476	17.4809	2.90209e-05	0.000357316	-1
G1	_	SPAC20G8.04c	SPAC20G8.04c_G1		2503	7.24751	0.0133529	0.0199858	0.887577	0.995634	0	-0.901539	83.076	7.89569e-20	8.53143e-18	-1	-0.671567	48.0188	4.22152e-12	2.01956e-10	-1
G1	_	SPAC20G8.05c	SPAC20G8.05c_G1	cdc15	3461	6.20519	-0.157971	1.37321	0.24126	0.947728	0	0.259976	3.768	0.0522419	0.143408	0	0.153536	1.3215	0.250322	0.457101	0
G1	_	SPAC20G8.06	SPAC20G8.06_G1	not1	6610	8.31669	-0.167068	2.08435	0.148815	0.910723	0	0.0358574	0.0960015	0.756682	0.862989	0	0.0531071	0.211093	0.645912	0.798048	0
G1	_	SPAC20G8.07c	SPAC20G8.07c_G1	erg2	1151	6.96991	-0.0649492	0.396352	0.528979	0.995634	0	0.0684286	0.437154	0.508499	0.684296	0	0.0928676	0.818932	0.365493	0.574071	0
G1	_	SPAC20G8.08c	SPAC20G8.08c_G1	fft1	3376	7.39203	0.0483514	0.249015	0.61777	0.995634	0	0.37085	14.711	0.000125313	0.00108472	1	0.208231	4.64865	0.0310779	0.110706	0
G1	_	SPAC20G8.09c	SPAC20G8.09c_G1	nat10	3267	8.41529	-0.0730393	0.55667	0.455605	0.995634	0	0.407505	17.4284	2.98328e-05	0.000310771	1	0.233186	5.71217	0.0168477	0.0699698	0
G1	_	SPAC20G8.10c	SPAC20G8.10c_G1	atg6	1598	4.50275	-0.208172	1.47155	0.225102	0.947294	0	0.0136479	0.00633161	0.936578	0.966338	0	-0.265278	2.358	0.124642	0.286952	0
G1	_	SPAC20H4.01	SPAC20H4.01_G1	utp5	2474	7.31649	0.0347844	0.108171	0.742237	0.995634	0	0.54811	27.2211	1.81467e-07	3.18559e-06	1	0.366209	12.1121	0.000500967	0.00424839	1
G1	_	SPAC20H4.02	SPAC20H4.02_G1	dsc3	1120	7.33516	0.0311162	0.0972786	0.75512	0.995634	0	-0.0274677	0.0744695	0.784937	0.878356	0	0.0514418	0.265047	0.606674	0.768677	0
G1	_	SPAC20H4.03c	SPAC20H4.03c_G1	tfs1	1179	6.47383	-0.0336644	0.118539	0.730624	0.995634	0	0.00886915	0.00806175	0.928456	0.962713	0	0.0605716	0.387029	0.533865	0.713126	0
G1	_	SPAC20H4.04	SPAC20H4.04_G1	fml2	3745	6.35195	0.0585182	0.308018	0.578899	0.995634	0	-0.119278	1.22704	0.267984	0.453295	0	-0.100408	0.890874	0.345241	0.553174	0
G1	_	SPAC20H4.05c	SPAC20H4.05c_G1	mde1	3276	6.36346	0.0355544	0.115445	0.734029	0.995634	0	0.13149	1.55486	0.21242	0.38842	0	0.324096	9.84378	0.00170407	0.011608	1
G1	_	SPAC20H4.06c	SPAC20H4.06c_G1	gpl1	2036	5.34329	0.199828	2.44164	0.118152	0.876881	0	-0.0157323	0.0142335	0.905034	0.950047	0	-0.106257	0.661539	0.416017	0.618842	0
G1	_	SPAC20H4.07	SPAC20H4.07_G1	rad57	1922	6.21985	0.10568	1.17821	0.277721	0.963832	0	0.117445	1.41312	0.234539	0.415563	0	0.0915733	0.880417	0.348087	0.556565	0
G1	_	SPAC20H4.08	SPAC20H4.08_G1	whi2	1295	5.92643	-0.115698	0.945071	0.330977	0.979521	0	-0.106432	0.78137	0.376722	0.566303	0	-0.1627	1.86031	0.172589	0.356616	0
G1	_	SPAC20H4.09	SPAC20H4.09_G1		1944	6.53384	0.0202124	0.0377445	0.845957	0.995634	0	0.254529	5.98823	0.0144016	0.0535928	0	0.255763	6.14766	0.0131586	0.0578775	0
G1	_	SPAC20H4.10	SPAC20H4.10_G1	ufd2	3153	7.81076	0.0525217	0.2717	0.602194	0.995634	0	0.17939	3.15745	0.075581	0.190075	0	0.149096	2.19587	0.138381	0.307422	0
G1	_	SPAC20H4.11c	SPAC20H4.11c_G1	rho5	1264	3.92051	0.0866121	0.213891	0.643735	0.995634	0	0.190793	1.01176	0.31448	0.50457	0	0.456956	6.37156	0.0115964	0.0528542	0
G1	_	SPAC212.04c	SPAC212.04c_G1		1615	3.23999	-0.541471	4.65934	0.030885	0.600122	0	-1.16074	18.5654	1.6417e-05	0.00018605	-1	-1.3179	24.2901	8.28618e-07	1.48795e-05	-1
G1	_	SPAC212.06c	SPAC212.06c_G1		891	1.12482	0.0603232	0.02268	0.880292	0.995634	0	-0.923012	3.81345	0.0508427	0.140366	0	-0.599576	1.88421	0.169856	0.352596	0
G1	_	SPAC21E11.03c	SPAC21E11.03c_G1	pcr1	1481	5.45241	-0.130236	0.798442	0.37156	0.991043	0	-0.475208	9.9969	0.00156804	0.00899078	-1	-0.470402	9.98043	0.00158213	0.010956	-1
G1	_	SPAC21E11.04	SPAC21E11.04_G1	aca1	1024	6.48499	0.182697	3.09686	0.0784437	0.789928	0	-1.12862	100.588	1.13263e-23	1.86795e-21	-1	-1.0385	88.741	4.50035e-21	7.23172e-19	-1
G1	_	SPAC21E11.05c	SPAC21E11.05c_G1	cyp8	2472	6.5231	-0.111989	1.44501	0.22933	0.947728	0	0.36807	16.1499	5.85203e-05	0.000559065	1	0.112551	1.49663	0.221191	0.42198	0
G1	_	SPAC21E11.06	SPAC21E11.06_G1	tif224	2097	6.81352	-0.0530522	0.282323	0.595183	0.995634	0	-0.0628206	0.387727	0.533496	0.704759	0	-0.0872569	0.758545	0.383784	0.590686	0
G1	_	SPAC21E11.07	SPAC21E11.07_G1	iba57	1199	5.28014	0.0926562	0.518448	0.471505	0.995634	0	0.0411428	0.0980704	0.754158	0.861521	0	-0.00487537	0.00140854	0.970062	0.983349	0
G1	_	SPAC21E11.08	SPAC21E11.08_G1	lcb2	2432	7.13732	-0.212046	3.87571	0.0489896	0.667225	0	-0.242553	4.99075	0.0254831	0.0836787	0	-0.17365	2.59908	0.106926	0.259753	0
G1	_	SPAC222.03c	SPAC222.03c_G1	tim10	577	6.63958	-0.00841133	0.00592518	0.938643	0.995634	0	-0.0678687	0.376159	0.539666	0.708955	0	-0.10544	0.918372	0.337903	0.546064	0
G1	_	SPAC222.04c	SPAC222.04c_G1	ies6	694	6.70989	-0.0130402	0.0190212	0.890306	0.995634	0	0.0286649	0.0899908	0.764189	0.867132	0	0.123174	1.71275	0.190629	0.382101	0
G1	_	SPAC222.05c	SPAC222.05c_G1	mss1	2036	5.68431	-0.0119801	0.0113601	0.915119	0.995634	0	-0.0344005	0.0902727	0.763831	0.866883	0	-0.148317	1.70035	0.192243	0.384547	0
G1	_	SPAC222.06	SPAC222.06_G1	mak16	1178	6.39494	0.172241	2.35151	0.125162	0.889217	0	0.929235	71.9636	2.19209e-17	1.76126e-15	1	0.794064	52.6394	4.00773e-13	2.4624e-11	1
G1	_	SPAC222.07c	SPAC222.07c_G1	hri2	2229	7.23796	-0.0230762	0.0597863	0.806834	0.995634	0	-0.298038	9.60244	0.00194319	0.0107674	-1	-0.266086	7.80975	0.00519651	0.0283414	-1
G1	_	SPAC222.08c	SPAC222.08c_G1	sno1	1408	5.594	0.165281	1.833	0.175773	0.919597	0	-0.428918	11.0827	0.000871363	0.00567654	-1	-0.423415	11.1599	0.00083586	0.0064591	-1
G1	_	SPBC1861.05	SPBC1861.05_G1		4179	6.56275	-0.0319113	0.11474	0.734811	0.995634	0	-0.291147	9.01768	0.00267381	0.0140695	-1	-0.170039	3.19835	0.0737125	0.202044	0
G1	_	SPAC222.09	SPAC222.09_G1	seb1	2171	6.07202	0.0854132	0.374694	0.540457	0.995634	0	0.166523	1.40784	0.235416	0.416398	0	0.230335	2.73812	0.0979801	0.244985	0
G1	_	SPAC222.10c	SPAC222.10c_G1	byr4	2554	6.21693	0.0470669	0.213401	0.644115	0.995634	0	0.158854	2.39627	0.121625	0.265768	0	0.301953	9.03088	0.00265456	0.0165534	1
G1	_	SPBC18E5.12c	SPBC18E5.12c_G1	mas2	1593	6.39685	0.0919631	1.01142	0.314562	0.973112	0	0.314131	11.808	0.000589782	0.00405281	1	0.208739	5.27838	0.0215918	0.0849334	0
G1	_	SPAC222.11	SPAC222.11_G1	hem13	1428	7.49081	0.132138	1.51604	0.21822	0.937292	0	-0.108132	0.992865	0.319043	0.510062	0	-0.0954005	0.780885	0.376871	0.583605	0
G1	_	SPAC222.12c	SPAC222.12c_G1	atp2	1906	9.55471	0.325226	7.45583	0.00632313	0.338693	0	0.186904	2.45663	0.117029	0.258612	0	0.0870048	0.531441	0.466002	0.660432	0
G1	_	SPAC222.13c	SPAC222.13c_G1		2469	6.7414	0.0926326	0.591499	0.44184	0.995634	0	0.132432	1.19358	0.274608	0.460049	0	0.0945959	0.613612	0.433431	0.633598	0
G1	_	SPAC222.14c	SPAC222.14c_G1	sey1	2662	7.26379	-0.153024	2.44509	0.117893	0.876881	0	-0.168111	2.9028	0.0884256	0.214067	0	-0.193305	3.88561	0.0487016	0.151696	0
G1	_	SPBC18H10.14	SPBC18H10.14_G1	rps1601	727	8.53363	0.132658	0.958935	0.327455	0.978887	0	0.339731	6.26336	0.012326	0.0474199	1	0.211907	2.44132	0.118177	0.276143	0
G1	_	SPAC222.15	SPAC222.15_G1	meu13	651	3.4734	-0.0882766	0.177881	0.673201	0.995634	0	0.0705782	0.11267	0.737125	0.850122	0	-0.0713431	0.116886	0.732437	0.854767	0
G1	_	SPAC222.16c	SPAC222.16c_G1	csn3	1299	5.93443	0.0831128	0.48941	0.484191	0.995634	0	-0.0388946	0.102986	0.748276	0.858008	0	-0.0335056	0.0784594	0.779396	0.881051	0
G1	_	SPAC222.17	SPAC222.17_G1		649	5.59618	-0.0802116	0.388165	0.533265	0.995634	0	-0.423185	10.0679	0.00150878	0.00877138	-1	-0.33752	6.64801	0.00992664	0.0468451	-1
G1	_	SPAC222.18	SPAC222.18_G1		786	5.68264	0.0188956	0.025322	0.873567	0.995634	0	-0.142173	1.35974	0.243582	0.426524	0	-0.0527413	0.195262	0.658573	0.805479	0
G1	_	SPAC222.19	SPAC222.19_G1	lam3	354	4.7873	-0.154215	1.10694	0.292748	0.970725	0	0.0021594	0.000215406	0.98829	0.994479	0	0.110648	0.593805	0.440951	0.639242	0
G1	_	SPAC227.01c	SPAC227.01c_G1	erd1	1797	5.98328	-0.0153577	0.0175027	0.894749	0.995634	0	0.208386	3.22208	0.0726511	0.184334	0	0.113557	0.968326	0.325098	0.534951	0
G1	_	SPAC227.02c	SPAC227.02c_G1	rrp15	694	5.98647	0.0806591	0.332897	0.563958	0.995634	0	0.580796	17.6118	2.70909e-05	0.000286788	1	0.671556	23.9114	1.00874e-06	1.78078e-05	1
G1	_	SPAC227.03c	SPAC227.03c_G1	yea6	1748	5.11185	0.233017	3.29207	0.0696152	0.76856	0	0.216579	2.72927	0.0985245	0.230779	0	0.192414	2.22829	0.135504	0.302411	0
G1	_	SPAC227.04	SPAC227.04_G1	atg10	941	5.45392	0.112929	0.736277	0.390856	0.991043	0	0.0107513	0.00637236	0.936375	0.966287	0	0.29247	5.02904	0.0249257	0.0947297	0
G1	_	SPBC19F5.02c	SPBC19F5.02c_G1	utp4	2845	7.83107	0.124351	1.80095	0.179598	0.919597	0	0.247202	7.07736	0.00780641	0.0333716	1	0.225329	5.91944	0.0149748	0.0639043	0
G1	_	SPAC227.06	SPAC227.06_G1	yip5	1086	6.26147	-0.109187	0.938844	0.332575	0.981167	0	-0.105625	0.856063	0.354843	0.545049	0	-0.0921197	0.668758	0.413485	0.616754	0
G1	_	SPAC227.07c	SPAC227.07c_G1	pab1	2275	7.6013	0.0567053	0.295782	0.586539	0.995634	0	0.0873676	0.696482	0.403968	0.592758	0	0.0647105	0.384382	0.535268	0.713576	0
G1	_	SPAC227.08c	SPAC227.08c_G1	yth1	869	5.56478	0.231583	3.60058	0.0577594	0.710752	0	0.191256	2.3706	0.123639	0.269006	0	0.132549	1.15839	0.281799	0.490947	0
G1	_	SPAC227.09	SPAC227.09_G1	fol3	1880	5.77883	-0.086971	0.510649	0.474858	0.995634	0	-0.0705878	0.328046	0.566812	0.729107	0	-0.0674602	0.307788	0.579041	0.747292	0
G1	_	SPAC227.10	SPAC227.10_G1	pfd2	932	6.701	0.0274936	0.0776387	0.780523	0.995634	0	0.232976	5.55484	0.0184296	0.0649232	0	0.0570785	0.334246	0.563169	0.73491	0
G1	_	SPAC227.11c	SPAC227.11c_G1	yos9	3096	6.36548	0.112906	1.17941	0.277476	0.963832	0	0.00645315	0.00371445	0.951402	0.974573	0	0.0963295	0.853145	0.355664	0.564129	0
G1	_	SPAC227.12	SPAC227.12_G1	rna4	1782	6.55055	0.0450979	0.174818	0.675865	0.995634	0	0.585434	30.2981	3.70482e-08	7.58762e-07	1	0.440728	17.2272	3.31655e-05	0.000402807	1
G1	_	SPAC227.13c	SPAC227.13c_G1	isu1	1602	7.01618	-0.156567	1.06794	0.30141	0.970858	0	-0.457505	8.93603	0.002796	0.0145657	-1	-0.40027	6.88551	0.00868971	0.0425456	-1
G1	_	SPAC227.14	SPAC227.14_G1	yfh7	2407	6.59066	-0.130187	1.78084	0.182046	0.919597	0	-0.497818	24.4485	7.63248e-07	1.19284e-05	-1	-0.546792	30.0182	4.28004e-08	1.03564e-06	-1
G1	_	SPAC227.15	SPAC227.15_G1	reg1	3316	6.70322	-0.106587	0.568049	0.451035	0.995634	0	-0.236301	2.73731	0.0980298	0.230181	0	-0.194148	1.86622	0.171909	0.355445	0
G1	_	SPAC227.16c	SPAC227.16c_G1	psf3	857	5.74218	-0.0289643	0.0446974	0.832561	0.995634	0	-0.0548796	0.156117	0.692757	0.819252	0	-0.142981	1.07418	0.300004	0.508261	0
G1	_	SPAC227.17c	SPAC227.17c_G1		1109	6.50955	0.0315468	0.0724078	0.787863	0.995634	0	-0.154602	1.68183	0.194681	0.366496	0	0.00687778	0.00340838	0.953445	0.973324	0
G1	_	SPAC227.18	SPAC227.18_G1	lys3	1721	7.34944	-0.0898762	0.680191	0.409521	0.993196	0	-0.538685	23.5083	1.24378e-06	1.86033e-05	-1	-0.445058	16.3327	5.31402e-05	0.000617866	-1
G1	_	SPAC227.19c	SPAC227.19c_G1		252	3.85318	0.0903282	0.180387	0.671041	0.995634	0	0.207678	0.935432	0.333455	0.525727	0	0.221934	1.10664	0.292813	0.500016	0
G1	_	SPAC22A12.01c	SPAC22A12.01c_G1	pso2	3108	6.66726	0.00123155	0.000160729	0.989885	0.999311	0	0.426574	19.6719	9.19414e-06	0.000111883	1	0.33418	12.2104	0.000475235	0.00407986	1
G1	_	SPAC22A12.02c	SPAC22A12.02c_G1	mug103	375	1.30461	0.829049	2.53182	0.111572	0.862289	0	1.46966	8.7811	0.00304367	0.0155458	1	0.923019	3.26322	0.0708499	0.197516	0
G1	_	SPAC22A12.03c	SPAC22A12.03c_G1	csn4	1478	6.06582	-0.131718	1.04335	0.307043	0.970858	0	-0.325656	6.11984	0.0133673	0.0504657	0	-0.206436	2.53227	0.11154	0.26667	0
G1	_	SPAC22A12.04c	SPAC22A12.04c_G1	rps2201	699	9.88573	0.133062	1.45684	0.227434	0.947294	0	-0.047655	0.185938	0.666319	0.800119	0	-0.0703101	0.405925	0.524045	0.705671	0
G1	_	SPAC22A12.05	SPAC22A12.05_G1	rpc11	466	5.80826	0.169743	1.68182	0.194683	0.922423	0	0.844656	43.738	3.75418e-11	1.29986e-09	1	0.823994	42.3778	7.52402e-11	3.02263e-09	1
G1	_	SPAC22A12.06c	SPAC22A12.06c_G1	fsh2	1837	6.53401	0.212201	2.98797	0.0838854	0.801858	0	1.399	139.012	4.37695e-32	1.19262e-29	1	1.16707	96.6402	8.31412e-23	1.44735e-20	1
G1	_	SPBC211.01	SPBC211.01_G1	rsm10	2623	5.95724	-0.0451754	0.157733	0.691253	0.995634	0	-0.322263	7.53774	0.00604199	0.0269887	-1	-0.193587	2.84077	0.0919002	0.234026	0
G1	_	SPAC22A12.07c	SPAC22A12.07c_G1	ogm1	3182	8.71092	-0.0328984	0.0882408	0.766426	0.995634	0	-0.309859	7.74297	0.00539221	0.0247386	-1	-0.234348	4.45032	0.0348947	0.120488	0
G1	_	SPAC22A12.08c	SPAC22A12.08c_G1	crd1	1758	6.43657	-0.0851572	0.552783	0.457183	0.995634	0	-0.167807	2.09274	0.148	0.305406	0	0.0490892	0.185685	0.666533	0.811572	0
G1	_	SPBC211.03c	SPBC211.03c_G1	gea1	4850	7.66645	-0.300662	8.03451	0.00458945	0.304301	0	-0.349151	10.7068	0.00106742	0.00673669	-1	-0.23612	4.97511	0.0257145	0.0965566	0
G1	_	SPAC22A12.09c	SPAC22A12.09c_G1	sap114	1907	3.89306	-0.142636	0.484348	0.48646	0.995634	0	-0.045824	0.0490086	0.824797	0.90241	0	0.117197	0.340289	0.559662	0.73181	0
G1	_	SPAC22A12.10	SPAC22A12.10_G1	ept1	4543	8.67197	0.0468657	0.256737	0.612371	0.995634	0	0.288499	9.71723	0.00182548	0.0101963	1	0.377896	16.7758	4.20671e-05	0.000500255	1
G1	_	SPAC22A12.11	SPAC22A12.11_G1	dak1	2195	6.72145	-0.114974	0.706475	0.400616	0.991347	0	-0.536491	14.9055	0.000113031	0.000987957	-1	-0.608782	19.328	1.1008e-05	0.00014836	-1
G1	_	SPAC22A12.12c	SPAC22A12.12c_G1	rrp40	1217	6.18189	0.0686655	0.300337	0.583671	0.995634	0	-0.00979581	0.00594575	0.938537	0.967403	0	-0.116064	0.838539	0.359815	0.568144	0
G1	_	SPAC22A12.13	SPAC22A12.13_G1	mug84	974	4.9238	0.12232	0.858182	0.354248	0.983969	0	0.0942831	0.485333	0.486017	0.665763	0	0.110739	0.699605	0.402916	0.607136	0
G1	_	SPAC22A12.14c	SPAC22A12.14c_G1		1431	8.10935	0.0442733	0.0860564	0.769252	0.995634	0	-0.386091	6.42242	0.0112688	0.0446691	-1	-0.253583	2.79379	0.0946303	0.23888	0
G1	_	SPAC22A12.15c	SPAC22A12.15c_G1	bip1	2805	11.9917	0.0871076	0.617572	0.431951	0.995634	0	-0.30883	7.73645	0.00541171	0.0247762	-1	-0.281774	6.4405	0.0111548	0.0514778	0
G1	_	SPAC22A12.16	SPAC22A12.16_G1	acl2	1665	7.86813	0.0389342	0.122297	0.726556	0.995634	0	-0.0053073	0.00225369	0.962136	0.981905	0	-0.0163936	0.0215531	0.883282	0.937748	0
G1	_	SPAC22A12.17c	SPAC22A12.17c_G1		3670	3.56105	0.0615937	0.0886775	0.765865	0.995634	0	-0.303013	1.90776	0.167212	0.332041	0	-0.00946994	0.00206521	0.963753	0.980168	0
G1	_	SPAC22E12.01	SPAC22E12.01_G1	pet3	2015	3.94252	-0.168927	0.832906	0.361433	0.986778	0	0.279352	2.39693	0.121573	0.265748	0	0.419942	5.79732	0.0160506	0.0674191	0
G1	_	SPAC22E12.02	SPAC22E12.02_G1		1966	4.60124	-0.182899	1.41148	0.234811	0.947728	0	-0.0766904	0.242436	0.622452	0.772304	0	0.320513	4.70828	0.0300177	0.108207	0
G1	_	SPAC22E12.03c	SPAC22E12.03c_G1	sdj1	1023	6.5812	0.110956	1.03565	0.308836	0.972867	0	-0.1042	0.882333	0.347564	0.538207	0	-0.214808	3.77488	0.0520276	0.15913	0
G1	_	SPAC22E12.04	SPAC22E12.04_G1	ccs1	1094	7.20651	-0.0392073	0.120679	0.728299	0.995634	0	0.00295717	0.000675795	0.97926	0.99022	0	0.0472047	0.175629	0.675157	0.818099	0
G1	_	SPAC22E12.05c	SPAC22E12.05c_G1	rer1	1280	7.61101	-0.0485404	0.267948	0.604711	0.995634	0	-0.089667	0.899843	0.342824	0.533915	0	-0.0934456	0.988655	0.320071	0.530097	0
G1	_	SPAC22E12.06c	SPAC22E12.06c_G1	gmh3	2827	7.51238	-0.049361	0.28641	0.59253	0.995634	0	-0.108182	1.35037	0.245213	0.427707	0	0.0525589	0.32597	0.568042	0.738419	0
G1	_	SPAC22E12.07	SPAC22E12.07_G1	rna1	2823	6.5907	-0.00954413	0.0103412	0.919002	0.995634	0	-0.101846	1.13497	0.286718	0.472609	0	-0.059843	0.402697	0.5257	0.707291	0
G1	_	SPAC22E12.08	SPAC22E12.08_G1	rrn10	1162	6.52648	0.17794	3.02627	0.0819261	0.794785	0	0.208025	4.05162	0.0441289	0.126252	0	0.187202	3.33603	0.0677779	0.191767	0
G1	_	SPAC22E12.09c	SPAC22E12.09c_G1	krp1	2435	5.51856	-0.0730018	0.278212	0.597876	0.995634	0	-0.184538	1.71327	0.190562	0.36171	0	-0.198447	2.0263	0.154596	0.331686	0
G1	_	SPAC22E12.10c	SPAC22E12.10c_G1	etp1	2152	7.57212	0.0264561	0.0649029	0.798908	0.995634	0	-0.200893	3.6619	0.0556702	0.150296	0	-0.173993	2.77531	0.0957282	0.240549	0
G1	_	SPAC22E12.11c	SPAC22E12.11c_G1	set3	3895	6.43179	-0.133487	1.77944	0.182218	0.919597	0	-0.0215729	0.0458678	0.830416	0.904452	0	0.1971	4.01385	0.0451279	0.144074	0
G1	_	SPAC22E12.13c	SPAC22E12.13c_G1	rlp24	1086	7.38707	0.15498	1.84081	0.174856	0.919597	0	0.629737	30.5691	3.22192e-08	6.68602e-07	1	0.506698	19.8362	8.43691e-06	0.00011776	1
G1	_	SPAC22E12.14c	SPAC22E12.14c_G1	sck2	3406	7.86564	0.0613947	0.39543	0.529459	0.995634	0	0.0857711	0.765498	0.381613	0.571052	0	0.173198	3.15568	0.0756634	0.206166	0
G1	_	SPAC22E12.16c	SPAC22E12.16c_G1	pik1	2980	7.31766	0.0219933	0.0568677	0.811517	0.995634	0	-0.201182	4.60479	0.0318828	0.0991303	0	-0.127567	1.88834	0.169389	0.352307	0
G1	_	SPAC22E12.17c	SPAC22E12.17c_G1	glo3	2102	7.99924	-0.0791625	0.720834	0.39587	0.991043	0	-0.418978	19.645	9.32476e-06	0.000113033	-1	-0.376963	16.0805	6.0707e-05	0.000692989	-1
G1	_	SPAC22E12.18	SPAC22E12.18_G1		1134	6.91893	0.139805	1.36753	0.242236	0.947728	0	0.788825	44.3475	2.74969e-11	9.73577e-10	1	0.733655	38.4799	5.532e-10	1.91542e-08	1
G1	_	SPAC22E12.19	SPAC22E12.19_G1	snt1	2454	6.00221	0.0419629	0.0872703	0.767677	0.995634	0	-0.173208	1.43832	0.230412	0.410752	0	-0.32238	5.00854	0.0252226	0.0952832	0
G1	_	SPAC22F3.02	SPAC22F3.02_G1	atf31	2973	4.36018	0.199169	1.30833	0.252698	0.951104	0	0.252965	2.0606	0.15115	0.309258	0	0.272897	2.48642	0.114833	0.270243	0
G1	_	SPAC22F3.03c	SPAC22F3.03c_G1	rdh54	3718	5.93254	0.105801	0.862503	0.353039	0.983969	0	0.569119	25.7599	3.86632e-07	6.33431e-06	1	0.419785	14.0722	0.000175924	0.00174173	1
G1	_	SPAC22F3.05c	SPAC22F3.05c_G1	alp41	5579	7.24354	0.0327686	0.125903	0.722718	0.995634	0	0.124154	1.78901	0.181046	0.349006	0	0.164178	3.1854	0.0742987	0.203169	0
G1	_	SPAC22F3.06c	SPAC22F3.06c_G1	lon1	3617	8.04458	0.123046	1.49529	0.221398	0.940042	0	-0.207241	4.16191	0.0413428	0.120007	0	-0.235714	5.40691	0.0200571	0.080421	0
G1	_	SPAC22F3.07c	SPAC22F3.07c_G1	atp20	508	7.30155	0.227889	4.99294	0.0254509	0.562626	0	0.0408853	0.156491	0.692408	0.819252	0	0.0369691	0.129702	0.718741	0.847319	0
G1	_	SPAC22F3.08c	SPAC22F3.08c_G1	rok1	1778	6.12973	0.00736791	0.00448501	0.946605	0.995634	0	0.804342	57.4968	3.38525e-14	1.81328e-12	1	0.55483	27.1332	1.89905e-07	3.90207e-06	1
G1	_	SPAC22F3.09c	SPAC22F3.09c_G1	res2	2473	5.18895	-0.00949919	0.00436879	0.947301	0.995634	0	-0.0315866	0.0467464	0.828825	0.903723	0	-0.077914	0.290742	0.589745	0.754118	0
G1	_	SPAC22F3.10c	SPAC22F3.10c_G1	gcs1	2107	7.89374	0.00844033	0.0083216	0.927316	0.995634	0	-0.0774484	0.690496	0.405996	0.59448	0	-0.121207	1.70237	0.191978	0.384262	0
G1	_	SPAC22F3.11c	SPAC22F3.11c_G1	snu23	709	5.43787	0.0129077	0.0075982	0.930538	0.995634	0	0.383389	6.79051	0.00916438	0.0378348	1	0.368115	6.38296	0.0115221	0.0527023	0
G1	_	SPAC22F3.12c	SPAC22F3.12c_G1	rgs1	2829	7.02766	-0.337913	3.94272	0.0470745	0.659382	0	-0.393606	5.2989	0.0213389	0.0729971	0	-0.602644	12.2707	0.000460136	0.00396109	-1
G1	_	SPAC22F3.13	SPAC22F3.13_G1	tsc1	4324	6.92215	0.024061	0.0443255	0.833249	0.995634	0	-0.200408	2.99258	0.0836468	0.205413	0	-0.158781	1.90668	0.167332	0.349557	0
G1	_	SPAC22F3.15	SPAC22F3.15_G1	aim41	372	4.48096	0.030546	0.047195	0.828018	0.995634	0	-0.290005	3.78627	0.0516747	0.142287	0	-0.142864	0.993539	0.318879	0.529521	0
G1	_	SPAC22F8.02c	SPAC22F8.02c_G1	pvg5	1119	5.07341	-0.322177	4.4203	0.0355138	0.611278	0	0.0772352	0.259326	0.610583	0.76256	0	0.191911	1.66677	0.196692	0.390195	0
G1	_	SPAC22F8.04	SPAC22F8.04_G1	pet1	1815	5.74209	-0.515975	13.0504	0.000303218	0.0615962	0	-0.126311	0.794792	0.372655	0.561942	0	-0.202038	2.05266	0.151941	0.327221	0
G1	_	SPAC22F8.05	SPAC22F8.05_G1		3372	7.53414	0.283586	1.63104	0.20156	0.93071	0	-0.494888	4.84532	0.0277213	0.089367	0	-0.476698	4.46548	0.0345863	0.119687	0
G1	_	SPAC22F8.06	SPAC22F8.06_G1	pam1	1073	7.71073	-0.0479667	0.20553	0.650293	0.995634	0	0.0783133	0.545879	0.460006	0.641623	0	0.105568	0.999196	0.317505	0.52822	0
G1	_	SPAC22F8.07c	SPAC22F8.07c_G1	rtf1	1891	5.83625	-0.0730387	0.377531	0.538927	0.995634	0	0.532679	21.0755	4.41549e-06	5.72916e-05	1	0.394822	11.68	0.000631747	0.00516187	1
G1	_	SPAC22F8.08	SPAC22F8.08_G1	sec24	3112	8.44352	-0.12809	2.05802	0.151407	0.912912	0	-0.169736	3.57818	0.0585432	0.156523	0	-0.0155069	0.0302492	0.861926	0.926693	0
G1	_	SPAC22F8.09	SPAC22F8.09_G1	rrp16	1498	7.4498	0.0690412	0.350876	0.553618	0.995634	0	0.571033	24.1382	8.96618e-07	1.37723e-05	1	0.431636	13.8132	0.000201918	0.00195582	1
G1	_	SPAC22F8.10c	SPAC22F8.10c_G1	sap145	1941	6.29732	0.069328	0.38499	0.534945	0.995634	0	0.349589	9.85283	0.00169571	0.0096259	1	0.2903	6.85713	0.00882882	0.0429216	1
G1	_	SPAC22F8.11	SPAC22F8.11_G1	plc1	4062	7.2105	0.0554845	0.240025	0.624188	0.995634	0	0.125936	1.22311	0.268751	0.453603	0	0.128018	1.27829	0.258218	0.46555	0
G1	_	SPAC22F8.12c	SPAC22F8.12c_G1	shf1	3425	5.52516	0.0949485	0.46929	0.493314	0.995634	0	0.325967	5.5307	0.0186857	0.0656407	0	0.296258	4.64777	0.0310938	0.110706	0
G1	_	SPAC22G7.01c	SPAC22G7.01c_G1	fra1	2179	7.4101	-0.0952602	0.868782	0.351293	0.983844	0	-0.061896	0.362927	0.546885	0.713253	0	-0.00748488	0.0053783	0.941538	0.968446	0
G1	_	SPAC22G7.02	SPAC22G7.02_G1	kap111	3219	6.82131	0.0992961	0.957623	0.327787	0.978887	0	0.0240691	0.0549679	0.814634	0.895983	0	-0.00235541	0.000534174	0.981561	0.990251	0
G1	_	SPBC21C3.17c	SPBC21C3.17c_G1	psg1	1101	6.42263	-0.0717062	0.471285	0.492397	0.995634	0	-0.296716	7.68316	0.00557385	0.0253493	-1	-0.266051	6.34935	0.0117424	0.0533886	0
G1	_	SPAC22G7.03	SPAC22G7.03_G1		827	4.67642	0.219853	2.3215	0.127597	0.889217	0	0.00943146	0.00394062	0.949946	0.973856	0	0.029241	0.0397655	0.84194	0.915412	0
G1	_	SPAC22G7.04	SPAC22G7.04_G1	pan2	3459	7.36815	-0.000120068	1.5765e-06	0.998998	0.999966	0	-0.153753	2.51397	0.112842	0.253197	0	-0.0661371	0.473815	0.491237	0.682008	0
G1	_	SPAC22G7.05	SPAC22G7.05_G1	kri1	1934	6.63621	0.0598437	0.292363	0.58871	0.995634	0	0.46628	18.0206	2.18526e-05	0.000239006	1	0.319054	8.44408	0.00366234	0.0215916	1
G1	_	SPAC22G7.06c	SPAC22G7.06c_G1	ura1	6951	11.4768	-0.0690852	0.283523	0.594402	0.995634	0	-0.0366097	0.0794915	0.777988	0.874401	0	-0.0575754	0.196741	0.657364	0.804786	0
G1	_	SPAC22G7.07c	SPAC22G7.07c_G1	ime4	2435	6.21612	0.128576	1.49805	0.220971	0.939875	0	0.114611	1.15678	0.282135	0.467638	0	0.00755464	0.00506878	0.943242	0.969383	0
G1	_	SPAC22G7.08	SPAC22G7.08_G1	ppk8	2207	5.36777	-0.0105034	0.00683349	0.934118	0.995634	0	0.214901	2.86292	0.0906426	0.216733	0	0.102625	0.662542	0.415664	0.618463	0
G1	_	SPAC22G7.09c	SPAC22G7.09c_G1	nup45	1586	5.9694	-0.150912	2.01129	0.156132	0.919597	0	0.0543594	0.260378	0.609861	0.762347	0	0.00736332	0.00487708	0.944324	0.969838	0
G1	_	SPAC22G7.10	SPAC22G7.10_G1	iss1	1961	6.3603	0.0997105	0.768958	0.38054	0.991043	0	0.0791492	0.474287	0.491022	0.669692	0	0.0222282	0.0378664	0.845712	0.916651	0
G1	_	SPAC22G7.11c	SPAC22G7.11c_G1	cum1	706	3.22808	-0.0871188	0.145788	0.702594	0.995634	0	-0.127688	0.296245	0.586246	0.745518	0	-0.116278	0.25768	0.611718	0.772389	0
G1	_	SPAC22H10.02	SPAC22H10.02_G1		971	4.93088	-0.0230936	0.0158682	0.899756	0.995634	0	0.460804	6.46781	0.0109846	0.0437638	1	0.505618	7.99993	0.00467793	0.0261056	1
G1	_	SPAC22H10.03c	SPAC22H10.03c_G1	kap114	3261	8.11284	0.208686	4.25581	0.0391163	0.626961	0	-0.282428	7.60388	0.00582429	0.0261855	-1	-0.283352	7.70521	0.00550616	0.0295438	-1
G1	_	SPAC22H10.04	SPAC22H10.04_G1	ppa3	1840	6.01136	-0.108087	1.24086	0.265306	0.954461	0	-0.126171	1.62549	0.202328	0.376482	0	-0.128746	1.75227	0.185592	0.374953	0
G1	_	SPAC22H10.05c	SPAC22H10.05c_G1		2591	7.2021	0.153529	2.58509	0.107874	0.859776	0	-0.137388	1.99673	0.157639	0.31848	0	-0.19359	4.00073	0.0454805	0.144683	0
G1	_	SPAC22H10.07	SPAC22H10.07_G1	scd2	2631	6.09635	-0.103356	0.572605	0.449225	0.995634	0	0.0907853	0.441422	0.506437	0.682693	0	0.273667	4.10971	0.0426377	0.138595	0
G1	_	SPBC23G7.16	SPBC23G7.16_G1	ctr6	894	6.6726	-0.0521509	0.302578	0.582271	0.995634	0	-0.25185	6.71933	0.00953732	0.0390912	-1	-0.0558836	0.34677	0.555947	0.7292	0
G1	_	SPAC22H10.08	SPAC22H10.08_G1		1896	6.67057	0.0383907	0.150788	0.697784	0.995634	0	0.0347677	0.120991	0.727962	0.843903	0	0.00927514	0.00874101	0.925512	0.960613	0
G1	_	SPAC22H10.09	SPAC22H10.09_G1	cbp8	2322	6.8195	-0.029892	0.0841293	0.771778	0.995634	0	-0.406319	14.8291	0.000117706	0.00102595	-1	-0.56281	28.4817	9.45894e-08	2.0727e-06	-1
G1	_	SPAC22H10.10	SPAC22H10.10_G1	alp21	1858	5.79423	-0.219151	2.56259	0.109419	0.862289	0	-0.0628284	0.209077	0.647492	0.788606	0	-0.0247105	0.0330268	0.855793	0.923764	0
G1	_	SPAC22H10.11c	SPAC22H10.11c_G1	crf1	2427	7.68659	-0.0695361	0.51762	0.471859	0.995634	0	0.473381	24.3564	8.00599e-07	1.245e-05	1	0.453309	22.4847	2.11829e-06	3.47522e-05	1
G1	_	SPAC22H10.12c	SPAC22H10.12c_G1	gdi1	1753	7.99578	0.0693512	0.523451	0.469373	0.995634	0	-0.0768311	0.632894	0.426296	0.611769	0	-0.0273431	0.0808682	0.776124	0.878925	0
G1	_	SPAC22H10.13	SPAC22H10.13_G1	zym1	511	6.05601	-0.154986	0.570788	0.449946	0.995634	0	-0.613287	8.62103	0.00332303	0.0166338	-1	-0.883074	17.8569	2.38155e-05	0.000299101	-1
G1	_	SPBC25B2.09c	SPBC25B2.09c_G1	mrs1	2369	9.57788	0.0495496	0.31196	0.57648	0.995634	0	0.249035	7.87001	0.00502614	0.0233325	1	0.190333	4.60572	0.0318655	0.112635	0
G1	_	SPBC27B12.01c	SPBC27B12.01c_G1	mmm1	2122	5.83054	0.189605	2.21489	0.136685	0.903355	0	0.334059	6.82308	0.00899873	0.0372244	1	0.212139	2.78016	0.0954385	0.240206	0
G1	_	SPAC22H12.01c	SPAC22H12.01c_G1	mug35	1255	9.73476	0.037865	0.0685662	0.793436	0.995634	0	-0.502398	11.871	0.000570142	0.00396128	-1	-0.631326	18.8502	1.41397e-05	0.000187344	-1
G1	_	SPAC22H12.02	SPAC22H12.02_G1	tfg3	2242	8.64493	0.0459973	0.204476	0.651132	0.995634	0	0.175057	2.94883	0.0859395	0.209679	0	0.136449	1.79792	0.179964	0.366895	0
G1	_	SPAC22H12.03	SPAC22H12.03_G1		1108	5.73936	-0.0188722	0.0171247	0.895885	0.995634	0	-0.283636	3.70095	0.0543817	0.147729	0	-0.273216	3.49316	0.0616229	0.17954	0
G1	_	SPAC22H12.04c	SPAC22H12.04c_G1	rps102	950	9.85929	0.142231	1.87925	0.17042	0.919597	0	-0.0413865	0.15843	0.690606	0.818462	0	0.0670502	0.416709	0.518584	0.701482	0
G1	_	SPBC27B12.09c	SPBC27B12.09c_G1	flx1	1511	6.24894	0.271047	7.17879	0.00737703	0.355629	0	0.404154	15.7802	7.1145e-05	0.000663491	1	0.288056	8.09652	0.00443503	0.0251078	1
G1	_	SPAC22H12.05c	SPAC22H12.05c_G1	fsc1	2798	5.96257	0.0691281	0.269862	0.603425	0.995634	0	-0.250725	3.39829	0.0652642	0.169961	0	-0.42085	9.60183	0.00194384	0.0129321	-1
G1	_	SPAC23A1.02c	SPAC23A1.02c_G1	ted1	2011	5.92552	-0.199126	1.38426	0.239378	0.947728	0	0.342608	4.16403	0.041291	0.119968	0	0.331275	3.91729	0.0477917	0.149973	0
G1	_	SPAC23A1.03	SPAC23A1.03_G1	apt1	795	7.89194	0.307292	8.94058	0.00278905	0.243496	0	1.40106	189.155	4.86234e-43	2.77021e-40	1	1.31175	166.529	4.23983e-38	1.7714e-35	1
G1	_	SPBC29A3.14c	SPBC29A3.14c_G1	trt1	3022	7.35222	0.0689156	0.520329	0.470702	0.995634	0	0.23967	6.26522	0.0123131	0.0474009	1	0.0253976	0.0701695	0.79109	0.88801	0
G1	_	SPAC23A1.04c	SPAC23A1.04c_G1	mnl1	3225	6.80649	-0.0311669	0.132065	0.716301	0.995634	0	-0.094887	1.18324	0.276698	0.461556	0	-0.15015	3.01554	0.0824702	0.219186	0
G1	_	SPBC2G2.15c	SPBC2G2.15c_G1	mrm2	1519	3.79281	0.414916	4.28397	0.0384733	0.62634	0	0.528679	6.83954	0.00891617	0.0369073	1	0.498425	6.27389	0.012253	0.0550271	0
G1	_	SPAC23A1.05	SPAC23A1.05_G1	tsc3	1090	7.03235	0.0401982	0.156218	0.692663	0.995634	0	-0.0901266	0.762689	0.382488	0.571565	0	0.0689711	0.459696	0.497766	0.687872	0
G1	_	SPAC23A1.06c	SPAC23A1.06c_G1	cmk2	1940	4.39001	0.242853	1.54346	0.214104	0.934145	0	0.248851	1.57308	0.209761	0.385391	0	0.0147645	0.00550851	0.940836	0.968446	0
G1	_	SPAC23A1.07	SPAC23A1.07_G1	rnf170	1013	4.86502	0.119156	0.709038	0.399763	0.991347	0	0.114723	0.632913	0.426289	0.611769	0	0.0968423	0.466933	0.494401	0.684732	0
G1	_	SPAC23A1.08c	SPAC23A1.08c_G1	rpl3401	489	10.6956	0.121558	1.38157	0.239834	0.947728	0	0.0513878	0.246279	0.619707	0.769965	0	0.106576	1.05986	0.303247	0.511148	0
G1	_	SPAC23A1.09	SPAC23A1.09_G1	rbm8	1228	6.47115	0.143702	2.30647	0.128836	0.889217	0	0.0418447	0.187989	0.664596	0.799202	0	-0.0583392	0.369819	0.543103	0.719278	0
G1	_	SPAC23A1.10	SPAC23A1.10_G1	tef102	1451	7.71658	0.0577085	0.292484	0.588633	0.995634	0	-0.0635715	0.349979	0.554125	0.720179	0	-0.0397954	0.138321	0.709956	0.840303	0
G1	_	SPAC23A1.11	SPAC23A1.11_G1	rpl1602	801	5.81433	-0.124857	0.70997	0.399454	0.991347	0	-0.476117	9.78553	0.00175891	0.00989503	-1	-0.399218	7.05227	0.0079165	0.0396267	-1
G1	_	SPAC23A1.12c	SPAC23A1.12c_G1	frs1	1988	8.21984	-0.0881644	0.574858	0.448335	0.995634	0	-0.238098	4.14083	0.0418607	0.121398	0	-0.209889	3.23949	0.0718828	0.199332	0
G1	_	SPAC23A1.14c	SPAC23A1.14c_G1		1934	5.94791	-0.275923	5.21899	0.0223416	0.544804	0	-0.0823826	0.463712	0.495894	0.67399	0	-0.162999	1.83993	0.17496	0.360089	0
G1	_	SPAC23A1.15c	SPAC23A1.15c_G1	sec20	1024	5.83336	0.157705	1.87057	0.17141	0.919597	0	0.135226	1.33109	0.248612	0.431316	0	0.0764021	0.432044	0.510988	0.696165	0
G1	_	SPAC23A1.16c	SPAC23A1.16c_G1	rtr1	1089	4.1175	0.17931	1.16456	0.280522	0.964913	0	0.507224	9.5464	0.00200342	0.0110718	1	0.233857	2.01264	0.155993	0.333211	0
G1	_	SPAC23A1.17	SPAC23A1.17_G1	bbc1	5343	7.1979	-0.601006	12.9713	0.000316311	0.0615962	0	-0.00446784	0.000732149	0.978413	0.989785	0	0.129372	0.618842	0.431478	0.63194	0
G1	_	SPAC23A1.18c	SPAC23A1.18c_G1	mrp51	1758	5.20908	-0.280162	4.72258	0.0297691	0.59453	0	-0.0983522	0.577355	0.447351	0.630578	0	-0.180335	1.97896	0.1595	0.338041	0
G1	_	SPAC23A1.19c	SPAC23A1.19c_G1	hrq1	3414	7.15855	-0.0729156	0.598278	0.439236	0.995634	0	0.142496	2.28412	0.130704	0.279996	0	0.0836527	0.794958	0.372605	0.580123	0
G1	_	SPAC23A1.20	SPAC23A1.20_G1	new11	519	5.19313	0.0312431	0.0331364	0.855556	0.995634	0	-0.0530541	0.0923908	0.761159	0.865068	0	-0.00144746	7.00957e-05	0.99332	0.995336	0
G1	_	SPAC23C11.01	SPAC23C11.01_G1	ice2	2551	6.20546	-0.0255689	0.0512991	0.820818	0.995634	0	0.43838	15.4695	8.38453e-05	0.000758238	1	0.320698	8.33313	0.00389284	0.0225893	1
G1	_	SPAC23C11.02c	SPAC23C11.02c_G1	rps23	514	10.389	0.134155	1.80936	0.178585	0.919597	0	-0.0480439	0.231264	0.630588	0.77732	0	-0.06713	0.451791	0.501486	0.690121	0
G1	_	SPAC23C11.03	SPAC23C11.03_G1	mpp10	2078	6.98398	-0.039685	0.174279	0.676337	0.995634	0	0.538746	33.1872	8.37003e-09	1.88516e-07	1	0.512667	30.3788	3.55395e-08	8.86359e-07	1
G1	_	SPBC2G5.06c	SPBC2G5.06c_G1	hmt2	1952	7.49265	-0.210579	2.61279	0.106005	0.853477	0	-0.381783	8.42445	0.00370208	0.0181944	-1	-0.243763	3.46488	0.0626851	0.181446	0
G1	_	SPAC23C11.04c	SPAC23C11.04c_G1	pnk1	3342	4.90634	-0.266211	3.15199	0.0758345	0.779265	0	-0.419537	7.41016	0.00648565	0.0285573	-1	-0.573883	13.9915	0.000183639	0.00180386	-1
G1	_	SPAC23C11.05	SPAC23C11.05_G1	ipp1	1320	9.35916	0.000603087	3.2015e-05	0.995485	0.999633	0	0.263141	6.09695	0.0135416	0.0510006	0	0.281797	7.00782	0.00811542	0.0403326	1
G1	_	SPAC23C11.06c	SPAC23C11.06c_G1		1967	6.32921	-0.0830457	0.295134	0.586949	0.995634	0	-0.413278	7.05705	0.00789541	0.0336831	-1	-0.436721	7.98096	0.0047272	0.0262636	-1
G1	_	SPAC23C11.08	SPAC23C11.08_G1	php3	351	5.04968	-0.205404	2.29387	0.129886	0.889217	0	-0.121678	0.786878	0.375046	0.56446	0	-0.0161287	0.0145539	0.903977	0.95054	0
G1	_	SPAC23C11.09	SPAC23C11.09_G1	ala1	3091	9.3265	-0.0180726	0.0352235	0.851128	0.995634	0	-0.233957	5.85614	0.0155228	0.0568232	0	-0.216539	5.03158	0.0248892	0.0947058	0
G1	_	SPAC23C11.10	SPAC23C11.10_G1	mpn1	798	4.74681	-0.290559	3.76906	0.0522091	0.688283	0	0.0993831	0.453704	0.500581	0.678448	0	0.0796748	0.300585	0.583516	0.749452	0
G1	_	SPAC23C11.11	SPAC23C11.11_G1	cka1	1810	8.19332	0.0186826	0.0455619	0.830974	0.995634	0	0.301214	11.8568	0.000574514	0.00398724	1	0.264054	9.16556	0.00246612	0.0156271	1
G1	_	SPAC23C11.12	SPAC23C11.12_G1	hcn1	243	4.65805	0.112381	0.315343	0.57442	0.995634	0	0.303383	2.29007	0.130204	0.279353	0	0.430661	4.78235	0.0287529	0.105058	0
G1	_	SPAC23C11.13c	SPAC23C11.13c_G1	hpt1	1047	6.35652	0.199635	1.72007	0.189683	0.920373	0	0.876904	33.6434	6.62006e-09	1.55386e-07	1	0.718415	22.6027	1.992e-06	3.28523e-05	1
G1	_	SPAC23C11.14	SPAC23C11.14_G1	zhf1	1428	8.09196	-0.0203556	0.0321607	0.857675	0.995634	0	0.143157	1.58269	0.208374	0.383631	0	0.123658	1.18726	0.275883	0.485002	0
G1	_	SPAC23C11.15	SPAC23C11.15_G1	pst2	3601	7.50742	0.0202388	0.0426173	0.836448	0.995634	0	0.059759	0.367899	0.544152	0.711714	0	-0.0258123	0.0690208	0.792768	0.889575	0
G1	_	SPAC23C11.16	SPAC23C11.16_G1	plo1	2604	5.30881	0.0308182	0.0486429	0.825442	0.995634	0	0.298888	4.60447	0.0318887	0.0991303	0	0.36163	6.96148	0.00832829	0.0410325	1
G1	_	SPAC23C11.17	SPAC23C11.17_G1	mdm28	1762	7.20502	0.104324	1.17827	0.277708	0.963832	0	0.388775	16.4083	5.10599e-05	0.000493815	1	0.328763	11.8139	0.00058791	0.00486715	1
G1	_	SPAC23C4.02	SPAC23C4.02_G1	crn1	1903	7.40255	-0.050104	0.216806	0.641484	0.995634	0	-0.514792	22.0801	2.61505e-06	3.54729e-05	-1	-0.418876	14.8885	0.000114054	0.00119328	-1
G1	_	SPBC2G5.07c	SPBC2G5.07c_G1	rpc25	2142	6.44957	0.0546318	0.261686	0.608964	0.995634	0	0.313089	8.61642	0.00333146	0.0166568	1	0.199906	3.53378	0.0601307	0.176671	0
G1	_	SPBC30B4.05	SPBC30B4.05_G1	kap109	3164	7.19768	-0.308066	6.44425	0.0111312	0.411059	0	-0.349958	8.22312	0.00413601	0.0199081	-1	-0.154184	1.62756	0.202041	0.396925	0
G1	_	SPAC23C4.03	SPAC23C4.03_G1	hrk1	1697	7.95425	-0.0307647	0.0997893	0.752083	0.995634	0	-0.35873	13.2531	0.000272135	0.00212556	-1	-0.447635	20.7003	5.3707e-06	7.86406e-05	-1
G1	_	SPAC23C4.04c	SPAC23C4.04c_G1		423	4.58222	-0.184148	1.31331	0.251796	0.951104	0	0.276075	3.07248	0.0796279	0.197244	0	0.225215	2.09927	0.147369	0.320864	0
G1	_	SPAC23C4.05c	SPAC23C4.05c_G1	les1	1575	6.21013	0.0659464	0.411276	0.521323	0.995634	0	0.0500419	0.230145	0.631416	0.778035	0	0.0581559	0.318081	0.572763	0.742442	0
G1	_	SPAC23C4.06c	SPAC23C4.06c_G1	efm6	3513	6.47517	0.0480051	0.205579	0.650255	0.995634	0	0.0959999	0.80979	0.368182	0.557294	0	-0.215703	4.03132	0.0446629	0.143099	0
G1	_	SPAC23C4.07	SPAC23C4.07_G1	tht2	2817	4.32198	0.00344979	0.000372718	0.984597	0.9991	0	0.350505	3.94463	0.0470212	0.132205	0	0.329729	3.59462	0.0579669	0.172333	0
G1	_	SPAC23C4.08	SPAC23C4.08_G1	rho3	1272	7.66836	0.128129	1.99528	0.15779	0.919597	0	0.161517	3.13182	0.0767779	0.192236	0	0.259625	8.2151	0.00415431	0.0238198	1
G1	_	SPAC23C4.09c	SPAC23C4.09c_G1		1802	6.52937	0.00505417	0.00210605	0.963397	0.995634	0	0.230915	4.38603	0.0362347	0.109041	0	0.350954	10.402	0.00125881	0.00913072	1
G1	_	SPAC23C4.10	SPAC23C4.10_G1	sec2	1945	5.01988	0.116296	0.594566	0.440659	0.995634	0	0.105106	0.470777	0.49263	0.671193	0	0.140585	0.868326	0.351419	0.559539	0
G1	_	SPAC23C4.11	SPAC23C4.11_G1	atp18	584	6.01414	0.172625	2.24871	0.133726	0.898088	0	0.0272632	0.053785	0.816603	0.897204	0	-0.0873336	0.5596	0.454421	0.649307	0
G1	_	SPAC23C4.12	SPAC23C4.12_G1	hhp2	1928	6.38834	0.0485644	0.139178	0.7091	0.995634	0	0.0368708	0.0787325	0.779023	0.874401	0	-0.0441165	0.113578	0.736107	0.857306	0
G1	_	SPBC30D10.06	SPBC30D10.06_G1	lsm4	2742	7.14001	0.175884	3.52811	0.0603364	0.721619	0	0.250072	7.04489	0.00794917	0.0338434	1	0.132177	1.98009	0.159381	0.338041	0
G1	_	SPAC23C4.13	SPAC23C4.13_G1	bet1	968	5.16253	0.0766347	0.214641	0.643154	0.995634	0	0.318512	3.70201	0.0543468	0.147698	0	0.189447	1.32542	0.249622	0.456354	0
G1	_	SPAC23C4.14	SPAC23C4.14_G1	alg1	1384	5.62481	-0.0660373	0.339687	0.56001	0.995634	0	-0.00857714	0.00558131	0.940447	0.96778	0	-0.0759894	0.447699	0.50343	0.69143	0
G1	_	SPAC23C4.15	SPAC23C4.15_G1	rpb5	967	6.8393	0.0333656	0.11041	0.739678	0.995634	0	0.13078	1.67519	0.195565	0.367216	0	-0.0256841	0.0647294	0.799171	0.892878	0
G1	_	SPAC23C4.16c	SPAC23C4.16c_G1	atg15	1730	7.12835	0.104627	1.15941	0.281589	0.966438	0	-0.121989	1.52621	0.216682	0.393671	0	-0.153292	2.44052	0.118237	0.276155	0
G1	_	SPAC23C4.17	SPAC23C4.17_G1	trm402	3173	7.01623	0.091124	0.949614	0.329818	0.979149	0	0.39073	17.5633	2.77893e-05	0.000293191	1	0.272702	8.5967	0.00336773	0.0201389	1
G1	_	SPAC23C4.18c	SPAC23C4.18c_G1	rad4	4538	5.69271	0.104955	0.830314	0.362182	0.986798	0	0.257819	4.9597	0.0259447	0.0848178	0	0.0993013	0.741098	0.389309	0.595219	0
G1	_	SPAC23C4.19	SPAC23C4.19_G1	spt5	3226	7.47905	-0.0282323	0.0742334	0.78527	0.995634	0	-0.27936	7.08373	0.00777871	0.0332759	-1	-0.29057	7.7258	0.00544374	0.0293092	-1
G1	_	SPAC23D3.01	SPAC23D3.01_G1	pdp3	1375	5.74193	-0.0861119	0.591455	0.441857	0.995634	0	0.0929178	0.685084	0.407842	0.595375	0	-0.0679903	0.368553	0.543794	0.720041	0
G1	_	SPBC31E1.02c	SPBC31E1.02c_G1	pmr1	3894	8.5195	-0.031192	0.10785	0.742605	0.995634	0	-0.271373	8.04473	0.00456363	0.0215851	-1	-0.204535	4.60913	0.0318022	0.112601	0
G1	_	SPAC23D3.03c	SPAC23D3.03c_G1		2068	7.27464	0.113871	1.24609	0.2643	0.954461	0	0.213123	4.3364	0.0373056	0.111142	0	0.166839	2.67862	0.101704	0.250837	0
G1	_	SPAC23D3.04c	SPAC23D3.04c_G1	gpd2	1810	7.90141	0.0748188	0.550841	0.457974	0.995634	0	-1.05624	102.086	5.31721e-24	9.0711e-22	-1	-0.911707	77.5776	1.2761e-18	1.51089e-16	-1
G1	_	SPAC23D3.05c	SPAC23D3.05c_G1		1599	4.38018	0.0255381	0.0256917	0.872656	0.995634	0	0.454893	8.50318	0.00354526	0.0175637	1	0.446563	8.56541	0.0034261	0.02041	1
G1	_	SPAC23D3.06c	SPAC23D3.06c_G1	nup146	4449	8.04296	-0.087465	0.695014	0.404464	0.992473	0	-0.256118	5.87138	0.015389	0.0564324	0	-0.204753	3.7847	0.0517232	0.158508	0
G1	_	SPAC23D3.07	SPAC23D3.07_G1	pup1	1454	8.21936	0.0989735	0.888167	0.345974	0.983844	0	0.163678	2.41638	0.120072	0.263293	0	0.246058	5.48767	0.0191511	0.0778107	0
G1	_	SPAC23D3.08	SPAC23D3.08_G1	usp108	2771	6.65512	-0.0270449	0.0550632	0.814476	0.995634	0	0.133446	1.3306	0.248698	0.431316	0	0.147843	1.65819	0.197847	0.391633	0
G1	_	SPBC32C12.02	SPBC32C12.02_G1	ste11	4089	7.02455	-0.402561	6.77307	0.00925434	0.375942	0	-0.467364	9.0347	0.00264902	0.0139743	-1	-0.451648	8.43554	0.00367958	0.0216191	-1
G1	_	SPAC23D3.09	SPAC23D3.09_G1	arp42	2925	7.04737	0.130271	1.49651	0.221209	0.939875	0	0.12442	1.3435	0.246417	0.429328	0	0.127942	1.43447	0.231036	0.434806	0
G1	_	SPAC23D3.10c	SPAC23D3.10c_G1	eng2	2833	6.87767	-0.098324	0.910254	0.340047	0.983844	0	0.0202296	0.0381872	0.845068	0.914214	0	0.0430353	0.176033	0.674805	0.81783	0
G1	_	SPAC23D3.11	SPAC23D3.11_G1	ayr1	2972	3.96333	0.218849	1.14921	0.283714	0.966686	0	-0.079223	0.139947	0.708334	0.830324	0	0.00459332	0.00049137	0.982315	0.990534	0
G1	_	SPAC23D3.12	SPAC23D3.12_G1	pho842	2633	8.84883	-0.117898	0.491199	0.483393	0.995634	0	-0.707744	17.2934	3.20304e-05	0.000328534	-1	-0.706072	17.21	3.34673e-05	0.000404926	-1
G1	_	SPAC23D3.13c	SPAC23D3.13c_G1		4973	8.09134	-0.0244429	0.0546739	0.815121	0.995634	0	0.00374073	0.00127341	0.971534	0.98682	0	0.105984	1.03181	0.309734	0.518872	0
G1	_	SPBC32F12.07c	SPBC32F12.07c_G1		2530	6.10219	-0.211111	3.18434	0.0743469	0.778895	0	-0.403567	11.1421	0.000843923	0.00553808	-1	-0.279526	5.54116	0.0185742	0.0759823	0
G1	_	SPAC23D3.14c	SPAC23D3.14c_G1	aah2	1746	5.31118	-0.0778122	0.309203	0.57817	0.995634	0	0.137032	0.957486	0.327821	0.519852	0	0.0963078	0.480835	0.488044	0.678778	0
G1	_	SPAC23D3.16	SPAC23D3.16_G1	lam4	692	4.7043	-0.015799	0.0105285	0.918274	0.995634	0	0.217105	1.99025	0.158315	0.319119	0	0.177896	1.377	0.240613	0.445868	0
G1	_	SPAC23D3.17	SPAC23D3.17_G1		1049	5.68017	-0.156889	1.21415	0.270512	0.958778	0	0.148381	1.0906	0.296337	0.484136	0	0.103807	0.544184	0.460704	0.655147	0
G1	_	SPAC23E2.01	SPAC23E2.01_G1	fep1	3521	7.0273	-0.193677	2.46298	0.116558	0.873764	0	-0.250603	4.04671	0.0442576	0.126476	0	-0.14829	1.44322	0.22962	0.43292	0
G1	_	SPAC23E2.02	SPAC23E2.02_G1	lsd2	4018	6.67867	-0.228659	4.9823	0.025608	0.563106	0	-0.0268996	0.0688044	0.793086	0.883408	0	-0.105283	1.06609	0.301831	0.509665	0
G1	_	SPAC23E2.03c	SPAC23E2.03c_G1	ste7	2744	4.60833	-0.586713	4.57508	0.0324402	0.608691	0	-0.435228	2.46864	0.116138	0.257893	0	-0.385372	1.94199	0.163453	0.343745	0
G1	_	SPBC354.07c	SPBC354.07c_G1	osh42	1826	7.48334	0.138315	1.83247	0.175836	0.919597	0	0.279287	7.43961	0.00638036	0.0281758	1	0.196805	3.70994	0.0540895	0.163758	0
G1	_	SPAC23G3.01	SPAC23G3.01_G1	rpb2	3757	8.74294	-0.0471813	0.251868	0.615763	0.995634	0	-0.112202	1.41448	0.234315	0.415286	0	-0.038494	0.167622	0.682234	0.821673	0
G1	_	SPAC23G3.02c	SPAC23G3.02c_G1	sib1	15022	9.57628	-0.143387	2.09304	0.147971	0.909386	0	0.0800254	0.652012	0.419394	0.605885	0	0.159061	2.58627	0.107794	0.261442	0
G1	_	SPAC23G3.03	SPAC23G3.03_G1	sib2	1962	5.5264	-0.203548	2.2123	0.136915	0.903355	0	-0.623241	19.2022	1.17579e-05	0.000138249	-1	-0.574136	16.6607	4.46974e-05	0.000528525	-1
G1	_	SPAC23G3.04	SPAC23G3.04_G1	ies4	1366	4.78138	-0.451612	7.65572	0.00565925	0.32032	0	0.423203	7.40927	0.00648885	0.0285573	1	0.166558	1.14315	0.284988	0.493376	0
G1	_	SPAC23G3.05c	SPAC23G3.05c_G1		1604	4.54149	-0.283316	1.5081	0.219429	0.938676	0	-0.0593946	0.0659463	0.797333	0.885449	0	0.29904	1.73545	0.187716	0.377783	0
G1	_	SPAC23G3.06	SPAC23G3.06_G1	nop58	1960	8.7658	0.0524456	0.332453	0.564218	0.995634	0	-0.0930872	1.03698	0.308525	0.498074	0	-0.211078	5.3327	0.0209289	0.0830135	0
G1	_	SPAC23G3.07c	SPAC23G3.07c_G1	snf30	1249	5.55186	-0.0166079	0.0174311	0.894963	0.995634	0	0.505639	16.8463	4.0533e-05	0.000401295	1	0.341492	7.71109	0.00548826	0.0294982	1
G1	_	SPAC23G3.08c	SPAC23G3.08c_G1	ubp7	3572	7.07568	-0.0919177	0.729081	0.393181	0.991043	0	-0.0589636	0.295893	0.586469	0.745518	0	0.0497749	0.21522	0.642706	0.795544	0
G1	_	SPAC23G3.09	SPAC23G3.09_G1	taf4	1625	6.40005	0.0674671	0.555713	0.455993	0.995634	0	-0.0397162	0.184	0.667958	0.801381	0	-0.0192596	0.0446433	0.832661	0.910378	0
G1	_	SPAC23G3.10c	SPAC23G3.10c_G1	ssr3	3019	7.0318	-0.0181428	0.034412	0.852833	0.995634	0	-0.0396648	0.161157	0.688094	0.816693	0	-0.0969642	0.972043	0.324171	0.534486	0
G1	_	SPAC23G3.11	SPAC23G3.11_G1	rpn6	3046	8.28826	-0.0219688	0.036789	0.847895	0.995634	0	-0.225699	3.84122	0.0500071	0.138916	0	-0.171873	2.23252	0.135133	0.301991	0
G1	_	SPAC23G3.12c	SPAC23G3.12c_G1	htr12	3154	8.24277	0.0513265	0.317214	0.573287	0.995634	0	-0.084704	0.85289	0.355736	0.545886	0	-0.172109	3.52907	0.0603017	0.17709	0
G1	_	SPAC23H3.02c	SPAC23H3.02c_G1	ini1	836	6.64974	0.0869017	0.565859	0.451909	0.995634	0	0.271266	5.47906	0.0192456	0.0672308	0	0.374146	10.6188	0.00111945	0.00825365	1
G1	_	SPAC23H3.03c	SPAC23H3.03c_G1	npr2	1853	6.14503	0.0435671	0.164144	0.68537	0.995634	0	0.070902	0.424224	0.514837	0.689125	0	-0.0105315	0.00947712	0.922448	0.958871	0
G1	_	SPAC23H3.04	SPAC23H3.04_G1		1062	4.4648	0.113174	0.474119	0.491098	0.995634	0	-0.179932	1.10327	0.293551	0.480711	0	-0.0374136	0.0506468	0.821942	0.904814	0
G1	_	SPAC23H3.05c	SPAC23H3.05c_G1	swd1	1598	6.11535	0.156663	1.95195	0.162377	0.919597	0	0.215578	3.62958	0.0567612	0.152802	0	0.101856	0.819249	0.3654	0.574069	0
G1	_	SPAC23H3.06	SPAC23H3.06_G1	apl6	3197	6.59958	-0.0229953	0.0516315	0.820248	0.995634	0	0.0261484	0.0656024	0.797851	0.885449	0	0.0655521	0.421659	0.516111	0.699495	0
G1	_	SPAC23H3.07c	SPAC23H3.07c_G1	mrp2	1082	6.47886	0.0959993	0.802246	0.370423	0.991043	0	0.0636508	0.343685	0.55771	0.72259	0	0.0981798	0.835644	0.360645	0.568595	0
G1	_	SPAC23H3.08c	SPAC23H3.08c_G1	bub3	1464	5.22416	0.0523539	0.171227	0.679023	0.995634	0	0.205376	2.60585	0.10647	0.244056	0	0.180081	2.06524	0.150691	0.325536	0
G1	_	SPAC23H3.09c	SPAC23H3.09c_G1	gly1	1924	8.32846	0.0280884	0.0610487	0.804846	0.995634	0	-0.278543	5.91177	0.0150401	0.055489	0	-0.322528	7.95671	0.00479093	0.0264535	-1
G1	_	SPAC23H3.10	SPAC23H3.10_G1	ssr2	1799	6.69202	-0.0883912	0.687514	0.407011	0.992709	0	0.196319	3.40361	0.0650537	0.169659	0	0.0945506	0.794406	0.372771	0.580123	0
G1	_	SPAC23H3.11c	SPAC23H3.11c_G1		2037	6.07718	0.123101	0.87857	0.348594	0.983844	0	-0.432402	10.1579	0.00143684	0.00844717	-1	-0.150988	1.29562	0.255015	0.462169	0
G1	_	SPAC23H3.12c	SPAC23H3.12c_G1		935	3.85971	-0.133583	0.509346	0.475422	0.995634	0	-0.480612	5.90908	0.015063	0.0555294	0	-0.413883	4.64417	0.0311592	0.110826	0
G1	_	SPAC23H3.13c	SPAC23H3.13c_G1	gpa2	2778	6.66501	-0.259678	5.75349	0.0164559	0.495815	0	-0.100345	0.854982	0.355147	0.545266	0	-0.125499	1.35603	0.244227	0.450301	0
G1	_	SPBC354.10	SPBC354.10_G1	def1	3416	7.35227	-0.319609	7.61899	0.00577567	0.32032	0	-0.288879	6.17111	0.0129853	0.0493506	-1	-0.279455	5.83278	0.0157303	0.0663403	0
G1	_	SPAC23H3.14	SPAC23H3.14_G1	avl9	1760	6.45246	-0.0688295	0.527921	0.467482	0.995634	0	-0.160847	2.76952	0.0960752	0.226525	0	-0.15834	2.75899	0.0967091	0.242333	0
G1	_	SPAC23H3.15c	SPAC23H3.15c_G1	ddr48	1363	5.99154	-0.0316786	0.00560483	0.940322	0.995634	0	-0.89033	4.07658	0.0434816	0.124942	0	-0.711427	2.54168	0.110876	0.265519	0
G1	_	SPAC23H4.01c	SPAC23H4.01c_G1	osh3	3389	6.20138	-0.137627	1.45516	0.227702	0.947294	0	-0.110863	0.923293	0.336612	0.528552	0	0.0171268	0.0227586	0.880087	0.936598	0
G1	_	SPAC23H4.02	SPAC23H4.02_G1	ppk9	2006	5.70676	0.0227994	0.0332174	0.855381	0.995634	0	-0.038983	0.09407	0.759065	0.864135	0	0.0615301	0.242453	0.62244	0.782011	0
G1	_	SPAC23H4.03c	SPAC23H4.03c_G1	erv25	1078	7.72008	0.0383415	0.170697	0.679493	0.995634	0	-0.232752	6.11457	0.0134072	0.0505859	0	-0.192042	4.22126	0.0399206	0.132512	0
G1	_	SPAC23H4.04	SPAC23H4.04_G1	slm3	1463	6.33385	0.119467	1.20009	0.273304	0.962785	0	-0.0216452	0.0379845	0.845474	0.914348	0	-0.189019	2.90739	0.0881745	0.228626	0
G1	_	SPAC23H4.05c	SPAC23H4.05c_G1		1041	1.7566	-0.501629	2.31107	0.128455	0.889217	0	-0.631612	3.32696	0.0681527	0.175078	0	-0.587118	3.11361	0.0776405	0.209965	0
G1	_	SPAC23H4.06	SPAC23H4.06_G1	gln1	2077	5.89885	-0.531651	15.3403	8.97786e-05	0.0281321	-1	0.113707	0.734628	0.391387	0.581089	0	0.248281	3.59521	0.0579463	0.172333	0
G1	_	SPAC23H4.07c	SPAC23H4.07c_G1	srp102	834	6.89014	0.0366086	0.129602	0.718845	0.995634	0	-0.0367809	0.12766	0.720871	0.839276	0	-0.138186	1.81071	0.178424	0.36518	0
G1	_	SPAC23H4.08	SPAC23H4.08_G1	iwr1	1129	6.077	-0.064207	0.274972	0.600016	0.995634	0	0.378161	9.72332	0.00181945	0.0101808	1	0.305441	6.40333	0.0113907	0.0522204	0
G1	_	SPAC23H4.09	SPAC23H4.09_G1	cdb4	1322	8.85349	0.0109734	0.00932953	0.923052	0.995634	0	-0.303823	7.06649	0.0078539	0.0335289	-1	-0.241561	4.47719	0.0343503	0.119133	0
G1	_	SPAC23H4.10c	SPAC23H4.10c_G1	thi4	3506	7.02686	0.0291212	0.0858271	0.769551	0.995634	0	0.111653	1.24822	0.263894	0.448555	0	-0.040368	0.163529	0.685928	0.823823	0
G1	_	SPBC36B7.03	SPBC36B7.03_G1	sec63	2187	7.75108	-0.201557	5.4085	0.0200389	0.512588	0	-0.319566	13.301	0.000265262	0.00208582	-1	-0.320427	13.5406	0.000233456	0.00221677	-1
G1	_	SPAC23H4.11c	SPAC23H4.11c_G1	cnl2	1038	4.90838	-0.100733	0.426216	0.513852	0.995634	0	0.318345	4.37346	0.0365029	0.109472	0	0.180242	1.41146	0.234815	0.438903	0
G1	_	SPAC23H4.12	SPAC23H4.12_G1	alp13	1681	6.35912	-0.0439669	0.164393	0.685144	0.995634	0	-0.0501523	0.209009	0.647545	0.788606	0	-0.14994	1.88696	0.169546	0.352307	0
G1	_	SPAC23H4.13c	SPAC23H4.13c_G1		1483	5.81251	-0.00117295	0.000119335	0.991284	0.999311	0	0.0809474	0.556838	0.455537	0.637813	0	0.114345	1.15298	0.282927	0.491856	0
G1	_	SPAC23H4.14	SPAC23H4.14_G1	vam6	3025	6.56067	-0.0151733	0.0206001	0.885874	0.995634	0	0.0548453	0.265267	0.606524	0.760522	0	0.0656513	0.387359	0.533691	0.713126	0
G1	_	SPBC3B8.07c	SPBC3B8.07c_G1	dsd1	2351	6.53488	-0.26461	4.39683	0.0360059	0.611278	0	-0.418728	10.7153	0.00106252	0.00671251	-1	-0.481679	14.3237	0.000153914	0.00155077	-1
G1	_	SPAC23H4.15	SPAC23H4.15_G1	tsr1	2656	7.30179	-0.134549	2.10596	0.146726	0.907732	0	0.641064	49.8506	1.65909e-12	6.93168e-11	1	0.591256	42.8183	6.00662e-11	2.46036e-09	1
G1	_	SPAC23H4.16c	SPAC23H4.16c_G1	not11	1057	5.52793	0.0128491	0.00966755	0.921675	0.995634	0	0.0833947	0.399855	0.527164	0.698612	0	0.0408231	0.0976902	0.754619	0.867266	0
G1	_	SPAC23H4.17c	SPAC23H4.17c_G1	srb10	1252	5.17191	-0.0935578	0.327429	0.567177	0.995634	0	0.112474	0.470017	0.492979	0.671193	0	-0.00650273	0.00158906	0.968202	0.982187	0
G1	_	SPAC23H4.18c	SPAC23H4.18c_G1	rbx1	723	6.06005	0.250267	5.10922	0.0237991	0.549972	0	-0.108051	0.889991	0.34548	0.536054	0	-0.0326922	0.0843687	0.771462	0.875703	0
G1	_	SPAC23H4.21	SPAC23H4.21_G1		701	4.26127	0.0408699	0.0517298	0.82008	0.995634	0	-0.176463	0.89589	0.343886	0.534743	0	0.0197705	0.011996	0.912785	0.955298	0
G1	_	SPAC24B11.05	SPAC24B11.05_G1		1696	7.29772	-0.0261118	0.06821	0.793961	0.995634	0	-0.549434	28.728	8.32903e-08	1.55351e-06	-1	-0.531065	27.2641	1.77481e-07	3.65879e-06	-1
G1	_	SPAC24B11.06c	SPAC24B11.06c_G1	sty1	1569	6.10009	-0.429635	5.64881	0.0174672	0.507757	0	-0.229505	1.60642	0.204995	0.379753	0	-0.0365458	0.0414622	0.838648	0.914318	0
G1	_	SPAC24B11.07c	SPAC24B11.07c_G1		2437	5.90718	-0.0436562	0.13429	0.714025	0.995634	0	-0.0379831	0.099237	0.752747	0.860596	0	0.0257554	0.0470455	0.828286	0.908031	0
G1	_	SPBC3B9.03	SPBC3B9.03_G1	srp101	1824	7.09413	0.144891	2.32393	0.127398	0.889217	0	0.250621	6.89414	0.00864789	0.0359869	1	0.179915	3.58212	0.0584046	0.172963	0
G1	_	SPBC3B9.14c	SPBC3B9.14c_G1	mrpl3	1077	5.40893	0.137968	1.08285	0.29806	0.970858	0	0.330391	6.20656	0.0127278	0.0485484	1	0.159584	1.45114	0.228346	0.431835	0
G1	_	SPAC24B11.09	SPAC24B11.09_G1	mpc2	2870	5.96898	-0.0816205	0.3399	0.559887	0.995634	0	-0.622605	18.491	1.70705e-05	0.000192066	-1	-0.581559	16.519	4.81641e-05	0.000566262	-1
G1	_	SPAC24B11.10c	SPAC24B11.10c_G1	cfh1	3303	5.32714	-0.106661	0.666586	0.414245	0.993901	0	-0.0207378	0.024648	0.875247	0.93206	0	0.105459	0.66942	0.413254	0.616754	0
G1	_	SPAC24B11.11c	SPAC24B11.11c_G1	sid2	2298	6.71039	0.136311	1.72879	0.188566	0.920373	0	0.138975	1.76708	0.183744	0.352967	0	0.148729	2.05856	0.151353	0.326517	0
G1	_	SPAC24B11.12c	SPAC24B11.12c_G1	dnf2	5149	7.67855	-0.282678	4.30582	0.0379822	0.62634	0	-0.188249	1.9007	0.168	0.333238	0	-0.210971	2.39193	0.121963	0.282316	0
G1	_	SPAC24B11.13	SPAC24B11.13_G1	hem3	2178	6.16549	-0.229578	2.36523	0.124065	0.889217	0	-0.113234	0.571982	0.449472	0.632999	0	-0.009021	0.00369201	0.951549	0.972022	0
G1	_	SPAC24B11.14	SPAC24B11.14_G1		501	1.72615	0.120505	0.117103	0.732198	0.995634	0	0.296751	0.702415	0.401973	0.590799	0	-0.0594509	0.0274956	0.8683	0.930267	0
G1	_	SPAC24C9.02c	SPAC24C9.02c_G1	cyt2	798	6.1878	0.103574	0.624603	0.429342	0.995634	0	0.1894	2.05591	0.151617	0.309909	0	0.0826589	0.395263	0.529546	0.710482	0
G1	_	SPAC24C9.03	SPAC24C9.03_G1	mvd1	2233	7.22768	0.0251545	0.0761412	0.782597	0.995634	0	0.131201	2.05013	0.152193	0.310496	0	0.211333	5.42365	0.0198658	0.0799608	0
G1	_	SPAC24C9.04	SPAC24C9.04_G1		1188	6.56723	0.0180984	0.0283651	0.866253	0.995634	0	-0.115334	1.11436	0.291135	0.477889	0	-0.130128	1.44221	0.229782	0.433096	0
G1	_	SPAC24C9.05c	SPAC24C9.05c_G1	mug70	2327	6.17105	-0.0983936	0.678337	0.41016	0.993196	0	0.0172887	0.0207378	0.885496	0.938191	0	-0.150122	1.5638	0.21111	0.407712	0
G1	_	SPAC24C9.06c	SPAC24C9.06c_G1	aco1	2849	8.58276	0.0842957	0.64061	0.42349	0.995634	0	-0.0983766	0.864913	0.352368	0.54271	0	-0.100993	0.914444	0.338938	0.547032	0
G1	_	SPAC24C9.07c	SPAC24C9.07c_G1	bgs2	6069	6.40297	-0.0989438	0.726835	0.393911	0.991043	0	0.196637	2.88937	0.0891659	0.21509	0	0.253968	4.92245	0.0265099	0.0988324	0
G1	_	SPAC24C9.08	SPAC24C9.08_G1	cps1	2258	8.18476	0.0573686	0.12536	0.723292	0.995634	0	-0.246428	2.29912	0.129447	0.278396	0	-0.320983	3.88928	0.0485954	0.151516	0
G1	_	SPAC24C9.09	SPAC24C9.09_G1		2733	6.10435	0.151654	1.61093	0.204362	0.932066	0	0.0747981	0.381558	0.53677	0.70671	0	-0.0212309	0.0310016	0.860237	0.925975	0
G1	_	SPAC24C9.10c	SPAC24C9.10c_G1	mrp4	978	5.46169	-0.0551896	0.202071	0.653055	0.995634	0	-0.101824	0.660172	0.416499	0.60323	0	-0.113801	0.847712	0.357201	0.565346	0
G1	_	SPBC3B9.19	SPBC3B9.19_G1	mge1	1299	8.15417	0.183556	3.02359	0.0820617	0.79487	0	0.314957	8.86036	0.0029143	0.014995	1	0.105869	1.00152	0.316942	0.527563	0
G1	_	SPAC24C9.11	SPAC24C9.11_G1	sgd1	2556	6.66058	0.0753824	0.53712	0.463629	0.995634	0	0.502115	24.292	8.27825e-07	1.27783e-05	1	0.336018	10.9079	0.000957553	0.00724432	1
G1	_	SPBC3D6.06c	SPBC3D6.06c_G1	prs5	1292	7.3738	0.173337	3.32453	0.0682537	0.762553	0	0.354455	13.8377	0.0001993	0.00162632	1	0.337075	12.6359	0.0003784	0.00334476	1
G1	_	SPAC24C9.13c	SPAC24C9.13c_G1	mrp10	488	5.34886	0.0355783	0.0609017	0.805076	0.995634	0	-0.0400319	0.0743729	0.785073	0.878356	0	0.149069	1.07649	0.299484	0.507714	0
G1	_	SPAC24C9.14	SPAC24C9.14_G1	otu1	4377	7.5738	0.0892561	0.762962	0.382403	0.991043	0	-0.468344	20.1979	6.98289e-06	8.68818e-05	-1	-0.576622	30.716	2.98686e-08	7.73498e-07	-1
G1	_	SPAC24C9.15c	SPAC24C9.15c_G1	spn5	1595	5.0187	0.149032	1.01504	0.313697	0.973112	0	0.858138	36.5843	1.46203e-09	3.86605e-08	1	0.963493	48.3011	3.6554e-12	1.77584e-10	1
G1	_	SPAC24C9.16c	SPAC24C9.16c_G1	cox8	325	5.66753	0.014442	0.00672468	0.934643	0.995634	0	0.273659	2.40641	0.120839	0.264512	0	0.0657814	0.139629	0.70865	0.840006	0
G1	_	SPAC24H6.01c	SPAC24H6.01c_G1	gup1	2067	6.21623	0.00450967	0.00197022	0.964596	0.995634	0	-0.0746044	0.5183	0.471568	0.651812	0	0.00988357	0.00944448	0.922581	0.958871	0
G1	_	SPAC24H6.02c	SPAC24H6.02c_G1	tim15	1100	5.26156	0.233731	2.67089	0.102199	0.845448	0	0.224421	2.38925	0.122172	0.2665	0	0.0342445	0.0558547	0.813172	0.900096	0
G1	_	SPAC24H6.03	SPAC24H6.03_G1	cul3	2791	5.70056	-0.243368	3.78319	0.0517697	0.686942	0	0.0321432	0.0664437	0.796587	0.885144	0	-0.0250048	0.0409575	0.83962	0.914318	0
G1	_	SPAC24H6.04	SPAC24H6.04_G1	hxk1	2802	8.99586	0.0163701	0.0200123	0.887503	0.995634	0	-0.193631	2.78057	0.0954142	0.225148	0	-0.211831	3.32774	0.0681206	0.192303	0
G1	_	SPAC24H6.05	SPAC24H6.05_G1	cdc25	3229	6.78153	-0.28869	6.35931	0.0116767	0.413434	0	0.270644	5.74243	0.0165599	0.059816	0	0.253886	5.11292	0.0237483	0.0911394	0
G1	_	SPBC3E7.05c	SPBC3E7.05c_G1	mic60	2108	7.20019	0.228974	4.13249	0.0420673	0.64145	0	0.378807	11.2736	0.000786166	0.00520264	1	0.200119	3.14583	0.0761213	0.206874	0
G1	_	SPAC24H6.06	SPAC24H6.06_G1	sld3	2282	5.19509	-0.11558	0.741013	0.389336	0.991043	0	0.0320593	0.0564142	0.812256	0.894624	0	0.0815274	0.379437	0.537905	0.715418	0
G1	_	SPAC24H6.07	SPAC24H6.07_G1	rps901	730	7.74325	-0.0180037	0.0305795	0.861182	0.995634	0	-0.0969165	0.87371	0.34993	0.540151	0	-0.0426224	0.170436	0.679725	0.820735	0
G1	_	SPAC24H6.08	SPAC24H6.08_G1		1250	4.82658	-0.024603	0.0283695	0.866243	0.995634	0	0.133874	0.830447	0.362143	0.552566	0	0.246171	2.965	0.0850844	0.223855	0
G1	_	SPAC24H6.09	SPAC24H6.09_G1	gef1	2958	6.4344	-0.0777335	0.549326	0.458593	0.995634	0	0.0142427	0.0181956	0.892698	0.942575	0	-0.021867	0.043586	0.834626	0.91184	0
G1	_	SPAC24H6.10c	SPAC24H6.10c_G1		1227	7.5783	0.163814	1.92823	0.164952	0.919597	0	-0.261126	4.78118	0.0287724	0.0920454	0	-0.221996	3.47657	0.0622437	0.180677	0
G1	_	SPAC24H6.11c	SPAC24H6.11c_G1		4462	6.46974	-0.0172255	0.0243416	0.876019	0.995634	0	-0.321733	8.08142	0.00447215	0.0212325	-1	-0.233904	4.39431	0.036059	0.123353	0
G1	_	SPAC24H6.12c	SPAC24H6.12c_G1	uba3	1914	7.08757	0.0610872	0.463723	0.495889	0.995634	0	-0.312696	11.5303	0.000684714	0.00462902	-1	-0.366705	16.072	6.09794e-05	0.000694833	-1
G1	_	SPBC3E7.11c	SPBC3E7.11c_G1		1392	6.94613	0.220402	4.32469	0.0375633	0.624318	0	0.291647	7.47351	0.00626135	0.02781	1	0.215817	4.13076	0.0421105	0.137094	0
G1	_	SPAC24H6.13	SPAC24H6.13_G1		3881	8.22741	0.10253	0.752653	0.385638	0.991043	0	0.258363	4.77449	0.0288844	0.0923092	0	0.0191563	0.0261954	0.871424	0.931312	0
G1	_	SPAC25A8.01c	SPAC25A8.01c_G1	fft3	3682	7.94478	-0.0806663	0.73194	0.392255	0.991043	0	-0.0499741	0.278408	0.597746	0.753586	0	0.0709544	0.56875	0.450756	0.647168	0
G1	_	SPAC25A8.02	SPAC25A8.02_G1	atg14	1914	6.31657	0.0858435	0.684236	0.408132	0.993196	0	-0.00273666	0.000672071	0.979318	0.99022	0	-0.121884	1.34521	0.246117	0.452321	0
G1	_	SPAC25A8.03c	SPAC25A8.03c_G1		1922	5.94324	0.0786085	0.401571	0.526279	0.995634	0	0.0383155	0.0929235	0.760493	0.865068	0	-0.14144	1.2702	0.25973	0.467334	0
G1	_	SPAC25B8.01	SPAC25B8.01_G1	dap1	856	6.26435	0.000794095	5.74255e-05	0.993954	0.999536	0	0.0622023	0.345404	0.556726	0.721913	0	0.0119224	0.012872	0.90967	0.953169	0
G1	_	SPAC25B8.02	SPAC25B8.02_G1	sds3	1255	4.68328	-0.144254	0.565962	0.451868	0.995634	0	0.44171	5.54311	0.0185536	0.06525	0	0.402112	4.6406	0.0312241	0.110931	0
G1	_	SPAC25B8.03	SPAC25B8.03_G1	psd2	2797	6.89978	-0.00124079	0.000126659	0.991021	0.999311	0	0.269634	6.01253	0.0142047	0.0530516	0	0.381992	12.2961	0.000453917	0.00391292	1
G1	_	SPAC25B8.04c	SPAC25B8.04c_G1	mss51	1731	3.98563	-0.0846147	0.220075	0.638982	0.995634	0	-0.254609	1.84	0.174951	0.341245	0	0.119255	0.452464	0.501167	0.689955	0
G1	_	SPAC25B8.05	SPAC25B8.05_G1	deg1	1931	5.54567	0.0185263	0.0214961	0.883436	0.995634	0	0.114665	0.810506	0.367971	0.557157	0	-0.0130281	0.0105273	0.918278	0.957425	0
G1	_	SPAC25B8.06c	SPAC25B8.06c_G1	dia4	3517	6.1423	0.0596946	0.223557	0.636343	0.995634	0	0.101003	0.630576	0.427144	0.612706	0	-0.121894	0.915078	0.338771	0.547032	0
G1	_	SPAC25B8.07c	SPAC25B8.07c_G1	rcf1	1729	6.32609	0.00766638	0.00472694	0.945186	0.995634	0	-0.234956	4.23406	0.0396206	0.11641	0	-0.211796	3.51263	0.0609027	0.178496	0
G1	_	SPAC25B8.08	SPAC25B8.08_G1		1978	6.3845	0.0979023	0.664151	0.415098	0.994427	0	0.253812	4.44235	0.0350579	0.106428	0	0.216078	3.24752	0.0715315	0.198709	0
G1	_	SPAC25B8.09	SPAC25B8.09_G1		1108	5.61673	0.0529046	0.162582	0.686791	0.995634	0	-0.148345	1.21259	0.270819	0.455508	0	-0.108257	0.664889	0.414839	0.618107	0
G1	_	SPAC25B8.10	SPAC25B8.10_G1		1425	7.88358	0.0716473	0.584833	0.444424	0.995634	0	-0.298359	9.84538	0.00170259	0.00965621	-1	-0.164484	3.04133	0.0811695	0.216464	0
G1	_	SPAC25B8.11	SPAC25B8.11_G1		2659	7.47062	-0.0249702	0.0594775	0.807324	0.995634	0	-0.0761087	0.543831	0.460849	0.642095	0	0.0168356	0.0270473	0.869368	0.930288	0
G1	_	SPAC25B8.12c	SPAC25B8.12c_G1		1884	8.2234	-0.187194	3.14704	0.076065	0.779265	0	0.00882016	0.00698929	0.933373	0.965047	0	0.168796	2.57977	0.108238	0.262104	0
G1	_	SPAC25B8.13c	SPAC25B8.13c_G1	isp7	3114	5.90031	-0.311894	7.76851	0.0053165	0.311388	0	-0.679444	33.8844	5.84872e-09	1.39369e-07	-1	-0.226966	4.15277	0.0415665	0.135959	0
G1	_	SPAC25B8.14	SPAC25B8.14_G1	mal2	2304	6.83537	-0.0124712	0.0181063	0.89296	0.995634	0	-0.0602719	0.41095	0.521488	0.693583	0	0.0306694	0.109651	0.740542	0.859281	0
G1	_	SPAC25B8.15c	SPAC25B8.15c_G1	tyw3	2165	5.29608	0.0718645	0.248578	0.618078	0.995634	0	0.599265	17.9709	2.24304e-05	0.000243139	1	0.547224	15.2372	9.48159e-05	0.00101748	1
G1	_	SPAC25B8.16	SPAC25B8.16_G1	pop100	2535	5.67164	-0.23549	4.0161	0.0450678	0.657301	0	0.102363	0.772246	0.379523	0.568629	0	0.17432	2.32899	0.126984	0.289625	0
G1	_	SPAC25B8.17	SPAC25B8.17_G1	ypf1	1194	6.39741	-0.0252734	0.0580162	0.809659	0.995634	0	0.0492641	0.216487	0.64173	0.785799	0	0.10405	0.991588	0.319355	0.529775	0
G1	_	SPAC25B8.18	SPAC25B8.18_G1		748	5.18252	-0.138538	0.945047	0.330983	0.979521	0	-0.180337	1.54153	0.21439	0.390826	0	-0.232926	2.63323	0.104649	0.256085	0
G1	_	SPAC25B8.19c	SPAC25B8.19c_G1	loz1	3159	5.56642	-0.433194	6.82809	0.00897353	0.374914	0	-0.369449	4.89963	0.0268625	0.0871819	0	-0.171118	1.08597	0.297366	0.505038	0
G1	_	SPAC25B8.20	SPAC25B8.20_G1	smp1	939	4.44781	0.316806	4.26547	0.0388944	0.62634	0	0.129186	0.656798	0.417692	0.604126	0	0.0916535	0.343357	0.557898	0.730994	0
G1	_	SPAC25G10.01	SPAC25G10.01_G1		2195	6.21463	0.223436	5.09541	0.0239893	0.549972	0	-0.139386	1.83745	0.17525	0.341496	0	-0.0680535	0.455486	0.499741	0.689082	0
G1	_	SPAC25G10.02	SPAC25G10.02_G1	cce1	1670	4.65172	-0.0788813	0.298449	0.584856	0.995634	0	0.0440814	0.0915426	0.762225	0.865845	0	0.022035	0.0238135	0.877361	0.935582	0
G1	_	SPAC25G10.03	SPAC25G10.03_G1	zip1	1583	7.88036	0.0288127	0.0445132	0.832902	0.995634	0	-0.0336021	0.059781	0.806842	0.890696	0	0.0682911	0.249762	0.617243	0.777384	0
G1	_	SPAC25G10.04c	SPAC25G10.04c_G1	rec10	2519	4.96733	0.0315655	0.0402617	0.84097	0.995634	0	0.726698	22.7586	1.83682e-06	2.59264e-05	1	0.335795	4.75243	0.029257	0.106169	0
G1	_	SPAC25G10.05c	SPAC25G10.05c_G1	his1	1297	8.34765	-0.0437406	0.142461	0.705846	0.995634	0	0.283532	5.97947	0.0144734	0.0537668	0	0.176906	2.33583	0.126428	0.289108	0
G1	_	SPAC25G10.06	SPAC25G10.06_G1	rps2801	302	9.70604	0.0720375	0.367252	0.544506	0.995634	0	-0.27454	5.28448	0.0215163	0.0734846	0	-0.139219	1.36616	0.242473	0.44824	0
G1	_	SPAC25G10.07c	SPAC25G10.07c_G1	cut7	3830	6.02979	-0.129381	1.21352	0.270636	0.958778	0	0.3404	8.63075	0.00330536	0.0165605	1	0.27457	5.70283	0.0169376	0.0702966	0
G1	_	SPBC3H7.18	SPBC3H7.18_G1	tam8	234	4.78388	0.19131	1.60744	0.204852	0.932066	0	0.382851	6.4034	0.0113902	0.0449843	1	0.310106	4.30009	0.0381104	0.127926	0
G1	_	SPAC25G10.08	SPAC25G10.08_G1	tif302	2527	9.87579	0.0270096	0.0906962	0.763294	0.995634	0	-0.15237	2.87062	0.0902099	0.216133	0	-0.286227	10.1212	0.00146576	0.0103329	-1
G1	_	SPAC25G10.09c	SPAC25G10.09c_G1	pan1	5591	6.5133	-0.59121	10.1287	0.00145979	0.170285	0	-0.203487	1.22567	0.268251	0.453603	0	-0.0862675	0.221714	0.637737	0.791895	0
G1	_	SPAC25H1.02	SPAC25H1.02_G1	jmj1	1733	4.96494	-0.161964	0.756389	0.384461	0.991043	0	-0.00488285	0.000685899	0.979106	0.99022	0	0.0456771	0.0609395	0.805017	0.896834	0
G1	_	SPAC25H1.03	SPAC25H1.03_G1	atg101	563	4.9766	0.147258	0.960408	0.327084	0.978887	0	0.272213	3.24492	0.0716453	0.182077	0	0.00473557	0.000977402	0.975059	0.985596	0
G1	_	SPAC25H1.04	SPAC25H1.04_G1	mug105	817	5.69826	0.116265	0.807887	0.368746	0.991043	0	0.00962857	0.00533907	0.941751	0.968645	0	-0.0249566	0.0366214	0.848238	0.918277	0
G1	_	SPAC25H1.05	SPAC25H1.05_G1	meu29	1106	5.813	-0.0907967	0.618656	0.431547	0.995634	0	-0.457245	14.5659	0.000135339	0.00116828	-1	-0.556401	21.8762	2.90811e-06	4.61396e-05	-1
G1	_	SPAC25H1.06	SPAC25H1.06_G1	pcf3	1653	6.34977	0.0590411	0.416647	0.518615	0.995634	0	0.177968	3.73077	0.0534188	0.145778	0	0.0568505	0.385725	0.534555	0.713385	0
G1	_	SPAC25H1.07	SPAC25H1.07_G1	emc1	2947	8.86177	-0.0232734	0.060239	0.806119	0.995634	0	-0.293931	9.47951	0.00207779	0.0114024	-1	-0.232617	5.97915	0.014476	0.0622657	0
G1	_	SPAC25H1.08c	SPAC25H1.08c_G1	sqt1	1325	6.76715	0.109493	0.892307	0.344853	0.983844	0	0.284258	5.99767	0.0143248	0.0533731	0	0.0930888	0.641234	0.423264	0.625427	0
G1	_	SPBC530.15c	SPBC530.15c_G1		3952	7.45444	-0.0772938	0.527747	0.467556	0.995634	0	-0.295964	7.55304	0.00599089	0.0267795	-1	-0.176194	2.72235	0.0989521	0.246574	0
G1	_	SPAC25H1.09	SPAC25H1.09_G1	mde5	1980	2.27139	-0.0312033	0.00901778	0.924345	0.995634	0	0.659169	4.4755	0.0343841	0.104859	0	0.138881	0.188289	0.664345	0.809702	0
G1	_	SPAC25H1.10c	SPAC25H1.10c_G1	atp19	419	6.67226	0.161422	2.55522	0.10993	0.862289	0	0.180849	3.14743	0.0760466	0.190836	0	0.118336	1.36579	0.242537	0.44824	0
G1	_	SPAC26A3.01	SPAC26A3.01_G1	sxa1	2174	8.03551	-0.115015	1.06905	0.30116	0.970858	0	-0.654174	33.5268	7.02879e-09	1.61947e-07	-1	-0.562887	25.109	5.41781e-07	1.00752e-05	-1
G1	_	SPAC26A3.02	SPAC26A3.02_G1	myh1	2749	7.0364	0.0417701	0.167661	0.682199	0.995634	0	0.285323	7.8288	0.00514201	0.0237647	1	0.102628	1.01352	0.314062	0.524022	0
G1	_	SPAC26A3.03c	SPAC26A3.03c_G1	rmi1	3261	5.21003	0.028056	0.0385102	0.844422	0.995634	0	0.443655	9.90133	0.00165159	0.00940102	1	0.546494	15.592	7.85843e-05	0.000868585	1
G1	_	SPAC26A3.04	SPAC26A3.04_G1	rpl2002	731	8.56208	0.150425	2.00599	0.156679	0.919597	0	0.12095	1.28889	0.256253	0.439621	0	0.123771	1.35343	0.24468	0.450984	0
G1	_	SPBC543.02c	SPBC543.02c_G1		1993	5.92882	-0.282613	4.32423	0.0375734	0.624318	0	-0.386846	7.87035	0.00502519	0.0233325	-1	-0.276796	4.14319	0.0418024	0.136397	0
G1	_	SPAC26A3.06	SPAC26A3.06_G1	bud23	919	6.50332	0.0130352	0.00781985	0.929535	0.995634	0	1.09384	56.9694	4.42638e-14	2.31168e-12	1	0.949801	42.9993	5.47606e-11	2.27274e-09	1
G1	_	SPAC26A3.07c	SPAC26A3.07c_G1	rpl1101	870	7.46397	0.0994193	0.796661	0.372094	0.991043	0	0.00699624	0.00388747	0.950284	0.973856	0	0.0276035	0.0609553	0.804992	0.896834	0
G1	_	SPAC26A3.08	SPAC26A3.08_G1	smb1	1176	5.9235	-0.0157626	0.0156986	0.900291	0.995634	0	-0.310122	5.76479	0.0163505	0.059196	0	-0.206631	2.6406	0.104164	0.25548	0
G1	_	SPAC26A3.09c	SPAC26A3.09c_G1	rga2	4294	6.58969	-0.177805	3.35604	0.0669589	0.759235	0	0.207505	4.65735	0.0309209	0.0969876	0	0.27788	8.60317	0.00335579	0.0200866	1
G1	_	SPAC26A3.10	SPAC26A3.10_G1	cnt6	3622	7.80471	0.0253848	0.0774662	0.780761	0.995634	0	-0.196326	4.5244	0.0334148	0.102702	0	-0.126143	1.89443	0.168703	0.351484	0
G1	_	SPAC26A3.11	SPAC26A3.11_G1		1479	7.47109	-0.00228244	0.000470547	0.982694	0.9991	0	0.194179	3.39606	0.0653523	0.170014	0	0.270382	6.65822	0.00986996	0.0466703	1
G1	_	SPAC26A3.12c	SPAC26A3.12c_G1	dhp1	4940	7.12952	0.0774078	0.51012	0.475087	0.995634	0	-0.0360068	0.108163	0.742245	0.85377	0	0.0160461	0.021751	0.882751	0.93764	0
G1	_	SPAC26A3.14c	SPAC26A3.14c_G1		797	4.95566	-0.228553	1.39703	0.237222	0.947728	0	0.00567845	0.000870082	0.976468	0.988624	0	0.034011	0.0314589	0.85922	0.92553	0
G1	_	SPBC577.12	SPBC577.12_G1	dph6	2274	6.64768	0.172098	2.79547	0.0945312	0.819925	0	0.261082	6.36218	0.0116578	0.0456053	1	0.222261	4.66992	0.0306953	0.109924	0
G1	_	SPAC26A3.16	SPAC26A3.16_G1	dsk2	1676	7.18955	-0.0776834	0.507656	0.476155	0.995634	0	-0.386725	12.1898	0.000480508	0.00343761	-1	-0.228016	4.31488	0.0377804	0.127055	0
G1	_	SPAC26A3.17c	SPAC26A3.17c_G1	rmt2	1325	6.94016	0.152783	2.51718	0.112612	0.863315	0	0.398502	17.1479	3.45795e-05	0.000350097	1	0.525259	30.4689	3.39253e-08	8.53856e-07	1
G1	_	SPAC26F1.01	SPAC26F1.01_G1	sec74	3418	6.34734	-0.0770712	0.511904	0.474316	0.995634	0	0.225375	4.41347	0.0356563	0.107691	0	0.402552	14.6242	0.000131217	0.0013503	1
G1	_	SPBC660.12c	SPBC660.12c_G1	egt2	3161	6.84636	0.103734	1.42401	0.232744	0.947728	0	0.260259	8.89515	0.00285929	0.0148338	1	0.290767	11.3745	0.000744595	0.0059068	1
G1	_	SPAC26F1.02	SPAC26F1.02_G1	pnn1	1333	5.71223	0.168055	1.76595	0.183884	0.919597	0	-0.105539	0.658609	0.417052	0.603478	0	-0.222064	2.93869	0.0864808	0.226294	0
G1	_	SPAC26F1.03	SPAC26F1.03_G1	pda1	1657	7.95276	-0.00648701	0.00405577	0.949221	0.995634	0	-0.149021	2.10766	0.146563	0.303181	0	-0.0713333	0.487439	0.485072	0.676295	0
G1	_	SPAC26F1.04c	SPAC26F1.04c_G1	etr1	1929	8.52811	0.0586295	0.172604	0.677808	0.995634	0	-0.872709	37.2765	1.02513e-09	2.76918e-08	-1	-1.14151	63.2384	1.83145e-15	1.53036e-13	-1
G1	_	SPAC26F1.05	SPAC26F1.05_G1	mug106	1195	1.88914	0.022137	0.00575458	0.939531	0.995634	0	-1.06923	9.06961	0.00259893	0.0137563	-1	-0.439376	2.02478	0.154751	0.331876	0
G1	_	SPAC26F1.06	SPAC26F1.06_G1	gpm1	781	9.82264	0.00810688	0.00390047	0.950202	0.995634	0	0.0710808	0.298745	0.58467	0.744287	0	0.17068	1.72736	0.188749	0.379374	0
G1	_	SPAC26F1.07	SPAC26F1.07_G1		1324	8.78609	0.0289411	0.0543434	0.815671	0.995634	0	-0.56312	20.3052	6.60201e-06	8.27496e-05	-1	-0.46637	14.002	0.000182617	0.00179792	-1
G1	_	SPAC26F1.08c	SPAC26F1.08c_G1		3448	6.15495	0.0331767	0.0957862	0.756946	0.995634	0	0.219974	4.19372	0.040574	0.118489	0	0.140869	1.74451	0.186568	0.376562	0
G1	_	SPAC26F1.09	SPAC26F1.09_G1	gyp51	3458	6.27593	-0.101634	0.786172	0.37526	0.991043	0	-0.0701396	0.367332	0.544462	0.711714	0	-0.090447	0.623605	0.429711	0.630895	0
G1	_	SPBC6B1.05c	SPBC6B1.05c_G1	atg7	2220	6.07318	0.167385	2.29254	0.129997	0.889217	0	0.340505	9.41927	0.00214718	0.0117318	1	0.305542	7.7236	0.00545035	0.0293196	1
G1	_	SPAC26F1.10c	SPAC26F1.10c_G1	pyp1	1887	6.26573	-0.259337	3.78411	0.0517414	0.686942	0	-0.304308	5.10811	0.0238143	0.0798097	0	-0.212894	2.5513	0.110203	0.264772	0
G1	_	SPAC26F1.11	SPAC26F1.11_G1		1879	3.35782	-0.339645	1.9797	0.159422	0.919597	0	-0.414258	2.79484	0.0945682	0.223814	0	-0.358126	2.18593	0.139277	0.308755	0
G1	_	SPAC26F1.12c	SPAC26F1.12c_G1	hgh1	1315	5.76372	-0.00948668	0.00591641	0.938689	0.995634	0	0.529143	19.1651	1.19888e-05	0.0001407	1	0.407016	11.441	0.000718395	0.00571633	1
G1	_	SPAC26F1.13c	SPAC26F1.13c_G1	lrs1	3713	8.33856	-0.221012	3.65846	0.0557851	0.705098	0	-0.529435	20.6676	5.46336e-06	6.9733e-05	-1	-0.545782	22.045	2.66326e-06	4.26871e-05	-1
G1	_	SPAC26F1.14c	SPAC26F1.14c_G1	aif1	2231	3.46724	-0.0224049	0.00475197	0.945042	0.995634	0	-0.248104	0.560202	0.454179	0.636832	0	-0.205829	0.394086	0.530159	0.710846	0
G1	_	SPAC26H5.02c	SPAC26H5.02c_G1	mgs1	1945	5.29606	-0.00090745	4.32528e-05	0.994753	0.999538	0	0.373245	7.47367	0.00626078	0.02781	1	0.216006	2.52321	0.112182	0.266755	0
G1	_	SPAC26H5.03	SPAC26H5.03_G1	pcf2	2243	5.06625	0.0381397	0.0666439	0.796287	0.995634	0	0.24802	2.81522	0.093374	0.222078	0	0.145635	0.982826	0.321502	0.53168	0
G1	_	SPAC26H5.04	SPAC26H5.04_G1	gid5	2862	7.11203	-0.0917684	0.933422	0.333975	0.982605	0	0.0292256	0.0939225	0.759248	0.864186	0	-0.10039	1.1155	0.29089	0.498635	0
G1	_	SPAC26H5.05	SPAC26H5.05_G1	mga2	3806	7.76537	-0.0521454	0.263745	0.607559	0.995634	0	-0.226828	4.89982	0.0268595	0.0871819	0	-0.1536	2.27234	0.131701	0.296578	0
G1	_	SPAC26H5.06	SPAC26H5.06_G1	pot1	3088	6.49507	0.0904339	0.619877	0.431093	0.995634	0	0.209232	3.2982	0.0693558	0.177627	0	0.236505	4.28025	0.0385576	0.128738	0
G1	_	SPBC800.04c	SPBC800.04c_G1	rpl4301	420	8.57486	0.19532	2.37985	0.122909	0.889217	0	0.324046	6.51655	0.0106875	0.0427675	1	0.267177	4.44669	0.0349689	0.12059	0
G1	_	SPAC26H5.07c	SPAC26H5.07c_G1		1713	7.62096	-0.0521456	0.217329	0.641083	0.995634	0	-0.222679	3.89593	0.0484032	0.1353	0	-0.146708	1.70842	0.191191	0.382809	0
G1	_	SPAC26H5.08c	SPAC26H5.08c_G1	bgl2	1654	6.3911	-0.106089	0.35755	0.54987	0.995634	0	-0.315167	3.09845	0.0783671	0.195357	0	-0.54775	9.2467	0.0023592	0.0151013	-1
G1	_	SPAC26H5.09c	SPAC26H5.09c_G1		1554	5.73655	-0.773301	11.8857	0.000565678	0.0958137	0	-0.453928	4.08203	0.0433415	0.124654	0	-0.458818	4.21692	0.0400227	0.132613	0
G1	_	SPAC26H5.10c	SPAC26H5.10c_G1	tif51	1049	9.96196	0.201881	4.40769	0.0357773	0.611278	0	0.449647	21.8012	3.02404e-06	4.06613e-05	1	0.414245	18.5274	1.67481e-05	0.000219123	1
G1	_	SPBC83.16c	SPBC83.16c_G1		2813	7.50551	-0.0721427	0.562547	0.453236	0.995634	0	-0.308602	10.0068	0.00155961	0.00895882	-1	-0.243369	6.33096	0.0118648	0.053726	0
G1	_	SPAC26H5.11	SPAC26H5.11_G1	mug56	4393	6.93412	-0.193027	4.31225	0.0378388	0.625688	0	-0.0286205	0.0942558	0.758835	0.864135	0	-0.127617	1.89084	0.169108	0.352092	0
G1	_	SPAC26H5.12	SPAC26H5.12_G1	rpo41	3867	6.65527	-0.0396622	0.136161	0.712127	0.995634	0	-0.229128	4.3918	0.0361121	0.108753	0	-0.301541	7.67957	0.00558494	0.0298133	-1
G1	_	SPBC839.05c	SPBC839.05c_G1	rps1701	651	10.1938	0.0914549	0.970732	0.324498	0.978335	0	0.255345	7.55334	0.00598989	0.0267795	1	0.277518	8.93441	0.00279848	0.0172789	1
G1	_	SPAC26H5.13c	SPAC26H5.13c_G1	kei1	2935	5.49187	-0.236882	3.18445	0.074342	0.778895	0	0.294318	5.12332	0.0236064	0.0793405	0	0.207618	2.58337	0.107991	0.261811	0
G1	_	SPAC27D7.02c	SPAC27D7.02c_G1	grp1	2754	6.34712	-0.0364747	0.0983979	0.753761	0.995634	0	0.221483	3.63048	0.0567303	0.152784	0	0.30261	6.93803	0.00843822	0.0415415	1
G1	_	SPBC887.03c	SPBC887.03c_G1	noc3	2631	7.4548	0.0274554	0.084142	0.771761	0.995634	0	0.276079	8.51435	0.00352356	0.0174977	1	0.189868	4.04278	0.0443606	0.142555	0
G1	_	SPAC27D7.03c	SPAC27D7.03c_G1	mei2	4033	6.84663	-0.212583	0.429411	0.512278	0.995634	0	-0.637539	3.81157	0.0508998	0.140462	0	-0.674929	4.09183	0.043091	0.139706	0
G1	_	SPBC8D2.10c	SPBC8D2.10c_G1	rmt3	3070	7.71388	0.156483	2.43848	0.118391	0.877018	0	0.284521	8.01449	0.00464045	0.0218824	1	0.147369	2.15516	0.142092	0.312845	0
G1	_	SPAC27D7.04	SPAC27D7.04_G1	omt2	1407	5.47411	-0.0366128	0.0835636	0.772525	0.995634	0	0.234569	3.44969	0.0632636	0.166306	0	0.0530732	0.17731	0.673695	0.816802	0
G1	_	SPAC27D7.05c	SPAC27D7.05c_G1	apc14	753	4.64536	-0.113538	0.526715	0.467991	0.995634	0	0.135368	0.752095	0.385814	0.575552	0	0.218233	2.05342	0.151865	0.327221	0
G1	_	SPAC27D7.06	SPAC27D7.06_G1	etf1	1131	6.99715	0.0603506	0.415691	0.519095	0.995634	0	-0.229985	5.77058	0.0162966	0.0590693	0	-0.201589	4.52459	0.0334111	0.116806	0
G1	_	SPAC27D7.07c	SPAC27D7.07c_G1	smd1	778	6.64505	0.00414492	0.00169549	0.967155	0.99641	0	-0.0894126	0.763687	0.382177	0.571447	0	-0.0541114	0.286592	0.592413	0.756262	0
G1	_	SPBC8D2.20c	SPBC8D2.20c_G1	sec31	6332	8.34377	-0.365535	8.59604	0.00336895	0.266804	0	-0.345797	7.67326	0.0056045	0.0254517	-1	-0.312452	6.28886	0.0121499	0.0547795	0
G1	_	SPAC27D7.09c	SPAC27D7.09c_G1		1434	8.39995	-0.207539	2.82145	0.0930123	0.818454	0	-0.258604	4.34326	0.0371558	0.110884	0	-0.0835837	0.458371	0.498386	0.687971	0
G1	_	SPAC27D7.11c	SPAC27D7.11c_G1		1643	5.9175	-0.390463	5.49898	0.0190276	0.512588	0	-0.921144	28.8119	7.97606e-08	1.50227e-06	-1	-0.918974	29.2673	6.30495e-08	1.46897e-06	-1
G1	_	SPAC27D7.12c	SPAC27D7.12c_G1	but1	1060	3.33635	-0.675453	9.69583	0.00184686	0.209346	0	0.0121382	0.00346288	0.953075	0.975648	0	-0.473851	4.98846	0.0255169	0.0960448	0
G1	_	SPAC27D7.13c	SPAC27D7.13c_G1	ssm4	2013	4.94125	-0.0538022	0.0833033	0.77287	0.995634	0	0.757017	17.5389	2.81484e-05	0.000296291	1	0.661976	13.4171	0.000249337	0.00234977	1
G1	_	SPAC27D7.14c	SPAC27D7.14c_G1	tpr1	3324	7.82567	-0.0142477	0.0165827	0.897536	0.995634	0	-0.17462	2.46222	0.116614	0.258127	0	-0.205966	3.44279	0.0635282	0.183049	0
G1	_	SPAC27E2.01	SPAC27E2.01_G1		2137	5.35567	0.254791	4.45933	0.0347112	0.611278	0	0.232176	3.55605	0.0593289	0.158219	0	0.0996657	0.664626	0.414932	0.618107	0
G1	_	SPAC27E2.02	SPAC27E2.02_G1	yih1	1413	5.38305	-0.0146751	0.00994045	0.920581	0.995634	0	0.342461	5.51536	0.0188502	0.0661076	0	0.217293	2.23181	0.135196	0.301991	0
G1	_	SPAC27E2.03c	SPAC27E2.03c_G1		1563	7.58685	-0.0591764	0.320627	0.571231	0.995634	0	-0.19877	3.5601	0.0591841	0.157967	0	-0.335769	10.1601	0.00143509	0.0101739	-1
G1	_	SPAC27E2.04c	SPAC27E2.04c_G1	mug155	839	2.80754	0.142132	0.320041	0.571583	0.995634	0	-0.0510818	0.0375684	0.846312	0.914735	0	0.131623	0.27309	0.601266	0.763708	0
G1	_	SPAC27E2.05	SPAC27E2.05_G1	cdc1	1459	5.48427	-0.0208377	0.0223446	0.881174	0.995634	0	0.202463	2.10694	0.146632	0.303181	0	0.0522957	0.141433	0.70686	0.838718	0
G1	_	SPAC27E2.06c	SPAC27E2.06c_G1	msm1	2317	6.25621	0.043454	0.176168	0.674688	0.995634	0	-0.0552063	0.273968	0.600682	0.75607	0	-0.109681	1.1025	0.293719	0.500901	0
G1	_	SPAC27E2.07	SPAC27E2.07_G1	pvg2	2182	5.66617	0.139507	1.00562	0.315953	0.973112	0	0.134569	0.914622	0.338891	0.531206	0	0.18454	1.75305	0.185493	0.374875	0
G1	_	SPAC27E2.09	SPAC27E2.09_G1	mak2	7336	8.58871	-0.0132903	0.0177238	0.89409	0.995634	0	0.102677	1.05466	0.304436	0.493206	0	0.1326	1.76833	0.183589	0.372279	0
G1	_	SPAC27E2.10c	SPAC27E2.10c_G1	rfc3	1309	5.19351	0.0837828	0.268376	0.604423	0.995634	0	-0.334695	4.01749	0.0450306	0.128159	0	-0.445104	7.13419	0.00756279	0.0381303	-1
G1	_	SPAC27E2.14	SPAC27E2.14_G1		423	4.34511	0.29273	2.90125	0.0885111	0.80719	0	-0.0412307	0.0526195	0.818566	0.898101	0	-0.120258	0.459441	0.497885	0.687885	0
G1	_	SPAC27F1.02c	SPAC27F1.02c_G1	cdc8	980	9.45328	0.0012021	0.000118354	0.99132	0.999311	0	-0.134604	1.47548	0.224484	0.403361	0	-0.0886504	0.641914	0.423018	0.625328	0
G1	_	SPAC27F1.03c	SPAC27F1.03c_G1	uch1	864	5.67769	0.143174	0.730247	0.392803	0.991043	0	0.26873	2.56552	0.109217	0.249043	0	0.349213	4.39016	0.036147	0.123384	0
G1	_	SPAC27F1.04c	SPAC27F1.04c_G1	nuf2	1735	5.62593	0.0799665	0.350041	0.55409	0.995634	0	0.498223	13.8921	0.000193611	0.00158402	1	0.347681	6.78171	0.00920964	0.044126	1
G1	_	SPAC27F1.05c	SPAC27F1.05c_G1		2210	4.80394	0.254644	3.0378	0.0813459	0.793752	0	0.0569027	0.142097	0.706206	0.828645	0	-0.0270879	0.0329552	0.855947	0.923764	0
G1	_	SPAC27F1.06c	SPAC27F1.06c_G1	ani2	1305	6.479	0.266538	5.5753	0.0182156	0.507757	0	0.829932	55.6562	8.63214e-14	4.25966e-12	1	0.523707	21.9412	2.81131e-06	4.48307e-05	1
G1	_	SPBC947.01	SPBC947.01_G1	knk1	2678	5.9615	-0.248903	4.67685	0.0305717	0.600122	0	-0.378542	10.382	0.00127251	0.00772755	-1	-0.315053	7.46028	0.00630752	0.0328044	-1
G1	_	SPAC27F1.07	SPAC27F1.07_G1	ost1	1772	8.06867	0.0801655	0.512811	0.473924	0.995634	0	-0.335692	8.80669	0.00300128	0.0153699	-1	-0.309123	7.51071	0.00613331	0.0320492	-1
G1	_	SPBP23A10.05	SPBP23A10.05_G1	ssr4	2013	6.44597	0.0879486	0.855321	0.355051	0.983969	0	0.274016	8.26052	0.00405166	0.0196	1	0.211065	4.98674	0.0255423	0.0960826	0
G1	_	SPAC27F1.08	SPAC27F1.08_G1	pdt1	2174	6.16084	-0.28615	7.06355	0.00786679	0.359949	0	-0.138421	1.63548	0.200946	0.374399	0	-0.0492805	0.214997	0.642879	0.7956	0
G1	_	SPAC27F1.09c	SPAC27F1.09c_G1	prp10	3546	7.57384	-0.0555401	0.231519	0.6304	0.995634	0	-0.189624	2.66201	0.102771	0.238101	0	-0.282541	5.92516	0.0149262	0.0638079	0
G1	_	SPAC27F1.10	SPAC27F1.10_G1		952	2.23946	0.0783534	0.061569	0.804033	0.995634	0	-0.00137983	1.72557e-05	0.996686	0.998279	0	0.405979	1.77514	0.182748	0.370872	0
G1	_	SPAC29A4.02c	SPAC29A4.02c_G1		1478	8.62314	-0.0393456	0.163424	0.686024	0.995634	0	-0.380767	15.041	0.000105201	0.00092728	-1	-0.351997	12.9217	0.000324789	0.00294566	-1
G1	_	SPAC29A4.03c	SPAC29A4.03c_G1	mrps9	1402	6.93417	0.0221403	0.0377977	0.84585	0.995634	0	-0.199464	2.97648	0.0844827	0.207141	0	-0.222744	3.74446	0.0529828	0.161022	0
G1	_	SPBP23A10.14c	SPBP23A10.14c_G1	ell1	2389	5.91068	-0.168271	2.86785	0.0903654	0.814849	0	-0.347272	11.4317	0.00072203	0.00483436	-1	-0.295123	8.6336	0.00330019	0.0198296	-1
G1	_	SPBP35G2.14	SPBP35G2.14_G1	puf2	3757	7.86807	-0.180209	3.71207	0.0540204	0.695166	0	-0.305921	10.4966	0.00119592	0.00734067	-1	-0.0534348	0.328133	0.566761	0.737825	0
G1	_	SPAC29A4.04c	SPAC29A4.04c_G1	cbf5	1869	7.72516	-0.181732	2.54528	0.110624	0.862289	0	0.105345	0.857588	0.354415	0.544883	0	0.110788	0.954174	0.328659	0.538485	0
G1	_	SPAC29A4.05	SPAC29A4.05_G1	cam2	899	6.9628	-0.010212	0.0086653	0.925834	0.995634	0	-0.0732759	0.436899	0.508623	0.684315	0	0.0143367	0.0170582	0.896086	0.945735	0
G1	_	SPAC29A4.06c	SPAC29A4.06c_G1		1287	5.21975	-0.0924376	0.327195	0.567315	0.995634	0	0.447779	7.92983	0.00486265	0.022725	1	0.29687	3.48545	0.0619105	0.180113	0
G1	_	SPAC29A4.07	SPAC29A4.07_G1	srb6	2248	5.77132	-0.0227844	0.042506	0.836658	0.995634	0	0.147415	1.76686	0.183771	0.352967	0	0.0663283	0.364348	0.546101	0.722181	0
G1	_	SPAC29A4.08c	SPAC29A4.08c_G1	prp19	1614	7.84982	0.109383	1.3933	0.237849	0.947728	0	0.184534	3.93533	0.0472819	0.132622	0	0.184074	3.94714	0.0469512	0.147953	0
G1	_	SPAC29A4.09	SPAC29A4.09_G1	rrp17	1154	6.75886	0.118423	0.782985	0.37623	0.991043	0	0.292814	4.76435	0.0290551	0.0926534	0	0.284031	4.50019	0.033891	0.118063	0
G1	_	SPAC29A4.10	SPAC29A4.10_G1	rrn5	2666	6.56888	-0.198455	4.61291	0.0317322	0.603474	0	0.132507	2.08462	0.148789	0.306127	0	0.035105	0.148201	0.70026	0.834163	0
G1	_	SPAC29A4.11	SPAC29A4.11_G1	rga3	5802	6.98499	-0.299492	8.88504	0.00287517	0.243496	0	0.0534153	0.285541	0.593092	0.749831	0	0.112123	1.28366	0.257219	0.464284	0
G1	_	SPAC29A4.12c	SPAC29A4.12c_G1	mug108	1090	2.23475	-0.668061	3.29383	0.0695405	0.76856	0	0.0610687	0.0301866	0.862067	0.922571	0	0.333716	0.983939	0.321228	0.531451	0
G1	_	SPAC29A4.13	SPAC29A4.13_G1	ure6	1297	6.19152	0.138455	1.06743	0.301526	0.970858	0	0.127879	0.891269	0.345134	0.535915	0	0.179175	1.78699	0.181294	0.368858	0
G1	_	SPAC29A4.14c	SPAC29A4.14c_G1	pex3	2057	6.41844	0.0356471	0.151012	0.69757	0.995634	0	0.0299912	0.103582	0.747573	0.858008	0	0.0210821	0.0526194	0.818566	0.903861	0
G1	_	SPAC29A4.15	SPAC29A4.15_G1	srs1	1684	8.03139	0.00166827	0.000340786	0.985272	0.9991	0	-0.273451	8.94795	0.00277781	0.014483	-1	-0.247052	7.36512	0.00665011	0.034358	-1
G1	_	SPAC29A4.16	SPAC29A4.16_G1	hal4	2838	7.23139	-0.12574	1.5961	0.206457	0.932066	0	-0.0594441	0.353015	0.552411	0.718284	0	-0.126467	1.60838	0.204719	0.399805	0
G1	_	SPAC29A4.17c	SPAC29A4.17c_G1	fun14	1014	3.11071	-0.0780681	0.13829	0.709987	0.995634	0	-0.044146	0.0420317	0.837559	0.907972	0	-0.202545	0.903151	0.341938	0.550457	0
G1	_	SPAC29A4.18	SPAC29A4.18_G1	prw1	1538	6.87222	0.0379988	0.155951	0.692912	0.995634	0	0.113934	1.38313	0.239569	0.421736	0	0.0460018	0.228181	0.632876	0.788457	0
G1	_	SPAC29A4.19c	SPAC29A4.19c_G1	cta5	6325	6.53958	-0.115036	1.23825	0.265808	0.955054	0	-0.351083	11.0176	0.000902492	0.00585499	-1	-0.395931	14.2323	0.00016157	0.0016175	-1
G1	_	SPAC29A4.20	SPAC29A4.20_G1	elp3	2026	6.3103	-0.0952467	0.674312	0.411552	0.993772	0	0.134135	1.33963	0.247099	0.4298	0	0.175676	2.33912	0.126161	0.28898	0
G1	_	SPAC29B12.01	SPAC29B12.01_G1	ino80	5150	7.33053	-0.200559	3.0115	0.082676	0.79781	0	-0.0866152	0.558632	0.454812	0.637225	0	0.0130582	0.0128895	0.909609	0.953169	0
G1	_	SPAC29B12.02c	SPAC29B12.02c_G1	set2	2953	7.00378	-0.00123242	0.000175624	0.989426	0.999311	0	-0.256331	7.2854	0.00695171	0.0302755	-1	-0.206701	4.84684	0.0276968	0.101924	0
G1	_	SPAC29B12.03	SPAC29B12.03_G1	spd1	1403	5.74348	0.253149	4.39977	0.0359437	0.611278	0	-0.0212994	0.0293218	0.864038	0.924207	0	0.019212	0.0246848	0.875155	0.934344	0
G1	_	SPBP8B7.15c	SPBP8B7.15c_G1	mpe1	2716	6.91781	-0.346771	7.73908	0.00540382	0.313572	0	-0.330138	6.92863	0.00848267	0.0355116	-1	-0.288872	5.37513	0.0204258	0.0817946	0
G1	_	SPAC29B12.04	SPAC29B12.04_G1	snz1	1303	6.40214	0.081294	0.341646	0.558881	0.995634	0	-0.615929	18.5461	1.65843e-05	0.000187268	-1	-0.789357	30.3732	3.5641e-08	8.86359e-07	-1
G1	_	SPAC29B12.05c	SPAC29B12.05c_G1	mtq1	1212	3.75606	-0.0550641	0.092415	0.761129	0.995634	0	-0.169934	0.814575	0.366771	0.556551	0	-0.0521774	0.082963	0.773321	0.876701	0
G1	_	SPAC29B12.06c	SPAC29B12.06c_G1	rcd1	1608	6.83968	-0.175649	3.26187	0.0709081	0.770157	0	-0.085741	0.765207	0.381704	0.571052	0	-0.104016	1.1466	0.284261	0.492953	0
G1	_	SPAC29B12.07	SPAC29B12.07_G1	sec16	6534	7.80013	-0.345254	6.64648	0.00993518	0.39071	0	-0.0900878	0.454545	0.500185	0.678057	0	0.0700856	0.276998	0.598676	0.761652	0
G1	_	SPAC29B12.08	SPAC29B12.08_G1	clr5	3631	5.48939	-0.227795	2.59684	0.107077	0.85812	0	5.39313e-05	1.64222e-07	0.999677	0.999677	0	0.00951405	0.00464436	0.945667	0.970443	0
G1	_	SPAC29B12.10c	SPAC29B12.10c_G1	pgt1	3334	8.30556	0.178719	1.52527	0.216823	0.93519	0	-0.564785	14.9272	0.000111742	0.000978054	-1	-0.590167	16.3255	5.33402e-05	0.000619043	-1
G1	_	SPBPB7E8.01	SPBPB7E8.01_G1		4959	7.97091	-0.418727	8.02011	0.00462607	0.304301	0	-0.433792	8.55571	0.0034444	0.0171707	-1	-0.22031	2.2316	0.135214	0.301991	0
G1	_	SPAC29B12.11c	SPAC29B12.11c_G1		1424	6.46685	0.200958	3.9506	0.0468546	0.659382	0	-0.00919888	0.00790182	0.929168	0.963132	0	-0.10136	0.97069	0.324508	0.53476	0
G1	_	SPAC29B12.12	SPAC29B12.12_G1	hot13	342	2.67385	-0.0120458	0.00219773	0.962609	0.995634	0	0.27741	1.18409	0.276525	0.461513	0	0.383521	2.47843	0.115417	0.271007	0
G1	_	SPAC29B12.13	SPAC29B12.13_G1		507	5.50129	-0.0508845	0.10979	0.740384	0.995634	0	-0.831083	26.6281	2.46634e-07	4.2116e-06	-1	-0.895362	31.5146	1.97947e-08	5.23432e-07	-1
G1	_	SPAC29B12.14c	SPAC29B12.14c_G1		2906	5.89261	-0.133812	0.956911	0.327966	0.978887	0	-0.215707	2.4133	0.120309	0.263635	0	-0.0291675	0.045629	0.830852	0.909352	0
G1	_	SPAC29E6.01	SPAC29E6.01_G1	pof11	2010	6.07067	0.111083	0.756826	0.384324	0.991043	0	-0.0915057	0.495407	0.481525	0.660971	0	-0.236495	3.31535	0.0686357	0.193067	0
G1	_	SPAC29E6.02	SPAC29E6.02_G1	prp3	5537	6.53315	-0.0978966	0.668412	0.413606	0.993772	0	0.237968	3.98586	0.0458837	0.130056	0	0.217014	3.36217	0.06671	0.189603	0
G1	_	SPAC29E6.03c	SPAC29E6.03c_G1	uso1	3204	7.47907	-0.103698	0.959633	0.327279	0.978887	0	-0.198868	3.47336	0.0623644	0.164494	0	-0.316811	8.84944	0.00293179	0.0179593	-1
G1	_	SPAC29E6.04	SPAC29E6.04_G1	nnf1	618	5.23465	-0.167391	1.36121	0.243328	0.947728	0	-0.0747342	0.266454	0.60572	0.760152	0	-0.231641	2.5816	0.108113	0.262004	0
G1	_	SPAC29E6.05c	SPAC29E6.05c_G1	mxr1	1604	5.14841	0.00676358	0.00247476	0.960324	0.995634	0	0.107752	0.616753	0.432257	0.617712	0	0.154208	1.31199	0.252034	0.459023	0
G1	_	SPAC29E6.06c	SPAC29E6.06c_G1		2433	7.57949	-0.135741	2.14739	0.142812	0.907732	0	-0.358284	14.5523	0.000136322	0.00117192	-1	-0.505166	28.9564	7.40253e-08	1.69933e-06	-1
G1	_	SPAC29E6.07	SPAC29E6.07_G1		351	2.80539	-0.278258	1.40481	0.23592	0.947728	0	-0.0659377	0.0789133	0.778776	0.874401	0	-0.239963	1.05506	0.304344	0.512403	0
G1	_	SPAC29E6.08	SPAC29E6.08_G1	tbp1	1301	8.91612	0.0668692	0.45114	0.501794	0.995634	0	-0.336682	11.2527	0.000795075	0.0052543	-1	-0.185131	3.43846	0.0636952	0.183361	0
G1	_	SPAC29E6.09	SPAC29E6.09_G1		1317	5.8479	0.0678283	0.247455	0.618873	0.995634	0	0.236629	2.9978	0.0833777	0.204993	0	0.303244	5.01688	0.0251014	0.09512	0
G1	_	SPAC29E6.10c	SPAC29E6.10c_G1	nst1	3705	7.00184	-0.103486	1.1028	0.293652	0.970725	0	0.0986691	1.00159	0.316926	0.507713	0	0.0215155	0.0480923	0.826417	0.907191	0
G1	_	SPAC2C4.03c	SPAC2C4.03c_G1	smd2	491	7.01339	0.0773655	0.606401	0.436146	0.995634	0	-0.276731	7.4097	0.0064873	0.0285573	-1	-0.257615	6.54482	0.010519	0.0490827	-1
G1	_	SPAC2C4.04c	SPAC2C4.04c_G1	aim29	1114	7.87464	-0.0711442	0.338274	0.560827	0.995634	0	-0.468746	14.3356	0.000152948	0.00129705	-1	-0.407469	10.9654	0.000928278	0.00706867	-1
G1	_	SPAC2C4.05	SPAC2C4.05_G1	cor1	934	8.1981	0.0347606	0.0968667	0.755623	0.995634	0	-0.159961	2.02194	0.155041	0.314752	0	-0.112603	1.0117	0.314496	0.524467	0
G1	_	SPAC2C4.06c	SPAC2C4.06c_G1	rcm1	1707	4.98964	0.178893	1.36497	0.242679	0.947728	0	0.631113	17.5641	2.7779e-05	0.000293191	1	0.52289	12.157	0.000489045	0.00416419	1
G1	_	SPAC2C4.07c	SPAC2C4.07c_G1	dis32	3267	5.89175	-0.196508	2.12968	0.144471	0.907732	0	-0.0647975	0.229001	0.632265	0.778928	0	-0.156838	1.35806	0.243874	0.449782	0
G1	_	SPAC2C4.08	SPAC2C4.08_G1		843	3.97364	0.0892965	0.261314	0.609219	0.995634	0	0.288839	2.72125	0.0990207	0.231467	0	0.272103	2.52197	0.11227	0.266755	0
G1	_	SPAC2C4.09	SPAC2C4.09_G1		1372	5.02759	0.0254097	0.0351431	0.851296	0.995634	0	0.269084	3.95442	0.0467484	0.131851	0	0.405739	9.54139	0.0020089	0.0132385	1
G1	_	SPAC2C4.10c	SPAC2C4.10c_G1	csc4	990	5.89338	-0.228613	3.60526	0.0575969	0.710752	0	-0.0386455	0.102668	0.748652	0.858177	0	-0.0814452	0.46503	0.495283	0.685795	0
G1	_	SPAC2C4.11c	SPAC2C4.11c_G1	pno1	1192	7.11055	0.0424986	0.110463	0.739618	0.995634	0	1.05035	69.0299	9.69819e-17	7.15042e-15	1	0.952221	56.9685	4.42853e-14	3.11838e-12	1
G1	_	SPAC2C4.12c	SPAC2C4.12c_G1	tpt1	1768	6.03499	-0.0768658	0.390293	0.532146	0.995634	0	-0.00264273	0.000454122	0.982998	0.991861	0	-0.0380545	0.0956106	0.757162	0.868598	0
G1	_	SPAC2C4.13	SPAC2C4.13_G1	vma16	3090	6.56668	0.0334814	0.117725	0.731515	0.995634	0	0.0650298	0.434899	0.509595	0.685186	0	0.0535749	0.300986	0.583265	0.749452	0
G1	_	SPAC2C4.14c	SPAC2C4.14c_G1	ppk11	2078	6.89763	0.0136612	0.0231953	0.87895	0.995634	0	-0.144349	2.48842	0.114687	0.255417	0	-0.0892028	0.976565	0.323048	0.533302	0
G1	_	SPAC2C4.15c	SPAC2C4.15c_G1	ubx2	1465	6.2173	0.255388	4.06257	0.0438438	0.650791	0	0.0654602	0.259888	0.610197	0.762381	0	-0.0791583	0.381242	0.536939	0.714437	0
G1	_	SPAC2C4.16c	SPAC2C4.16c_G1	rps801	711	9.43681	0.205682	2.69106	0.100913	0.842682	0	0.0986474	0.616346	0.432409	0.617712	0	0.0144141	0.0131673	0.908644	0.952765	0
G1	_	SPAC2C4.17c	SPAC2C4.17c_G1	msy2	3768	7.67934	-0.0125024	0.0190078	0.890344	0.995634	0	-0.22945	6.2374	0.012508	0.047973	-1	-0.26465	8.38018	0.00379334	0.0220937	-1
G1	_	SPBPJ4664.04	SPBPJ4664.04_G1	cop1	4019	9.12043	-0.124061	1.77013	0.183366	0.919597	0	-0.270524	8.34823	0.00386064	0.0187846	-1	-0.171252	3.36698	0.0665158	0.189307	0
G1	_	SPAC2E12.03c	SPAC2E12.03c_G1		2000	2.72487	0.147249	0.323092	0.569755	0.995634	0	-0.100804	0.13703	0.711252	0.832695	0	-0.39176	2.05159	0.152048	0.327339	0
G1	_	SPAC2E12.05	SPAC2E12.05_G1	wtf1	2974	6.269	0.00513797	0.00164085	0.967689	0.996588	0	0.274576	4.69295	0.0302866	0.0955722	0	0.171428	1.83512	0.175524	0.360659	0
G1	_	SPAC2E1P3.01	SPAC2E1P3.01_G1		1960	6.55222	0.0924125	0.47668	0.48993	0.995634	0	-0.101053	0.559831	0.454328	0.636832	0	-0.193892	2.07117	0.150106	0.324801	0
G1	_	SPAC2E1P3.02c	SPAC2E1P3.02c_G1	amt3	2384	1.91785	-0.267702	0.598635	0.439099	0.995634	0	-0.411087	1.29492	0.255143	0.437899	0	-0.226277	0.430088	0.511946	0.697319	0
G1	_	SPAC2E1P3.04	SPAC2E1P3.04_G1	cao1	3353	6.7258	-0.00817486	0.00658096	0.935344	0.995634	0	-0.0117565	0.0133426	0.908041	0.952098	0	-0.0983687	0.941442	0.331907	0.540838	0
G1	_	SPAC2E1P5.01c	SPAC2E1P5.01c_G1	mns1	2204	6.71007	0.107014	1.43796	0.23047	0.947728	0	0.101359	1.25715	0.262191	0.447116	0	-0.0274515	0.0928908	0.760534	0.869793	0
G1	_	SPAC2E1P5.02c	SPAC2E1P5.02c_G1	mug109	876	4.71641	-0.0355929	0.0704268	0.790716	0.995634	0	0.00410992	0.000902269	0.976037	0.988624	0	-0.236374	2.97764	0.0844222	0.222487	0
G1	_	SPAC2E1P5.03	SPAC2E1P5.03_G1	erj5	2199	7.1444	-0.0452407	0.138665	0.709612	0.995634	0	0.0318789	0.0681972	0.79398	0.883614	0	-0.065993	0.29259	0.588566	0.753071	0
G1	_	SPAC2E1P5.04c	SPAC2E1P5.04c_G1	cwg2	1537	5.90182	0.182072	2.9373	0.0865551	0.804915	0	-0.213541	3.70673	0.0541933	0.147345	0	-0.171714	2.4925	0.11439	0.269909	0
G1	_	SPAC2E1P5.05	SPAC2E1P5.05_G1	rrp9	1906	6.95596	0.187945	3.65452	0.0559173	0.705098	0	0.535504	29.9809	4.36329e-08	8.76435e-07	1	0.450929	21.3621	3.80212e-06	5.86818e-05	1
G1	_	SPCC1020.13c	SPCC1020.13c_G1		2699	6.16733	0.13251	1.07992	0.298714	0.970858	0	0.353024	7.64669	0.00568767	0.0257176	1	0.194441	2.32845	0.127028	0.289625	0
G1	_	SPAC2F3.01	SPAC2F3.01_G1	imt1	1143	6.1286	-0.0492646	0.224558	0.635589	0.995634	0	-0.00971882	0.0085415	0.926364	0.961816	0	-0.0958659	0.843154	0.358496	0.566632	0
G1	_	SPAC2F3.02	SPAC2F3.02_G1	sec67	2807	5.80629	0.102321	0.872485	0.350268	0.983844	0	0.113157	1.03416	0.309184	0.498754	0	0.0807598	0.538902	0.462888	0.657656	0
G1	_	SPAC2F3.03c	SPAC2F3.03c_G1	rpa49	1817	7.7205	0.00941283	0.00806495	0.928442	0.995634	0	0.412317	15.539	8.08222e-05	0.000736211	1	0.200725	3.67589	0.0552048	0.165986	0
G1	_	SPAC2F3.04c	SPAC2F3.04c_G1	rim1	1045	5.56975	-0.0994348	0.424679	0.514612	0.995634	0	-0.246052	2.50177	0.113719	0.254163	0	-0.246911	2.57094	0.108843	0.263062	0
G1	_	SPAC2F3.05c	SPAC2F3.05c_G1		1326	7.52953	0.0357928	0.0457433	0.830643	0.995634	0	-0.637538	14.0691	0.000176216	0.00145692	-1	-0.797439	22.125	2.55461e-06	4.11561e-05	-1
G1	_	SPAC2F3.06c	SPAC2F3.06c_G1	kap104	3520	8.09598	-0.0473552	0.224697	0.635484	0.995634	0	-0.251338	6.23286	0.0125401	0.0480436	-1	-0.293685	8.54678	0.00346134	0.0205613	-1
G1	_	SPAC2F3.08	SPAC2F3.08_G1	sut1	2893	7.03905	-0.0445921	0.0823589	0.774126	0.995634	0	-0.671562	18.0955	2.10097e-05	0.000231505	-1	-0.761351	23.3211	1.37087e-06	2.33457e-05	-1
G1	_	SPAC2F3.09	SPAC2F3.09_G1	hem1	2489	6.83555	-0.202571	0.997233	0.317981	0.976394	0	-0.263339	1.66168	0.197377	0.369352	0	-0.43795	4.56412	0.0326484	0.114883	0
G1	_	SPAC2F3.10	SPAC2F3.10_G1	vps54	3386	6.32856	-0.151758	1.45309	0.228033	0.947294	0	-0.27159	4.5094	0.033709	0.103419	0	-0.134424	1.13773	0.286133	0.493858	0
G1	_	SPAC2F3.11	SPAC2F3.11_G1	ppx1	1400	7.7097	0.0460054	0.24969	0.617293	0.995634	0	-0.182358	3.8232	0.0505478	0.139798	0	-0.214199	5.31822	0.0211035	0.0836533	0
G1	_	SPCC1183.05c	SPCC1183.05c_G1	lig4	3792	6.22573	0.246139	3.91674	0.0478074	0.659932	0	0.435794	12.2459	0.000466281	0.00335113	1	0.326301	6.89983	0.00862037	0.0422722	1
G1	_	SPAC2F3.12c	SPAC2F3.12c_G1	plp1	931	5.43252	-0.0252752	0.04127	0.839018	0.995634	0	0.221223	3.17176	0.0749217	0.188947	0	0.22795	3.47119	0.0624462	0.181013	0
G1	_	SPAC2F3.13c	SPAC2F3.13c_G1	qtr2	1138	5.66803	0.0334496	0.061715	0.803806	0.995634	0	0.477279	12.8626	0.000335207	0.00252493	1	0.297846	5.01391	0.0251444	0.0951569	0
G1	_	SPAC2F3.14c	SPAC2F3.14c_G1	saf2	1284	4.03963	-0.260585	1.67976	0.194956	0.922801	0	-0.0413355	0.042093	0.837443	0.907972	0	0.0294117	0.0221946	0.881571	0.936984	0
G1	_	SPAC2F3.15	SPAC2F3.15_G1	lsk1	2875	5.67347	-0.18432	2.3585	0.124602	0.889217	0	-0.226409	3.43446	0.0638494	0.167565	0	-0.190435	2.51144	0.113023	0.267692	0
G1	_	SPAC2F3.16	SPAC2F3.16_G1		2157	6.55558	0.0531956	0.184246	0.66775	0.995634	0	0.185203	2.22064	0.136177	0.28822	0	0.12334	0.992468	0.31914	0.529775	0
G1	_	SPAC2F3.17c	SPAC2F3.17c_G1	lsm6	432	6.98287	0.0268744	0.0621413	0.803143	0.995634	0	0.0640559	0.34775	0.555389	0.720676	0	0.227728	4.50558	0.0337845	0.117888	0
G1	_	SPAC2F3.18c	SPAC2F3.18c_G1		680	6.54435	0.00716983	0.00441448	0.947026	0.995634	0	-0.190286	2.97742	0.0844336	0.207141	0	0.028623	0.0703248	0.790864	0.88801	0
G1	_	SPAC2F7.02c	SPAC2F7.02c_G1	psr1	1938	5.76115	0.0409677	0.109216	0.741039	0.995634	0	0.109407	0.765497	0.381614	0.571052	0	-0.00786912	0.00399989	0.949572	0.971716	0
G1	_	SPAC2F7.03c	SPAC2F7.03c_G1	pom1	3750	6.5211	-0.16745	2.62051	0.105491	0.853477	0	0.115973	1.26516	0.260676	0.44556	0	0.0639656	0.390722	0.53192	0.712143	0
G1	_	SPAC2F7.04	SPAC2F7.04_G1	med1	2037	6.42365	-0.0828857	0.516726	0.472242	0.995634	0	0.0441284	0.145225	0.703141	0.826597	0	-0.0716771	0.385081	0.534897	0.713385	0
G1	_	SPAC2F7.05c	SPAC2F7.05c_G1	tif5	1722	8.57946	0.103528	1.16911	0.279584	0.963832	0	-0.00123538	0.000165117	0.989748	0.994863	0	-0.16535	2.95501	0.0856117	0.224959	0
G1	_	SPAC2F7.06c	SPAC2F7.06c_G1	pol4	2160	3.41176	-0.315571	1.85156	0.173602	0.919597	0	-0.621007	6.52029	0.0106651	0.0427079	-1	-0.243292	1.11553	0.290883	0.498635	0
G1	_	SPAC2F7.07c	SPAC2F7.07c_G1	cph2	2114	6.70841	-0.167924	2.23844	0.134617	0.901541	0	0.195292	3.06378	0.0800553	0.198146	0	0.199756	3.25276	0.0713031	0.198251	0
G1	_	SPAC2F7.08c	SPAC2F7.08c_G1	snf5	1899	5.55708	-0.0700522	0.339441	0.560152	0.995634	0	0.187858	2.45427	0.117205	0.258727	0	0.310292	7.01804	0.00806925	0.0401349	1
G1	_	SPAC2F7.09c	SPAC2F7.09c_G1	gep3	1959	6.07807	0.0353136	0.121966	0.726912	0.995634	0	0.154458	2.29728	0.129601	0.278545	0	0.222393	4.95417	0.0260278	0.097441	0
G1	_	SPAC2F7.10	SPAC2F7.10_G1	akr1	2966	6.43049	0.0144485	0.017329	0.895269	0.995634	0	-0.0933823	0.701826	0.402171	0.590951	0	-0.0336402	0.0933322	0.759983	0.869793	0
G1	_	SPAC2F7.11	SPAC2F7.11_G1	nrd1	3775	6.25847	-0.422576	7.0348	0.0079941	0.363036	0	-0.159464	1.01321	0.314135	0.504285	0	-0.0110573	0.0049371	0.943983	0.969827	0
G1	_	SPCC11E10.09c	SPCC11E10.09c_G1		5441	5.86917	0.0806334	0.476116	0.490187	0.995634	0	0.296217	6.42976	0.0112224	0.0445412	1	0.240652	4.32163	0.0376308	0.12686	0
G1	_	SPAC2F7.14c	SPAC2F7.14c_G1	rrp4	1356	6.24908	-0.0584076	0.2797	0.596898	0.995634	0	0.0850685	0.587259	0.443481	0.627522	0	-0.105517	0.903215	0.341921	0.550457	0
G1	_	SPAC2F7.15	SPAC2F7.15_G1	rsm24	1288	6.38931	0.117065	1.13529	0.28665	0.969025	0	0.206138	3.46566	0.0626554	0.164915	0	0.191403	3.03955	0.0812583	0.216608	0
G1	_	SPAC2F7.16c	SPAC2F7.16c_G1	pld1	4451	6.71906	-0.18586	2.60665	0.106416	0.853918	0	-0.0879998	0.580471	0.446128	0.629845	0	-0.0798399	0.485382	0.485994	0.677108	0
G1	_	SPAC2F7.17	SPAC2F7.17_G1	mrf1	1948	5.93016	0.118251	1.25168	0.263232	0.954461	0	0.397255	14.2411	0.000160822	0.00134923	1	0.242272	5.33305	0.0209247	0.0830135	0
G1	_	SPAC2G11.02	SPAC2G11.02_G1	urb2	4243	7.32884	0.0167624	0.0334912	0.854793	0.995634	0	0.143161	2.42639	0.119307	0.262074	0	0.0522796	0.326124	0.56795	0.738419	0
G1	_	SPAC2G11.03c	SPAC2G11.03c_G1	vps45	2599	5.76667	-0.164569	1.70674	0.191409	0.920373	0	0.175502	1.96696	0.160771	0.322622	0	0.117627	0.89919	0.342999	0.551173	0
G1	_	SPAC2G11.04	SPAC2G11.04_G1	rbm17	1273	4.90101	0.0883542	0.453604	0.500628	0.995634	0	0.184717	1.93624	0.164077	0.326918	0	-0.0455324	0.117302	0.73198	0.854686	0
G1	_	SPAC2G11.05c	SPAC2G11.05c_G1	alx1	2597	5.74765	0.184336	2.72026	0.0990816	0.835726	0	0.364419	10.5806	0.00114283	0.00709824	1	0.0856729	0.579445	0.44653	0.644322	0
G1	_	SPAC2G11.06	SPAC2G11.06_G1	vps4	1509	6.2129	0.0761448	0.463524	0.495982	0.995634	0	-0.0381713	0.112441	0.737383	0.850262	0	-0.15773	1.93647	0.164052	0.344571	0
G1	_	SPAC2G11.07c	SPAC2G11.07c_G1	ptc3	1856	8.72181	0.092051	0.952523	0.329078	0.978887	0	-0.00600296	0.00401918	0.94945	0.973721	0	-0.060912	0.414702	0.519592	0.701937	0
G1	_	SPAC2G11.08c	SPAC2G11.08c_G1	smn1	1128	5.24185	0.0353795	0.0725227	0.787699	0.995634	0	0.439644	11.544	0.000679671	0.00459989	1	0.326761	6.4666	0.010992	0.0508555	0
G1	_	SPAC2G11.09	SPAC2G11.09_G1		2798	6.92617	0.0356693	0.137175	0.711106	0.995634	0	-0.235303	5.72231	0.0167507	0.0603315	0	-0.148284	2.33111	0.126811	0.289412	0
G1	_	SPCC1235.09	SPCC1235.09_G1	hif2	1978	6.39109	0.0441241	0.146442	0.701959	0.995634	0	0.30863	7.18626	0.00734641	0.0317956	1	0.177912	2.39937	0.121384	0.281316	0
G1	_	SPAC2G11.10c	SPAC2G11.10c_G1	uba42	1543	5.41057	0.0748551	0.302299	0.582445	0.995634	0	-0.0129403	0.00868938	0.925731	0.961586	0	0.163764	1.45453	0.227803	0.431311	0
G1	_	SPAC2G11.11c	SPAC2G11.11c_G1	prh1	3183	6.01031	-0.119879	1.22453	0.268473	0.956522	0	0.251321	5.49295	0.0190933	0.066736	0	0.1995	3.52824	0.0603317	0.177096	0
G1	_	SPAC2G11.12	SPAC2G11.12_G1	rqh1	4177	6.63014	-0.120604	1.26116	0.261431	0.953667	0	0.169258	2.49603	0.114133	0.254603	0	0.138245	1.69188	0.193354	0.386276	0
G1	_	SPAC2G11.13	SPAC2G11.13_G1	atg22	2051	5.88278	0.0496453	0.164689	0.684875	0.995634	0	0.194277	2.4969	0.11407	0.254587	0	0.284133	5.52539	0.0187424	0.0765204	0
G1	_	SPAC2G11.14	SPAC2G11.14_G1	taf1	3207	6.86495	-0.0373741	0.13283	0.715516	0.995634	0	-0.0765066	0.545717	0.460073	0.641623	0	-0.19865	3.69447	0.054593	0.164668	0
G1	_	SPAC2G11.15c	SPAC2G11.15c_G1	tgs1	955	4.87249	-0.0262953	0.02696	0.869578	0.995634	0	-0.0289254	0.0316205	0.858863	0.920872	0	-0.0731912	0.206831	0.649262	0.799592	0
G1	_	SPAC2H10.01	SPAC2H10.01_G1		2972	3.99137	-0.694733	4.87231	0.0272909	0.573515	0	0.043128	0.0197523	0.888231	0.939977	0	0.356776	1.38692	0.238926	0.443922	0
G1	_	SPAC2H10.02c	SPAC2H10.02c_G1	nas2	855	5.41219	0.118875	0.988362	0.320143	0.976973	0	0.168034	1.91919	0.165946	0.329735	0	-0.0053237	0.00193852	0.964882	0.980745	0
G1	_	SPCC1259.05c	SPCC1259.05c_G1	cox9	686	5.57412	0.245956	3.21594	0.0729244	0.778516	0	0.443864	10.4162	0.00124918	0.00761538	1	0.291589	4.53403	0.0332273	0.116593	0
G1	_	SPCC1259.07	SPCC1259.07_G1	rxt3	1954	6.0868	0.0901355	0.80497	0.369612	0.991043	0	0.25532	6.4108	0.0113428	0.0448822	1	0.151362	2.28583	0.13056	0.295331	0
G1	_	SPAC30.02c	SPAC30.02c_G1	kti12	1006	6.39987	0.00825732	0.00490264	0.944179	0.995634	0	0.384759	10.7662	0.00103372	0.00654505	1	0.352616	9.13674	0.00250528	0.0158112	1
G1	_	SPAC30.03c	SPAC30.03c_G1	tsn1	1041	7.95352	0.166553	1.40368	0.236108	0.947728	0	-0.397093	7.79376	0.00524269	0.0241943	-1	-0.46218	10.6457	0.00110326	0.00814385	-1
G1	_	SPAC30.04c	SPAC30.04c_G1	abc4	4696	8.1076	-0.178988	3.15737	0.0755851	0.779265	0	-0.109057	1.1661	0.280203	0.465421	0	-0.0737965	0.537934	0.46329	0.658078	0
G1	_	SPCC1393.05	SPCC1393.05_G1	ers1	2961	6.17906	0.157084	1.9667	0.160798	0.919597	0	0.354592	9.98967	0.00157421	0.00901789	1	0.285827	6.57205	0.0103593	0.0484851	1
G1	_	SPAC30C2.02	SPAC30C2.02_G1	mmd1	1414	5.64521	-0.0650944	0.152349	0.6963	0.995634	0	0.458095	7.69504	0.00553727	0.025223	1	0.102908	0.383706	0.535626	0.713903	0
G1	_	SPAC30C2.03	SPAC30C2.03_G1		825	5.41455	-0.0122801	0.00741773	0.931366	0.995634	0	-0.212759	2.118	0.145577	0.301712	0	-0.0789734	0.3045	0.581075	0.748376	0
G1	_	SPAC30C2.04	SPAC30C2.04_G1	asc1	1531	8.65058	-0.0580629	0.386274	0.534264	0.995634	0	0.0504314	0.290292	0.590034	0.748228	0	-0.0656635	0.49256	0.482788	0.67431	0
G1	_	SPAC30C2.05	SPAC30C2.05_G1	erv14	956	5.96434	-0.00296965	0.000803974	0.977379	0.9991	0	-0.247988	5.24379	0.0220253	0.0750175	0	-0.0438315	0.173879	0.676687	0.819192	0
G1	_	SPAC30C2.06c	SPAC30C2.06c_G1	dml1	1778	5.96507	-0.00553235	0.00156236	0.96847	0.996661	0	0.226499	2.62149	0.105425	0.242726	0	0.0521326	0.139386	0.708892	0.840084	0
G1	_	SPAC30C2.07	SPAC30C2.07_G1	fnp1	2888	7.57442	-0.0352233	0.151534	0.697074	0.995634	0	-0.158809	3.01237	0.0826313	0.203558	0	-0.131977	2.11154	0.146192	0.319563	0
G1	_	SPAC30C2.08	SPAC30C2.08_G1		1992	7.09644	-0.117978	1.40932	0.235169	0.947728	0	-0.150333	2.24608	0.133953	0.285248	0	-0.194685	3.80786	0.0510126	0.157022	0
G1	_	SPAC30D11.01c	SPAC30D11.01c_G1	gto2	3894	6.16104	-0.00809171	0.00531232	0.941897	0.995634	0	0.160952	2.0881	0.14845	0.305753	0	0.3049	7.79262	0.00524601	0.0284647	1
G1	_	SPAC30D11.03	SPAC30D11.03_G1	ddx27	2423	6.59656	0.244383	5.97985	0.0144702	0.46385	0	0.929558	90.9869	1.4463e-21	2.01422e-19	1	0.809213	69.2557	8.64925e-17	8.33921e-15	1
G1	_	SPAC30D11.04c	SPAC30D11.04c_G1	nup124	3656	6.56875	-0.268066	6.55235	0.0104746	0.400269	0	0.0591413	0.323129	0.569733	0.731364	0	0.139452	1.84658	0.174182	0.358841	0
G1	_	SPAC30D11.05	SPAC30D11.05_G1	aps3	1369	5.34731	0.0521934	0.147502	0.700934	0.995634	0	-0.171558	1.50837	0.219388	0.396987	0	-0.101528	0.546817	0.459621	0.654052	0
G1	_	SPAC30D11.06c	SPAC30D11.06c_G1	hfl1	1939	6.6577	0.00462188	0.00252807	0.959899	0.995634	0	0.00900148	0.00934252	0.922999	0.960612	0	0.0124581	0.018329	0.892308	0.943916	0
G1	_	SPCC1393.11	SPCC1393.11_G1	mrpl20	2214	5.62068	-0.110339	0.860335	0.353645	0.983969	0	-0.327216	7.10683	0.00767909	0.0329848	-1	-0.242609	4.07897	0.04342	0.140409	0
G1	_	SPAC30D11.07	SPAC30D11.07_G1	nth1	1456	3.8675	-0.208575	1.27426	0.25897	0.951104	0	0.28507	2.52754	0.111875	0.25252	0	0.204658	1.34156	0.246759	0.453235	0
G1	_	SPAC30D11.08c	SPAC30D11.08c_G1	phf2	1807	6.17765	0.059986	0.289022	0.590848	0.995634	0	-0.065031	0.327418	0.567183	0.729285	0	-0.207098	3.33966	0.0676285	0.191517	0
G1	_	SPCC13B11.01	SPCC13B11.01_G1	adh1	3463	10.7193	-0.279896	8.9145	0.00282916	0.243496	0	-0.426769	20.6267	5.58128e-06	7.09491e-05	-1	-0.276408	8.68747	0.00320405	0.0193634	-1
G1	_	SPAC30D11.09	SPAC30D11.09_G1	cwf19	2119	5.32267	0.148756	0.968652	0.325017	0.978678	0	0.530729	12.504	0.000406081	0.00297551	1	0.309281	4.23383	0.039626	0.131717	0
G1	_	SPAC30D11.10	SPAC30D11.10_G1	rad52	2095	5.07788	-0.334642	5.60329	0.0179268	0.507757	0	-0.0529684	0.14138	0.706913	0.829164	0	0.0549092	0.159599	0.689526	0.826087	0
G1	_	SPAC30D11.11	SPAC30D11.11_G1	izh3	2106	6.36681	-0.0633909	0.379359	0.537947	0.995634	0	-0.119592	1.30814	0.252732	0.435907	0	-0.184068	3.13985	0.0764006	0.207518	0
G1	_	SPAC30D11.12	SPAC30D11.12_G1	rpl3802	488	9.38072	0.0558844	0.261558	0.609052	0.995634	0	-0.0642769	0.343754	0.55767	0.72259	0	0.0633997	0.336207	0.562027	0.734102	0
G1	_	SPCC1494.02c	SPCC1494.02c_G1	taf13	825	6.49903	-0.133819	1.59865	0.206095	0.932066	0	-0.286581	7.04916	0.00793023	0.0338065	-1	-0.178434	2.82243	0.0929557	0.236307	0
G1	_	SPAC30D11.14c	SPAC30D11.14c_G1		1993	5.76388	-0.00776896	0.00364522	0.951856	0.995634	0	0.108394	0.702415	0.401973	0.590799	0	0.0659844	0.264645	0.606947	0.768677	0
G1	_	SPAC31A2.02	SPAC31A2.02_G1	trm112	817	6.74361	0.174524	1.54251	0.214244	0.934145	0	0.830564	35.2027	2.97104e-09	7.50787e-08	1	0.696276	24.8876	6.07726e-07	1.1169e-05	1
G1	_	SPCC16C4.18c	SPCC16C4.18c_G1	taf6	2514	6.13548	-0.249038	5.42249	0.019879	0.512588	0	-0.442423	16.2451	5.56542e-05	0.000534127	-1	-0.417447	14.8756	0.000114838	0.00119948	-1
G1	_	SPAC31A2.03	SPAC31A2.03_G1	mrp11	1078	7.01583	0.00501095	0.00225751	0.962104	0.995634	0	-0.0479428	0.202424	0.652771	0.792967	0	-0.117515	1.22485	0.26841	0.475455	0
G1	_	SPAC31A2.04c	SPAC31A2.04c_G1	pre1	854	7.35621	-0.041834	0.172297	0.678079	0.995634	0	-0.203297	3.96784	0.0463772	0.13104	0	-0.177923	3.08947	0.0788005	0.212132	0
G1	_	SPAC31A2.05c	SPAC31A2.05c_G1	mis4	5084	7.20442	-0.0479646	0.16866	0.681305	0.995634	0	0.148647	1.616	0.20365	0.378267	0	0.0505947	0.188083	0.664517	0.809702	0
G1	_	SPAC31A2.06	SPAC31A2.06_G1	atp25	5062	6.60931	-0.0309337	0.103301	0.747903	0.995634	0	0.0366735	0.142675	0.705636	0.828596	0	-0.0101345	0.0110542	0.916266	0.957019	0
G1	_	SPCC1739.07	SPCC1739.07_G1	cti1	1626	7.27282	0.152897	2.04989	0.152217	0.912912	0	0.270294	6.36584	0.0116338	0.0455398	1	0.234324	4.81244	0.028255	0.103734	0
G1	_	SPAC31A2.08	SPAC31A2.08_G1	mrp20	1022	6.08519	-0.104142	0.924362	0.336332	0.982694	0	0.195662	3.29488	0.0694961	0.177911	0	0.0228718	0.0451882	0.831658	0.90974	0
G1	_	SPAC31A2.09c	SPAC31A2.09c_G1	apm4	2575	6.58263	0.0371751	0.156652	0.692258	0.995634	0	0.096151	1.02756	0.310732	0.50064	0	0.0914251	0.949223	0.329917	0.539278	0
G1	_	SPAC31A2.10	SPAC31A2.10_G1		1848	6.2059	0.148684	1.80687	0.178885	0.919597	0	0.194919	3.05361	0.080558	0.199233	0	-0.0598221	0.285672	0.593008	0.756438	0
G1	_	SPAC31A2.11c	SPAC31A2.11c_G1	cuf1	2159	6.29996	0.020339	0.0299876	0.862518	0.995634	0	0.224278	3.63071	0.0567228	0.152784	0	0.162809	1.93466	0.164249	0.344841	0
G1	_	SPAC31A2.12	SPAC31A2.12_G1	rod1	2798	5.92324	-0.087932	0.341862	0.558757	0.995634	0	-0.0127687	0.00713052	0.932705	0.964846	0	-0.0703505	0.217982	0.640582	0.794169	0
G1	_	SPAC31A2.13c	SPAC31A2.13c_G1	sft1	632	5.79448	-0.0243329	0.0323631	0.857233	0.995634	0	-0.0751948	0.299746	0.584042	0.743966	0	0.124515	0.854624	0.355248	0.56388	0
G1	_	SPAC31A2.14	SPAC31A2.14_G1	bun107	3486	6.32907	-0.0942359	0.647308	0.421077	0.995634	0	-0.19913	2.8051	0.0939651	0.222976	0	-0.0812406	0.480062	0.488394	0.678983	0
G1	_	SPCC1739.09c	SPCC1739.09c_G1	cox13	714	8.07719	0.331444	7.28835	0.00694034	0.353274	0	0.453275	13.5171	0.000236405	0.00188973	1	0.34641	7.94115	0.00483232	0.0266586	1
G1	_	SPAC31A2.15c	SPAC31A2.15c_G1	dcc1	1990	6.58665	0.0975659	1.0762	0.29955	0.970858	0	0.362543	14.9329	0.0001114	0.000976427	1	0.292026	9.82764	0.00171908	0.0116849	1
G1	_	SPAC31A2.16	SPAC31A2.16_G1	gef2	3902	6.92928	-0.0868265	0.933753	0.33389	0.982605	0	-0.0265171	0.0856879	0.769732	0.869941	0	-0.0390144	0.188985	0.663762	0.809702	0
G1	_	SPAC31F12.01	SPAC31F12.01_G1	zds1	4793	6.23002	-0.221983	2.85992	0.0908122	0.815836	0	-0.0656738	0.249666	0.61731	0.768206	0	-0.0366196	0.0790087	0.778645	0.880984	0
G1	_	SPAC31G5.01	SPAC31G5.01_G1	sap49	1481	5.45997	-0.0386415	0.1035	0.74767	0.995634	0	-0.382133	9.32697	0.00225805	0.0122415	-1	-0.560784	20.1678	7.09358e-06	0.000100578	-1
G1	_	SPAC31G5.02	SPAC31G5.02_G1	rot1	1153	7.13374	-0.0320397	0.112645	0.737152	0.995634	0	-0.200498	4.27003	0.0387901	0.11461	0	-0.152545	2.52327	0.112177	0.266755	0
G1	_	SPAC31G5.03	SPAC31G5.03_G1	rps1101	619	7.51176	0.104604	0.335991	0.562152	0.995634	0	0.0128017	0.00496617	0.943819	0.970294	0	-0.0469184	0.0668958	0.795911	0.891204	0
G1	_	SPCC1739.12	SPCC1739.12_G1	ppe1	3526	8.00182	-0.0264015	0.0805601	0.77654	0.995634	0	-0.28213	8.98908	0.00271597	0.0142336	-1	-0.146275	2.45459	0.117182	0.274431	0
G1	_	SPAC31G5.04	SPAC31G5.04_G1	lys12	1507	5.30237	0.00260406	0.000251163	0.987356	0.9991	0	-1.02083	33.9314	5.709e-09	1.37082e-07	-1	-0.792767	21.5893	3.37739e-06	5.23913e-05	-1
G1	_	SPAC31G5.05c	SPAC31G5.05c_G1	rpe1	1097	8.45972	0.127872	1.90925	0.167047	0.919597	0	-0.193871	4.30688	0.0379585	0.112742	0	-0.145164	2.43265	0.118832	0.277141	0
G1	_	SPAC31G5.06	SPAC31G5.06_G1	rrg8	705	3.51233	-0.297894	1.59917	0.206022	0.932066	0	0.250541	1.20021	0.27328	0.458662	0	0.165164	0.525201	0.468631	0.662219	0
G1	_	SPAC31G5.07	SPAC31G5.07_G1	dni1	705	3.31237	0.232464	1.12376	0.28911	0.96975	0	0.644948	9.13258	0.00251097	0.0133698	1	0.307138	2.01969	0.155271	0.332224	0
G1	_	SPAC31G5.08	SPAC31G5.08_G1	hem4	2322	6.74389	0.0518975	0.225442	0.634924	0.995634	0	0.0492937	0.19982	0.654866	0.794297	0	0.202216	3.44522	0.0634351	0.182865	0
G1	_	SPAC31G5.09c	SPAC31G5.09c_G1	spk1	2142	6.27895	-0.15751	0.387262	0.533742	0.995634	0	-0.161455	0.40641	0.523797	0.695474	0	-0.498989	3.75511	0.0526464	0.160474	0
G1	_	SPAC31G5.10	SPAC31G5.10_G1	eta2	1710	3.57056	-0.148522	0.512124	0.474221	0.995634	0	-0.0633588	0.0905889	0.76343	0.866742	0	0.0663273	0.106924	0.743674	0.861247	0
G1	_	SPAC31G5.11	SPAC31G5.11_G1	pac2	708	8.39835	-0.140425	1.19103	0.275122	0.963832	0	-0.18273	2.00455	0.156828	0.317251	0	-0.374639	8.38246	0.00378859	0.0220866	-1
G1	_	SPAC31G5.12c	SPAC31G5.12c_G1	maf1	1444	4.1507	0.0179246	0.00746573	0.931145	0.995634	0	0.40968	4.01312	0.0451475	0.128376	0	0.281815	1.92233	0.1656	0.347094	0
G1	_	SPAC31G5.13	SPAC31G5.13_G1	rpn11	1676	7.95119	-0.0348363	0.142511	0.705797	0.995634	0	-0.294907	9.96574	0.0015948	0.00911917	-1	-0.0877277	0.901203	0.342459	0.55073	0
G1	_	SPCC1739.13	SPCC1739.13_G1	ssa2	2248	10.6722	-0.147301	2.38227	0.122719	0.889217	0	-0.336321	12.3591	0.000438832	0.00317881	-1	-0.150318	2.47952	0.115338	0.270936	0
G1	_	SPAC31G5.14	SPAC31G5.14_G1	gcv1	1963	6.96005	-0.0139704	0.0178327	0.893767	0.995634	0	-0.625765	33.5151	7.07115e-09	1.62326e-07	-1	-0.54615	26.1656	3.13351e-07	6.19486e-06	-1
G1	_	SPAC31G5.15	SPAC31G5.15_G1	psd3	3313	6.23597	0.168345	2.34299	0.125847	0.889217	0	0.0474184	0.179334	0.671946	0.804563	0	0.0688174	0.386875	0.533946	0.713126	0
G1	_	SPAC31G5.16c	SPAC31G5.16c_G1	dpm1	4336	7.94768	0.111597	0.881696	0.347737	0.983844	0	0.341902	8.24337	0.0040901	0.0197174	1	0.377083	10.0742	0.00150361	0.0105181	1
G1	_	SPAC31G5.17c	SPAC31G5.17c_G1	rps1001	835	6.42015	0.0942266	0.372675	0.54155	0.995634	0	-0.158788	1.0295	0.310277	0.500258	0	-0.185255	1.41646	0.233987	0.438254	0
G1	_	SPAC31G5.18c	SPAC31G5.18c_G1	sde2	1144	5.66112	0.0684856	0.28863	0.5911	0.995634	0	-0.00828084	0.00407782	0.949083	0.973721	0	-0.0148062	0.0133452	0.908032	0.952602	0
G1	_	SPAC31G5.19	SPAC31G5.19_G1	abo1	5046	7.54129	0.0198738	0.0338422	0.854043	0.995634	0	0.124761	1.32666	0.2494	0.431884	0	0.146102	1.83552	0.175477	0.360659	0
G1	_	SPAC31G5.21	SPAC31G5.21_G1		697	5.94523	-0.172156	1.92412	0.165403	0.919597	0	-0.0314855	0.0636865	0.800761	0.887265	0	-0.133374	1.15737	0.282012	0.490947	0
G1	_	SPAC323.01c	SPAC323.01c_G1	pos5	1417	5.40882	-0.0071419	0.00335477	0.953812	0.995634	0	0.103955	0.699158	0.403067	0.591851	0	0.162909	1.78818	0.181148	0.36871	0
G1	_	SPAC323.02c	SPAC323.02c_G1	pup2	934	8.22332	-0.0214282	0.0342296	0.853219	0.995634	0	0.0752224	0.419289	0.517292	0.69123	0	0.12425	1.14935	0.283686	0.49235	0
G1	_	SPAC323.03c	SPAC323.03c_G1	pex8	1977	6.04241	0.0362398	0.113249	0.736475	0.995634	0	-0.277048	6.1793	0.0129253	0.0491821	-1	-0.172511	2.49097	0.114501	0.269917	0
G1	_	SPAC323.04	SPAC323.04_G1		1778	5.69755	-0.232566	3.44105	0.0635952	0.742181	0	-0.676601	26.7657	2.29672e-07	3.96517e-06	-1	-0.531771	17.3234	3.15284e-05	0.00038667	-1
G1	_	SPCC18.01c	SPCC18.01c_G1	adg3	4783	7.30388	-0.498334	11.4504	0.000714801	0.111654	0	-0.405274	7.47832	0.00624463	0.0277751	-1	-0.327447	4.95271	0.0260498	0.0974651	0
G1	_	SPAC323.06c	SPAC323.06c_G1	uba5	1789	6.51728	0.134699	1.34146	0.246777	0.947977	0	0.271041	5.39213	0.0202278	0.0699987	0	0.291886	6.346	0.0117646	0.0534268	0
G1	_	SPAC323.07c	SPAC323.07c_G1		2422	6.41586	-0.0517666	0.174794	0.675886	0.995634	0	-0.463744	13.3065	0.000264494	0.00208239	-1	-0.20899	2.80644	0.0938863	0.237983	0
G1	_	SPAC323.08	SPAC323.08_G1	rmp1	694	4.52858	-0.0783557	0.210527	0.646354	0.995634	0	0.0449514	0.0684773	0.793567	0.883511	0	-0.212792	1.51935	0.217718	0.416877	0
G1	_	SPAC328.01c	SPAC328.01c_G1	msn5	4438	7.28649	-0.133488	1.28715	0.256575	0.951104	0	-0.114183	0.93207	0.334326	0.526665	0	0.00289416	0.000608923	0.980313	0.98977	0
G1	_	SPCC18.14c	SPCC18.14c_G1	rpp0	2147	8.56773	0.118061	0.752953	0.385543	0.991043	0	0.376965	7.63449	0.00572626	0.0258548	1	0.245312	3.24296	0.0717309	0.198999	0
G1	_	SPAC328.02	SPAC328.02_G1	dbl4	3994	7.08356	-0.0293085	0.0975652	0.754771	0.995634	0	-0.136164	2.05005	0.152201	0.310496	0	-0.20091	4.51523	0.0335945	0.117356	0
G1	_	SPAC328.03	SPAC328.03_G1	tps1	2208	9.13627	0.00585843	0.00311253	0.955509	0.995634	0	-0.768646	52.2316	4.93251e-13	2.22389e-11	-1	-0.786875	54.8688	1.28852e-13	8.50014e-12	-1
G1	_	SPAC328.04	SPAC328.04_G1	spg4	3101	5.80951	0.047748	0.180267	0.671144	0.995634	0	-0.37728	10.3066	0.00132556	0.00798008	-1	-0.341441	8.75525	0.00308711	0.0187289	-1
G1	_	SPAC328.05	SPAC328.05_G1	hrb1	1984	5.27623	-0.11378	0.785004	0.375615	0.991043	0	0.285406	5.09507	0.0239939	0.0801306	0	0.382236	9.58035	0.00196671	0.0130427	1
G1	_	SPAC328.06	SPAC328.06_G1	ubp2	3823	7.97918	0.0130254	0.019343	0.889388	0.995634	0	-0.0949353	1.01331	0.314112	0.504285	0	-0.141424	2.26328	0.132473	0.297589	0
G1	_	SPAC328.07c	SPAC328.07c_G1	bsd1	1506	5.73037	-0.0549015	0.207484	0.648747	0.995634	0	-0.293983	5.60885	0.01787	0.0633434	0	-0.155027	1.62702	0.202116	0.396948	0
G1	_	SPAC328.08c	SPAC328.08c_G1	tbc1	1734	4.48909	0.0295867	0.0297923	0.862962	0.995634	0	0.190253	1.22447	0.268484	0.453603	0	0.177923	1.10077	0.294097	0.501117	0
G1	_	SPAC328.09	SPAC328.09_G1		1564	4.18509	-0.011463	0.00522608	0.94237	0.995634	0	-0.656099	14.3671	0.000150407	0.00127723	-1	-0.583977	12.1422	0.000492931	0.00419159	-1
G1	_	SPAC328.10c	SPAC328.10c_G1	rps502	760	8.85127	0.166612	2.65765	0.103053	0.847879	0	0.0937613	0.836593	0.360373	0.550493	0	0.024309	0.0562836	0.812469	0.899761	0
G1	_	SPAC32A11.01	SPAC32A11.01_G1	mug8	2352	5.22061	-0.225045	2.49737	0.114036	0.867479	0	-0.017581	0.0151057	0.902182	0.948176	0	-0.149848	1.1083	0.292453	0.499929	0
G1	_	SPAC32A11.02c	SPAC32A11.02c_G1		3037	6.4204	-0.0862336	0.143068	0.70525	0.995634	0	0.0284133	0.0153502	0.901398	0.947702	0	0.249601	1.18182	0.276987	0.486103	0
G1	_	SPAC2E1P3.05c	SPAC2E1P3.05c_G1	cbm1	1964	7.58839	-0.917824	33.6746	6.51472e-09	1.36093e-05	-1	0.0602759	0.149265	0.699238	0.824173	0	-0.102615	0.43488	0.509604	0.695574	0
G1	_	SPCC1840.11	SPCC1840.11_G1	csl4	954	7.41344	0.0815734	0.707109	0.400405	0.991347	0	0.270161	7.73066	0.00542909	0.024817	1	0.165091	2.8928	0.0889761	0.229093	0
G1	_	SPAC32A11.03c	SPAC32A11.03c_G1	phx1	4722	7.04344	-0.0343892	0.12677	0.721805	0.995634	0	-0.0301044	0.0953418	0.757493	0.863755	0	0.0928756	0.931615	0.334444	0.543299	0
G1	_	SPAC32A11.04c	SPAC32A11.04c_G1	tif212	1071	8.04249	-0.0828545	0.600394	0.438428	0.995634	0	-0.284726	6.98902	0.00820113	0.0346571	-1	-0.318093	8.77198	0.00305893	0.0185759	-1
G1	_	SPCC188.06c	SPCC188.06c_G1	srp54	1798	6.6331	-0.00689496	0.00496202	0.943842	0.995634	0	-0.251254	6.28064	0.0122064	0.0471767	-1	-0.1715	3.01086	0.0827084	0.219497	0
G1	_	SPCC188.08c	SPCC188.08c_G1	ubp5	3793	6.53595	-0.295104	7.93545	0.00484756	0.304301	0	-0.357762	11.3186	0.000767349	0.00509965	-1	-0.25747	6.06444	0.0137931	0.0599454	0
G1	_	SPAC343.01c	SPAC343.01c_G1	erg8	2632	7.3106	-0.044861	0.211096	0.64591	0.995634	0	0.00283958	0.000835669	0.976938	0.988931	0	-0.0112166	0.0131578	0.908677	0.952765	0
G1	_	SPAC343.02	SPAC343.02_G1	img1	1271	6.47903	0.0675015	0.36872	0.543703	0.995634	0	0.01395	0.0153406	0.901428	0.947702	0	0.10498	0.893338	0.344574	0.553106	0
G1	_	SPAC343.03	SPAC343.03_G1	apc11	1119	5.24034	0.0569764	0.184429	0.667594	0.995634	0	0.292757	4.88767	0.0270491	0.0875152	0	0.288897	4.90296	0.0268106	0.0997692	0
G1	_	SPAC343.04c	SPAC343.04c_G1	gid7	1912	6.89184	0.0642124	0.301579	0.582894	0.995634	0	0.158006	1.8154	0.177862	0.344883	0	0.0485579	0.171946	0.678388	0.819954	0
G1	_	SPAC343.05	SPAC343.05_G1	vma1	2115	8.55242	-0.0420962	0.213757	0.643838	0.995634	0	0.0115543	0.0160196	0.899282	0.94656	0	0.125669	1.91118	0.166833	0.348746	0
G1	_	SPAC343.06c	SPAC343.06c_G1		1401	4.94068	-0.046917	0.0946119	0.758394	0.995634	0	0.0829311	0.292207	0.588809	0.747356	0	-0.00180199	0.000140141	0.990555	0.994861	0
G1	_	SPAC343.07	SPAC343.07_G1	mug28	1830	1.01816	-0.628227	1.81537	0.177866	0.919597	0	-0.251524	0.297305	0.585577	0.74514	0	-0.561956	1.47386	0.224737	0.426913	0
G1	_	SPAC343.08c	SPAC343.08c_G1	mrp17	2895	7.39293	0.0146341	0.0287608	0.865332	0.995634	0	-0.110978	1.60876	0.204666	0.379592	0	-0.0445492	0.26454	0.607018	0.768677	0
G1	_	SPAC343.09	SPAC343.09_G1	ubx3	1833	8.79344	0.0207354	0.0450546	0.831904	0.995634	0	-0.221918	5.10358	0.0238766	0.079933	0	-0.19604	4.00311	0.0454163	0.144626	0
G1	_	SPAC343.10	SPAC343.10_G1	met11	2253	6.53737	0.0169503	0.0181861	0.892726	0.995634	0	-0.0139974	0.0121832	0.91211	0.954608	0	-0.025001	0.0392979	0.84286	0.916095	0
G1	_	SPCC191.02c	SPCC191.02c_G1	acs1	2278	8.19735	-0.26437	8.48883	0.00357333	0.26877	0	-0.332054	13.2162	0.000277544	0.00216201	-1	-0.178205	3.86417	0.0493277	0.153019	0
G1	_	SPAC343.11c	SPAC343.11c_G1	msc1	5031	6.1311	-0.185441	3.08153	0.0791858	0.789928	0	-0.0161496	0.0232014	0.878934	0.934076	0	0.0285475	0.0749069	0.784322	0.884214	0
G1	_	SPAC343.12	SPAC343.12_G1	rds1	1996	5.71005	-0.352441	3.05546	0.0804664	0.793125	0	-1.21232	33.431	7.38387e-09	1.68272e-07	-1	-1.1976	33.0909	8.7948e-09	2.47162e-07	-1
G1	_	SPAC343.13	SPAC343.13_G1	gta2	1846	5.1516	-0.148029	1.16453	0.280528	0.964913	0	0.210117	2.40062	0.121287	0.265308	0	0.215911	2.61375	0.105941	0.258238	0
G1	_	SPAC343.14c	SPAC343.14c_G1	tif222	1448	6.55406	0.0286801	0.0898422	0.764378	0.995634	0	0.107311	1.23585	0.266273	0.451252	0	0.129082	1.83036	0.176084	0.361538	0
G1	_	SPAC343.15	SPAC343.15_G1	tit1	1822	4.2226	-0.324281	2.12114	0.145278	0.907732	0	-0.313209	1.93598	0.164106	0.326918	0	-0.122935	0.313549	0.575511	0.744576	0
G1	_	SPAC343.16	SPAC343.16_G1	lys2	2389	8.21426	0.0179164	0.0340633	0.853572	0.995634	0	-0.664178	45.0437	1.92683e-11	6.90025e-10	-1	-0.564344	32.9273	9.56707e-09	2.67266e-07	-1
G1	_	SPAC343.17c	SPAC343.17c_G1	wdr70	6403	5.47824	0.0460058	0.148363	0.700105	0.995634	0	-0.312264	6.26516	0.0123135	0.0474009	-1	-0.2392	3.84598	0.0498654	0.154248	0
G1	_	SPAC343.18	SPAC343.18_G1	rfp2	1214	5.89885	0.0249214	0.0319302	0.858181	0.995634	0	0.038672	0.0752696	0.783813	0.877485	0	0.0955337	0.468877	0.493504	0.684094	0
G1	_	SPAC343.19	SPAC343.19_G1	lsb6	2707	6.45315	-0.063938	0.450144	0.502267	0.995634	0	-0.0728199	0.566693	0.451576	0.635177	0	0.0840538	0.789572	0.374229	0.581041	0
G1	_	SPAC343.20	SPAC343.20_G1		2010	3.42588	-0.183204	0.507705	0.476134	0.995634	0	0.299437	1.40788	0.235408	0.416398	0	0.0964549	0.14645	0.701951	0.834908	0
G1	_	SPAC343.21	SPAC343.21_G1		2592	3.42664	0.107373	0.211175	0.645848	0.995634	0	0.161873	0.467299	0.494232	0.67239	0	0.268394	1.3499	0.245295	0.451383	0
G1	_	SPCC191.08	SPCC191.08_G1	lto1	936	6.24161	0.105334	0.970671	0.324513	0.978335	0	0.275022	6.56922	0.0103758	0.0418401	1	0.12494	1.3619	0.243208	0.448818	0
G1	_	SPAC3A11.02	SPAC3A11.02_G1	cps3	2282	6.67367	-0.0557697	0.227125	0.633664	0.995634	0	-0.00636055	0.00291693	0.956928	0.978371	0	-0.0954386	0.66052	0.416377	0.619229	0
G1	_	SPAC3A11.03	SPAC3A11.03_G1	efm3	3532	4.02658	0.250576	1.92055	0.165796	0.919597	0	0.263237	2.03879	0.153331	0.312293	0	0.225213	1.53778	0.214948	0.412873	0
G1	_	SPAC3A11.04	SPAC3A11.04_G1	sei1	3394	4.49164	0.0257075	0.0246347	0.875281	0.995634	0	0.0978895	0.347896	0.555307	0.720676	0	0.209627	1.68173	0.194694	0.388013	0
G1	_	SPAC3A11.05c	SPAC3A11.05c_G1	kms1	2969	5.24498	-0.199389	1.96548	0.160928	0.919597	0	0.234538	2.79495	0.0945618	0.223814	0	0.0454062	0.105294	0.745567	0.862079	0
G1	_	SPAC3A11.06	SPAC3A11.06_G1	mvp1	2234	6.03508	0.0276535	0.0525764	0.818639	0.995634	0	0.125844	1.07554	0.299697	0.487465	0	0.0983671	0.668878	0.413443	0.616754	0
G1	_	SPAC3A11.07	SPAC3A11.07_G1	nde1	2504	6.86263	0.153045	0.850854	0.356311	0.983969	0	0.119495	0.514615	0.473148	0.652701	0	0.0573637	0.117787	0.731448	0.854653	0
G1	_	SPAC3A11.08	SPAC3A11.08_G1	cul4	2881	6.84142	0.131852	1.49174	0.221947	0.941733	0	0.160013	2.17013	0.140714	0.294935	0	-0.0146682	0.0182667	0.89249	0.943916	0
G1	_	SPAC3A11.09	SPAC3A11.09_G1	sod22	2804	6.18641	-0.0705485	0.379342	0.537956	0.995634	0	-0.397158	11.3544	0.000752697	0.00500759	-1	-0.458029	15.3548	8.90935e-05	0.000962671	-1
G1	_	SPCC306.09c	SPCC306.09c_G1	cap1	2528	7.70291	-0.193409	3.6612	0.0556934	0.705098	0	-0.276291	7.36516	0.00664997	0.0291436	-1	-0.273667	7.29723	0.00690609	0.0353797	-1
G1	_	SPAC3A11.10c	SPAC3A11.10c_G1	dpe1	1731	6.93711	0.0750572	0.161555	0.687729	0.995634	0	-0.160682	0.734314	0.391488	0.581089	0	-0.186393	0.98925	0.319926	0.530097	0
G1	_	SPAC3A11.11c	SPAC3A11.11c_G1		1820	6.61574	0.0394552	0.182007	0.669654	0.995634	0	-0.345441	12.9978	0.000311849	0.00238424	-1	-0.187341	3.98987	0.0457747	0.145472	0
G1	_	SPAC3A11.12c	SPAC3A11.12c_G1	rpt5	1903	8.11479	0.0344482	0.123293	0.72549	0.995634	0	-0.357098	12.9373	0.000322099	0.00243791	-1	-0.238429	5.83739	0.015689	0.0662555	0
G1	_	SPAC3A11.13	SPAC3A11.13_G1	pfd6	429	5.97815	-0.10598	0.561331	0.453724	0.995634	0	0.269941	3.67789	0.0551386	0.149285	0	0.206147	2.16107	0.141546	0.311958	0
G1	_	SPCC330.01c	SPCC330.01c_G1	rhp16	4327	7.96389	-0.123626	1.93506	0.164206	0.919597	0	-0.337835	14.1246	0.000171094	0.00142208	-1	-0.266963	8.95439	0.00276804	0.0171585	-1
G1	_	SPCC338.10c	SPCC338.10c_G1	cox5	973	6.3759	0.25616	2.89076	0.0890886	0.809157	0	0.498475	10.9458	0.000938179	0.00604272	1	0.332936	4.87666	0.0272223	0.100769	0
G1	_	SPAC3A12.02	SPAC3A12.02_G1		990	6.02143	-0.0255384	0.0355189	0.850512	0.995634	0	0.146446	1.1604	0.281383	0.466639	0	0.225068	2.79104	0.0947925	0.238943	0
G1	_	SPAC3A12.03c	SPAC3A12.03c_G1	meu34	1141	5.67362	0.168764	1.84137	0.17479	0.919597	0	-0.000620807	2.39886e-05	0.996092	0.998003	0	0.161433	1.67906	0.195049	0.388424	0
G1	_	SPAC3A12.04c	SPAC3A12.04c_G1	rpp1	708	5.35381	0.138187	0.8986	0.343157	0.983844	0	0.0491291	0.109615	0.740582	0.852697	0	0.185352	1.60977	0.204524	0.399673	0
G1	_	SPAC3A12.05c	SPAC3A12.05c_G1	taf2	3721	7.04883	-0.0824469	0.59998	0.438586	0.995634	0	-0.195478	3.29423	0.0695237	0.177911	0	-0.13117	1.51046	0.219069	0.419208	0
G1	_	SPAC3A12.06c	SPAC3A12.06c_G1		2777	6.5251	-0.0716382	0.394166	0.530118	0.995634	0	-0.101645	0.777345	0.377954	0.567475	0	-0.0360558	0.0999198	0.751926	0.865281	0
G1	_	SPAC3A12.07	SPAC3A12.07_G1	rpb11	814	6.7199	0.0391828	0.180651	0.670814	0.995634	0	-0.279415	8.67136	0.0032325	0.0163109	-1	-0.356834	14.3198	0.000154235	0.00155151	-1
G1	_	SPAC3A12.08	SPAC3A12.08_G1		1232	5.25582	0.146454	0.930514	0.334729	0.982694	0	-0.0552787	0.12648	0.72211	0.839603	0	-0.0917654	0.354569	0.551538	0.726611	0
G1	_	SPCC338.11c	SPCC338.11c_G1	efm2	1210	6.27197	0.203325	3.94607	0.0469811	0.659382	0	0.300698	8.49031	0.00357042	0.0176605	1	0.223989	4.78153	0.0287665	0.105058	0
G1	_	SPAC3A12.10	SPAC3A12.10_G1	rpl2001	720	7.72981	-0.0373177	0.109892	0.740267	0.995634	0	-0.152905	1.81894	0.177439	0.34417	0	-0.172417	2.32777	0.127083	0.289625	0
G1	_	SPAC3A12.11c	SPAC3A12.11c_G1	cwf2	1311	6.70993	0.0351534	0.0965049	0.756065	0.995634	0	0.326051	8.35812	0.00383967	0.0187117	1	0.0770068	0.464332	0.495606	0.685795	0
G1	_	SPAC3A12.12	SPAC3A12.12_G1	atp11	1333	6.46533	0.00928615	0.00755634	0.930729	0.995634	0	-0.125514	1.33444	0.248017	0.430722	0	-0.153233	2.024	0.154831	0.331876	0
G1	_	SPAC3A12.13c	SPAC3A12.13c_G1	tif310	1251	7.52147	0.0917234	0.914899	0.338818	0.983498	0	0.0286179	0.087771	0.76703	0.868313	0	0.0188949	0.0385082	0.844426	0.916426	0
G1	_	SPCC417.07c	SPCC417.07c_G1	mto1	3823	7.03448	-0.0601907	0.38964	0.532489	0.995634	0	-0.270236	7.58789	0.00587617	0.0263608	-1	-0.232187	5.71576	0.0168132	0.0698731	0
G1	_	SPAC3A12.14	SPAC3A12.14_G1	cam1	1550	7.86443	0.0484998	0.257503	0.611841	0.995634	0	-0.179376	3.45164	0.0631889	0.166179	0	-0.210181	4.7698	0.0289632	0.105653	0
G1	_	SPAC3A12.15	SPAC3A12.15_G1	vps53	2807	7.11201	0.0649464	0.502064	0.478595	0.995634	0	-0.0495435	0.284052	0.594058	0.750597	0	-0.0602624	0.426636	0.513644	0.698355	0
G1	_	SPAC3A12.16c	SPAC3A12.16c_G1	tim17	1399	6.15199	0.0224061	0.0411897	0.839172	0.995634	0	0.0383056	0.117557	0.731699	0.845753	0	-0.1331	1.42109	0.233224	0.437609	0
G1	_	SPAC3A12.17c	SPAC3A12.17c_G1	cys12	1506	4.41615	0.24524	1.94815	0.162786	0.919597	0	0.050142	0.0767675	0.781727	0.875931	0	0.199719	1.2785	0.258179	0.46555	0
G1	_	SPAC3A12.18	SPAC3A12.18_G1	zwf1	1973	7.6784	0.0434507	0.238822	0.625058	0.995634	0	-0.436759	23.0846	1.55029e-06	2.23349e-05	-1	-0.405805	20.1938	6.99803e-06	9.94482e-05	-1
G1	_	SPAC3A12.19	SPAC3A12.19_G1	mrpl27	598	3.90679	0.132669	0.582395	0.445375	0.995634	0	0.0637766	0.126046	0.722567	0.839823	0	0.178875	1.06935	0.301092	0.50934	0
G1	_	SPAC3C7.01c	SPAC3C7.01c_G1	sac12	2238	7.43194	-0.0591356	0.393478	0.530477	0.995634	0	0.0441629	0.217679	0.640814	0.785291	0	0.171988	3.36567	0.0665687	0.189372	0
G1	_	SPAC3C7.02c	SPAC3C7.02c_G1	pil2	1152	4.47446	0.00265619	0.000242647	0.987572	0.9991	0	-0.153486	0.754183	0.385155	0.574843	0	0.0576816	0.113526	0.736165	0.857306	0
G1	_	SPAC3C7.03c	SPAC3C7.03c_G1	rad55	1419	5.23115	-0.103957	0.660754	0.416294	0.995634	0	-0.0527585	0.165258	0.684361	0.814187	0	0.0376589	0.0884124	0.766205	0.87213	0
G1	_	SPAC3C7.04	SPAC3C7.04_G1		3060	7.22691	-0.0102027	0.0106087	0.917964	0.995634	0	-0.015281	0.0234285	0.878348	0.933934	0	0.108915	1.21417	0.270508	0.477945	0
G1	_	SPAC3C7.05c	SPAC3C7.05c_G1	mug191	1901	6.3127	0.197885	3.10106	0.0782413	0.789928	0	-0.268353	5.34779	0.0207486	0.0714222	0	-0.298011	6.7229	0.00951826	0.0453274	-1
G1	_	SPAC3C7.06c	SPAC3C7.06c_G1	pit1	3085	5.67288	-0.0627811	0.192687	0.66069	0.995634	0	0.0600406	0.174405	0.676226	0.807029	0	0.275327	3.80439	0.0511183	0.157193	0
G1	_	SPAC3C7.07c	SPAC3C7.07c_G1	ate1	1508	6.69633	-0.0194359	0.037273	0.84691	0.995634	0	0.135401	1.79328	0.180527	0.348433	0	0.120315	1.44002	0.230136	0.433633	0
G1	_	SPAC3C7.08c	SPAC3C7.08c_G1	elf1	3464	8.52366	0.00460791	0.00242679	0.96071	0.995634	0	0.499947	28.7163	8.37948e-08	1.55828e-06	1	0.391936	17.6858	2.60558e-05	0.000323992	1
G1	_	SPAC3C7.09	SPAC3C7.09_G1	set8	1535	4.97013	0.0233807	0.0289356	0.864928	0.995634	0	0.0515628	0.136201	0.712088	0.833319	0	-0.11646	0.699835	0.402839	0.607136	0
G1	_	SPAC3C7.10	SPAC3C7.10_G1	pex13	1468	6.02007	0.0502262	0.194208	0.659437	0.995634	0	-0.134068	1.32273	0.250102	0.432741	0	-0.164928	2.04202	0.153007	0.328839	0
G1	_	SPAC3C7.11c	SPAC3C7.11c_G1	cnx1	2187	9.86537	-0.0549464	0.279908	0.596761	0.995634	0	-0.479066	21.0553	4.46212e-06	5.76579e-05	-1	-0.468298	20.1385	7.20338e-06	0.000101904	-1
G1	_	SPAC3C7.12	SPAC3C7.12_G1	tip1	2075	7.06785	0.000208069	5.10384e-06	0.998197	0.999966	0	0.204766	4.91993	0.0265486	0.0863415	0	0.180712	3.89299	0.048488	0.151407	0
G1	_	SPCC4G3.18	SPCC4G3.18_G1	rix1	2804	8.0786	0.00824649	0.00787556	0.929285	0.995634	0	0.262335	7.97096	0.00475337	0.0222974	1	0.162831	3.07959	0.0792806	0.21315	0
G1	_	SPCC550.09	SPCC550.09_G1	pex32	2093	4.99331	-0.37918	9.67232	0.00187065	0.209346	0	-0.313578	6.38867	0.0114851	0.0451269	-1	-0.304707	6.32434	0.0119092	0.053849	0
G1	_	SPAC3C7.13c	SPAC3C7.13c_G1		3731	6.06283	0.244082	5.73827	0.0165991	0.495947	0	-0.0866825	0.6716	0.412494	0.599792	0	-0.131558	1.58575	0.207934	0.404445	0
G1	_	SPAC3C7.14c	SPAC3C7.14c_G1	obr1	957	8.56943	0.127125	0.614507	0.433096	0.995634	0	0.465715	8.23289	0.00411379	0.0198164	1	0.274375	2.84655	0.0915703	0.23353	0
G1	_	SPAC3F10.02c	SPAC3F10.02c_G1	trk1	3099	6.62708	-0.155775	2.17627	0.140154	0.905888	0	-0.0511214	0.231712	0.630257	0.777218	0	0.00895637	0.00728118	0.931999	0.962881	0
G1	_	SPAC3F10.03	SPAC3F10.03_G1	grs1	2319	7.91557	-0.0140364	0.0127142	0.910223	0.995634	0	-0.131222	1.09925	0.29443	0.481523	0	-0.153424	1.50713	0.219578	0.420053	0
G1	_	SPCC550.14	SPCC550.14_G1	vgl1	4614	8.93165	-0.315064	6.8068	0.00908113	0.375677	0	-0.322479	7.11836	0.00762986	0.0327959	-1	-0.305991	6.42239	0.011269	0.0518905	0
G1	_	SPAC3F10.04	SPAC3F10.04_G1	gsa1	3887	7.87496	0.0269748	0.0758095	0.783059	0.995634	0	0.131957	1.80355	0.179284	0.346888	0	0.0498599	0.258692	0.61102	0.771718	0
G1	_	SPAC3F10.05c	SPAC3F10.05c_G1	mug113	1431	6.25211	0.0618191	0.344638	0.557164	0.995634	0	0.202491	3.66141	0.0556864	0.150296	0	0.175414	2.80376	0.0940438	0.23813	0
G1	_	SPAC3F10.06c	SPAC3F10.06c_G1	rit1	1362	5.62773	0.0133996	0.00969688	0.921557	0.995634	0	0.085951	0.391992	0.531254	0.703141	0	-0.00180957	0.000175069	0.989443	0.994628	0
G1	_	SPAC3F10.07c	SPAC3F10.07c_G1	erf4	519	3.41956	-0.21274	0.68748	0.407023	0.992709	0	-0.187581	0.520341	0.470696	0.651038	0	-0.383988	2.18198	0.139635	0.30911	0
G1	_	SPAC3F10.08c	SPAC3F10.08c_G1	faf1	1324	5.83105	-0.0536806	0.160291	0.688889	0.995634	0	0.518275	15.4384	8.5239e-05	0.00076973	1	0.25441	3.68214	0.0549983	0.16547	0
G1	_	SPCC576.09	SPCC576.09_G1	rps20	514	8.67759	0.150979	1.24163	0.265157	0.954461	0	0.407867	9.00767	0.00268849	0.014123	1	0.25586	3.5581	0.0592554	0.17459	0
G1	_	SPAC3F10.10c	SPAC3F10.10c_G1	map3	2888	5.32225	-0.0366492	0.0668933	0.795915	0.995634	0	0.0228648	0.0254799	0.873177	0.930646	0	0.0178149	0.0157894	0.900004	0.948432	0
G1	_	SPAC3F10.11c	SPAC3F10.11c_G1	abc2	4700	8.87308	-0.0425301	0.189687	0.663177	0.995634	0	-0.360578	13.4333	0.000247191	0.00196343	-1	-0.314509	10.2893	0.00133803	0.00963079	-1
G1	_	SPAC3F10.12c	SPAC3F10.12c_G1		1572	5.98961	-0.0193761	0.0227627	0.880076	0.995634	0	0.0229177	0.0313323	0.859501	0.921083	0	0.114332	0.800896	0.370826	0.579109	0
G1	_	SPAC3F10.13	SPAC3F10.13_G1	ucp6	2681	7.09463	-0.0287736	0.0882358	0.766432	0.995634	0	-0.500096	25.2154	5.12704e-07	8.19673e-06	-1	-0.412274	17.5387	2.81512e-05	0.000348664	-1
G1	_	SPAC3F10.15c	SPAC3F10.15c_G1	spo12	3797	4.25782	-0.276096	2.48475	0.114955	0.868894	0	0.242049	2.0175	0.155495	0.31527	0	0.096703	0.326517	0.567717	0.738319	0
G1	_	SPAC3F10.16c	SPAC3F10.16c_G1		2057	6.95691	0.106517	1.14733	0.28411	0.966686	0	0.660181	45.1754	1.80155e-11	6.4887e-10	1	0.525352	28.6564	8.64294e-08	1.92076e-06	1
G1	_	SPAC3F10.17	SPAC3F10.17_G1	ltv1	1613	6.85814	0.060817	0.363976	0.546306	0.995634	0	0.788976	63.7984	1.37824e-15	8.72469e-14	1	0.57862	34.2698	4.79772e-09	1.41161e-07	1
G1	_	SPAC3F10.18c	SPAC3F10.18c_G1	rpl4102	249	9.94901	0.0245165	0.045656	0.830802	0.995634	0	-0.0753423	0.429095	0.512433	0.687285	0	0.0535191	0.217379	0.641044	0.794513	0
G1	_	SPAC3F10.19	SPAC3F10.19_G1	spd2	1024	6.95341	-0.070544	0.199295	0.65529	0.995634	0	-0.413631	6.72077	0.00952967	0.0390854	-1	-0.257017	2.64278	0.104021	0.255248	0
G1	_	SPCC594.01	SPCC594.01_G1	duc1	5049	7.05914	-0.299101	8.85632	0.00292075	0.244058	0	-0.276862	7.47053	0.00627169	0.0278362	-1	-0.222084	4.89964	0.0268623	0.099791	0
G1	_	SPAC3G6.01	SPAC3G6.01_G1	hrp3	4533	7.85897	-0.153423	1.8626	0.172325	0.919597	0	-0.0503958	0.200038	0.65469	0.794297	0	-0.099444	0.783063	0.376206	0.582855	0
G1	_	SPAC3G6.02	SPAC3G6.02_G1	rpn15	653	7.53527	0.0266381	0.0705146	0.790589	0.995634	0	0.0219035	0.0470368	0.828302	0.903658	0	0.0738497	0.540817	0.462094	0.656677	0
G1	_	SPAC3G6.03c	SPAC3G6.03c_G1		1384	5.97725	0.188679	1.7683	0.183592	0.919597	0	0.527663	13.9555	0.000187188	0.00153951	1	0.408628	8.41665	0.00371801	0.0217968	1
G1	_	SPAC3G6.04	SPAC3G6.04_G1	rnp24	1375	5.98906	-0.115133	1.02878	0.310446	0.973039	0	0.832054	59.4132	1.27809e-14	7.15159e-13	1	0.583624	28.9739	7.33603e-08	1.69025e-06	1
G1	_	SPAC3G6.05	SPAC3G6.05_G1		1605	5.9796	-0.0304083	0.0757103	0.783197	0.995634	0	-0.405638	12.567	0.000392613	0.00288791	-1	-0.69532	36.45	1.56636e-09	5.00837e-08	-1
G1	_	SPAC3G6.06c	SPAC3G6.06c_G1	rad2	1483	4.58933	-0.147595	0.961325	0.326853	0.978887	0	-0.125912	0.675087	0.411284	0.598632	0	-0.179381	1.40786	0.235413	0.439508	0
G1	_	SPAC3G6.07	SPAC3G6.07_G1		708	1.93323	-0.682853	1.72899	0.188539	0.920373	0	-0.737677	1.96013	0.161499	0.323392	0	-0.389925	0.575214	0.448194	0.644871	0
G1	_	SPAC3G6.08	SPAC3G6.08_G1	erv1	1036	5.86609	0.201384	1.90737	0.167256	0.919597	0	-0.0450531	0.0924016	0.761146	0.865068	0	-0.0491985	0.111951	0.737934	0.858321	0
G1	_	SPAC3G6.09c	SPAC3G6.09c_G1	tps2	2925	6.81997	-0.175014	2.53932	0.111043	0.862289	0	0.0470888	0.183939	0.66801	0.801381	0	0.114274	1.10352	0.293495	0.500772	0
G1	_	SPAC3G6.10c	SPAC3G6.10c_G1	vps51	854	4.55811	-0.299494	3.59826	0.0578401	0.710752	0	-0.129185	0.663242	0.415418	0.602365	0	-0.0518812	0.11242	0.737405	0.858282	0
G1	_	SPAC3G6.11	SPAC3G6.11_G1	chl1	3608	6.35333	-0.00794605	0.00463579	0.945717	0.995634	0	0.236415	4.10887	0.0426589	0.122973	0	0.235632	4.14806	0.0416823	0.136124	0
G1	_	SPAC3G6.13c	SPAC3G6.13c_G1	rpl4101	376	10.1595	0.0174397	0.0244716	0.875691	0.995634	0	-0.104781	0.878872	0.348511	0.538846	0	0.0462287	0.171708	0.678598	0.820049	0
G1	_	SPAC3G9.01	SPAC3G9.01_G1	nsk1	1861	4.70186	-0.145982	0.585162	0.444296	0.995634	0	0.12393	0.424713	0.514595	0.689095	0	0.0228616	0.0145826	0.903882	0.95054	0
G1	_	SPAC3G9.02	SPAC3G9.02_G1	oar2	739	5.6894	-0.0548122	0.176067	0.674775	0.995634	0	0.0791447	0.36233	0.547215	0.713417	0	-0.0407191	0.0966223	0.755921	0.86819	0
G1	_	SPCC622.13c	SPCC622.13c_G1	tti1	4723	7.033	-0.168482	2.65703	0.103093	0.847879	0	-0.331637	10.0004	0.00156509	0.00898209	-1	-0.257816	6.17291	0.0129721	0.057291	0
G1	_	SPAC3G9.04	SPAC3G9.04_G1	ssu72	977	3.46037	0.00518363	0.000535986	0.98153	0.9991	0	-0.242488	1.08332	0.297955	0.48564	0	-0.0108508	0.00237538	0.961128	0.97919	0
G1	_	SPAC3G9.05	SPAC3G9.05_G1	spa2	2649	5.93629	-0.0371072	0.0699493	0.791411	0.995634	0	0.201727	2.07106	0.150117	0.307747	0	0.173653	1.55034	0.213085	0.410514	0
G1	_	SPAC3G9.06	SPAC3G9.06_G1	frs2	1619	8.69829	0.0672539	0.558436	0.454891	0.995634	0	-0.0422825	0.218649	0.640071	0.784841	0	-0.0535131	0.351515	0.553257	0.727194	0
G1	_	SPAC3G9.07c	SPAC3G9.07c_G1	hos2	1835	5.25827	0.199898	2.42434	0.119463	0.87976	0	0.171269	1.71225	0.190694	0.361734	0	0.0846688	0.427173	0.513379	0.698355	0
G1	_	SPAC3G9.08	SPAC3G9.08_G1	png1	1516	4.24197	0.0610878	0.0994293	0.752516	0.995634	0	0.479866	6.31758	0.0119546	0.0465051	1	0.461896	5.99893	0.0143145	0.0616982	0
G1	_	SPAC3G9.09c	SPAC3G9.09c_G1	tif211	1138	8.45358	0.0995099	1.02227	0.31198	0.973112	0	-0.0475647	0.231067	0.630734	0.777347	0	-0.07764	0.617771	0.431877	0.632376	0
G1	_	SPCC663.10	SPCC663.10_G1	trm44	2812	9.96816	0.1788	2.49692	0.11407	0.867479	0	0.298752	6.95017	0.00838113	0.0351825	1	0.406884	12.9083	0.00032712	0.00296252	1
G1	_	SPAC3G9.11c	SPAC3G9.11c_G1	pdc201	2493	3.21525	0.408683	3.23524	0.0720698	0.775505	0	-0.189086	0.582814	0.445212	0.629119	0	0.137021	0.342695	0.558278	0.731339	0
G1	_	SPAC3G9.12	SPAC3G9.12_G1	peg1	5346	7.64226	0.00285432	0.00071975	0.978597	0.9991	0	0.136809	1.6427	0.199956	0.372842	0	0.163476	2.36812	0.123836	0.285428	0
G1	_	SPAC3G9.13c	SPAC3G9.13c_G1	msw1	6404	6.01806	0.141754	1.98354	0.159018	0.919597	0	-0.154372	2.1863	0.139243	0.293127	0	-0.297274	8.19789	0.0041939	0.0239592	-1
G1	_	SPAC3G9.14	SPAC3G9.14_G1	sak1	3539	7.24292	-0.155459	1.91505	0.166404	0.919597	0	-0.214404	3.58749	0.058216	0.155848	0	-0.216329	3.68977	0.054747	0.164872	0
G1	_	SPAC3G9.15c	SPAC3G9.15c_G1	fcf2	693	4.98359	-0.186348	1.08751	0.297024	0.970858	0	0.593622	11.8158	0.000587299	0.00404427	1	0.591913	11.9699	0.000540655	0.00454194	1
G1	_	SPAC3G9.16c	SPAC3G9.16c_G1	bet5	468	3.28003	-0.181399	0.563783	0.45274	0.995634	0	-0.0685314	0.078948	0.778728	0.874401	0	0.0471535	0.0396538	0.842159	0.915492	0
G1	_	SPAC3G9.17	SPAC3G9.17_G1	ppt2	399	4.05906	0.0425053	0.0610716	0.80481	0.995634	0	0.206775	1.42815	0.232067	0.412735	0	0.033795	0.0385371	0.844368	0.916426	0
G1	_	SPAC3H1.01c	SPAC3H1.01c_G1	orc3	2453	7.10479	-0.0964012	0.921269	0.337142	0.982694	0	0.00186658	0.000341993	0.985246	0.993001	0	-0.0169558	0.0286141	0.865673	0.928753	0
G1	_	SPAC3H1.02c	SPAC3H1.02c_G1	sdd3	3464	7.41997	-0.00867101	0.008514	0.926482	0.995634	0	-0.431946	20.2498	6.79591e-06	8.50099e-05	-1	-0.509248	28.3154	1.03074e-07	2.24293e-06	-1
G1	_	SPAC3H1.03	SPAC3H1.03_G1	mug151	944	4.90124	-0.0317991	0.0456059	0.830894	0.995634	0	-0.125465	0.676728	0.410716	0.598471	0	-0.228066	2.27406	0.131555	0.296546	0
G1	_	SPAC3H1.04c	SPAC3H1.04c_G1	mdm31	2248	7.29335	0.139656	1.96183	0.161318	0.919597	0	0.0613248	0.370789	0.542575	0.711091	0	0.0185195	0.0341488	0.853391	0.922241	0
G1	_	SPCC737.07c	SPCC737.07c_G1		2492	6.80911	0.181982	3.93226	0.0473681	0.659932	0	0.33321	13.08	0.000298468	0.00229791	1	0.278554	9.27698	0.00232051	0.0149156	1
G1	_	SPCC777.10c	SPCC777.10c_G1	ubc12	752	4.36139	0.314904	3.42783	0.0641064	0.745189	0	0.437939	6.53265	0.0105912	0.042527	1	0.217803	1.60839	0.204719	0.399805	0
G1	_	SPAC3H1.06c	SPAC3H1.06c_G1		4109	6.91732	-0.133158	2.08294	0.148953	0.910723	0	-0.0959888	1.06234	0.302682	0.490918	0	-0.0358851	0.151861	0.696763	0.832687	0
G1	_	SPAC3H1.07	SPAC3H1.07_G1	aru1	1242	6.57929	-0.130154	1.70328	0.191859	0.920373	0	-0.590063	32.5207	1.17931e-08	2.61157e-07	-1	-0.650639	40.0439	2.48319e-10	9.43163e-09	-1
G1	_	SPAC3H1.08c	SPAC3H1.08c_G1		880	5.41281	0.124646	1.05426	0.304527	0.970858	0	0.0762125	0.377465	0.538963	0.708555	0	0.151438	1.56028	0.211624	0.408546	0
G1	_	SPAC3H1.09c	SPAC3H1.09c_G1	avt3	2548	8.04562	-0.0262773	0.0796527	0.777769	0.995634	0	0.234311	6.33303	0.011851	0.0461878	1	0.228831	6.08624	0.0136239	0.0594161	0
G1	_	SPAC3H1.10	SPAC3H1.10_G1	pcs2	2265	5.76575	-0.0983872	0.706484	0.400613	0.991347	0	0.144502	1.52744	0.216496	0.393613	0	0.115889	1.00488	0.316132	0.526775	0
G1	_	SPCC794.11c	SPCC794.11c_G1	ent3	2118	6.81942	-0.237259	5.70308	0.0169352	0.495947	0	-0.415662	16.8641	4.01549e-05	0.000398594	-1	-0.204534	4.24231	0.0394285	0.131226	0
G1	_	SPAC3H1.12c	SPAC3H1.12c_G1	snt2	4414	6.04424	0.0167996	0.0264658	0.870768	0.995634	0	0.313597	9.32869	0.00225594	0.0122407	1	0.287385	8.03741	0.00458211	0.0257543	1
G1	_	SPAC3H1.13	SPAC3H1.13_G1	ppk13	1245	5.73113	0.0947474	0.59584	0.44017	0.995634	0	0.347375	8.04564	0.00456132	0.0215851	1	0.315246	6.76304	0.0093065	0.044397	1
G1	_	SPAC3H1.14	SPAC3H1.14_G1	gid4	1183	5.15839	-0.208044	1.9452	0.163105	0.919597	0	0.347825	5.68328	0.0171273	0.0613004	0	0.183653	1.58772	0.207652	0.40425	0
G1	_	SPAC3H5.04	SPAC3H5.04_G1	aar2	2167	5.4264	-0.218696	2.29679	0.129642	0.889217	0	0.00516782	0.00128139	0.971445	0.98682	0	0.182879	1.67826	0.195156	0.388514	0
G1	_	SPAC3H5.05c	SPAC3H5.05c_G1	rps1401	640	5.37385	-0.0470377	0.123608	0.725154	0.995634	0	0.0544055	0.162716	0.686668	0.81611	0	0.0359308	0.0723699	0.787917	0.886226	0
G1	_	SPAC3H5.06c	SPAC3H5.06c_G1	pol1	5190	7.6114	-0.169478	2.49326	0.114335	0.867479	0	0.119854	1.25144	0.263277	0.447872	0	0.146647	1.89454	0.168691	0.351484	0
G1	_	SPAC3H5.07	SPAC3H5.07_G1	rpl702	1108	7.98297	0.0471766	0.151709	0.696907	0.995634	0	0.365389	9.09212	0.00256713	0.013637	1	0.347662	8.26548	0.0040406	0.0232957	1
G1	_	SPAC3H5.08c	SPAC3H5.08c_G1	wdr44	3349	6.5374	-0.0607044	0.274937	0.600039	0.995634	0	0.287194	6.21417	0.0126731	0.0484284	1	0.149474	1.68903	0.193729	0.386779	0
G1	_	SPAC3H5.09c	SPAC3H5.09c_G1	hob2	8519	8.11644	-0.00819255	0.00693078	0.933652	0.995634	0	0.0103301	0.0109394	0.9167	0.956952	0	0.0732865	0.55538	0.456128	0.650558	0
G1	_	SPAC3H5.10	SPAC3H5.10_G1	rpl3202	692	10.1497	0.0739279	0.50276	0.47829	0.995634	0	-0.0234577	0.0504589	0.822267	0.9009	0	-0.0197931	0.0359483	0.849622	0.9193	0
G1	_	SPAC3H5.11	SPAC3H5.11_G1		2292	5.47557	-0.129078	1.18337	0.276672	0.963832	0	-0.148555	1.50925	0.219254	0.396899	0	-0.205902	2.97842	0.0843815	0.222473	0
G1	_	SPAC3H5.12c	SPAC3H5.12c_G1	rpl501	973	9.57384	0.0245179	0.0454652	0.831151	0.995634	0	0.1871	2.64306	0.104003	0.240158	0	0.149255	1.68155	0.194718	0.388013	0
G1	_	SPCC830.10	SPCC830.10_G1	ham1	1103	7.09442	0.126151	1.8082	0.178725	0.919597	0	0.331958	12.4813	0.000411046	0.00299887	1	0.321877	11.9041	0.000560114	0.00466786	1
G1	_	SPAC3H5.13	SPAC3H5.13_G1	new4	441	4.61119	-0.0213584	0.0186855	0.891272	0.995634	0	0.592561	15.4927	8.28249e-05	0.000750636	1	0.519087	12.1791	0.000483276	0.00412573	1
G1	_	SPAC3H8.02	SPAC3H8.02_G1	csr102	2209	7.01721	-0.1197	0.937784	0.332848	0.981167	0	-0.18097	2.11325	0.146029	0.302533	0	-0.213483	2.95389	0.0856713	0.224977	0
G1	_	SPAC3H8.03	SPAC3H8.03_G1	img2	1291	5.15939	0.109784	0.377496	0.538947	0.995634	0	0.0686753	0.143574	0.704754	0.828024	0	0.258906	2.11924	0.145459	0.318516	0
G1	_	SPAC3H8.04	SPAC3H8.04_G1		1681	7.71958	0.126421	1.6359	0.200889	0.929814	0	-0.299107	8.87073	0.00289779	0.0149346	-1	-0.276617	7.66963	0.00561579	0.0298762	-1
G1	_	SPAC3H8.05c	SPAC3H8.05c_G1	mms1	3607	7.11625	-0.298633	6.27987	0.0122117	0.422156	0	-0.0923425	0.600205	0.4385	0.622441	0	0.0115764	0.00957482	0.922051	0.958871	0
G1	_	SPAC3H8.06	SPAC3H8.06_G1	aur1	2333	5.97671	-0.10059	0.539265	0.462737	0.995634	0	-0.122933	0.788727	0.374485	0.563887	0	-0.106688	0.603832	0.43712	0.636041	0
G1	_	SPAC3H8.07c	SPAC3H8.07c_G1	pfd3	831	5.64178	-0.0143314	0.011453	0.914774	0.995634	0	0.0288907	0.0455002	0.831087	0.904832	0	0.0456592	0.116284	0.7331	0.854912	0
G1	_	SPAC3H8.08c	SPAC3H8.08c_G1		2146	5.96703	0.0762109	0.409773	0.522085	0.995634	0	0.0737227	0.373957	0.540855	0.71	0	0.130633	1.20569	0.272187	0.479965	0
G1	_	SPAC3H8.09c	SPAC3H8.09c_G1	nab3	3294	6.00998	0.0393528	0.0855679	0.769889	0.995634	0	-0.257015	3.49631	0.0615059	0.16264	0	-0.266051	3.78926	0.0515824	0.158464	0
G1	_	SPAC3H8.10	SPAC3H8.10_G1	spo20	1504	7.79509	-0.0930169	0.694056	0.404788	0.99251	0	-0.0340232	0.0923423	0.76122	0.865068	0	-0.0605815	0.294066	0.587627	0.752242	0
G1	_	SPAC458.02c	SPAC458.02c_G1		1667	9.13063	-0.0624753	0.426741	0.513592	0.995634	0	0.100788	1.10877	0.292349	0.479495	0	-0.0289449	0.0915995	0.762153	0.870189	0
G1	_	SPAC458.03	SPAC458.03_G1	tel2	3512	6.80882	0.0427607	0.20446	0.651145	0.995634	0	0.118565	1.54824	0.213395	0.389671	0	0.118815	1.58228	0.208433	0.404537	0
G1	_	SPAC458.04c	SPAC458.04c_G1	dli1	1315	4.54106	0.17225	0.741021	0.389334	0.991043	0	0.359109	3.20107	0.0735901	0.186413	0	0.30191	2.27969	0.131078	0.295759	0
G1	_	SPAC458.05	SPAC458.05_G1	pik3	2627	6.77312	0.176415	2.79788	0.0943893	0.819925	0	0.142461	1.79186	0.180699	0.348551	0	-0.0176525	0.0276272	0.867988	0.930178	0
G1	_	SPAC458.06	SPAC458.06_G1	atg1803	1334	5.53463	0.126064	0.981246	0.321891	0.977529	0	-0.166605	1.6056	0.205111	0.379856	0	-0.116695	0.816201	0.366293	0.574896	0
G1	_	SPCC895.09c	SPCC895.09c_G1	ucp12	5527	7.76435	0.128192	2.09526	0.147757	0.909386	0	0.248757	7.84185	0.00510503	0.0236287	1	0.176595	3.97673	0.046133	0.146166	0
G1	_	SPAC458.07	SPAC458.07_G1	tfa1	1468	6.2695	-0.0159371	0.0177885	0.893898	0.995634	0	-0.00656493	0.00296331	0.956588	0.978371	0	-0.0650368	0.293257	0.588141	0.752681	0
G1	_	SPAC4A8.02c	SPAC4A8.02c_G1		2633	6.78278	0.0216926	0.0581761	0.809402	0.995634	0	-0.227094	6.05568	0.0138617	0.0520186	0	-0.140326	2.39025	0.122094	0.282372	0
G1	_	SPAC4A8.03c	SPAC4A8.03c_G1	ptc4	2488	5.53618	-0.06193	0.204638	0.651003	0.995634	0	-0.201053	2.07501	0.149729	0.307174	0	-0.151503	1.21203	0.27093	0.478421	0
G1	_	SPAC4A8.04	SPAC4A8.04_G1	isp6	2167	6.1305	-0.14956	0.407116	0.523437	0.995634	0	-0.427333	3.26369	0.0708295	0.180296	0	-0.515548	4.75743	0.029172	0.105983	0
G1	_	SPAC4A8.05c	SPAC4A8.05c_G1	myp2	6448	7.45052	-0.0387789	0.118291	0.730896	0.995634	0	0.311565	7.66824	0.00562013	0.0254858	1	0.261246	5.42989	0.019795	0.0797641	0
G1	_	SPCP20C8.01c	SPCP20C8.01c_G1		1126	4.37134	0.268281	2.69135	0.100895	0.842682	0	0.412453	6.27901	0.0122176	0.0471767	1	0.295671	3.28648	0.0698527	0.195432	0
G1	_	SPAC4A8.06c	SPAC4A8.06c_G1		2139	7.55239	0.0713366	0.466275	0.494706	0.995634	0	0.00168587	0.000256569	0.98722	0.9937	0	-0.18076	2.94705	0.0860345	0.225503	0
G1	_	SPAC4A8.07c	SPAC4A8.07c_G1	lcb4	1697	6.96476	0.0412671	0.145719	0.702661	0.995634	0	0.486931	20.5545	5.79582e-06	7.32307e-05	1	0.325509	9.22216	0.00239104	0.0152128	1
G1	_	SPAC4A8.08c	SPAC4A8.08c_G1	vrs2	3274	7.03231	-0.0455547	0.224808	0.6354	0.995634	0	0.107823	1.25293	0.262995	0.447512	0	0.0750087	0.612322	0.433915	0.633732	0
G1	_	SPAC4A8.09c	SPAC4A8.09c_G1	cwf21	1730	6.69563	-0.0259602	0.0420637	0.837498	0.995634	0	0.219587	3.01887	0.0823008	0.202823	0	0.103204	0.665177	0.414738	0.618107	0
G1	_	SPCPB16A4.03c	SPCPB16A4.03c_G1	ade10	2089	7.05554	-0.151556	1.74947	0.185943	0.919597	0	-0.307158	7.01407	0.00808718	0.0343144	-1	-0.140683	1.50289	0.220227	0.420642	0
G1	_	SPMITTRNAILE.01	SPMITTRNAILE.01_G1		73	4.80476	-0.288224	4.44626	0.0349777	0.611278	0	-0.44377	9.81181	0.00173394	0.00977215	-1	-0.442742	10.1702	0.0014273	0.0101416	-1
G1	_	SPAC4A8.11c	SPAC4A8.11c_G1	fas2	5760	9.70793	-0.276637	7.87829	0.00500319	0.304301	0	-0.157091	2.54019	0.110981	0.251635	0	-0.109026	1.22613	0.268161	0.475407	0
G1	_	SPAC4A8.12c	SPAC4A8.12c_G1	sds22	1427	6.82873	0.0144129	0.0189248	0.890582	0.995634	0	-0.270379	6.39655	0.0114342	0.0450964	-1	-0.19654	3.44895	0.063292	0.182679	0
G1	_	SPMITTRNALEU.02	SPMITTRNALEU.02_G1		74	4.82709	-0.281378	3.6714	0.0553536	0.705098	0	-0.402279	7.09598	0.0077257	0.0331169	-1	-0.391714	6.99246	0.0081854	0.0405079	-1
G1	_	SPAC4A8.13c	SPAC4A8.13c_G1	pts1	1211	8.29656	-0.0201451	0.0451981	0.83164	0.995634	0	-0.0510735	0.287688	0.591706	0.748902	0	0.0735512	0.602726	0.43754	0.636183	0
G1	_	SPAC4A8.14	SPAC4A8.14_G1		1695	7.73887	0.0557085	0.363298	0.54668	0.995634	0	0.184854	3.97802	0.0460978	0.130485	0	0.141838	2.35752	0.12468	0.286952	0
G1	_	SPAC4A8.15c	SPAC4A8.15c_G1	cdc3	454	8.89634	-0.0377498	0.138707	0.70957	0.995634	0	0.0104543	0.0105807	0.918072	0.957649	0	0.0753897	0.553828	0.456758	0.651161	0
G1	_	SPAC4A8.16c	SPAC4A8.16c_G1	tif303	2947	9.6609	-0.0125941	0.0205435	0.886029	0.995634	0	-0.222824	6.38307	0.0115214	0.0452411	-1	-0.29891	11.4888	0.000700173	0.00561123	-1
G1	_	SPAC4C5.01	SPAC4C5.01_G1	pud1	1228	5.57701	0.109319	0.731488	0.392401	0.991043	0	0.0771741	0.352968	0.552438	0.718284	0	0.165724	1.67983	0.194947	0.388345	0
G1	_	SPAC4C5.02c	SPAC4C5.02c_G1	ryh1	2232	6.52972	0.0188079	0.0422504	0.837143	0.995634	0	-0.184228	3.84421	0.0499181	0.138747	0	-0.206186	4.93349	0.0263411	0.0983788	0
G1	_	SPAC4C5.03	SPAC4C5.03_G1		1562	6.40178	0.0518834	0.242679	0.622278	0.995634	0	0.103771	0.952802	0.329007	0.521073	0	0.0894084	0.721454	0.395668	0.600545	0
G1	_	SPAC4C5.04	SPAC4C5.04_G1	rad31	1273	5.96111	-0.0324788	0.0657873	0.797572	0.995634	0	-0.143226	1.23633	0.26618	0.451218	0	-0.0720281	0.319201	0.572088	0.741833	0
G1	_	SPAC4D7.01c	SPAC4D7.01c_G1	sec71	5647	8.17924	-0.0697359	0.54894	0.458751	0.995634	0	0.129481	1.89006	0.169195	0.334599	0	0.17009	3.29066	0.0696749	0.195108	0
G1	_	SPAC4D7.02c	SPAC4D7.02c_G1	pgc1	1513	5.83791	0.133611	1.4534	0.227983	0.947294	0	-0.258077	5.00423	0.0252855	0.0833284	0	-0.329254	8.30486	0.00395392	0.0228802	-1
G1	_	SPAC4D7.03	SPAC4D7.03_G1	pop2	2585	6.47316	0.0654705	0.41331	0.520294	0.995634	0	0.13173	1.64582	0.199529	0.372379	0	0.019819	0.0376464	0.846155	0.916973	0
G1	_	SPAC4D7.04c	SPAC4D7.04c_G1	rer2	1268	6.63591	-0.0809279	0.580113	0.446268	0.995634	0	0.0950759	0.79608	0.372268	0.561663	0	0.191314	3.29454	0.0695107	0.194805	0
G1	_	SPAC4D7.05	SPAC4D7.05_G1	sum1	1213	9.43367	0.111011	1.39598	0.237398	0.947728	0	-0.0241672	0.0657343	0.797652	0.885449	0	-0.0742817	0.622322	0.430186	0.630907	0
G1	_	SPAC4D7.06c	SPAC4D7.06c_G1	met8	1140	5.05875	-0.0825729	0.336151	0.562059	0.995634	0	0.106866	0.559952	0.45428	0.636832	0	-0.0476434	0.112098	0.737768	0.858287	0
G1	_	SPAC4D7.07c	SPAC4D7.07c_G1	csi2	2474	6.3495	-0.0777619	0.481087	0.48793	0.995634	0	0.129081	1.32397	0.249882	0.432479	0	0.0101901	0.00833422	0.927261	0.961374	0
G1	_	SPAC4D7.08c	SPAC4D7.08c_G1	ade4	2177	8.48315	0.0434937	0.198144	0.656223	0.995634	0	0.0766931	0.612544	0.433832	0.618899	0	0.116373	1.41877	0.233605	0.438058	0
G1	_	SPAC4D7.09	SPAC4D7.09_G1	tif223	1657	7.73551	0.102964	1.19397	0.274529	0.963832	0	-0.129407	1.84151	0.174775	0.341006	0	-0.143583	2.28283	0.130813	0.295545	0
G1	_	SPAC4D7.10c	SPAC4D7.10c_G1	spt20	1947	3.91395	-0.126342	0.50712	0.476388	0.995634	0	0.114302	0.416743	0.518567	0.691832	0	-0.211544	1.39769	0.237112	0.44173	0
G1	_	SPAC4D7.11	SPAC4D7.11_G1	dsc4	1632	6.04854	0.135476	1.33593	0.247754	0.948234	0	0.112643	0.899734	0.342853	0.533915	0	0.266535	5.22868	0.0222174	0.0865358	0
G1	_	SPAC4D7.12c	SPAC4D7.12c_G1	fet5	1113	6.17916	-0.000209403	3.69962e-06	0.998465	0.999966	0	0.678098	40.5665	1.90033e-10	5.80944e-09	1	0.621291	34.5196	4.21978e-09	1.25333e-07	1
G1	_	SPAC4D7.13	SPAC4D7.13_G1	usp104	2217	7.27259	0.0489798	0.226063	0.634458	0.995634	0	-0.0199457	0.0368105	0.847851	0.915284	0	-0.0700941	0.458559	0.498298	0.687971	0
G1	_	SPAC4D7.14	SPAC4D7.14_G1	new13	366	3.07032	-0.198889	0.676539	0.410781	0.993196	0	0.39228	2.87627	0.0898938	0.215766	0	0.323352	2.01131	0.156131	0.33338	0
G1	_	SPAC4D7.15	SPAC4D7.15_G1	gem6	282	1.78599	0.0179923	0.00244478	0.960565	0.995634	0	-0.0254459	0.0045089	0.946464	0.972534	0	0.110394	0.0923894	0.761161	0.869839	0
G1	_	SPAC4F10.02	SPAC4F10.02_G1	ape4	1596	7.16746	0.0858495	0.776963	0.378071	0.991043	0	0.152552	2.42699	0.119262	0.262067	0	0.31734	10.7543	0.00104035	0.0077433	1
G1	_	SPAC4F10.03c	SPAC4F10.03c_G1	trm7	1233	5.94125	0.0321763	0.0635501	0.80097	0.995634	0	0.431666	11.5998	0.000659597	0.00447854	1	0.233548	3.40674	0.0649305	0.186148	0
G1	_	SPAC4F10.04	SPAC4F10.04_G1	ypa1	1412	5.85709	-0.0494501	0.173988	0.676592	0.995634	0	-0.392048	10.2368	0.00137662	0.0081853	-1	-0.500513	16.8194	4.11115e-05	0.000489821	-1
G1	_	SPAC4F10.05c	SPAC4F10.05c_G1	lip2	1022	5.27729	-0.0859437	0.294821	0.587147	0.995634	0	-0.106559	0.439424	0.507401	0.683404	0	0.0191667	0.0146685	0.903601	0.95054	0
G1	_	SPAC4F10.06	SPAC4F10.06_G1	bud22	1556	6.55638	-0.0223896	0.0312033	0.859788	0.995634	0	0.244649	3.73283	0.053353	0.14575	0	0.145558	1.32738	0.249271	0.456227	0
G1	_	SPMITTRNATRP.01	SPMITTRNATRP.01_G1		72	5.63548	-0.214297	2.73384	0.0982429	0.833431	0	-0.423791	10.1308	0.00145809	0.00854802	-1	-0.213583	2.6984	0.100449	0.248882	0
G1	_	SPAC4F10.07c	SPAC4F10.07c_G1	atg13	2917	5.42957	0.0731287	0.320261	0.571451	0.995634	0	0.0732077	0.310736	0.577229	0.737655	0	0.11476	0.791446	0.373663	0.580791	0
G1	_	SPAC4F10.08	SPAC4F10.08_G1	mug126	2431	4.3639	0.0610523	0.100941	0.750704	0.995634	0	-0.00450469	0.000530267	0.981628	0.9912	0	-0.335344	2.9008	0.0885357	0.228851	0
G1	_	SPAC4F10.09c	SPAC4F10.09c_G1	noc1	2925	7.63799	0.0686934	0.574726	0.448387	0.995634	0	0.726136	65.7146	5.2119e-16	3.47479e-14	1	0.635038	50.5193	1.17998e-12	6.26688e-11	1
G1	_	SPAC4F10.10c	SPAC4F10.10c_G1	mnn9	2095	7.63882	0.0208487	0.0313732	0.85941	0.995634	0	-0.185826	2.45014	0.117514	0.259318	0	-0.165488	1.95946	0.161571	0.341276	0
G1	_	SPNCRNA.1038	SPNCRNA.1038_G1		663	5.6342	0.26498	3.7788	0.0519058	0.686942	0	0.415259	9.18566	0.00243918	0.0130318	1	0.515038	14.5722	0.000134891	0.00138357	1
G1	_	SPAC4F10.11	SPAC4F10.11_G1	spn1	2120	7.07488	-0.00239922	0.000544764	0.981379	0.9991	0	0.245264	5.7049	0.0169176	0.0607929	0	0.205574	4.04207	0.0443793	0.142555	0
G1	_	SPAC4F10.12	SPAC4F10.12_G1	fta1	1231	5.73407	0.152882	1.59568	0.206517	0.932066	0	-0.213759	2.89492	0.0888591	0.214713	0	-0.0882823	0.515642	0.472707	0.66557	0
G1	_	SPAC4F10.13c	SPAC4F10.13c_G1	mpd2	3244	7.21937	-0.0614494	0.500214	0.479406	0.995634	0	-0.0143212	0.0267738	0.870025	0.928392	0	0.0283648	0.107117	0.74345	0.861247	0
G1	_	SPAC4F10.14c	SPAC4F10.14c_G1	btf3	626	10.337	0.0405425	0.10831	0.742077	0.995634	0	0.0811245	0.432188	0.510918	0.686371	0	0.0974531	0.622947	0.429954	0.630895	0
G1	_	SPAC4F10.15c	SPAC4F10.15c_G1	wsp1	2070	4.38449	0.00494957	0.000967663	0.975184	0.998934	0	0.307065	3.78364	0.051756	0.142386	0	0.514589	11.5379	0.000681899	0.00548484	1
G1	_	SPAC4F10.16c	SPAC4F10.16c_G1		6104	7.5106	0.020678	0.0467961	0.828735	0.995634	0	0.0467958	0.236927	0.626435	0.774183	0	0.000482197	2.54272e-05	0.995977	0.99725	0
G1	_	SPAC4F10.17	SPAC4F10.17_G1		958	3.26055	0.497684	4.63558	0.0313155	0.601693	0	-0.830122	9.82015	0.0017261	0.0097367	-1	-0.793596	9.55218	0.00199712	0.0131747	-1
G1	_	SPAC4F10.18	SPAC4F10.18_G1	nup37	1523	5.91095	0.0405245	0.111277	0.738695	0.995634	0	0.320969	7.02354	0.00804452	0.0341797	1	0.241923	4.03692	0.0445149	0.142918	0
G1	_	SPAC4F10.19c	SPAC4F10.19c_G1	hit1	973	4.34992	0.219546	2.18956	0.138949	0.905888	0	-0.0216799	0.0192749	0.889581	0.940612	0	0.111964	0.557001	0.455471	0.65051	0
G1	_	SPAC4F10.20	SPAC4F10.20_G1	grx1	502	10.0078	0.0484172	0.126387	0.722208	0.995634	0	-0.753283	29.9222	4.49733e-08	8.97604e-07	-1	-0.723331	27.8365	1.32013e-07	2.79265e-06	-1
G1	_	SPAC4F10.22	SPAC4F10.22_G1	cmc4	213	4.74877	0.037994	0.0372669	0.846923	0.995634	0	-0.00866335	0.0018921	0.965304	0.983509	0	0.211962	1.1691	0.279587	0.489139	0
G1	_	SPAC4F8.01	SPAC4F8.01_G1	did4	937	6.67486	0.0856467	0.559396	0.454504	0.995634	0	0.118396	1.05204	0.305037	0.493871	0	0.15108	1.73946	0.187208	0.377235	0
G1	_	SPAC4F8.02c	SPAC4F8.02c_G1	mrpl40	1302	4.90209	-0.182046	0.833658	0.361217	0.986778	0	-0.126343	0.397706	0.528276	0.69983	0	-0.157027	0.624286	0.429459	0.630895	0
G1	_	SPAC4F8.03	SPAC4F8.03_G1	sdo1	1119	7.11632	0.100578	0.798991	0.371395	0.991043	0	0.0942355	0.692272	0.405393	0.593875	0	0.120922	1.15127	0.283284	0.492193	0
G1	_	SPAC4F8.04	SPAC4F8.04_G1		1295	6.69373	0.149554	1.74099	0.187013	0.919597	0	0.988964	79.4781	4.87589e-19	4.92858e-17	1	0.872306	61.9958	3.44185e-15	2.80131e-13	1
G1	_	SPAC4F8.05c	SPAC4F8.05c_G1	mrpl28	722	6.30029	0.0439122	0.12789	0.72063	0.995634	0	0.0740428	0.356555	0.550426	0.716694	0	0.126699	1.06587	0.301879	0.509665	0
G1	_	SPAC4F8.06	SPAC4F8.06_G1	mrps12	929	5.55948	-0.0229519	0.0427366	0.836222	0.995634	0	-0.118742	1.0845	0.297693	0.485339	0	-0.157578	1.96903	0.160551	0.339578	0
G1	_	SPNCRNA.1206	SPNCRNA.1206_G1	nup211-antisense-1	4984	6.94206	-0.426715	7.24828	0.0070969	0.353274	0	-0.614737	14.8181	0.000118396	0.00103054	-1	-0.502273	10.0156	0.00155223	0.0107967	-1
G1	_	SPAC4F8.07c	SPAC4F8.07c_G1	hxk2	3051	7.88762	-0.133096	1.22835	0.267728	0.956502	0	-0.198544	2.71174	0.0996122	0.232416	0	-0.0643329	0.287237	0.591997	0.755994	0
G1	_	SPAC4F8.08	SPAC4F8.08_G1	mug114	2048	1.17936	-0.215517	0.260042	0.610092	0.995634	0	-0.389208	0.771336	0.379804	0.568889	0	-0.139186	0.111064	0.738936	0.85869	0
G1	_	SPAC4F8.10c	SPAC4F8.10c_G1	stg1	890	6.52103	0.113849	1.23343	0.266741	0.956331	0	0.0586161	0.317835	0.572912	0.734076	0	0.0298267	0.0835647	0.772523	0.876272	0
G1	_	SPAC4F8.11	SPAC4F8.11_G1	sea2	5299	6.50751	-0.198391	3.6709	0.0553703	0.705098	0	-0.140292	1.80058	0.179642	0.347367	0	0.105178	1.05989	0.303239	0.511148	0
G1	_	SPNCRNA.1570	SPNCRNA.1570_G1	coq8-antisense-1	2344	4.6896	0.240847	2.47183	0.115903	0.87094	0	0.400429	6.76328	0.00930525	0.0383658	1	0.408951	7.30873	0.00686205	0.0352207	1
G1	_	SPAC4F8.12c	SPAC4F8.12c_G1	spp42	7337	8.83601	-0.13166	1.73344	0.187972	0.920373	0	0.176163	3.11109	0.0777609	0.194154	0	0.223862	5.04517	0.0246947	0.09408	0
G1	_	SPAC4F8.13c	SPAC4F8.13c_G1	rng2	5048	7.36354	-0.0302251	0.0835946	0.772484	0.995634	0	0.174981	2.79615	0.0944908	0.2238	0	0.14415	1.91479	0.166432	0.348256	0
G1	_	SPNCRNA.652	SPNCRNA.652_G1	SPAC24H6.11c-antisense-1	3250	4.51963	0.324694	4.48736	0.0341464	0.611278	0	0.546994	12.7479	0.000356417	0.00265596	1	0.499434	10.9728	0.000924593	0.00705276	1
G1	_	SPAC4F8.14c	SPAC4F8.14c_G1	hcs1	1528	7.3776	-0.0199036	0.0425097	0.836651	0.995634	0	-0.436639	19.5853	9.62048e-06	0.000116051	-1	-0.30424	9.71207	0.00183062	0.0122963	-1
G1	_	SPAC4F8.15	SPAC4F8.15_G1	itr1	2755	7.22733	-0.13133	0.62425	0.429472	0.995634	0	-0.127005	0.579159	0.446642	0.630165	0	-0.248499	2.19873	0.138124	0.306959	0
G1	_	SPAC4G8.02c	SPAC4G8.02c_G1	sss1	400	7.44049	0.0282741	0.0617872	0.803693	0.995634	0	-0.0113264	0.00977155	0.921256	0.959853	0	0.10147	0.795427	0.372464	0.580123	0
G1	_	SPAC4G8.03c	SPAC4G8.03c_G1	puf5	4800	6.55746	-0.115819	0.391936	0.531283	0.995634	0	-0.173609	0.866223	0.352003	0.54271	0	-0.0605761	0.1061	0.744629	0.861247	0
G1	_	SPAC4G8.04	SPAC4G8.04_G1		2738	6.12234	0.00454966	0.00163389	0.967757	0.996588	0	-0.145518	1.60159	0.205678	0.380568	0	-0.0356641	0.0996257	0.752279	0.865289	0
G1	_	SPAC4G8.05	SPAC4G8.05_G1	ppk14	2165	5.98005	0.0968997	0.650756	0.419842	0.995634	0	-0.0161729	0.017518	0.894703	0.943639	0	-0.0421047	0.120987	0.727966	0.853239	0
G1	_	SPNCRNA.725	SPNCRNA.725_G1	psm3-antisense-1	4620	2.40118	0.781948	5.63177	0.0176378	0.507757	0	0.908778	7.50145	0.00616492	0.0274595	1	0.740856	4.99852	0.025369	0.0956605	0
G1	_	SPAC4G8.07c	SPAC4G8.07c_G1	trm2	1633	6.07026	-0.0957142	0.883489	0.347248	0.983844	0	0.133595	1.72357	0.189235	0.360247	0	0.112805	1.26065	0.261529	0.468956	0
G1	_	SPAC4G8.08	SPAC4G8.08_G1		1113	5.6054	0.0148972	0.0177968	0.893873	0.995634	0	-0.0402891	0.124353	0.724361	0.840817	0	0.0163838	0.0214654	0.883518	0.93784	0
G1	_	SPAC4G8.09	SPAC4G8.09_G1		2894	6.48043	0.128035	1.94021	0.163645	0.919597	0	-0.426691	19.5205	9.95272e-06	0.000119719	-1	-0.281835	8.93981	0.00279021	0.0172516	-1
G1	_	SPAC4G8.10	SPAC4G8.10_G1	gos1	2072	6.13671	0.081998	0.718703	0.39657	0.991043	0	0.0995182	1.02692	0.310883	0.50064	0	-0.0230014	0.0555978	0.813594	0.90037	0
G1	_	SPAC4G8.11c	SPAC4G8.11c_G1	atp10	2089	4.00582	0.0680093	0.117314	0.731967	0.995634	0	0.194212	0.945544	0.330856	0.522717	0	0.0867937	0.191246	0.661882	0.808265	0
G1	_	SPAC4G8.12c	SPAC4G8.12c_G1	smp3	2616	5.16558	-0.162736	1.42049	0.233323	0.947728	0	0.110619	0.66159	0.415999	0.602846	0	0.151552	1.28706	0.256591	0.463572	0
G1	_	SPAC4G8.13c	SPAC4G8.13c_G1	prz1	3442	6.30856	-0.173751	1.71192	0.190736	0.920373	0	-0.0878058	0.431859	0.511078	0.686439	0	0.122502	0.865694	0.35215	0.560418	0
G1	_	SPNCRNA.905	SPNCRNA.905_G1	SPAC8E11.01c-antisense-1	2586	4.80751	0.391123	6.70061	0.009638	0.384722	0	0.494754	10.5158	0.00118359	0.00727923	1	0.424602	7.9115	0.00491215	0.0270514	1
G1	_	SPAC4G9.03	SPAC4G9.03_G1	adk1	894	6.67303	-0.0191727	0.0307706	0.860753	0.995634	0	0.232767	4.53895	0.0331318	0.102083	0	0.308436	8.11777	0.00438333	0.0248826	1
G1	_	SPAC4G9.04c	SPAC4G9.04c_G1	pcf11	3472	6.18454	-0.268215	6.37003	0.0116064	0.41328	0	-0.168219	2.46548	0.116372	0.258127	0	-0.0823822	0.612687	0.433778	0.63368	0
G1	_	SPAC4G9.05	SPAC4G9.05_G1	mpf1	3088	3.58445	0.463244	5.11513	0.0237181	0.549972	0	0.893611	20.1122	7.30276e-06	9.00914e-05	1	1.0331	29.4359	5.77975e-08	1.36686e-06	1
G1	_	SPAC4G9.06c	SPAC4G9.06c_G1	chz1	2796	6.43565	0.015106	0.0155381	0.900799	0.995634	0	-0.203532	2.72329	0.0988937	0.231256	0	-0.140718	1.32992	0.248819	0.455684	0
G1	_	SPAC4G9.07	SPAC4G9.07_G1	mug133	2616	3.35524	0.382273	3.23398	0.0721252	0.775505	0	-0.243841	1.10183	0.293865	0.480859	0	-0.0730044	0.107423	0.743098	0.861247	0
G1	_	SPAC4G9.08c	SPAC4G9.08c_G1	rpc2	3620	6.65724	0.0716134	0.524177	0.469065	0.995634	0	0.207824	4.37639	0.0364401	0.109472	0	0.108388	1.19869	0.273583	0.481884	0
G1	_	SPAC4G9.09c	SPAC4G9.09c_G1	arg11	3004	8.31854	0.030306	0.0867806	0.768311	0.995634	0	0.0134009	0.0168252	0.896794	0.945049	0	0.138637	1.81623	0.177762	0.364183	0
G1	_	SPAC4G9.10	SPAC4G9.10_G1	arg3	1752	6.71662	0.121373	1.4177	0.233783	0.947728	0	-0.482559	20.8407	4.99114e-06	6.4211e-05	-1	-0.571028	29.4578	5.71473e-08	1.3566e-06	-1
G1	_	SPAC4G9.11c	SPAC4G9.11c_G1	cmb1	758	5.64772	-0.0973654	0.44431	0.50505	0.995634	0	0.0136509	0.00862904	0.925989	0.961586	0	-0.0110674	0.00581047	0.939239	0.967649	0
G1	_	SPAC4G9.12	SPAC4G9.12_G1	idn1	1200	5.81191	0.233521	2.58636	0.107788	0.859776	0	-0.172405	1.34617	0.245949	0.428752	0	-0.289171	3.79931	0.0512736	0.157593	0
G1	_	SPAC4G9.13c	SPAC4G9.13c_G1	vps26	2453	6.7144	0.139699	1.44751	0.228928	0.947294	0	0.245819	4.44525	0.0349984	0.10637	0	0.344037	8.85861	0.0029171	0.0178879	1
G1	_	SPAC4G9.14	SPAC4G9.14_G1	sym1	1279	6.57115	-0.0434902	0.22665	0.634019	0.995634	0	-0.00541877	0.00343223	0.953282	0.975702	0	-0.0294007	0.103358	0.747837	0.863429	0
G1	_	SPAC4G9.15	SPAC4G9.15_G1	ifa38	1233	6.54552	-0.00851913	0.00870825	0.925651	0.995634	0	-0.158017	2.86311	0.0906318	0.216733	0	-0.249626	7.24353	0.0071157	0.0362603	-1
G1	_	SPAC4G9.16c	SPAC4G9.16c_G1	rpl901	784	10.3275	0.0836642	0.571617	0.449617	0.995634	0	0.0578099	0.272406	0.601722	0.757076	0	0.214789	3.75819	0.0525493	0.160334	0
G1	_	SPAC4G9.17c	SPAC4G9.17c_G1	mrp5	1524	6.01686	0.0665757	0.270015	0.603322	0.995634	0	0.315648	6.07918	0.0136784	0.0514232	0	0.0393466	0.0935299	0.759737	0.869793	0
G1	_	SPAC4G9.19	SPAC4G9.19_G1		1349	4.31662	0.00919818	0.00361807	0.952036	0.995634	0	0.20868	1.85901	0.172739	0.338404	0	0.190559	1.62337	0.202622	0.397196	0
G1	_	SPAC4G9.20c	SPAC4G9.20c_G1	ymc1	1414	3.60282	0.134679	0.37302	0.541363	0.995634	0	0.377525	2.94859	0.0859527	0.209679	0	0.194444	0.785088	0.375589	0.582196	0
G1	_	SPAC4G9.22	SPAC4G9.22_G1		1113	6.72613	-0.0522114	0.194436	0.65925	0.995634	0	-0.397339	10.8219	0.00100306	0.00637546	-1	-0.397826	10.9719	0.000925063	0.00705276	-1
G1	_	SPAC4H3.02c	SPAC4H3.02c_G1	swc3	1526	4.47714	-0.26232	2.36729	0.123902	0.889217	0	0.0749654	0.197272	0.656932	0.794776	0	-0.00440404	0.000689344	0.979054	0.988677	0
G1	_	SPAC4H3.03c	SPAC4H3.03c_G1		2922	5.2516	0.192733	0.755658	0.384691	0.991043	0	-0.431302	3.5934	0.0580095	0.155428	0	-0.0578051	0.0668857	0.795926	0.891204	0
G1	_	SPAC4H3.04c	SPAC4H3.04c_G1		1324	5.51054	0.226035	1.98388	0.158982	0.919597	0	0.0627439	0.148667	0.699813	0.82423	0	0.0988101	0.3764	0.539536	0.71705	0
G1	_	SPAC4H3.05	SPAC4H3.05_G1	srs2	3254	5.75397	-0.0483546	0.156063	0.692808	0.995634	0	0.0226057	0.0334454	0.854892	0.918662	0	0.0376633	0.0954514	0.757358	0.868661	0
G1	_	SPAC4H3.06	SPAC4H3.06_G1		2165	6.52469	0.0863199	0.608882	0.435209	0.995634	0	0.267736	5.81341	0.0159045	0.0580171	0	0.176516	2.55327	0.110066	0.264772	0
G1	_	SPAC4H3.07c	SPAC4H3.07c_G1	rdl2	545	7.70695	-0.107085	0.79561	0.372409	0.991043	0	-0.338243	7.76594	0.00532406	0.0244977	-1	-0.34403	8.11383	0.00439289	0.0249143	-1
G1	_	SPAC4H3.08	SPAC4H3.08_G1		1639	8.80343	-0.0236201	0.0123153	0.911637	0.995634	0	-1.87933	72.9027	1.36203e-17	1.12313e-15	-1	-2.3123	107.773	3.01358e-25	6.09229e-23	-1
G1	_	SPAC4H3.09	SPAC4H3.09_G1		491	6.60284	-0.0969034	0.642427	0.422833	0.995634	0	-0.224628	3.35533	0.0669879	0.17319	0	-0.157876	1.69403	0.193071	0.385834	0
G1	_	SPAC4H3.10c	SPAC4H3.10c_G1	pyk1	1903	10.5508	-0.0231972	0.0360919	0.849326	0.995634	0	0.164425	1.80824	0.17872	0.346118	0	0.214471	3.08089	0.0792173	0.213104	0
G1	_	SPAC4H3.11c	SPAC4H3.11c_G1	ppc89	2964	5.95973	0.0442828	0.186711	0.665669	0.995634	0	0.383801	14.2959	0.000156208	0.00131757	1	0.318246	10.0277	0.00154205	0.0107378	1
G1	_	SPAC4H3.13	SPAC4H3.13_G1	pcc1	611	4.94994	0.105453	0.624402	0.429416	0.995634	0	-0.250614	3.18791	0.0741848	0.187693	0	-0.155475	1.29844	0.254498	0.461765	0
G1	_	SPAC4H3.14c	SPAC4H3.14c_G1	rng8	1339	6.22034	0.0176662	0.0259076	0.872126	0.995634	0	0.306023	7.80848	0.00520017	0.0240158	1	0.107083	0.957387	0.327846	0.537716	0
G1	_	SPAC4H3.16	SPAC4H3.16_G1		2599	5.84194	0.0641705	0.271618	0.602249	0.995634	0	0.0652675	0.274242	0.6005	0.755993	0	-0.130868	1.10377	0.29344	0.500772	0
G1	_	SPAC4H3.17	SPAC4H3.17_G1		261	4.94574	-0.0270604	0.0449128	0.832164	0.995634	0	-0.540855	15.6133	7.7707e-05	0.000713189	-1	-0.366759	7.75983	0.00534209	0.0289359	-1
G1	_	SPAC513.01c	SPAC513.01c_G1	eft201	2632	7.69157	-0.224658	5.10464	0.023862	0.549972	0	-0.150388	2.27185	0.131742	0.281689	0	-0.0475999	0.230362	0.631256	0.787593	0
G1	_	SPAC513.02	SPAC513.02_G1		1255	5.84606	-0.100936	0.0881634	0.766525	0.995634	0	-0.596925	2.90074	0.0885389	0.214154	0	-0.577995	2.7475	0.0974066	0.243692	0
G1	_	SPAC513.03	SPAC513.03_G1	mfm2	467	8.04458	-0.246913	1.37776	0.240483	0.947728	0	-0.22387	1.12836	0.288124	0.474402	0	-0.420627	3.93947	0.0471657	0.148448	0
G1	_	SPAC513.04	SPAC513.04_G1		303	3.22428	0.196074	0.7542	0.38515	0.991043	0	0.0211483	0.00812726	0.928167	0.962713	0	-0.0150247	0.00423293	0.948125	0.971187	0
G1	_	SPAC513.06c	SPAC513.06c_G1	dhd1	5534	6.44944	0.112582	1.1078	0.292561	0.970725	0	-0.00925507	0.00723308	0.932224	0.964559	0	-0.00706767	0.00431394	0.947632	0.971187	0
G1	_	SPAC513.07	SPAC513.07_G1		1759	8.33406	0.144571	0.769206	0.380463	0.991043	0	-0.306288	3.42274	0.0643041	0.168416	0	-0.470013	7.97309	0.00474778	0.0263341	-1
G1	_	SPAC521.02	SPAC521.02_G1	wss1	969	7.29734	0.0512865	0.270837	0.602771	0.995634	0	0.136231	1.89235	0.168937	0.334512	0	0.0613012	0.385471	0.53469	0.713385	0
G1	_	SPAC521.03	SPAC521.03_G1		1195	7.92975	-0.0276124	0.0367295	0.848017	0.995634	0	-0.702284	22.9795	1.63738e-06	2.34756e-05	-1	-0.732092	25.1716	5.24493e-07	9.84131e-06	-1
G1	_	SPAC521.04c	SPAC521.04c_G1	sst1	3459	6.21794	0.0419454	0.107943	0.742498	0.995634	0	-0.189918	2.12476	0.144936	0.300965	0	-0.0445627	0.12058	0.728406	0.85337	0
G1	_	SPAC521.05	SPAC521.05_G1	rps802	839	7.6061	0.148153	0.952408	0.329107	0.978887	0	0.298408	3.82968	0.0503524	0.139519	0	0.287554	3.5755	0.0586377	0.173259	0
G1	_	SPAC56E4.02c	SPAC56E4.02c_G1	alg13	1221	5.51266	-0.00735563	0.00292447	0.956873	0.995634	0	-0.0866704	0.391084	0.53173	0.703473	0	-0.0826601	0.365064	0.545707	0.721812	0
G1	_	SPAC56E4.03	SPAC56E4.03_G1		1989	8.7765	-0.106546	0.971882	0.324211	0.978335	0	-0.654503	35.8652	2.11456e-09	5.49873e-08	-1	-0.586954	29.056	7.03166e-08	1.6261e-06	-1
G1	_	SPAC56E4.04c	SPAC56E4.04c_G1	cut6	7222	11.1294	-0.218197	3.72395	0.0536373	0.695166	0	-0.154556	1.8686	0.171635	0.337415	0	-0.291841	6.64812	0.00992607	0.0468451	-1
G1	_	SPAC56E4.05	SPAC56E4.05_G1	snd2	1033	5.62334	0.1066	0.869454	0.351106	0.983844	0	-0.0750076	0.405455	0.524286	0.695975	0	-0.116346	1.00033	0.31723	0.527902	0
G1	_	SPAC56E4.06c	SPAC56E4.06c_G1	ggt2	2412	5.928	0.0189493	0.0175301	0.894667	0.995634	0	0.100708	0.489209	0.48428	0.663965	0	0.256804	3.25325	0.0712818	0.198251	0
G1	_	SPAC56E4.07	SPAC56E4.07_G1		3986	6.36916	0.150865	2.29145	0.130089	0.889217	0	-0.338808	10.6359	0.00110916	0.00693199	-1	-0.283277	7.66351	0.00563486	0.0299269	-1
G1	_	SPAC56F8.02	SPAC56F8.02_G1	cmr2	5047	6.93699	-0.105663	1.00602	0.315857	0.973112	0	0.131653	1.56395	0.211087	0.386395	0	0.112046	1.14655	0.284272	0.492953	0
G1	_	SPAC56F8.03	SPAC56F8.03_G1	tif52	3571	8.21975	-0.201628	3.59934	0.0578026	0.710752	0	0.0657	0.382819	0.536098	0.706271	0	-0.0683896	0.415565	0.519159	0.701653	0
G1	_	SPAC56F8.04c	SPAC56F8.04c_G1	ppt1	1083	5.85711	0.0875296	0.458582	0.498287	0.995634	0	-0.0391288	0.0886512	0.765899	0.868125	0	-0.0880575	0.456567	0.499233	0.688684	0
G1	_	SPAC56F8.05c	SPAC56F8.05c_G1	mug64	1175	7.7888	-0.0948569	1.09334	0.295733	0.970854	0	-0.810655	75.285	4.07435e-18	3.59633e-16	-1	-0.828242	79.2648	5.43178e-19	6.6747e-17	-1
G1	_	SPAC56F8.06c	SPAC56F8.06c_G1	alg10	1809	5.00933	0.0663065	0.194787	0.658962	0.995634	0	0.329718	4.84365	0.0277481	0.0894073	0	0.204959	1.89364	0.168792	0.351553	0
G1	_	SPAC56F8.07	SPAC56F8.07_G1		552	4.7283	0.0399371	0.048792	0.825179	0.995634	0	-0.406994	4.68671	0.0303967	0.0957452	0	-0.259793	1.99015	0.158325	0.336593	0
G1	_	SPAC56F8.08	SPAC56F8.08_G1	mud1	1082	6.60157	0.137001	2.29243	0.130007	0.889217	0	-0.165406	3.13382	0.0766837	0.192107	0	-0.0707347	0.594177	0.440808	0.639183	0
G1	_	SPAC56F8.09	SPAC56F8.09_G1	rrp8	1423	5.85121	0.0527464	0.143874	0.704459	0.995634	0	0.690309	25.5804	4.24328e-07	6.87148e-06	1	0.629776	21.5305	3.48252e-06	5.38888e-05	1
G1	_	SPAC56F8.10	SPAC56F8.10_G1	met9	2194	7.27457	0.0389162	0.127089	0.72147	0.995634	0	-0.0490995	0.198679	0.655789	0.794431	0	0.0241384	0.0487356	0.825278	0.906735	0
G1	_	SPAC56F8.11	SPAC56F8.11_G1	spc3	1237	7.01646	0.0883618	0.702402	0.401978	0.991347	0	-0.134669	1.581	0.208616	0.383964	0	-0.138635	1.69438	0.193024	0.385834	0
G1	_	SPAC56F8.12	SPAC56F8.12_G1		1253	0.939965	0.6035	0.997171	0.317996	0.976394	0	1.53112	7.78887	0.00525691	0.0242421	1	1.53079	8.33487	0.00388912	0.0225886	1
G1	_	SPAC56F8.13	SPAC56F8.13_G1		1582	3.59186	0.151869	0.598313	0.439222	0.995634	0	-0.191906	0.844638	0.358074	0.548533	0	-0.118081	0.342217	0.558552	0.731446	0
G1	_	SPAC56F8.14c	SPAC56F8.14c_G1	mug115	4048	7.27638	0.0487908	0.239401	0.624639	0.995634	0	-0.122453	1.47203	0.225026	0.404079	0	-0.0900666	0.805039	0.369591	0.577613	0
G1	_	SPAC56F8.15	SPAC56F8.15_G1		2208	4.97411	-0.66222	6.78184	0.00920897	0.375942	0	-0.00889301	0.00125825	0.971704	0.98682	0	-0.0731258	0.0869696	0.768066	0.872954	0
G1	_	SPAC56F8.16	SPAC56F8.16_G1	esc1	3233	7.5291	-0.53664	10.3811	0.00127315	0.166225	0	-0.0830701	0.252227	0.615511	0.766271	0	-0.0873606	0.278485	0.597696	0.760869	0
G1	_	SPAC57A10.02	SPAC57A10.02_G1	cdr2	3220	5.51861	-0.264321	4.15203	0.0415847	0.64145	0	0.0575181	0.199201	0.655366	0.794297	0	0.10075	0.630721	0.427091	0.629251	0
G1	_	SPAC57A10.03	SPAC57A10.03_G1	cyp1	972	6.30752	-0.0587307	0.253252	0.614795	0.995634	0	0.0194782	0.0274277	0.868461	0.927497	0	-0.0880441	0.565001	0.452252	0.647966	0
G1	_	SPAC57A10.04	SPAC57A10.04_G1	mug10	1283	3.19052	0.0587742	0.0646874	0.799235	0.995634	0	0.570191	6.57339	0.0103515	0.0417993	1	0.306092	1.88043	0.170286	0.35302	0
G1	_	SPAC57A10.05c	SPAC57A10.05c_G1	pof1	3519	5.5475	0.124736	0.594687	0.440612	0.995634	0	0.0567455	0.12013	0.728893	0.844358	0	-0.0745906	0.208639	0.647836	0.799211	0
G1	_	SPAC57A10.06	SPAC57A10.06_G1	mug15	402	1.39904	0.150539	0.173575	0.676954	0.995634	0	-1.28385	8.25182	0.00407112	0.0196562	-1	-1.45741	10.9356	0.000943339	0.00715727	-1
G1	_	SPAC57A10.07	SPAC57A10.07_G1		1232	6.94081	0.0302593	0.124619	0.724078	0.995634	0	0.0686697	0.628519	0.427899	0.613083	0	0.0281491	0.107386	0.74314	0.861247	0
G1	_	SPAC57A10.08c	SPAC57A10.08c_G1		1333	5.93286	0.0263249	0.0527394	0.818363	0.995634	0	0.0990882	0.732431	0.392096	0.581466	0	0.161949	2.02071	0.155166	0.332113	0
G1	_	SPAC57A10.09c	SPAC57A10.09c_G1	nhp6	875	7.40434	-0.0108371	0.0107962	0.917245	0.995634	0	0.0598053	0.325597	0.568263	0.730225	0	0.0501875	0.231859	0.630149	0.787593	0
G1	_	SPAC57A10.10c	SPAC57A10.10c_G1	sla1	1110	7.38008	-0.136891	1.54504	0.213869	0.934145	0	0.759075	49.0331	2.51684e-12	1.01109e-10	1	0.661322	37.4866	9.20436e-10	3.06828e-08	1
G1	_	SPAC57A10.11c	SPAC57A10.11c_G1	mia40	1688	6.84039	0.0534902	0.258876	0.610894	0.995634	0	0.116719	1.21887	0.269582	0.45428	0	0.0505329	0.230467	0.631178	0.787593	0
G1	_	SPAC57A10.12c	SPAC57A10.12c_G1	ura3	1707	7.81854	0.0187876	0.0145348	0.904039	0.995634	0	0.506529	10.5095	0.00118764	0.00729698	1	0.32973	4.47592	0.0343758	0.119155	0
G1	_	SPAC57A7.05	SPAC57A7.05_G1		7435	6.23924	-0.300401	2.72658	0.0986902	0.834672	0	-0.573257	9.72607	0.00181673	0.0101746	-1	-0.600998	10.7199	0.00105989	0.00787008	-1
G1	_	SPAC57A7.06	SPAC57A7.06_G1	utp14	3147	6.59919	-0.278234	5.57523	0.0182163	0.507757	0	0.612303	28.5232	9.2582e-08	1.7015e-06	1	0.600809	27.8316	1.32347e-07	2.79265e-06	1
G1	_	SPAC57A7.07c	SPAC57A7.07c_G1		1392	6.13507	-0.0246932	0.0554015	0.813918	0.995634	0	0.0676393	0.40834	0.522813	0.694609	0	0.0670537	0.410805	0.521561	0.703384	0
G1	_	SPAC57A7.08	SPAC57A7.08_G1	pzh1	2298	6.1772	-0.0882755	0.37903	0.538123	0.995634	0	-0.213309	2.17534	0.140239	0.294135	0	-0.277498	3.7072	0.0541782	0.163868	0
G1	_	SPAC57A7.09	SPAC57A7.09_G1		1541	4.48868	-0.160881	0.770274	0.380132	0.991043	0	0.0652135	0.126875	0.721695	0.839276	0	0.160096	0.789902	0.37413	0.581041	0
G1	_	SPAC57A7.10c	SPAC57A7.10c_G1	sec21	3134	8.36788	-0.0930227	0.755682	0.384683	0.991043	0	-0.179244	2.78049	0.0954192	0.225148	0	-0.0612291	0.32731	0.567247	0.738152	0
G1	_	SPAC57A7.11	SPAC57A7.11_G1	mip1	4238	7.557	-0.0695627	0.619331	0.431296	0.995634	0	0.0732576	0.683129	0.408511	0.596075	0	0.236182	7.26262	0.00704046	0.0359597	1
G1	_	SPAC57A7.12	SPAC57A7.12_G1	ssz1	1893	8.80086	-0.0655385	0.421553	0.516163	0.995634	0	-0.144372	2.03132	0.154086	0.313121	0	-0.2715	7.17731	0.00738315	0.0373147	-1
G1	_	SPAC57A7.13	SPAC57A7.13_G1	rbm10	1989	5.67198	0.0701706	0.394363	0.530015	0.995634	0	0.207995	3.42106	0.0643695	0.168416	0	0.0799953	0.512603	0.474014	0.666363	0
G1	_	SPAC57A7.15c	SPAC57A7.15c_G1		876	5.51131	-0.0481364	0.142826	0.705488	0.995634	0	-0.174395	1.78852	0.181107	0.349014	0	-0.237111	3.38003	0.0659907	0.188497	0
G1	_	SPAC589.02c	SPAC589.02c_G1	med13	3678	6.11903	-0.0876746	0.497121	0.480768	0.995634	0	0.0456739	0.133657	0.71467	0.835448	0	0.0678215	0.300781	0.583393	0.749452	0
G1	_	SPAC589.03c	SPAC589.03c_G1	noc12	921	4.70927	0.0349177	0.0335603	0.854645	0.995634	0	0.677516	13.1585	0.000286212	0.00220898	1	0.47356	6.4042	0.0113851	0.0522204	0
G1	_	SPAC589.04	SPAC589.04_G1	mtx2	1230	6.11142	0.0653314	0.430841	0.511576	0.995634	0	0.032637	0.10347	0.747705	0.858008	0	0.169243	2.92538	0.0871966	0.227502	0
G1	_	SPAC589.05c	SPAC589.05c_G1	qng1	1407	5.94471	0.0624048	0.186983	0.66544	0.995634	0	0.0380725	0.0681278	0.794082	0.883614	0	-0.0180967	0.0155286	0.900829	0.948901	0
G1	_	SPAC589.06c	SPAC589.06c_G1	snd302	995	8.31519	-0.00293587	0.000686509	0.979097	0.9991	0	-0.118831	1.11434	0.291141	0.477889	0	-0.095443	0.724279	0.394744	0.599578	0
G1	_	SPAC589.07c	SPAC589.07c_G1	atg1801	1364	4.82647	0.0705336	0.239479	0.624583	0.995634	0	0.375032	6.87863	0.00872325	0.0362284	1	0.25826	3.31069	0.0688308	0.193349	0
G1	_	SPAC589.08c	SPAC589.08c_G1	dam1	744	3.426	0.0618338	0.0781389	0.779836	0.995634	0	0.161325	0.520486	0.470634	0.651038	0	0.261142	1.4437	0.229541	0.43292	0
G1	_	SPAC589.09	SPAC589.09_G1	csr101	2437	6.6075	-0.101071	0.974842	0.323475	0.978335	0	-0.168031	2.61747	0.105693	0.243075	0	-0.202481	3.8412	0.0500076	0.154612	0
G1	_	SPAC589.10c	SPAC589.10c_G1	ubi5	733	10.3249	0.081543	0.530626	0.466344	0.995634	0	-0.220537	3.86374	0.0493403	0.13749	0	-0.0870005	0.601481	0.438014	0.636308	0
G1	_	SPAC589.11	SPAC589.11_G1	pth4	549	2.86633	-0.089966	0.10454	0.746447	0.995634	0	0.18681	0.452684	0.501063	0.678761	0	-0.0535351	0.037164	0.847132	0.917465	0
G1	_	SPAC589.12	SPAC589.12_G1	cwh43	3012	8.09857	0.0204283	0.0378254	0.845794	0.995634	0	-0.212836	4.04292	0.0443571	0.126703	0	-0.18959	3.22904	0.0723431	0.200165	0
G1	_	SPAC5D6.01	SPAC5D6.01_G1	rps2202	668	8.92659	0.193066	2.95552	0.0855845	0.803569	0	0.45888	16.6374	4.525e-05	0.000444486	1	0.514687	21.0002	4.59228e-06	6.91823e-05	1
G1	_	SPAC5D6.02c	SPAC5D6.02c_G1	mug165	2033	3.89636	0.0865035	0.138456	0.709821	0.995634	0	0.429522	3.46611	0.0626385	0.164915	0	0.361961	2.49068	0.114522	0.269917	0
G1	_	SPAC5D6.04	SPAC5D6.04_G1		2339	6.94149	0.0343718	0.103213	0.748007	0.995634	0	0.0572132	0.281718	0.595577	0.751607	0	0.0826209	0.597099	0.439687	0.638147	0
G1	_	SPAC5D6.05	SPAC5D6.05_G1	med18	896	6.84531	0.0778679	0.448682	0.502962	0.995634	0	0.105606	0.812617	0.367348	0.556751	0	0.100982	0.751422	0.386026	0.592367	0
G1	_	SPAC5D6.06c	SPAC5D6.06c_G1	alg14	1078	5.60623	0.0963229	0.771748	0.379677	0.991043	0	-0.0940064	0.684387	0.40808	0.595584	0	0.151385	1.92038	0.165815	0.347427	0
G1	_	SPAC5D6.07c	SPAC5D6.07c_G1	pxa1	1850	5.65265	0.241275	3.27451	0.0703639	0.770157	0	0.226134	2.79863	0.0943448	0.223623	0	0.277789	4.34525	0.0371124	0.12545	0
G1	_	SPAC5D6.08c	SPAC5D6.08c_G1	mes1	1201	4.28819	-0.0500768	0.0734841	0.78633	0.995634	0	0.298716	2.67434	0.101978	0.236964	0	0.224356	1.53765	0.214968	0.412873	0
G1	_	SPAC5D6.09c	SPAC5D6.09c_G1	mug86	3400	5.04383	-0.0925726	0.263036	0.608042	0.995634	0	-0.102949	0.318651	0.57242	0.73376	0	-0.146869	0.65787	0.417313	0.62018	0
G1	_	SPAC5D6.12	SPAC5D6.12_G1	mtf2	3383	5.24562	-0.159809	1.32784	0.249191	0.949926	0	-0.540951	14.0225	0.000180636	0.0014915	-1	-0.444095	9.88528	0.00166606	0.0114217	-1
G1	_	SPAC5D6.13	SPAC5D6.13_G1	gpp74	2155	7.31678	0.16881	2.87184	0.090142	0.814006	0	-0.174588	2.96856	0.0848973	0.207751	0	-0.0927557	0.852549	0.355832	0.564129	0
G1	_	SPAC5H10.01	SPAC5H10.01_G1	dgc1	1082	3.56136	0.422274	3.72062	0.0537445	0.695166	0	0.778601	13.0046	0.000310725	0.00238256	1	0.278612	1.57076	0.210097	0.406508	0
G1	_	SPAC5H10.02c	SPAC5H10.02c_G1	hsp3102	2294	4.51242	0.136515	0.313684	0.575428	0.995634	0	-0.46073	3.33966	0.0676286	0.174336	0	-0.0883446	0.127299	0.721249	0.848429	0
G1	_	SPAC5H10.03	SPAC5H10.03_G1		3464	8.73685	-0.0579811	0.196864	0.657264	0.995634	0	-0.105662	0.649584	0.420262	0.606582	0	-0.153491	1.37155	0.241546	0.447067	0
G1	_	SPAC5H10.04	SPAC5H10.04_G1		2665	4.65277	0.360444	5.42721	0.0198254	0.512588	0	0.566918	13.4461	0.00024551	0.00195255	1	0.700862	21.7421	3.1187e-06	4.93557e-05	1
G1	_	SPAC5H10.05c	SPAC5H10.05c_G1		2514	6.09628	0.0791396	0.391655	0.53143	0.995634	0	-0.202821	2.45546	0.117117	0.258714	0	0.136164	1.16107	0.281245	0.49069	0
G1	_	SPAC5H10.06c	SPAC5H10.06c_G1	adh4	1878	6.21526	0.192428	2.40136	0.12123	0.885618	0	-0.261515	4.17629	0.0409933	0.11932	0	-0.0652937	0.270243	0.603169	0.765039	0
G1	_	SPAC5H10.07	SPAC5H10.07_G1		696	2.07522	0.223638	0.522857	0.469626	0.995634	0	-1.16989	9.84328	0.00170453	0.00965849	-1	-0.537805	2.57125	0.108822	0.263062	0
G1	_	SPAC5H10.08c	SPAC5H10.08c_G1	pan6	1066	5.76784	-0.00214604	0.000291436	0.98638	0.9991	0	-0.457208	12.2159	0.000473833	0.0034015	-1	-0.318455	6.16389	0.0130384	0.0575006	0
G1	_	SPAC5H10.09c	SPAC5H10.09c_G1	ecm31	846	3.33064	0.0969898	0.153985	0.694756	0.995634	0	-0.771169	8.25981	0.00405323	0.0196	-1	-0.385472	2.28522	0.130612	0.295331	0
G1	_	SPAC5H10.10	SPAC5H10.10_G1		1880	6.57151	0.178419	1.26908	0.25994	0.952101	0	-0.51936	10.274	0.00134917	0.00808339	-1	-0.341354	4.53002	0.0333052	0.116736	0
G1	_	SPAC5H10.11	SPAC5H10.11_G1	gmh1	1766	3.248	-0.0265814	0.0147401	0.903367	0.995634	0	-0.0622713	0.0763403	0.78232	0.876282	0	0.0380108	0.0304591	0.861453	0.926501	0
G1	_	SPAC5H10.12c	SPAC5H10.12c_G1	otg1	2013	7.44578	0.0349389	0.0715666	0.789069	0.995634	0	-0.234164	3.14701	0.0760664	0.190836	0	-0.215122	2.67897	0.101681	0.250837	0
G1	_	SPAC5H10.13c	SPAC5H10.13c_G1	gmh2	2372	6.54325	-0.100265	1.01306	0.31417	0.973112	0	-0.035788	0.126937	0.721629	0.839276	0	0.0418352	0.178514	0.672653	0.815854	0
G1	_	SPAC607.02c	SPAC607.02c_G1		1164	5.80584	-0.147234	1.42998	0.231767	0.947728	0	0.337176	7.72934	0.00543307	0.0248171	1	0.105174	0.746401	0.387618	0.593502	0
G1	_	SPAC607.03c	SPAC607.03c_G1	snu13	505	9.06864	0.0504452	0.245298	0.620405	0.995634	0	0.0997477	0.955477	0.328329	0.520301	0	0.107228	1.10861	0.292384	0.499929	0
G1	_	SPAC607.04	SPAC607.04_G1	arg82	1071	5.63246	-0.0710725	0.389765	0.532423	0.995634	0	-0.138134	1.40749	0.235474	0.416398	0	-0.0817656	0.513583	0.473592	0.666363	0
G1	_	SPAC607.05	SPAC607.05_G1	rpn9	1361	8.00446	-0.119734	1.23763	0.265928	0.955054	0	-0.098709	0.834436	0.360993	0.551119	0	-0.0400548	0.138504	0.709773	0.840303	0
G1	_	SPAC607.06c	SPAC607.06c_G1		1951	6.31605	-0.0168881	0.0226749	0.880305	0.995634	0	0.146709	1.7019	0.192039	0.363489	0	0.249348	5.06257	0.024448	0.0934242	0
G1	_	SPAC607.07c	SPAC607.07c_G1		950	6.95399	-0.0398436	0.153644	0.695077	0.995634	0	-0.0847446	0.678979	0.409939	0.59774	0	0.0591881	0.340524	0.559527	0.73181	0
G1	_	SPAC607.08c	SPAC607.08c_G1	mil1	1740	6.09286	-0.0828274	0.522841	0.469632	0.995634	0	-0.407217	11.8499	0.000576644	0.0039976	-1	-0.121969	1.12597	0.288637	0.496634	0
G1	_	SPAC607.09c	SPAC607.09c_G1	btn1	1270	5.02966	0.0896459	0.30806	0.578873	0.995634	0	-0.0934149	0.319943	0.571642	0.733213	0	-0.0915941	0.315503	0.574323	0.743346	0
G1	_	SPAC607.10	SPAC607.10_G1	spo3	4379	6.57999	-0.0549283	0.302959	0.582033	0.995634	0	0.00794263	0.00622573	0.93711	0.966603	0	0.126308	1.62596	0.202263	0.396988	0
G1	_	SPAC630.03	SPAC630.03_G1	arp3	1596	7.31618	-0.0260267	0.0887874	0.765724	0.995634	0	0.116312	1.76118	0.184477	0.35391	0	0.111612	1.64326	0.199878	0.394159	0
G1	_	SPAC630.04c	SPAC630.04c_G1		3102	4.28006	-0.019435	0.0150513	0.902358	0.995634	0	0.217272	1.89098	0.169091	0.334599	0	0.016484	0.0109163	0.916788	0.957106	0
G1	_	SPAC630.05	SPAC630.05_G1	gyp7	2798	6.66036	0.171737	2.06094	0.151117	0.912912	0	0.131907	1.19804	0.273714	0.459239	0	0.252137	4.45956	0.0347065	0.120036	0
G1	_	SPAC630.06c	SPAC630.06c_G1		3303	6.10855	0.0116953	0.0117123	0.913818	0.995634	0	0.0734569	0.452368	0.501212	0.678761	0	-0.0807818	0.551035	0.457895	0.652485	0
G1	_	SPAC630.07c	SPAC630.07c_G1		1904	4.36245	-0.321701	3.41701	0.0645277	0.746367	0	-0.0263793	0.0231952	0.87895	0.934076	0	0.0677403	0.160623	0.688583	0.825938	0
G1	_	SPAC630.10	SPAC630.10_G1	bmt2	1239	4.72218	0.0260823	0.0230029	0.879449	0.995634	0	0.466772	7.57822	0.00590777	0.0264835	1	0.368465	4.79704	0.0285086	0.10442	0
G1	_	SPAC630.11	SPAC630.11_G1	vps55	913	6.62293	-0.0623605	0.380296	0.537445	0.995634	0	-0.14762	2.06644	0.150572	0.308378	0	-0.00172268	0.000290792	0.986395	0.993114	0
G1	_	SPAC630.12	SPAC630.12_G1		1911	6.57789	-0.00740794	0.00610844	0.937704	0.995634	0	-0.021771	0.0513505	0.82073	0.899687	0	-0.0709989	0.555767	0.455971	0.650558	0
G1	_	SPAC630.13c	SPAC630.13c_G1	tsc2	4427	7.53156	0.0422385	0.195409	0.658453	0.995634	0	-0.144195	2.22335	0.135938	0.287908	0	-0.102519	1.13957	0.285744	0.493729	0
G1	_	SPAC630.14c	SPAC630.14c_G1	tup12	2872	7.42398	-0.00995578	0.0115559	0.914394	0.995634	0	0.0722156	0.601862	0.437868	0.621967	0	0.176828	3.67535	0.0552227	0.165986	0
G1	_	SPAC630.15	SPAC630.15_G1	mug177	2098	3.97065	0.375574	5.12284	0.023613	0.549972	0	-0.152482	0.718366	0.396681	0.585294	0	-0.205793	1.35864	0.243773	0.449729	0
G1	_	SPAC631.01c	SPAC631.01c_G1	acp2	1209	6.24078	0.137271	1.40545	0.235813	0.947728	0	0.271032	5.4243	0.0198585	0.0688727	0	0.266677	5.34517	0.0207798	0.0827362	0
G1	_	SPAC631.02	SPAC631.02_G1	bdf2	4534	7.40437	-0.103369	0.960897	0.326961	0.978887	0	-0.362642	11.5105	0.000692055	0.00466858	-1	-0.379341	12.7153	0.000362674	0.00323772	-1
G1	_	SPAC637.03	SPAC637.03_G1		1443	5.50001	-0.14034	0.824672	0.363818	0.98746	0	-0.741833	21.2166	4.10193e-06	5.36676e-05	-1	-0.553015	12.3039	0.000452023	0.00390197	-1
G1	_	SPAC637.04	SPAC637.04_G1	ypp1	3366	7.78124	0.0243964	0.0585966	0.808728	0.995634	0	0.0735007	0.527395	0.467704	0.648617	0	0.140983	1.95764	0.161766	0.341435	0
G1	_	SPAC637.05c	SPAC637.05c_G1	vma2	1936	9.25838	0.0445289	0.217719	0.640783	0.995634	0	0.247899	6.73351	0.00946181	0.0388324	1	0.311614	10.6793	0.0010834	0.00801611	1
G1	_	SPAC637.06	SPAC637.06_G1	gmh5	1434	7.95957	-0.0137078	0.0201203	0.887201	0.995634	0	-0.142406	2.14022	0.143481	0.299334	0	-0.192855	3.94537	0.0470004	0.148016	0
G1	_	SPAC637.07	SPAC637.07_G1	moe1	2002	7.8528	3.14418e-05	8.2475e-08	0.999771	0.999966	0	-0.218881	3.99985	0.0455042	0.129214	0	-0.19916	3.33695	0.0677402	0.191747	0
G1	_	SPAC637.08	SPAC637.08_G1	nbp35	1271	6.28334	0.170498	3.09332	0.0786144	0.789928	0	0.10748	1.18434	0.276475	0.461513	0	0.0819677	0.703452	0.401626	0.606358	0
G1	_	SPAC637.09	SPAC637.09_G1	rex1	2207	6.36731	0.0729666	0.340656	0.559451	0.995634	0	1.03514	73.0608	1.25715e-17	1.06467e-15	1	1.08348	80.7655	2.5416e-19	3.38897e-17	1
G1	_	SPAC637.10c	SPAC637.10c_G1	rpn10	1028	7.51239	0.0512113	0.209726	0.646982	0.995634	0	-0.0797703	0.500573	0.479249	0.658796	0	0.0122638	0.0119382	0.912995	0.955298	0
G1	_	SPAC637.11	SPAC637.11_G1	rpm2	2626	5.50098	-0.0197759	0.0257697	0.872464	0.995634	0	-0.101775	0.653467	0.418876	0.605418	0	-0.125985	1.02885	0.310428	0.519619	0
G1	_	SPAC637.12c	SPAC637.12c_G1	mst1	3818	6.34979	0.074652	0.477576	0.489523	0.995634	0	0.493345	21.275	3.97895e-06	5.21676e-05	1	0.353588	10.956	0.000933004	0.00709604	1
G1	_	SPAC637.13c	SPAC637.13c_G1	slm1	1860	6.68615	-0.0399235	0.157556	0.691417	0.995634	0	0.0962281	0.908315	0.340562	0.53198	0	0.0171438	0.0291357	0.864466	0.928468	0
G1	_	SPAC644.04	SPAC644.04_G1	pct1	2558	6.4199	0.011632	0.0108514	0.917034	0.995634	0	0.177124	2.49568	0.114159	0.254603	0	0.251973	5.18737	0.0227517	0.0880695	0
G1	_	SPAC644.05c	SPAC644.05c_G1	dut1	692	1.73164	0.471728	1.40896	0.235229	0.947728	0	0.425415	1.0737	0.300112	0.487859	0	0.451156	1.30386	0.253509	0.460638	0
G1	_	SPAC644.06c	SPAC644.06c_G1	cdr1	3049	6.78058	0.015009	0.0261632	0.871502	0.995634	0	0.124945	1.7905	0.180865	0.348764	0	0.246808	7.21916	0.00721295	0.0366021	1
G1	_	SPAC644.07	SPAC644.07_G1	bcs1	1751	6.28115	0.0750173	0.54705	0.459525	0.995634	0	-0.242884	5.37425	0.0204361	0.0706027	0	-0.248138	5.74874	0.0165005	0.0688931	0
G1	_	SPAC644.08	SPAC644.08_G1	utr4	1157	6.39785	0.0915474	0.723347	0.395048	0.991043	0	-0.0863911	0.61905	0.431401	0.616694	0	-0.144424	1.75513	0.185233	0.37447	0
G1	_	SPAC644.09	SPAC644.09_G1		955	6.63371	0.143675	1.66484	0.196951	0.925346	0	-0.16222	2.03324	0.153892	0.313105	0	-0.0497458	0.195485	0.65839	0.805413	0
G1	_	SPAC644.10	SPAC644.10_G1	med11	765	5.31151	-0.0355429	0.0686598	0.793298	0.995634	0	0.276308	4.20142	0.0403901	0.118172	0	0.251872	3.58442	0.0583237	0.172902	0
G1	_	SPAC644.11c	SPAC644.11c_G1	pkp1	2249	6.88997	0.0610619	0.358711	0.549223	0.995634	0	0.0878336	0.729615	0.393008	0.58199	0	0.112284	1.213	0.270739	0.478218	0
G1	_	SPAC644.12	SPAC644.12_G1	cdc5	2411	6.55556	0.0516651	0.207802	0.648496	0.995634	0	0.254612	5.02888	0.024928	0.0825271	0	0.0948319	0.700185	0.402721	0.607136	0
G1	_	SPAC644.13c	SPAC644.13c_G1		3269	7.02063	-0.0178237	0.0414749	0.838624	0.995634	0	-0.167479	3.52251	0.0605406	0.160633	0	-0.0186363	0.0452348	0.831573	0.90974	0
G1	_	SPAC644.14c	SPAC644.14c_G1	rad51	2174	6.53873	0.0398647	0.181729	0.669892	0.995634	0	0.309325	11.0139	0.000904326	0.00586082	1	0.280626	9.23382	0.00237586	0.0151585	1
G1	_	SPAC644.15	SPAC644.15_G1	rpp101	687	7.15324	0.316748	4.19438	0.0405583	0.637039	0	0.144168	0.857026	0.354572	0.544901	0	-0.111882	0.514508	0.473194	0.665957	0
G1	_	SPAC644.16	SPAC644.16_G1	rna15	1379	5.92007	-0.0816084	0.567021	0.451445	0.995634	0	0.0386638	0.1254	0.72325	0.84015	0	-0.116076	1.13845	0.285981	0.493731	0
G1	_	SPAC644.17c	SPAC644.17c_G1	mrpl9	2427	6.258	0.0621656	0.290987	0.589589	0.995634	0	-0.0401838	0.117697	0.731545	0.845753	0	-0.0193083	0.0277601	0.867674	0.930001	0
G1	_	SPAC644.18c	SPAC644.18c_G1	bet3	1274	7.0138	0.0703154	0.53358	0.465105	0.995634	0	0.0177371	0.0332139	0.855389	0.918713	0	0.0143913	0.0221654	0.881648	0.936984	0
G1	_	SPAC652.01	SPAC652.01_G1		1595	5.39851	-0.0950392	0.469531	0.493203	0.995634	0	-0.0668379	0.227227	0.633588	0.779944	0	-0.236707	2.86279	0.0906499	0.231784	0
G1	_	SPAC664.01c	SPAC664.01c_G1	swi6	1668	6.85263	0.0437715	0.19376	0.659805	0.995634	0	-0.152211	2.26301	0.132497	0.282819	0	-0.199277	3.91654	0.0478133	0.149973	0
G1	_	SPAC664.02c	SPAC664.02c_G1	arp8	2289	6.09674	-0.00864848	0.00782392	0.929517	0.995634	0	0.0444897	0.202096	0.653034	0.793133	0	-0.0647894	0.435017	0.509537	0.695574	0
G1	_	SPAC664.03	SPAC664.03_G1	paf1	1583	6.41246	0.123833	1.40208	0.236375	0.947728	0	0.127097	1.44098	0.22998	0.410205	0	0.0577781	0.302485	0.582329	0.749067	0
G1	_	SPAC664.04c	SPAC664.04c_G1	rps1602	509	7.20405	0.0803512	0.46895	0.493471	0.995634	0	0.147531	1.56664	0.210696	0.386092	0	-0.0375011	0.101036	0.75059	0.864696	0
G1	_	SPAC664.05	SPAC664.05_G1	rpl13	908	7.29995	0.0407144	0.0660377	0.797196	0.995634	0	0.0253176	0.0251049	0.874106	0.931478	0	0.0112107	0.00498968	0.943686	0.96968	0
G1	_	SPAC664.06	SPAC664.06_G1	rlp7	921	8.64267	0.00808322	0.00500699	0.943589	0.995634	0	0.967757	71.6909	2.51685e-17	1.99659e-15	1	0.980468	73.7185	9.00885e-18	1.02652e-15	1
G1	_	SPAC664.07c	SPAC664.07c_G1	rad9	1722	5.47198	-0.0313645	0.0468598	0.82862	0.995634	0	0.298036	4.29054	0.038325	0.113508	0	0.203903	2.027	0.154525	0.331647	0
G1	_	SPAC664.08c	SPAC664.08c_G1	bfr2	1634	6.82363	-0.0358373	0.141096	0.707194	0.995634	0	1.12433	153.675	2.72806e-35	9.4982e-33	1	0.789099	74.7286	5.40073e-18	6.26785e-16	1
G1	_	SPAC664.09	SPAC664.09_G1	ggt1	2782	6.65795	0.046935	0.152612	0.696052	0.995634	0	-0.544661	19.4318	1.04259e-05	0.000124455	-1	-0.655561	28.2424	1.07033e-07	2.29718e-06	-1
G1	_	SPAC664.10	SPAC664.10_G1	klp2	2959	6.55848	-0.0894896	0.867538	0.351638	0.983844	0	-0.108039	1.22988	0.267429	0.452479	0	-0.213267	4.8483	0.0276733	0.101897	0
G1	_	SPAC664.11	SPAC664.11_G1	ssc1	2332	10.6133	-0.0420464	0.158431	0.690605	0.995634	0	-0.484112	20.8373	5e-06	6.4211e-05	-1	-0.569766	28.7672	8.16213e-08	1.84e-06	-1
G1	_	SPAC664.12c	SPAC664.12c_G1	sdh6	2557	6.06922	-0.00731457	0.00352431	0.952661	0.995634	0	-0.441031	11.9982	0.000532526	0.00372471	-1	-0.335147	7.1551	0.0074751	0.037749	-1
G1	_	SPAC664.13	SPAC664.13_G1		354	3.96376	0.18738	0.912174	0.339538	0.983844	0	-0.125222	0.370466	0.54275	0.711091	0	0.141671	0.518054	0.471673	0.664524	0
G1	_	SPAC664.14	SPAC664.14_G1	amt2	2186	7.39937	0.0230649	0.0466469	0.829004	0.995634	0	-0.494484	20.6132	5.62082e-06	7.13071e-05	-1	-0.662501	36.8816	1.25522e-09	4.05488e-08	-1
G1	_	SPAC664.15	SPAC664.15_G1	mdv1	2927	5.76175	0.111613	1.11384	0.291248	0.970725	0	-0.164173	2.23094	0.135271	0.28711	0	-0.193535	3.19793	0.0737315	0.202044	0
G1	_	SPAC683.02c	SPAC683.02c_G1		1221	6.62317	0.189142	2.75882	0.0967197	0.829196	0	0.986723	78.1639	9.48364e-19	8.74029e-17	1	0.713309	40.6677	1.80449e-10	6.93787e-09	1
G1	_	SPAC688.02c	SPAC688.02c_G1	mis14	908	5.05175	-0.0195621	0.0131868	0.908577	0.995634	0	0.288387	2.88246	0.0895492	0.21541	0	0.285898	2.88993	0.0891346	0.229337	0
G1	_	SPAC688.03c	SPAC688.03c_G1		744	4.93061	-0.0314137	0.0573614	0.810716	0.995634	0	-0.441921	10.0725	0.001505	0.00876806	-1	-0.127118	0.922735	0.336758	0.545638	0
G1	_	SPAC688.04c	SPAC688.04c_G1	gst3	1290	5.64634	0.166546	1.64992	0.19897	0.927787	0	-0.0585054	0.193655	0.659892	0.796062	0	0.0355063	0.0736632	0.786076	0.885236	0
G1	_	SPAC688.06c	SPAC688.06c_G1	slx4	2199	4.13563	-0.173354	0.823809	0.364069	0.987655	0	0.263055	1.97136	0.160303	0.322097	0	0.352258	3.70163	0.0543592	0.164257	0
G1	_	SPAC688.07c	SPAC688.07c_G1	rng10	3387	6.71669	-0.146764	1.83774	0.175216	0.919597	0	-0.270038	6.03479	0.0140266	0.0524805	0	-0.0915932	0.71725	0.397047	0.602056	0
G1	_	SPAC688.08	SPAC688.08_G1	srb8	3405	7.17918	-0.0336694	0.131792	0.716582	0.995634	0	-0.146584	2.43284	0.118818	0.261549	0	-0.047372	0.260249	0.609949	0.770831	0
G1	_	SPAC688.09	SPAC688.09_G1	rim2	1879	5.88553	0.115488	1.03558	0.308852	0.972867	0	0.186975	2.66755	0.102414	0.237493	0	-0.0622379	0.294139	0.58758	0.752242	0
G1	_	SPAC688.10	SPAC688.10_G1	rev3	4786	6.01778	-0.0918626	0.584302	0.444631	0.995634	0	0.0477107	0.156144	0.692731	0.819252	0	0.11249	0.893237	0.344602	0.553106	0
G1	_	SPAC688.11	SPAC688.11_G1	end4	3705	8.1699	-0.0263048	0.0523702	0.818989	0.995634	0	0.0940895	0.667686	0.41386	0.600945	0	0.16063	1.95672	0.161864	0.341435	0
G1	_	SPAC688.12c	SPAC688.12c_G1		1106	5.81859	0.112559	0.652658	0.419164	0.995634	0	0.152979	1.18507	0.276327	0.461513	0	0.175535	1.58702	0.207752	0.40425	0
G1	_	SPAC688.13	SPAC688.13_G1	scn3	1723	5.91366	0.0431726	0.138354	0.709923	0.995634	0	-0.0322592	0.0743167	0.785152	0.878356	0	-0.160231	1.85015	0.173766	0.35822	0
G1	_	SPAC688.14	SPAC688.14_G1	set13	1796	6.51374	-0.0652821	0.370561	0.542699	0.995634	0	0.29869	7.84932	0.00508399	0.0235487	1	0.127683	1.43325	0.231235	0.434922	0
G1	_	SPAC688.16	SPAC688.16_G1		589	6.01595	-0.0642826	0.384717	0.53509	0.995634	0	-0.453237	17.537	2.81777e-05	0.000296291	-1	-0.439787	17.1009	3.54462e-05	0.000428017	-1
G1	_	SPAC694.03	SPAC694.03_G1		1979	6.3927	0.0519469	0.250366	0.616818	0.995634	0	0.0700147	0.444915	0.50476	0.681466	0	-0.0385748	0.136391	0.711896	0.841307	0
G1	_	SPAC694.04c	SPAC694.04c_G1		1218	6.31946	-0.0148924	0.0108511	0.917035	0.995634	0	0.221677	2.39511	0.121715	0.26578	0	0.371583	6.86727	0.00877889	0.0428484	1
[truncated: 33,989 more rows]

## Sheet: Notes
		EdgeR analysis, using the GLM pipeline and tagwise dispersion on gene counts from featureCounts
	ensembl	gene ID
	entrez	gene ID
	symbol	gene ID
	Length	Length of the gene (exons)
	aveLogCPM	the log 2 of the counts per million of the gene over all samples, basically the abundance of the gene
	logFC	log2 of the fold change
	LR	likelihood ratio test statistic
	PValue	pvalue of the test
	FDR	false discovery rate corrected/adjusted pvalue
	DE	shows if the gene is significant at FDR<0.05, -1 dowregulated, 1 upregulated, 0 not significant
